# Supplementary material for: Intramolecular domain dynamics regulate synaptic MAGUK protein interactions
Source: eLife journal article supplement (doi:10.7554/elife.41299), 2019-03-13
Supplement: supp [file elife-41299-supp-v1.zip]

Archive with 9 entries (9 files):
- elife_poa_e41299_Figure_2_source_data_1.xlsx
- elife_poa_e41299_Figure_1_figure_supplement_1.pdf
- elife_poa_e41299_Figure_1_source_data_1.xlsx
- elife_poa_e41299_Figure_3_source_data_1.xlsx
- elife_poa_e41299_Figure_1_figure_supplement_2.pdf
- elife_poa_e41299_Figure_5_source_data_1.xlsx
- elife_poa_e41299_Transparent_Reporting_File.pdf
- elife_poa_e41299_Figure_1_source_data_2.xlsx
- elife_poa_e41299_Figure_4_source_data_1.xlsx
