# Supplementary material for: Intramolecular domain dynamics regulate synaptic MAGUK protein interactions
Source: eLife journal article supplement (doi:10.7554/elife.41299), 2019-03-13
Supplement: supp [file elife-41299-supp-v1.zip › elife_poa_e41299_Figure_1_source_data_2.xlsx]

## Sheet: Figure 1E
Figure 1E
		Band Volume	Normalised	Band Volume	Normalised	Band Volume	Normalised	Mean	SEM
PSG + SH3-GK + PDZ3 ligand	Lane 1	221069	0.00310023	762857	0.00775131	669868	0.00714566	0.00599907	0.00145992
PSG + SH3-GK + mutPDZ3 ligand	Lane 2	72132.8	0.00101158	546292	0.00555082	396883	0.00423366	0.00359868	0.00134828
PSG + GK + PDZ3 ligand	Lane 3	7.13074e+07	1	9.84166e+07	1	9.37447e+07	1	1	0
PSG + GK + mutPDZ3 ligand	Lane 4	1.70894e+07	0.239658	2.47987e+07	0.251977	3.96177e+07	0.422612	0.304749	0.0590388
		Experiment 1		Experiment 2		Experiment 3
