# Supplementary material for: Intramolecular domain dynamics regulate synaptic MAGUK protein interactions
Source: eLife journal article supplement (doi:10.7554/elife.41299), 2019-03-13
Supplement: supp [file elife-41299-supp-v1.zip › elife_poa_e41299_Figure_2_source_data_1.xlsx]

## Sheet: A filtered
				Median:	0.8181
Hit numer	Member	Accession	Score	Mass	Heavy/Light Ratio	H/L Ratio Norm.	Standard deviation	pep count #	Description
2	1	MAP1A_RAT	19345	299348	1.169	1.42892	1.072	131	Microtubule-associated protein 1A OS=Rattus norvegicus GN=Map1a PE=1 SV=1
8		SRCN1_RAT	4872	129665	0.4596	0.56179	1.04	46	SRC kinase signaling inhibitor 1 OS=Rattus norvegicus GN=Srcin1 PE=1 SV=1
1	1	DLG4_RAT	33129	80416	2.194	2.68182	1.456	44	Disks large homolog 4 OS=Rattus norvegicus GN=Dlg4 PE=1 SV=1
12		SPTN1_RAT	3396	284462	1.148	1.40325	1.025	41	Spectrin alpha chain, non-erythrocytic 1 OS=Rattus norvegicus GN=Sptan1 PE=1 SV=2
2	2	MAP1B_RAT	3618	269334	1.028	1.25657	1.062	39	Microtubule-associated protein 1B OS=Rattus norvegicus GN=Map1b PE=1 SV=2
6		MTAP2_RAT	5341	202288	0.7191	0.878988	1.049	39	Microtubule-associated protein 2 OS=Rattus norvegicus GN=Map2 PE=1 SV=3
7		MAP6_RAT	4975	100423	0.7266	0.888155	1.044	39	Microtubule-associated protein 6 OS=Rattus norvegicus GN=Map6 PE=1 SV=1
16		CLH1_RAT	2455	191477	1.202	1.46926	1.029	38	Clathrin heavy chain 1 OS=Rattus norvegicus GN=Cltc PE=1 SV=3
22		ARHG2_RAT	1896	111840	1.181	1.44359	1.139	31	Rho guanine nucleotide exchange factor 2 OS=Rattus norvegicus GN=Arhgef2 PE=1 SV=1
10	1	AT1A3_RAT	3839	111620	0.7153	0.874343	1.064	31	Sodium/potassium-transporting ATPase subunit alpha-3 OS=Rattus norvegicus GN=Atp1a3 PE=1 SV=2
13		CLAP2_RAT	2736	140551	1.09	1.33236	1.023	31	CLIP-associating protein 2 OS=Rattus norvegicus GN=Clasp2 PE=1 SV=1
21		PABP1_RAT	1897	70656	1.18	1.44237	1.034	29	Polyadenylate-binding protein 1 OS=Rattus norvegicus GN=Pabpc1 PE=1 SV=1
10	2	AT1A2_RAT	3397	112145	0.7188	0.878621	1.07	28	Sodium/potassium-transporting ATPase subunit alpha-2 OS=Rattus norvegicus GN=Atp1a2 PE=1 SV=1
33		NSF_RAT	1562	82600	0.7389	0.90319	1.04	27	Vesicle-fusing ATPase OS=Rattus norvegicus GN=Nsf PE=1 SV=1
28		DHX30_RAT	1684	133913	1.176	1.43748	1.058	25	Putative ATP-dependent RNA helicase DHX30 OS=Rattus norvegicus GN=Dhx30 PE=1 SV=1
5	2	GSTM4_RAT	4837	25664	1.023	1.25046	1.073	23	Glutathione S-transferase Yb-3 OS=Rattus norvegicus GN=Gstm3 PE=1 SV=2
5	3	GSTM1_RAT	4765	25897	1.089	1.33113	1.125	22	Glutathione S-transferase Mu 1 OS=Rattus norvegicus GN=Gstm1 PE=1 SV=2
23	1	BRSK1_RAT	1889	85130	0.332	0.405818	1.08	22	Serine/threonine-protein kinase BRSK1 OS=Rattus norvegicus GN=Brsk1 PE=1 SV=1
9	1	ADT2_RAT	4494	32880	0.2478	0.302897	1.077	21	ADP/ATP translocase 2 OS=Rattus norvegicus GN=Slc25a5 PE=1 SV=3
24	1	DCLK2_RAT	1872	83964	0.3685	0.450434	1.067	21	Serine/threonine-protein kinase DCLK2 OS=Rattus norvegicus GN=Dclk2 PE=1 SV=2
26	1	PFKAP_RAT	1776	85665	0.5371	0.656521	1.065	21	ATP-dependent 6-phosphofructokinase, platelet type OS=Rattus norvegicus GN=Pfkp PE=1 SV=2
10	3	AT1A1_RAT	3265	112982	0.7195	0.879477	1.078	20	Sodium/potassium-transporting ATPase subunit alpha-1 OS=Rattus norvegicus GN=Atp1a1 PE=1 SV=1
34		DDX1_RAT	1547	82445	0.9232	1.12847	1.055	20	ATP-dependent RNA helicase DDX1 OS=Rattus norvegicus GN=Ddx1 PE=1 SV=1
15	1	HSP7C_RAT	2541	70827	1.088	1.32991	1.031	20	Heat shock cognate 71 kDa protein OS=Rattus norvegicus GN=Hspa8 PE=1 SV=1
5	4	GSTM2_RAT	2750	25686	1.008	1.23212	1.076	19	Glutathione S-transferase Mu 2 OS=Rattus norvegicus GN=Gstm2 PE=1 SV=2
44		ACON_RAT	1310	85380	0.8971	1.09657	1.071	19	Aconitate hydratase, mitochondrial OS=Rattus norvegicus GN=Aco2 PE=1 SV=2
26	2	PFKAM_RAT	1107	85506	0.408	0.498717	1.037	19	ATP-dependent 6-phosphofructokinase, muscle type OS=Rattus norvegicus GN=Pfkm PE=1 SV=3
41		NUCL_RAT	1395	77101	1.177	1.4387	1.149	18	Nucleolin OS=Rattus norvegicus GN=Ncl PE=1 SV=3
31		RS3_RAT	1580	26657	1.171	1.43137	1.116	18	40S ribosomal protein S3 OS=Rattus norvegicus GN=Rps3 PE=1 SV=1
5	1	GSTM5_RAT	5477	26611	0.9568	1.16954	1.102	18	Glutathione S-transferase Mu 5 OS=Rattus norvegicus GN=Gstm5 PE=1 SV=3
9	2	ADT1_RAT	4287	32968	0.2551	0.31182	1.072	18	ADP/ATP translocase 1 OS=Rattus norvegicus GN=Slc25a4 PE=1 SV=3
30	1	DPYL2_RAT	1649	62239	0.3586	0.438333	1.278	17	Dihydropyrimidinase-related protein 2 OS=Rattus norvegicus GN=Dpysl2 PE=1 SV=1
53		RACK1_RAT	1142	35055	0.9337	1.1413	1.165	17	Receptor of activated protein C kinase 1 OS=Rattus norvegicus GN=Rack1 PE=1 SV=3
20	2	MARK3_RAT	979	88696	0.9814	1.19961	1.094	17	MAP/microtubule affinity-regulating kinase 3 OS=Rattus norvegicus GN=Mark3 PE=1 SV=1
39		CALD1_RAT	1445	60548	0.9123	1.11514	1.091	17	Non-muscle caldesmon OS=Rattus norvegicus GN=Cald1 PE=1 SV=1
20	1	MARK2_RAT	1915	80821	0.7941	0.970664	1.091	17	Serine/threonine-protein kinase MARK2 OS=Rattus norvegicus GN=Mark2 PE=1 SV=1
58		RL7_RAT	1072	30310	1.136	1.38858	1.089	17	60S ribosomal protein L7 OS=Rattus norvegicus GN=Rpl7 PE=1 SV=2
15	2	GRP78_RAT	1421	72302	0.9258	1.13165	1.072	17	78 kDa glucose-regulated protein OS=Rattus norvegicus GN=Hspa5 PE=1 SV=1
49		RP3A_RAT	1254	75785	0.6241	0.762865	1.065	17	Rabphilin-3A OS=Rattus norvegicus GN=Rph3a PE=1 SV=1
98		OPA1_RAT	710	111238	0.7925	0.968708	1.059	17	Dynamin-like 120 kDa protein, mitochondrial OS=Rattus norvegicus GN=Opa1 PE=1 SV=1
71		GRP75_RAT	947	73812	0.7272	0.888889	1.052	17	Stress-70 protein, mitochondrial OS=Rattus norvegicus GN=Hspa9 PE=1 SV=3
20	3	MARK1_RAT	936	88180	1.02	1.24679	1.051	16	Serine/threonine-protein kinase MARK1 OS=Rattus norvegicus GN=Mark1 PE=1 SV=1
67	1	SYNJ1_RAT	1004	172773	0.8991	1.09901	1.043	16	Synaptojanin-1 OS=Rattus norvegicus GN=Synj1 PE=1 SV=3
94		RS2_RAT	715	31212	1.091	1.33358	2.458	15	40S ribosomal protein S2 OS=Rattus norvegicus GN=Rps2 PE=1 SV=1
89		RS3A_RAT	755	29926	1.077	1.31646	1.183	15	40S ribosomal protein S3a OS=Rattus norvegicus GN=Rps3a PE=1 SV=2
54		RL7A_RAT	1132	29977	1.197	1.46315	1.172	15	60S ribosomal protein L7a OS=Rattus norvegicus GN=Rpl7a PE=1 SV=2
72	1	GSTA3_RAT	927	25303	1.201	1.46804	1.165	15	Glutathione S-transferase alpha-3 OS=Rattus norvegicus GN=Gsta3 PE=1 SV=3
50	1	AT2B1_RAT	1248	138632	0.765	0.935094	1.083	15	Plasma membrane calcium-transporting ATPase 1 OS=Rattus norvegicus GN=Atp2b1 PE=1 SV=2
82		NCKP1_RAT	829	128781	1.034	1.2639	1.078	15	Nck-associated protein 1 OS=Rattus norvegicus GN=Nckap1 PE=2 SV=1
18	1	G3P_RAT	2261	35805	0.306	0.374037	1.395	14	Glyceraldehyde-3-phosphate dehydrogenase OS=Rattus norvegicus GN=Gapdh PE=1 SV=3
37		RL5_RAT	1466	34437	0.9571	1.16991	1.162	14	60S ribosomal protein L5 OS=Rattus norvegicus GN=Rpl5 PE=1 SV=3
69		IDH3B_RAT	992	42327	0.6078	0.742941	1.073	14	Isocitrate dehydrogenase [NAD] subunit beta, mitochondrial OS=Rattus norvegicus GN=Idh3B PE=2 SV=1
25		RSSA_RAT	1807	32803	1.044	1.27613	1.069	14	40S ribosomal protein SA OS=Rattus norvegicus GN=Rpsa PE=1 SV=3
142		ATAT_RAT	522	47298	0.7202	0.880332	1.06	14	Alpha-tubulin N-acetyltransferase 1 OS=Rattus norvegicus GN=Atat1 PE=1 SV=1
56		WDR7_RAT	1082	163086	0.7349	0.898301	1.045	14	WD repeat-containing protein 7 OS=Rattus norvegicus GN=Wdr7 PE=1 SV=1
73		RS4X_RAT	912	29579	1.114	1.36169	1.029	14	40S ribosomal protein S4, X isoform OS=Rattus norvegicus GN=Rps4x PE=2 SV=2
45		E41L1_RAT	1304	98182	1.376	1.68195	1.173	13	Band 4.1-like protein 1 OS=Rattus norvegicus GN=Epb41l1 PE=1 SV=1
27		LANC1_RAT	1744	45210	0.6893	0.842562	1.161	13	LanC-like protein 1 OS=Rattus norvegicus GN=Lancl1 PE=1 SV=2
24	2	DCLK1_RAT	1441	47651	0.4278	0.522919	1.059	13	Serine/threonine-protein kinase DCLK1 OS=Rattus norvegicus GN=Dclk1 PE=1 SV=1
83		ECHA_RAT	810	82613	0.6254	0.764454	1.056	13	Trifunctional enzyme subunit alpha, mitochondrial OS=Rattus norvegicus GN=Hadha PE=1 SV=2
62		UBP10_RAT	1034	87257	2.484	3.0363	1.913	12	Ubiquitin carboxyl-terminal hydrolase 10 OS=Rattus norvegicus GN=Usp10 PE=1 SV=1
29	1	HS105_RAT	1675	96357	2.034	2.48625	1.662	12	Heat shock protein 105 kDa OS=Rattus norvegicus GN=Hsph1 PE=1 SV=1
17		MBP_RAT	2411	21489	0.6326	0.773255	1.416	12	Myelin basic protein OS=Rattus norvegicus GN=Mbp PE=1 SV=3
77		AP2A2_RAT	883	103979	0.6082	0.74343	1.32	12	AP-2 complex subunit alpha-2 OS=Rattus norvegicus GN=Ap2a2 PE=1 SV=3
42		RLA0_RAT	1381	34194	1.009	1.23335	1.255	12	60S acidic ribosomal protein P0 OS=Rattus norvegicus GN=Rplp0 PE=1 SV=2
40		RL6_RAT	1438	33541	1.07	1.30791	1.13	12	60S ribosomal protein L6 OS=Rattus norvegicus GN=Rpl6 PE=1 SV=5
50	2	AT2B2_RAT	1095	136724	0.5854	0.71556	1.1	12	Plasma membrane calcium-transporting ATPase 2 OS=Rattus norvegicus GN=Atp2b2 PE=1 SV=2
162		RS9_RAT	441	22578	1.23	1.50348	1.096	12	40S ribosomal protein S9 OS=Rattus norvegicus GN=Rps9 PE=1 SV=4
51		HNRPM_RAT	1203	73733	0.796	0.972986	1.096	12	Heterogeneous nuclear ribonucleoprotein M OS=Rattus norvegicus GN=Hnrnpm PE=1 SV=4
81	1	FMR1_RAT	832	66740	1.154	1.41059	1.074	12	Synaptic functional regulator FMR1 OS=Rattus norvegicus GN=Fmr1 PE=1 SV=2
108	1	ELAV2_RAT	656	39481	0.8031	0.981665	1.069	12	ELAV-like protein 2 OS=Rattus norvegicus GN=Elavl2 PE=1 SV=1
74	1	MIC60_RAT	897	67135	0.9366	1.14485	1.057	12	MICOS complex subunit Mic60 (Fragment) OS=Rattus norvegicus GN=Immt PE=1 SV=1
36		MYO5A_RAT	1473	211630	1.009	1.23335	1.05	12	Unconventional myosin-Va OS=Rattus norvegicus GN=Myo5a PE=1 SV=1
55		VIGLN_RAT	1112	141496	1.286	1.57193	1.05	12	Vigilin OS=Rattus norvegicus GN=Hdlbp PE=1 SV=1
85		AGAP2_RAT	782	124361	1.081	1.32135	1.039	12	Arf-GAP with GTPase, ANK repeat and PH domain-containing protein 2 OS=Rattus norvegicus GN=Agap2 PE=1 SV=1
101		EIF3A_RAT	694	163097	1.662	2.03154	1.038	12	Eukaryotic translation initiation factor 3 subunit A OS=Rattus norvegicus GN=Eif3a PE=2 SV=2
52		SND1_RAT	1195	101888	0.9322	1.13947	1.388	11	Staphylococcal nuclease domain-containing protein 1 OS=Rattus norvegicus GN=Snd1 PE=1 SV=1
133		RL8_RAT	553	28007	1.192	1.45703	1.322	11	60S ribosomal protein L8 OS=Rattus norvegicus GN=Rpl8 PE=2 SV=2
181		PRKRA_RAT	409	34334	0.9777	1.19509	1.227	11	Interferon-inducible double-stranded RNA-dependent protein kinase activator A OS=Rattus norvegicus GN=Prkra PE=1 SV=1
157		SYNPO_RAT	465	99924	0.8064	0.985699	1.111	11	Synaptopodin OS=Rattus norvegicus GN=Synpo PE=1 SV=2
64		MINK1_RAT	1021	150289	0.5543	0.677546	1.106	11	Misshapen-like kinase 1 OS=Rattus norvegicus GN=Mink1 PE=1 SV=2
148		SDHA_RAT	493	71570	0.4914	0.60066	1.102	11	Succinate dehydrogenase [ubiquinone] flavoprotein subunit, mitochondrial OS=Rattus norvegicus GN=Sdha PE=1 SV=1
32		MAP4_RAT	1566	110233	0.6516	0.79648	1.094	11	Microtubule-associated protein 4 OS=Rattus norvegicus GN=Map4 PE=1 SV=1
81	2	FXR1_RAT	763	63908	1.123	1.37269	1.088	11	Fragile X mental retardation syndrome-related protein 1 OS=Rattus norvegicus GN=Fxr1 PE=1 SV=1
47		CAPR1_RAT	1273	78073	1.085	1.32624	1.084	11	Caprin-1 OS=Rattus norvegicus GN=Caprin1 PE=1 SV=2
65		S12A5_RAT	1018	126165	0.4741	0.579514	1.053	11	Solute carrier family 12 member 5 OS=Rattus norvegicus GN=Slc12a5 PE=1 SV=2
108	2	ELAV4_RAT	545	40938	0.8431	1.03056	1.049	11	ELAV-like protein 4 OS=Rattus norvegicus GN=Elavl4 PE=1 SV=1
57		AGO2_RAT	1075	97256	1.182	1.44481	1.04	11	Protein argonaute-2 OS=Rattus norvegicus GN=Ago2 PE=2 SV=2
30	2	DPYL1_RAT	1285	62157	0.5137	0.627918	1.396	10	Dihydropyrimidinase-related protein 1 OS=Rattus norvegicus GN=Crmp1 PE=1 SV=1
87		RS8_RAT	767	24190	1.029	1.25779	1.235	10	40S ribosomal protein S8 OS=Rattus norvegicus GN=Rps8 PE=1 SV=2
11	1	GSTP1_RAT	3558	23424	0.7771	0.949884	1.141	10	Glutathione S-transferase P OS=Rattus norvegicus GN=Gstp1 PE=1 SV=2
35		BSN_RAT	1474	418168	1.118	1.36658	1.117	10	Protein bassoon OS=Rattus norvegicus GN=Bsn PE=1 SV=3
99		KPCG_RAT	709	78307	1.027	1.25535	1.099	10	Protein kinase C gamma type OS=Rattus norvegicus GN=Prkcg PE=1 SV=1
186		HMGCL_RAT	403	34170	1.005	1.22846	1.089	10	Hydroxymethylglutaryl-CoA lyase, mitochondrial OS=Rattus norvegicus GN=Hmgcl PE=2 SV=1
46	1	ACTG_RAT	1287	41766	0.3168	0.387239	1.086	10	Actin, cytoplasmic 2 OS=Rattus norvegicus GN=Actg1 PE=1 SV=1
197		GRPE1_RAT	368	24282	0.676	0.826305	1.086	10	GrpE protein homolog 1, mitochondrial OS=Rattus norvegicus GN=Grpel1 PE=1 SV=2
72	2	GSTA4_RAT	329	25493	1.203	1.47048	1.076	10	Glutathione S-transferase alpha-4 OS=Rattus norvegicus GN=Gsta4 PE=1 SV=2
139		CBR1_RAT	535	30559	1.057	1.29202	1.066	10	Carbonyl reductase [NADPH] 1 OS=Rattus norvegicus GN=Cbr1 PE=1 SV=2
66		FARP1_RAT	1016	118768	1.009	1.23335	1.055	10	FERM, RhoGEF and pleckstrin domain-containing protein 1 OS=Rattus norvegicus GN=Farp1 PE=1 SV=2
78		M2OM_RAT	864	34222	3092	3779.49	28.39	9	Mitochondrial 2-oxoglutarate/malate carrier protein OS=Rattus norvegicus GN=Slc25a11 PE=1 SV=3
91	1	DYN1_RAT	746	97234	0.6797	0.830828	1.397	9	Dynamin-1 OS=Rattus norvegicus GN=Dnm1 PE=1 SV=2
119		PURB_RAT	608	33398	1.08	1.32013	1.258	9	Transcriptional activator protein Pur-beta OS=Rattus norvegicus GN=Purb PE=1 SV=3
59		RS6_RAT	1071	28663	1.499	1.83229	1.245	9	40S ribosomal protein S6 OS=Rattus norvegicus GN=Rps6 PE=1 SV=1
23	2	BRSK2_RAT	365	81403	0.3224	0.394084	1.21	9	Serine/threonine-protein kinase BRSK2 OS=Rattus norvegicus GN=Brsk2 PE=1 SV=1
239		RL15_RAT	299	24131	1.481	1.81029	1.208	9	60S ribosomal protein L15 OS=Rattus norvegicus GN=Rpl15 PE=1 SV=2
43		APC_RAT	1326	310342	0.7364	0.900134	1.129	9	Adenomatous polyposis coli protein OS=Rattus norvegicus GN=Apc PE=1 SV=1
114	1	SFXN3_RAT	628	35411	0.191	0.233468	1.118	9	Sideroflexin-3 OS=Rattus norvegicus GN=Sfxn3 PE=2 SV=1
72	3	GSTA6_RAT	324	25791	1.165	1.42403	1.094	9	Glutathione S-transferase A6 OS=Rattus norvegicus GN=Gsta6 PE=1 SV=1
26	3	PFKAL_RAT	822	85284	0.4688	0.573035	1.084	9	ATP-dependent 6-phosphofructokinase, liver type OS=Rattus norvegicus GN=Pfkl PE=1 SV=3
110		CNKR2_RAT	650	117317	0.9551	1.16746	1.072	9	Connector enhancer of kinase suppressor of ras 2 OS=Rattus norvegicus GN=Cnksr2 PE=1 SV=1
130		HP1B3_RAT	556	60769	1.324	1.61838	1.066	9	Heterochromatin protein 1-binding protein 3 OS=Rattus norvegicus GN=Hp1bp3 PE=1 SV=1
129		KIF2A_RAT	559	79743	1.097	1.34091	1.043	9	Kinesin-like protein KIF2A OS=Rattus norvegicus GN=Kif2a PE=1 SV=2
1	2	DLG1_RAT	1007	100509	2.678	3.27344	1.878	8	Disks large homolog 1 OS=Rattus norvegicus GN=Dlg1 PE=1 SV=1
95	2	1433T_RAT	625	27761	0.9755	1.1924	1.219	8	14-3-3 protein theta OS=Rattus norvegicus GN=Ywhaq PE=1 SV=1
102		EIF3B_RAT	693	90854	2.169	2.65127	1.186	8	Eukaryotic translation initiation factor 3 subunit B OS=Rattus norvegicus GN=Eif3b PE=1 SV=1
128		PHAR1_RAT	561	66175	1.02	1.24679	1.179	8	Phosphatase and actin regulator 1 OS=Rattus norvegicus GN=Phactr1 PE=1 SV=1
88	1	LIPA3_RAT	764	133347	1.916	2.34201	1.159	8	Liprin-alpha-3 OS=Rattus norvegicus GN=Ppfia3 PE=1 SV=2
191		RL10A_RAT	392	24816	1.352	1.65261	1.152	8	60S ribosomal protein L10a OS=Rattus norvegicus GN=Rpl10a PE=1 SV=2
61		EAA2_RAT	1040	62066	0.4483	0.547977	1.138	8	Excitatory amino acid transporter 2 OS=Rattus norvegicus GN=Slc1a2 PE=1 SV=2
46	2	ACTC_RAT	793	41992	0.3006	0.367437	1.133	8	Actin, alpha cardiac muscle 1 OS=Rattus norvegicus GN=Actc1 PE=2 SV=1
125		TXTP_RAT	582	33814	0.2204	0.269405	1.128	8	Tricarboxylate transport protein, mitochondrial OS=Rattus norvegicus GN=Slc25a1 PE=1 SV=1
14	2	TBB2A_RAT	2577	49875	0.4961	0.606405	1.117	8	Tubulin beta-2A chain OS=Rattus norvegicus GN=Tubb2a PE=1 SV=1
14	1	TBB2B_RAT	2600	49921	0.4961	0.606405	1.117	8	Tubulin beta-2B chain OS=Rattus norvegicus GN=Tubb2b PE=1 SV=1
50	3	AT2B3_RAT	752	138471	0.6862	0.838773	1.1	8	Plasma membrane calcium-transporting ATPase 3 OS=Rattus norvegicus GN=Atp2b3 PE=1 SV=2
117	1	GNAO_RAT	612	40043	0.5648	0.69038	1.097	8	Guanine nucleotide-binding protein G(o) subunit alpha OS=Rattus norvegicus GN=Gnao1 PE=1 SV=2
15	3	HSP72_RAT	1217	69599	1.033	1.26268	1.093	8	Heat shock-related 70 kDa protein 2 OS=Rattus norvegicus GN=Hspa2 PE=1 SV=2
198	1	CAZA2_RAT	366	32947	0.8657	1.05818	1.07	8	F-actin-capping protein subunit alpha-2 OS=Rattus norvegicus GN=Capza2 PE=1 SV=1
178		GLRX3_RAT	416	37825	0.9558	1.16832	1.061	8	Glutaredoxin-3 OS=Rattus norvegicus GN=Glrx3 PE=1 SV=2
164	1	PYGM_RAT	437	97212	0.8458	1.03386	1.046	8	Glycogen phosphorylase, muscle form OS=Rattus norvegicus GN=Pygm PE=1 SV=5
106		SYYC_RAT	667	59078	0.6171	0.754309	1.046	8	Tyrosine--tRNA ligase, cytoplasmic OS=Rattus norvegicus GN=Yars PE=2 SV=3
63	1	AP2B1_RAT	1024	104486	0.9288	1.13531	2.202	7	AP-2 complex subunit beta OS=Rattus norvegicus GN=Ap2b1 PE=1 SV=1
84		NPM_RAT	799	32540	1.14	1.39347	1.286	7	Nucleophosmin OS=Rattus norvegicus GN=Npm1 PE=1 SV=1
95	1	1433Z_RAT	715	27754	0.9913	1.21171	1.235	7	14-3-3 protein zeta/delta OS=Rattus norvegicus GN=Ywhaz PE=1 SV=1
182	1	VDAC2_RAT	406	31726	0.8181	1	1.19	7	Voltage-dependent anion-selective channel protein 2 OS=Rattus norvegicus GN=Vdac2 PE=1 SV=2
177		MK01_RAT	416	41249	0.5533	0.676323	1.145	7	Mitogen-activated protein kinase 1 OS=Rattus norvegicus GN=Mapk1 PE=1 SV=3
80		SPTN2_RAT	844	270897	1.152	1.40814	1.144	7	Spectrin beta chain, non-erythrocytic 2 OS=Rattus norvegicus GN=Sptbn2 PE=1 SV=2
105		TENR_RAT	678	149277	1.462	1.78707	1.105	7	Tenascin-R OS=Rattus norvegicus GN=Tnr PE=1 SV=1
150		GLNA_RAT	491	42240	0.474	0.579391	1.104	7	Glutamine synthetase OS=Rattus norvegicus GN=Glul PE=1 SV=3
96	1	DLGP2_RAT	714	118903	0.6032	0.737318	1.101	7	Disks large-associated protein 2 OS=Rattus norvegicus GN=Dlgap2 PE=1 SV=3
151		ODO1_RAT	491	116221	0.767	0.937538	1.1	7	2-oxoglutarate dehydrogenase, mitochondrial OS=Rattus norvegicus GN=Ogdh PE=1 SV=1
60		ANK3_RAT	1068	284266	1.022	1.24924	1.091	7	Ankyrin-3 OS=Rattus norvegicus GN=Ank3 PE=1 SV=3
104	1	MAST1_RAT	680	170923	0.5942	0.726317	1.075	7	Microtubule-associated serine/threonine-protein kinase 1 OS=Rattus norvegicus GN=Mast1 PE=1 SV=1
109		LYRIC_RAT	650	63931	1.029	1.25779	1.071	7	Protein LYRIC OS=Rattus norvegicus GN=Mtdh PE=1 SV=2
48		RL18_RAT	1261	21645	1.283	1.56827	1.069	7	60S ribosomal protein L18 OS=Rattus norvegicus GN=Rpl18 PE=1 SV=2
75	1	C2D1A_RAT	892	103523	0.3084	0.376971	1.058	7	Coiled-coil and C2 domain-containing protein 1A OS=Rattus norvegicus GN=Cc2d1a PE=1 SV=2
122		EIF3C_RAT	594	105369	1.571	1.9203	1.056	7	Eukaryotic translation initiation factor 3 subunit C OS=Rattus norvegicus GN=Eif3c PE=1 SV=1
149		ACSL6_RAT	492	78130	0.5453	0.666544	1.035	7	Long-chain-fatty-acid--CoA ligase 6 OS=Rattus norvegicus GN=Acsl6 PE=1 SV=1
147	1	TRIM3_RAT	500	80745	1.055	1.28957	1.032	7	Tripartite motif-containing protein 3 OS=Rattus norvegicus GN=Trim3 PE=1 SV=1
1	3	DLG3_RAT	884	93481	0.07795	0.0952818	2.94	6	Disks large homolog 3 OS=Rattus norvegicus GN=Dlg3 PE=1 SV=1
166		MPCP_RAT	434	39419	0.3182	0.38895	1.287	6	Phosphate carrier protein, mitochondrial OS=Rattus norvegicus GN=Slc25a3 PE=1 SV=1
158		GHC2_RAT	462	34148	0.2466	0.30143	1.281	6	Mitochondrial glutamate carrier 2 OS=Rattus norvegicus GN=Slc25a18 PE=2 SV=2
113		S27A1_RAT	632	71238	0.07206	0.0880821	1.275	6	Long-chain fatty acid transport protein 1 OS=Rattus norvegicus GN=Slc27a1 PE=2 SV=1
140	1	AAPK1_RAT	529	63933	0.2694	0.3293	1.252	6	5'-AMP-activated protein kinase catalytic subunit alpha-1 OS=Rattus norvegicus GN=Prkaa1 PE=1 SV=2
19	1	TBA1A_RAT	2099	50104	0.6251	0.764088	1.184	6	Tubulin alpha-1A chain OS=Rattus norvegicus GN=Tuba1a PE=1 SV=1
230		RL13A_RAT	309	23461	1.324	1.61838	1.177	6	60S ribosomal protein L13a OS=Rattus norvegicus GN=Rpl13a PE=1 SV=2
118		SYTL5_RAT	612	83593	1.429	1.74673	1.16	6	Synaptotagmin-like protein 5 OS=Rattus norvegicus GN=Sytl5 PE=2 SV=1
235		CAPZB_RAT	305	30609	0.8419	1.02909	1.123	6	F-actin-capping protein subunit beta OS=Rattus norvegicus GN=Capzb PE=1 SV=1
100		LRRC7_RAT	707	166774	0.7082	0.865664	1.119	6	Leucine-rich repeat-containing protein 7 OS=Rattus norvegicus GN=Lrrc7 PE=1 SV=2
153		MECP2_RAT	479	53015	1.238	1.51326	1.113	6	Methyl-CpG-binding protein 2 OS=Rattus norvegicus GN=Mecp2 PE=1 SV=1
298		CAMKV_RAT	230	54072	1.278	1.56216	1.1	6	CaM kinase-like vesicle-associated protein OS=Rattus norvegicus GN=Camkv PE=1 SV=1
145		PURA_RAT	508	15313	0.6457	0.789268	1.096	6	Transcriptional activator protein Pur-alpha (Fragments) OS=Rattus norvegicus GN=Pura PE=1 SV=1
174		ATAD3_RAT	420	66718	0.2809	0.343357	1.094	6	ATPase family AAA domain-containing protein 3 OS=Rattus norvegicus GN=Atad3 PE=1 SV=1
144		SV2A_RAT	509	82608	0.4681	0.572179	1.081	6	Synaptic vesicle glycoprotein 2A OS=Rattus norvegicus GN=Sv2a PE=1 SV=2
121	2	PP2BB_RAT	515	59076	0.2953	0.360958	1.071	6	Serine/threonine-protein phosphatase 2B catalytic subunit beta isoform OS=Rattus norvegicus GN=Ppp3cb PE=1 SV=1
248		RL10_RAT	287	24588	1.353	1.65383	1.066	6	60S ribosomal protein L10 OS=Rattus norvegicus GN=Rpl10 PE=1 SV=3
68	1	MYH10_RAT	998	228824	1.052	1.28591	1.048	6	Myosin-10 OS=Rattus norvegicus GN=Myh10 PE=1 SV=1
30	3	DPYL3_RAT	594	61928	0.3808	0.465469	1.935	5	Dihydropyrimidinase-related protein 3 OS=Rattus norvegicus GN=Dpysl3 PE=1 SV=2
97		RL13_RAT	713	24294	1.117	1.36536	1.312	5	60S ribosomal protein L13 OS=Rattus norvegicus GN=Rpl13 PE=1 SV=2
383		RS7_RAT	156	22113	0.9085	1.1105	1.236	5	40S ribosomal protein S7 OS=Rattus norvegicus GN=Rps7 PE=1 SV=1
172		HBS1L_RAT	423	74727	1.33	1.62572	1.202	5	HBS1-like protein OS=Rattus norvegicus GN=Hbs1l PE=1 SV=1
146	1	SYGP1_RAT	507	144631	0.818	0.999878	1.2	5	Ras/Rap GTPase-activating protein SynGAP OS=Rattus norvegicus GN=Syngap1 PE=1 SV=2
227		TPIS_RAT	313	26832	1.099	1.34336	1.176	5	Triosephosphate isomerase OS=Rattus norvegicus GN=Tpi1 PE=1 SV=2
91	2	DYN2_RAT	449	98169	1.018	1.24435	1.168	5	Dynamin-2 OS=Rattus norvegicus GN=Dnm2 PE=1 SV=1
95	5	1433B_RAT	235	28037	0.6814	0.832906	1.154	5	14-3-3 protein beta/alpha OS=Rattus norvegicus GN=Ywhab PE=1 SV=3
195		TRIO_RAT	382	347642	0.7734	0.945361	1.149	5	Triple functional domain protein OS=Rattus norvegicus GN=Trio PE=1 SV=4
182	2	VDAC3_RAT	338	30778	0.6161	0.753086	1.145	5	Voltage-dependent anion-selective channel protein 3 OS=Rattus norvegicus GN=Vdac3 PE=1 SV=2
423		GRB2_RAT	130	25190	0.9281	1.13446	1.141	5	Growth factor receptor-bound protein 2 OS=Rattus norvegicus GN=Grb2 PE=1 SV=1
14	5	TBB3_RAT	1868	50386	0.5563	0.67999	1.138	5	Tubulin beta-3 chain OS=Rattus norvegicus GN=Tubb3 PE=1 SV=1
14	4	TBB5_RAT	1892	49639	0.5165	0.631341	1.137	5	Tubulin beta-5 chain OS=Rattus norvegicus GN=Tubb5 PE=1 SV=1
332		CDK5_RAT	195	33233	0.4244	0.518763	1.135	5	Cyclin-dependent-like kinase 5 OS=Rattus norvegicus GN=Cdk5 PE=1 SV=1
14	3	TBB4B_RAT	2336	49769	0.4985	0.609339	1.133	5	Tubulin beta-4B chain OS=Rattus norvegicus GN=Tubb4b PE=1 SV=1
312		GLO2_RAT	212	34088	0.9376	1.14607	1.121	5	Hydroxyacylglutathione hydrolase, mitochondrial OS=Rattus norvegicus GN=Hagh PE=1 SV=2
95	3	1433E_RAT	409	29155	0.9159	1.11955	1.117	5	14-3-3 protein epsilon OS=Rattus norvegicus GN=Ywhae PE=1 SV=1
198	2	CAZA1_RAT	228	32889	0.8391	1.02567	1.116	5	F-actin-capping protein subunit alpha-1 OS=Rattus norvegicus GN=Capza1 PE=1 SV=1
95	6	1433F_RAT	227	28194	0.8427	1.03007	1.115	5	14-3-3 protein eta OS=Rattus norvegicus GN=Ywhah PE=1 SV=2
161	1	NUMBL_RAT	442	65472	0.6185	0.75602	1.113	5	Numb-like protein OS=Rattus norvegicus GN=Numbl PE=1 SV=1
95	4	1433G_RAT	332	28285	0.8301	1.01467	1.104	5	14-3-3 protein gamma OS=Rattus norvegicus GN=Ywhag PE=1 SV=2
265		RL17_RAT	268	21383	1.15	1.4057	1.101	5	60S ribosomal protein L17 OS=Rattus norvegicus GN=Rpl17 PE=2 SV=3
577		RS5_RAT	70	22864	0.8247	1.00807	1.099	5	40S ribosomal protein S5 OS=Rattus norvegicus GN=Rps5 PE=1 SV=3
202		EF2_RAT	361	95223	0.689	0.842195	1.097	5	Elongation factor 2 OS=Rattus norvegicus GN=Eef2 PE=1 SV=4
261		ROGDI_RAT	275	32185	0.6223	0.760665	1.097	5	Protein rogdi homolog OS=Rattus norvegicus GN=Rogdi PE=2 SV=1
328		RL9_RAT	198	21880	1.371	1.67583	1.094	5	60S ribosomal protein L9 OS=Rattus norvegicus GN=Rpl9 PE=1 SV=1
134		HCD2_RAT	550	27229	0.4907	0.599804	1.093	5	3-hydroxyacyl-CoA dehydrogenase type-2 OS=Rattus norvegicus GN=Hsd17b10 PE=1 SV=3
243		PRPS1_RAT	294	34812	0.6079	0.743063	1.092	5	Ribose-phosphate pyrophosphokinase 1 OS=Rattus norvegicus GN=Prps1 PE=1 SV=2
203	1	GBB1_RAT	357	37353	0.3699	0.452145	1.087	5	Guanine nucleotide-binding protein G(I)/G(S)/G(T) subunit beta-1 OS=Rattus norvegicus GN=Gnb1 PE=1 SV=4
323		SNPH_RAT	204	54460	0.9394	1.14827	1.086	5	Syntaphilin OS=Rattus norvegicus GN=Snph PE=1 SV=1
10	4	AT1A4_RAT	406	113932	0.705	0.861753	1.07	5	Sodium/potassium-transporting ATPase subunit alpha-4 OS=Rattus norvegicus GN=Atp1a4 PE=2 SV=1
304		ROA3_RAT	219	39628	1.012	1.23701	1.068	5	Heterogeneous nuclear ribonucleoprotein A3 OS=Rattus norvegicus GN=Hnrnpa3 PE=1 SV=1
280		ELAV1_RAT	247	36146	0.9656	1.1803	1.066	5	ELAV-like protein 1 OS=Rattus norvegicus GN=Elavl1 PE=1 SV=1
292		SMBP2_RAT	235	108373	1.092	1.3348	1.064	5	DNA-binding protein SMUBP-2 OS=Rattus norvegicus GN=Ighmbp2 PE=1 SV=1
305		GIT1_RAT	217	85178	0.7112	0.869331	1.045	5	ARF GTPase-activating protein GIT1 OS=Rattus norvegicus GN=Git1 PE=1 SV=1
259	1	AMPH_RAT	276	74832	0.8407	1.02762	1.041	5	Amphiphysin OS=Rattus norvegicus GN=Amph PE=1 SV=1
70		LUZP1_RAT	971	117105	1.485	1.81518	1.038	5	Leucine zipper protein 1 OS=Rattus norvegicus GN=Luzp1 PE=1 SV=1
325	1	MARE3_RAT	200	31946	0.7677	0.938394	1.033	5	Microtubule-associated protein RP/EB family member 3 OS=Rattus norvegicus GN=Mapre3 PE=1 SV=1
103	1	YMEL1_RAT	686	79817	0.4422	0.540521	13.19	4	ATP-dependent zinc metalloprotease YME1L1 OS=Rattus norvegicus GN=Yme1l1 PE=2 SV=1
140	2	AAPK2_RAT	299	62218	0.04902	0.0599193	2.071	4	5'-AMP-activated protein kinase catalytic subunit alpha-2 OS=Rattus norvegicus GN=Prkaa2 PE=1 SV=1
30	4	DPYL4_RAT	450	61047	0.1243	0.151937	1.737	4	Dihydropyrimidinase-related protein 4 (Fragment) OS=Rattus norvegicus GN=Dpysl4 PE=1 SV=1
208		SORT_RAT	340	91111	0.06644	0.0812126	1.501	4	Sortilin OS=Rattus norvegicus GN=Sort1 PE=1 SV=3
364		KHDR1_RAT	169	48285	0.1898	0.232001	1.417	4	KH domain-containing, RNA-binding, signal transduction-associated protein 1 OS=Rattus norvegicus GN=Khdrbs1 PE=1 SV=1
76		INP4A_RAT	885	105522	0.1742	0.212932	1.416	4	Type I inositol 3,4-bisphosphate 4-phosphatase OS=Rattus norvegicus GN=Inpp4a PE=1 SV=1
170		DREB_RAT	425	77424	0.9559	1.16844	1.365	4	Drebrin OS=Rattus norvegicus GN=Dbn1 PE=1 SV=3
196	1	HS90B_RAT	373	83229	0.9254	1.13116	1.277	4	Heat shock protein HSP 90-beta OS=Rattus norvegicus GN=Hsp90ab1 PE=1 SV=4
138		TRIM9_RAT	537	79155	0.5776	0.706026	1.267	4	E3 ubiquitin-protein ligase TRIM9 OS=Rattus norvegicus GN=Trim9 PE=1 SV=1
279		SPS2L_RAT	247	61736	1.05	1.28346	1.262	4	SPATS2-like protein OS=Rattus norvegicus GN=Spats2l PE=2 SV=1
209		BDH_RAT	340	38177	0.4416	0.539787	1.236	4	D-beta-hydroxybutyrate dehydrogenase, mitochondrial OS=Rattus norvegicus GN=Bdh1 PE=1 SV=2
159		LONP2_RAT	454	94334	0.3967	0.484904	1.235	4	Lon protease homolog 2, peroxisomal OS=Rattus norvegicus GN=Lonp2 PE=1 SV=2
91	3	DYN3_RAT	329	97853	1.049	1.28224	1.229	4	Dynamin-3 OS=Rattus norvegicus GN=Dnm3 PE=1 SV=2
121	1	PP2BA_RAT	596	58606	0.2929	0.358025	1.229	4	Serine/threonine-protein phosphatase 2B catalytic subunit alpha isoform OS=Rattus norvegicus GN=Ppp3ca PE=1 SV=1
19	2	TBA4A_RAT	1105	49892	0.5194	0.634886	1.193	4	Tubulin alpha-4A chain OS=Rattus norvegicus GN=Tuba4a PE=1 SV=1
415		SEPT5_RAT	135	42825	0.5131	0.627185	1.192	4	Septin-5 OS=Rattus norvegicus GN=Sept5 PE=1 SV=2
136	2	EF1A1_RAT	484	50082	0.5276	0.644909	1.191	4	Elongation factor 1-alpha 1 OS=Rattus norvegicus GN=Eef1a1 PE=2 SV=1
123		RL14_RAT	590	23324	0.9298	1.13654	1.188	4	60S ribosomal protein L14 OS=Rattus norvegicus GN=Rpl14 PE=1 SV=3
281		MATR3_RAT	246	94389	1.499	1.83229	1.188	4	Matrin-3 OS=Rattus norvegicus GN=Matr3 PE=1 SV=2
165		DNM1L_RAT	434	83856	0.7554	0.923359	1.173	4	Dynamin-1-like protein OS=Rattus norvegicus GN=Dnm1l PE=1 SV=1
232		SNP25_RAT	308	23300	0.553	0.675956	1.164	4	Synaptosomal-associated protein 25 OS=Rattus norvegicus GN=Snap25 PE=1 SV=1
143		STXB1_RAT	513	67526	0.41	0.501161	1.163	4	Syntaxin-binding protein 1 OS=Rattus norvegicus GN=Stxbp1 PE=1 SV=1
340		S61A1_RAT	188	52231	0.8294	1.01381	1.158	4	Protein transport protein Sec61 subunit alpha isoform 1 OS=Rattus norvegicus GN=Sec61a1 PE=2 SV=2
216		H14_RAT	327	21974	1.071	1.30913	1.152	4	Histone H1.4 OS=Rattus norvegicus GN=Hist1h1e PE=1 SV=3
241		EIF3D_RAT	295	63948	1.172	1.43259	1.143	4	Eukaryotic translation initiation factor 3 subunit D OS=Rattus norvegicus GN=Eif3d PE=1 SV=1
267		LYSM1_RAT	261	24863	0.6645	0.812248	1.122	4	LysM and putative peptidoglycan-binding domain-containing protein 1 OS=Rattus norvegicus GN=Lysmd1 PE=1 SV=1
264		SRC8_RAT	272	56907	0.9957	1.21709	1.122	4	Src substrate cortactin OS=Rattus norvegicus GN=Cttn PE=1 SV=1
90		AT2A2_RAT	746	114694	0.2372	0.28994	1.121	4	Sarcoplasmic/endoplasmic reticulum calcium ATPase 2 OS=Rattus norvegicus GN=Atp2a2 PE=1 SV=1
339		VDAC1_RAT	190	30737	0.7682	0.939005	1.114	4	Voltage-dependent anion-selective channel protein 1 OS=Rattus norvegicus GN=Vdac1 PE=1 SV=4
219		CSDE1_RAT	323	88839	0.8521	1.04156	1.11	4	Cold shock domain-containing protein E1 OS=Rattus norvegicus GN=Csde1 PE=2 SV=1
217		HNRPQ_RAT	326	59674	0.8276	1.01161	1.11	4	Heterogeneous nuclear ribonucleoprotein Q OS=Rattus norvegicus GN=Syncrip PE=2 SV=1
92		RL19_RAT	740	23451	1.348	1.64772	1.109	4	60S ribosomal protein L19 OS=Rattus norvegicus GN=Rpl19 PE=1 SV=1
214		TDRD3_RAT	329	72983	1.019	1.24557	1.108	4	Tudor domain-containing protein 3 OS=Rattus norvegicus GN=Tdrd3 PE=1 SV=1
381		EIF3H_RAT	158	39880	1.014	1.23946	1.107	4	Eukaryotic translation initiation factor 3 subunit H OS=Rattus norvegicus GN=Eif3h PE=1 SV=1
179	1	JKIP1_RAT	414	73062	1.14	1.39347	1.106	4	Janus kinase and microtubule-interacting protein 1 OS=Rattus norvegicus GN=Jakmip1 PE=1 SV=1
185		SYRC_RAT	404	75762	0.8832	1.07957	1.09	4	Arginine--tRNA ligase, cytoplasmic OS=Rattus norvegicus GN=Rars PE=1 SV=2
215		ATPG_RAT	329	30172	0.5058	0.618262	1.086	4	ATP synthase subunit gamma, mitochondrial OS=Rattus norvegicus GN=Atp5c1 PE=1 SV=2
349		PGAM5_RAT	181	32041	0.7551	0.922992	1.085	4	Serine/threonine-protein phosphatase PGAM5, mitochondrial OS=Rattus norvegicus GN=Pgam5 PE=2 SV=1
203	2	GBB2_RAT	167	37307	0.3814	0.466202	1.084	4	Guanine nucleotide-binding protein G(I)/G(S)/G(T) subunit beta-2 OS=Rattus norvegicus GN=Gnb2 PE=1 SV=4
326		PHB2_RAT	200	33292	0.5377	0.657255	1.082	4	Prohibitin-2 OS=Rattus norvegicus GN=Phb2 PE=1 SV=1
301		DDB1_RAT	226	126781	1.064	1.30057	1.081	4	DNA damage-binding protein 1 OS=Rattus norvegicus GN=Ddb1 PE=1 SV=1
111		CSKI1_RAT	639	150255	0.7162	0.875443	1.075	4	Caskin-1 OS=Rattus norvegicus GN=Caskin1 PE=1 SV=1
156		SYVC_RAT	469	140280	1.282	1.56705	1.073	4	Valine--tRNA ligase OS=Rattus norvegicus GN=Vars PE=2 SV=2
163	1	AP180_RAT	438	93460	1.041	1.27246	1.068	4	Clathrin coat assembly protein AP180 OS=Rattus norvegicus GN=Snap91 PE=1 SV=1
116		RL4_RAT	616	47227	1.022	1.24924	1.059	4	60S ribosomal protein L4 OS=Rattus norvegicus GN=Rpl4 PE=1 SV=3
353		SEPT3_RAT	174	40572	0.648	0.792079	1.057	4	Neuronal-specific septin-3 OS=Rattus norvegicus GN=Sept3 PE=1 SV=2
164	2	PYGB_RAT	289	96113	0.9438	1.15365	1.029	4	Glycogen phosphorylase, brain form (Fragment) OS=Rattus norvegicus GN=Pygb PE=1 SV=3
233	1	AAKB2_RAT	307	30208	0.01087	0.0132869	6.833	3	5'-AMP-activated protein kinase subunit beta-2 OS=Rattus norvegicus GN=Prkab2 PE=1 SV=1
509		SYF2_RAT	91	28695	0.08828	0.107909	2.99	3	Pre-mRNA-splicing factor SYF2 OS=Rattus norvegicus GN=Syf2 PE=2 SV=1
295		ODPB_RAT	231	38957	2.369	2.89573	2.405	3	Pyruvate dehydrogenase E1 component subunit beta, mitochondrial OS=Rattus norvegicus GN=Pdhb PE=1 SV=2
18	2	G3PT_RAT	235	46678	0.2401	0.293485	2.034	3	Glyceraldehyde-3-phosphate dehydrogenase, testis-specific OS=Rattus norvegicus GN=Gapdhs PE=1 SV=1
30	5	DPYL5_RAT	227	61501	0.1249	0.152671	2.024	3	Dihydropyrimidinase-related protein 5 OS=Rattus norvegicus GN=Dpysl5 PE=1 SV=1
15	4	HS71A_RAT	702	70142	1.051	1.28468	1.484	3	Heat shock 70 kDa protein 1A OS=Rattus norvegicus GN=Hspa1a PE=2 SV=1
274		LETM1_RAT	254	83008	0.7264	0.887911	1.483	3	LETM1 and EF-hand domain-containing protein 1, mitochondrial OS=Rattus norvegicus GN=Letm1 PE=1 SV=1
1	4	DLG2_RAT	398	94875	0.1484	0.181396	1.431	3	Disks large homolog 2 OS=Rattus norvegicus GN=Dlg2 PE=1 SV=1
228		IMPCT_RAT	311	35972	0.586	0.716294	1.351	3	Protein IMPACT OS=Rattus norvegicus GN=Impact PE=1 SV=1
367		NOP16_RAT	166	21104	1.247	1.52426	1.335	3	Nucleolar protein 16 OS=Rattus norvegicus GN=Nop16 PE=2 SV=1
155		SFXN5_RAT	473	37281	0.2798	0.342012	1.33	3	Sideroflexin-5 OS=Rattus norvegicus GN=Sfxn5 PE=2 SV=1
251		UCRI_RAT	283	29427	0.4787	0.585136	1.316	3	Cytochrome b-c1 complex subunit Rieske, mitochondrial OS=Rattus norvegicus GN=Uqcrfs1 PE=1 SV=2
282		TECR_RAT	246	36099	0.2699	0.329911	1.308	3	Very-long-chain enoyl-CoA reductase OS=Rattus norvegicus GN=Tecr PE=1 SV=1
263		PADI2_RAT	272	75308	1.362	1.66483	1.303	3	Protein-arginine deiminase type-2 OS=Rattus norvegicus GN=Padi2 PE=1 SV=1
392		LPPRC_RAT	150	156554	0.869	1.06222	1.292	3	Leucine-rich PPR motif-containing protein, mitochondrial OS=Rattus norvegicus GN=Lrpprc PE=1 SV=1
278		TAU_RAT	248	78516	0.6077	0.742819	1.273	3	Microtubule-associated protein tau OS=Rattus norvegicus GN=Mapt PE=1 SV=3
154		WASF1_RAT	477	61477	0.5731	0.700526	1.273	3	Wiskott-Aldrich syndrome protein family member 1 OS=Rattus norvegicus GN=Wasf1 PE=1 SV=1
196	3	TRAP1_RAT	225	80411	0.8946	1.09351	1.256	3	Heat shock protein 75 kDa, mitochondrial OS=Rattus norvegicus GN=Trap1 PE=1 SV=1
96	2	DLGP4_RAT	531	107968	0.7575	0.925926	1.253	3	Disks large-associated protein 4 OS=Rattus norvegicus GN=Dlgap4 PE=1 SV=1
194		LGI1_RAT	390	63687	0.1051	0.128468	1.232	3	Leucine-rich glioma-inactivated protein 1 OS=Rattus norvegicus GN=Lgi1 PE=1 SV=1
124		TCP4_RAT	586	14432	1.08	1.32013	1.223	3	Activated RNA polymerase II transcriptional coactivator p15 OS=Rattus norvegicus GN=Sub1 PE=1 SV=3
127		INP5E_RAT	572	72193	0.4492	0.549077	1.209	3	72 kDa inositol polyphosphate 5-phosphatase OS=Rattus norvegicus GN=Inpp5e PE=1 SV=2
225		GTPB1_RAT	314	72443	0.5933	0.725217	1.201	3	GTP-binding protein 1 OS=Rattus norvegicus GN=Gtpbp1 PE=1 SV=1
342		NDRG2_RAT	186	40753	0.5136	0.627796	1.19	3	Protein NDRG2 OS=Rattus norvegicus GN=Ndrg2 PE=1 SV=1
324		MAG_RAT	202	69309	0.6414	0.784012	1.185	3	Myelin-associated glycoprotein OS=Rattus norvegicus GN=Mag PE=1 SV=1
169		SI1L1_RAT	427	201799	0.6563	0.802225	1.182	3	Signal-induced proliferation-associated 1-like protein 1 OS=Rattus norvegicus GN=Sipa1l1 PE=1 SV=1
495		AIMP2_RAT	98	35420	0.9904	1.21061	1.179	3	Aminoacyl tRNA synthase complex-interacting multifunctional protein 2 OS=Rattus norvegicus GN=Aimp2 PE=2 SV=1
244		DGKZ_RAT	292	103943	0.7485	0.914925	1.178	3	Diacylglycerol kinase zeta OS=Rattus norvegicus GN=Dgkz PE=1 SV=1
352		SDHB_RAT	175	31809	0.3157	0.385894	1.176	3	Succinate dehydrogenase [ubiquinone] iron-sulfur subunit, mitochondrial OS=Rattus norvegicus GN=Sdhb PE=2 SV=2
211	1	PI51A_RAT	335	60567	0.4503	0.550422	1.171	3	Phosphatidylinositol 4-phosphate 5-kinase type-1 alpha OS=Rattus norvegicus GN=Pip5k1a PE=2 SV=1
259	2	BIN1_RAT	225	64493	0.9475	1.15817	1.154	3	Myc box-dependent-interacting protein 1 OS=Rattus norvegicus GN=Bin1 PE=1 SV=1
234		DDX21_RAT	306	85913	1.191	1.45581	1.145	3	Nucleolar RNA helicase 2 OS=Rattus norvegicus GN=Ddx21 PE=2 SV=1
231		ALDOA_RAT	308	39327	0.6788	0.829727	1.142	3	Fructose-bisphosphate aldolase A OS=Rattus norvegicus GN=Aldoa PE=1 SV=2
184		EAA1_RAT	405	59659	0.3609	0.441144	1.14	3	Excitatory amino acid transporter 1 OS=Rattus norvegicus GN=Slc1a3 PE=1 SV=2
137		MFF_RAT	540	24955	0.9265	1.1325	1.134	3	Mitochondrial fission factor OS=Rattus norvegicus GN=Mff PE=1 SV=1
107	1	ITPR1_RAT	659	313065	1.36	1.66239	1.13	3	Inositol 1,4,5-trisphosphate receptor type 1 OS=Rattus norvegicus GN=Itpr1 PE=1 SV=2
372		GPX1_RAT	163	22292	1.364	1.66728	1.128	3	Glutathione peroxidase 1 OS=Rattus norvegicus GN=Gpx1 PE=1 SV=4
343		NECA1_RAT	184	40878	0.4007	0.489793	1.128	3	N-terminal EF-hand calcium-binding protein 1 OS=Rattus norvegicus GN=Necab1 PE=1 SV=1
457		EIF3I_RAT	115	36438	1.1	1.34458	1.114	3	Eukaryotic translation initiation factor 3 subunit I OS=Rattus norvegicus GN=Eif3i PE=2 SV=1
136	1	EF1A2_RAT	548	50422	0.6213	0.759443	1.112	3	Elongation factor 1-alpha 2 OS=Rattus norvegicus GN=Eef1a2 PE=1 SV=1
93		SRSF2_RAT	728	25461	1.513	1.84941	1.111	3	Serine/arginine-rich splicing factor 2 OS=Rattus norvegicus GN=Srsf2 PE=1 SV=3
564		AAKG1_RAT	73	37363	0.3425	0.418653	1.104	3	5'-AMP-activated protein kinase subunit gamma-1 OS=Rattus norvegicus GN=Prkag1 PE=1 SV=3
308		MYPR_RAT	213	30057	0.6118	0.74783	1.102	3	Myelin proteolipid protein OS=Rattus norvegicus GN=Plp1 PE=1 SV=2
205		RL24_RAT	346	17768	0.7606	0.929715	1.089	3	60S ribosomal protein L24 OS=Rattus norvegicus GN=Rpl24 PE=2 SV=1
206		BCAS1_RAT	342	58588	0.5714	0.698448	1.086	3	Breast carcinoma-amplified sequence 1 homolog (Fragment) OS=Rattus norvegicus GN=Bcas1 PE=1 SV=2
536		HNRPL_RAT	82	67860	0.623	0.761521	1.076	3	Heterogeneous nuclear ribonucleoprotein L OS=Rattus norvegicus GN=Hnrnpl PE=1 SV=2
306		CTND2_RAT	214	28910	1.113	1.36047	1.062	3	Catenin delta-2 (Fragment) OS=Rattus norvegicus GN=Ctnnd2 PE=1 SV=1
210	2	PP1A_RAT	249	37488	0.8589	1.04987	1.059	3	Serine/threonine-protein phosphatase PP1-alpha catalytic subunit OS=Rattus norvegicus GN=Ppp1ca PE=1 SV=1
79		EPS8_RAT	847	91871	0.7683	0.939127	1.058	3	Epidermal growth factor receptor kinase substrate 8 OS=Rattus norvegicus GN=Eps8 PE=1 SV=2
210	1	PP1B_RAT	336	37163	0.8827	1.07896	1.053	3	Serine/threonine-protein phosphatase PP1-beta catalytic subunit OS=Rattus norvegicus GN=Ppp1cb PE=1 SV=3
171		STAU2_RAT	424	62642	0.447	0.546388	1.038	3	Double-stranded RNA-binding protein Staufen homolog 2 OS=Rattus norvegicus GN=Stau2 PE=1 SV=1
408	2	PRDX1_RAT	107	22095	0.388	0.47427	1.033	3	Peroxiredoxin-1 OS=Rattus norvegicus GN=Prdx1 PE=1 SV=1
179	3	KPCD_RAT	154	77470	0.8721	1.06601	1.027	3	Protein kinase C delta type OS=Rattus norvegicus GN=Prkcd PE=1 SV=1
204		DGKB_RAT	353	90229	0.6384	0.780345	1.024	3	Diacylglycerol kinase beta OS=Rattus norvegicus GN=Dgkb PE=1 SV=1
190		PRC2A_RAT	398	228908	0.9853	1.20438	1.01	3	Protein PRRC2A OS=Rattus norvegicus GN=Prrc2a PE=1 SV=1
337		SIN1_RAT	191	59006	2028000	2.47891e+06	48660	2	Target of rapamycin complex 2 subunit MAPKAP1 OS=Rattus norvegicus GN=Mapkap1 PE=2 SV=1
120		LONM_RAT	603	105726	0.03673	0.0448967	27.9	2	Lon protease homolog, mitochondrial OS=Rattus norvegicus GN=Lonp1 PE=2 SV=1
403		RAB14_RAT	143	23912	7.54	9.21648	7.171	2	Ras-related protein Rab-14 OS=Rattus norvegicus GN=Rab14 PE=1 SV=3
433		C1QBP_RAT	127	30978	0.006711	0.00820315	6.556	2	Complement component 1 Q subcomponent-binding protein, mitochondrial OS=Rattus norvegicus GN=C1qbp PE=1 SV=2
135		PLAK_RAT	549	81749	0.0983	0.120156	5.292	2	Junction plakoglobin OS=Rattus norvegicus GN=Jup PE=1 SV=1
380		BACH_RAT	159	42708	0.1879	0.229679	2.153	2	Cytosolic acyl coenzyme A thioester hydrolase OS=Rattus norvegicus GN=Acot7 PE=1 SV=4
448		TERA_RAT	118	89293	0.4741	0.579514	2.072	2	Transitional endoplasmic reticulum ATPase OS=Rattus norvegicus GN=Vcp PE=1 SV=3
183	1	SYN2_RAT	406	63417	0.8778	1.07297	1.963	2	Synapsin-2 OS=Rattus norvegicus GN=Syn2 PE=1 SV=1
419	1	RB6I2_RAT	132	108751	3.461	4.23053	1.927	2	ELKS/Rab6-interacting/CAST family member 1 OS=Rattus norvegicus GN=Erc1 PE=1 SV=1
871		PLEC_RAT	25	533214	1.165	1.42403	1.919	2	Plectin OS=Rattus norvegicus GN=Plec PE=1 SV=2
183	2	SYN1_RAT	382	73943	1.354	1.65505	1.841	2	Synapsin-1 OS=Rattus norvegicus GN=Syn1 PE=1 SV=3
63	2	AP1B1_RAT	503	104522	4.039	4.93705	1.772	2	AP-1 complex subunit beta-1 OS=Rattus norvegicus GN=Ap1b1 PE=1 SV=1
362		TOM70_RAT	171	67402	0.5154	0.629996	1.699	2	Mitochondrial import receptor subunit TOM70 OS=Rattus norvegicus GN=Tomm70 PE=1 SV=1
152		DDX46_RAT	491	117313	1.552	1.89708	1.61	2	Probable ATP-dependent RNA helicase DDX46 OS=Rattus norvegicus GN=Ddx46 PE=1 SV=1
88	2	LIPA4_RAT	554	117931	1.041	1.27246	1.494	2	Liprin-alpha-4 (Fragment) OS=Rattus norvegicus GN=Ppfia4 PE=1 SV=1
462		ECI2_RAT	112	42994	0.5332	0.651754	1.478	2	Enoyl-CoA delta isomerase 2, mitochondrial OS=Rattus norvegicus GN=Eci2 PE=1 SV=1
500		NDUF6_RAT	96	38491	0.1404	0.171617	1.461	2	NADH dehydrogenase (ubiquinone) complex I, assembly factor 6 OS=Rattus norvegicus GN=Ndufaf6 PE=3 SV=1
131		ASGL1_RAT	554	34389	0.5015	0.613006	1.447	2	Isoaspartyl peptidase/L-asparaginase OS=Rattus norvegicus GN=Asrgl1 PE=1 SV=1
750		CXA1_RAT	36	43004	1.136	1.38858	1.43	2	Gap junction alpha-1 protein OS=Rattus norvegicus GN=Gja1 PE=1 SV=2
399		ERMIN_RAT	146	32208	0.287	0.350813	1.412	2	Ermin OS=Rattus norvegicus GN=Ermn PE=1 SV=1
520		CCD50_RAT	88	35137	1.152	1.40814	1.411	2	Coiled-coil domain-containing protein 50 OS=Rattus norvegicus GN=Ccdc50 PE=2 SV=1
379		PPR1B_RAT	159	22899	0.5657	0.69148	1.387	2	Protein phosphatase 1 regulatory subunit 1B OS=Rattus norvegicus GN=Ppp1r1b PE=1 SV=1
240		GEPH_RAT	296	83213	0.9073	1.10903	1.382	2	Gephyrin OS=Rattus norvegicus GN=Gphn PE=1 SV=3
96	3	DLGP3_RAT	111	105925	0.5105	0.624007	1.358	2	Disks large-associated protein 3 OS=Rattus norvegicus GN=Dlgap3 PE=1 SV=2
200	1	KIF1B_RAT	365	204042	0.9628	1.17687	1.34	2	Kinesin-like protein KIF1B OS=Rattus norvegicus GN=Kif1b PE=1 SV=2
373		ODPA_RAT	163	43199	0.2867	0.350446	1.334	2	Pyruvate dehydrogenase E1 component subunit alpha, somatic form, mitochondrial OS=Rattus norvegicus GN=Pdha1 PE=1 SV=2
180		NDUA9_RAT	409	42532	0.4337	0.530131	1.318	2	NADH dehydrogenase [ubiquinone] 1 alpha subcomplex subunit 9, mitochondrial OS=Rattus norvegicus GN=Ndufa9 PE=1 SV=2
302		SEPT9_RAT	223	63752	0.56	0.684513	1.305	2	Septin-9 OS=Rattus norvegicus GN=Sept9 PE=1 SV=1
354		NMDE2_RAT	174	165965	0.8335	1.01882	1.298	2	Glutamate receptor ionotropic, NMDA 2B OS=Rattus norvegicus GN=Grin2b PE=1 SV=1
253		ACLY_RAT	282	120559	1.051	1.28468	1.294	2	ATP-citrate synthase OS=Rattus norvegicus GN=Acly PE=1 SV=1
428		MOES_RAT	128	67697	0.322	0.393595	1.271	2	Moesin OS=Rattus norvegicus GN=Msn PE=1 SV=3
406		RL11_RAT	141	20240	0.6728	0.822393	1.247	2	60S ribosomal protein L11 OS=Rattus norvegicus GN=Rpl11 PE=1 SV=2
366	3	KIF5A_RAT	67	116843	0.9056	1.10696	1.24	2	Kinesin heavy chain isoform 5A OS=Rattus norvegicus GN=Kif5a PE=1 SV=1
366	1	KINH_RAT	168	109463	0.9056	1.10696	1.24	2	Kinesin-1 heavy chain OS=Rattus norvegicus GN=Kif5b PE=1 SV=1
677		HNRDL_RAT	48	35272	0.8941	1.0929	1.232	2	Heterogeneous nuclear ribonucleoprotein D-like OS=Rattus norvegicus GN=Hnrnpdl PE=1 SV=1
410		SAHH2_RAT	137	53719	0.3486	0.426109	1.23	2	Adenosylhomocysteinase 2 OS=Rattus norvegicus GN=Ahcyl1 PE=1 SV=2
319		ODP2_RAT	206	67123	0.8018	0.980076	1.223	2	Dihydrolipoyllysine-residue acetyltransferase component of pyruvate dehydrogenase complex, mitochondrial OS=Rattus norvegicus GN=Dlat PE=1 SV=3
200	2	KIF1C_RAT	93	122258	0.8339	1.01931	1.211	2	Kinesin-like protein KIF1C OS=Rattus norvegicus GN=Kif1c PE=1 SV=1
283		CSKP_RAT	243	103193	0.03795	0.046388	1.206	2	Peripheral plasma membrane protein CASK OS=Rattus norvegicus GN=Cask PE=1 SV=1
299		RS27A_RAT	229	17939	1.072	1.31035	1.2	2	Ubiquitin-40S ribosomal protein S27a OS=Rattus norvegicus GN=Rps27a PE=1 SV=2
221		SGIP1_RAT	316	88530	0.7014	0.857352	1.197	2	SH3-containing GRB2-like protein 3-interacting protein 1 OS=Rattus norvegicus GN=Sgip1 PE=1 SV=1
390		MDHM_RAT	151	35661	0.686	0.838528	1.194	2	Malate dehydrogenase, mitochondrial OS=Rattus norvegicus GN=Mdh2 PE=1 SV=2
196	2	HS90A_RAT	353	84762	1.108	1.35436	1.193	2	Heat shock protein HSP 90-alpha OS=Rattus norvegicus GN=Hsp90aa1 PE=1 SV=3
430		RL26_RAT	128	17267	0.5625	0.687569	1.19	2	60S ribosomal protein L26 OS=Rattus norvegicus GN=Rpl26 PE=1 SV=1
698		IF4E_RAT	43	25037	0.7337	0.896834	1.187	2	Eukaryotic translation initiation factor 4E OS=Rattus norvegicus GN=Eif4e PE=1 SV=1
645		CEND_RAT	55	15034	0.5072	0.619973	1.183	2	Cell cycle exit and neuronal differentiation protein 1 OS=Rattus norvegicus GN=Cend1 PE=1 SV=1
24	3	DCX_RAT	207	40534	0.4385	0.535998	1.183	2	Neuronal migration protein doublecortin OS=Rattus norvegicus GN=Dcx PE=1 SV=2
272		ARM10_RAT	255	33401	0.1179	0.144114	1.181	2	Armadillo repeat-containing protein 10 OS=Rattus norvegicus GN=Armc10 PE=1 SV=1
436		LASP1_RAT	126	29951	0.6669	0.815182	1.181	2	LIM and SH3 domain protein 1 OS=Rattus norvegicus GN=Lasp1 PE=1 SV=1
464		SYPH_RAT	112	33289	0.6345	0.775578	1.178	2	Synaptophysin OS=Rattus norvegicus GN=Syp PE=1 SV=1
229		ABCF1_RAT	310	95193	1.201	1.46804	1.157	2	ATP-binding cassette sub-family F member 1 OS=Rattus norvegicus GN=Abcf1 PE=1 SV=1
322		ALBU_RAT	205	68686	0.8371	1.02322	1.155	2	Serum albumin OS=Rattus norvegicus GN=Alb PE=1 SV=2
409	1	RTN1_RAT	138	82951	1.018	1.24435	1.149	2	Reticulon-1 OS=Rattus norvegicus GN=Rtn1 PE=1 SV=1
351		MBB1A_RAT	179	152191	1.268	1.54993	1.148	2	Myb-binding protein 1A OS=Rattus norvegicus GN=Mybbp1a PE=1 SV=2
192	1	ACSL3_RAT	391	80406	0.08695	0.106283	1.146	2	Long-chain-fatty-acid--CoA ligase 3 OS=Rattus norvegicus GN=Acsl3 PE=1 SV=1
553		H15_RAT	77	22635	0.9602	1.1737	1.145	2	Histone H1.5 OS=Rattus norvegicus GN=Hist1h1b PE=1 SV=1
117	2	GNAI1_RAT	296	40319	0.461	0.563501	1.136	2	Guanine nucleotide-binding protein G(i) subunit alpha-1 OS=Rattus norvegicus GN=Gnai1 PE=1 SV=3
578		RL35_RAT	69	14544	0.8988	1.09864	1.133	2	60S ribosomal protein L35 OS=Rattus norvegicus GN=Rpl35 PE=1 SV=3
563		GP158_RAT	73	134374	0.5079	0.620829	1.128	2	Probable G-protein coupled receptor 158 OS=Rattus norvegicus GN=Gpr158 PE=1 SV=1
421		GPM6A_RAT	132	31174	0.7443	0.909791	1.122	2	Neuronal membrane glycoprotein M6-a OS=Rattus norvegicus GN=Gpm6a PE=1 SV=1
440		ZFR_RAT	124	116745	1.237	1.51204	1.121	2	Zinc finger RNA-binding protein OS=Rattus norvegicus GN=Zfr PE=1 SV=2
132		IRS1_RAT	553	131096	0.388	0.47427	1.102	2	Insulin receptor substrate 1 OS=Rattus norvegicus GN=Irs1 PE=1 SV=1
201		NAC2_RAT	361	100459	0.4915	0.600782	1.099	2	Sodium/calcium exchanger 2 OS=Rattus norvegicus GN=Slc8a2 PE=1 SV=1
254		RL21_RAT	280	18454	0.6922	0.846107	1.092	2	60S ribosomal protein L21 OS=Rattus norvegicus GN=Rpl21 PE=1 SV=3
391		S6A11_RAT	150	69900	0.3688	0.450801	1.089	2	Sodium- and chloride-dependent GABA transporter 3 OS=Rattus norvegicus GN=Slc6a11 PE=1 SV=1
432	1	RL28_RAT	127	15839	0.7235	0.884366	1.08	2	60S ribosomal protein L28 OS=Rattus norvegicus GN=Rpl28 PE=1 SV=4
347		MAGD1_RAT	182	85745	1.015	1.24068	1.078	2	Melanoma-associated antigen D1 OS=Rattus norvegicus GN=Maged1 PE=1 SV=3
400		PLCB1_RAT	146	138257	0.9664	1.18127	1.076	2	1-phosphatidylinositol 4,5-bisphosphate phosphodiesterase beta-1 OS=Rattus norvegicus GN=Plcb1 PE=1 SV=1
690		CALB1_RAT	45	29975	0.6313	0.771666	1.072	2	Calbindin OS=Rattus norvegicus GN=Calb1 PE=1 SV=2
463		GBB5_RAT	112	38707	0.6347	0.775822	1.07	2	Guanine nucleotide-binding protein subunit beta-5 OS=Rattus norvegicus GN=Gnb5 PE=2 SV=1
653		RYDEN_RAT	54	18852	0.9278	1.13409	1.067	2	Repressor of yield of DENV protein homolog OS=Rattus norvegicus GN=Ryden PE=2 SV=1
815		SRR_RAT	29	35671	0.6578	0.804058	1.063	2	Serine racemase OS=Rattus norvegicus GN=Srr PE=1 SV=1
117	4	GNAI2_RAT	259	40473	0.5892	0.720205	1.06	2	Guanine nucleotide-binding protein G(i) subunit alpha-2 OS=Rattus norvegicus GN=Gnai2 PE=1 SV=3
210	3	PP1G_RAT	189	36960	0.8637	1.05574	1.056	2	Serine/threonine-protein phosphatase PP1-gamma catalytic subunit OS=Rattus norvegicus GN=Ppp1cc PE=1 SV=1
275	1	HSDL1_RAT	254	36884	0.2532	0.309498	1.054	2	Inactive hydroxysteroid dehydrogenase-like protein 1 OS=Rattus norvegicus GN=Hsdl1 PE=2 SV=1
345		TFAM_RAT	183	28169	1.406	1.71862	1.051	2	Transcription factor A, mitochondrial OS=Rattus norvegicus GN=Tfam PE=2 SV=1
397		CAH2_RAT	146	29096	1.132	1.38369	1.049	2	Carbonic anhydrase 2 OS=Rattus norvegicus GN=Ca2 PE=1 SV=2
179	2	KPCB_RAT	387	76701	0.8732	1.06735	1.049	2	Protein kinase C beta type OS=Rattus norvegicus GN=Prkcb PE=1 SV=3
331		PSMD2_RAT	195	100124	0.4623	0.56509	1.042	2	26S proteasome non-ATPase regulatory subunit 2 OS=Rattus norvegicus GN=Psmd2 PE=1 SV=1
307		NEDD4_RAT	214	102331	0.6787	0.829605	1.04	2	E3 ubiquitin-protein ligase NEDD4 OS=Rattus norvegicus GN=Nedd4 PE=1 SV=1
175	1	HXK1_RAT	418	102342	1.38	1.68684	1.035	2	Hexokinase-1 OS=Rattus norvegicus GN=Hk1 PE=1 SV=4
193		CPT1A_RAT	390	88069	0.7412	0.906002	1.033	2	Carnitine O-palmitoyltransferase 1, liver isoform OS=Rattus norvegicus GN=Cpt1a PE=1 SV=2
316		EXOC4_RAT	208	110483	1.19	1.45459	1.031	2	Exocyst complex component 4 OS=Rattus norvegicus GN=Exoc4 PE=1 SV=1
450		ARFG3_RAT	118	57635	0.6845	0.836695	1.027	2	ADP-ribosylation factor GTPase-activating protein 3 OS=Rattus norvegicus GN=Arfgap3 PE=1 SV=1
112		NCDN_RAT	633	78873	1.024	1.25168	1.017	2	Neurochondrin OS=Rattus norvegicus GN=Ncdn PE=1 SV=2
365		TOP1_RAT	169	90703	0.9053	1.10659	1.013	2	DNA topoisomerase 1 OS=Rattus norvegicus GN=Top1 PE=1 SV=1
565		DNA2_RAT	73	119512	1.08	1.32013	1.011	2	DNA replication ATP-dependent helicase/nuclease DNA2 OS=Rattus norvegicus GN=Dna2 PE=3 SV=1
447		RL18A_RAT	119	20719	0.6176	0.75492	1.004	2	60S ribosomal protein L18a OS=Rattus norvegicus GN=Rpl18a PE=2 SV=1
277		PAK5_RAT	251	80898	0.8774	1.07249	1.001	2	Serine/threonine-protein kinase PAK 5 OS=Rattus norvegicus GN=Pak5 PE=1 SV=1

## Sheet: B filtered
				Median:	0.6713
Accession	Hit numer	Member	Score	Mass	Heavy/Light Ratio	H/L Ratio Norm.	Standard deviation	pep count #	Description
ZFR_RAT	616		57	116745	1.218	1.81439	1.071	2	Zinc finger RNA-binding protein OS=Rattus norvegicus GN=Zfr PE=1 SV=2
WASF1_RAT	162		423	61477	0.4825	0.718755	1.282	3	Wiskott-Aldrich syndrome protein family member 1 OS=Rattus norvegicus GN=Wasf1 PE=1 SV=1
WDR7_RAT	68		857	163086	0.6295	0.937733	1.074	15	WD repeat-containing protein 7 OS=Rattus norvegicus GN=Wdr7 PE=1 SV=1
KCAB2_RAT	231		292	40995	0.6178	0.920304	2.488	2	Voltage-gated potassium channel subunit beta-2 OS=Rattus norvegicus GN=Kcnab2 PE=1 SV=1
VDAC3_RAT	213	2	289	30778	0.6047	0.90079	1.305	3	Voltage-dependent anion-selective channel protein 3 OS=Rattus norvegicus GN=Vdac3 PE=1 SV=2
VDAC2_RAT	213	1	311	31726	0.5916	0.881275	1.178	7	Voltage-dependent anion-selective channel protein 2 OS=Rattus norvegicus GN=Vdac2 PE=1 SV=2
VDAC1_RAT	204		319	30737	0.7449	1.10964	1.069	4	Voltage-dependent anion-selective channel protein 1 OS=Rattus norvegicus GN=Vdac1 PE=1 SV=4
VIGLN_RAT	101		654	141496	1.066	1.58796	1.067	13	Vigilin OS=Rattus norvegicus GN=Hdlbp PE=1 SV=1
NSF_RAT	31		1464	82600	0.5207	0.775659	1.048	34	Vesicle-fusing ATPase OS=Rattus norvegicus GN=Nsf PE=1 SV=1
VAPA_RAT	222	1	301	27823	0.4385	0.65321	1.436	2	Vesicle-associated membrane protein-associated protein A OS=Rattus norvegicus GN=Vapa PE=1 SV=3
TECR_RAT	246		271	36099	0.2345	0.349322	1.235	5	Very-long-chain enoyl-CoA reductase OS=Rattus norvegicus GN=Tecr PE=1 SV=1
ACADV_RAT	318		195	70705	7279	10843.1	659.7	2	Very long-chain specific acyl-CoA dehydrogenase, mitochondrial OS=Rattus norvegicus GN=Acadvl PE=1 SV=1
SYVC_RAT	199		329	140280	1.187	1.76821	1.141	4	Valine--tRNA ligase OS=Rattus norvegicus GN=Vars PE=2 SV=2
MYO5A_RAT	41		1244	211630	0.808	1.20363	1.055	15	Unconventional myosin-Va OS=Rattus norvegicus GN=Myo5a PE=1 SV=1
RS27A_RAT	236		288	17939	0.8189	1.21987	1.281	2	Ubiquitin-40S ribosomal protein S27a OS=Rattus norvegicus GN=Rps27a PE=1 SV=2
UBP46_RAT	278		235	42388	0.2442	0.363772	1.351	2	Ubiquitin carboxyl-terminal hydrolase 46 OS=Rattus norvegicus GN=Usp46 PE=1 SV=2
UBP10_RAT	85		735	87257	0.9234	1.37554	1.371	11	Ubiquitin carboxyl-terminal hydrolase 10 OS=Rattus norvegicus GN=Usp10 PE=1 SV=1
SYYC_RAT	139		492	59078	0.4943	0.736332	1.081	6	Tyrosine--tRNA ligase, cytoplasmic OS=Rattus norvegicus GN=Yars PE=2 SV=3
INP4A_RAT	83		749	105522	0.4631	0.689856	1.399	4	Type I inositol 3,4-bisphosphate 4-phosphatase OS=Rattus norvegicus GN=Inpp4a PE=1 SV=1
TDRD3_RAT	390		141	72983	0.7981	1.18889	1.165	3	Tudor domain-containing protein 3 OS=Rattus norvegicus GN=Tdrd3 PE=1 SV=1
TBB5_RAT	15	3	1790	49639	0.3622	0.53955	1.345	3	Tubulin beta-5 chain OS=Rattus norvegicus GN=Tubb5 PE=1 SV=1
TBB4B_RAT	15	2	2098	49769	0.3223	0.480113	1.16	3	Tubulin beta-4B chain OS=Rattus norvegicus GN=Tubb4b PE=1 SV=1
TBB3_RAT	15	4	1662	50386	0.4179	0.622523	1.447	3	Tubulin beta-3 chain OS=Rattus norvegicus GN=Tubb3 PE=1 SV=1
TBB2B_RAT	15	1	2348	49921	0.3082	0.459109	1.275	6	Tubulin beta-2B chain OS=Rattus norvegicus GN=Tubb2b PE=1 SV=1
TBA4A_RAT	13	2	969	49892	0.3899	0.580813	1.186	3	Tubulin alpha-4A chain OS=Rattus norvegicus GN=Tuba4a PE=1 SV=1
TBA1A_RAT	13	1	2382	50104	0.4121	0.613884	1.159	5	Tubulin alpha-1A chain OS=Rattus norvegicus GN=Tuba1a PE=1 SV=1
TRIO_RAT	230		293	347642	0.5975	0.890064	1.156	3	Triple functional domain protein OS=Rattus norvegicus GN=Trio PE=1 SV=4
TRIM3_RAT	161	1	430	80745	0.7935	1.18203	1.043	7	Tripartite motif-containing protein 3 OS=Rattus norvegicus GN=Trim3 PE=1 SV=1
TPIS_RAT	140		489	26832	0.8204	1.22211	1.286	7	Triosephosphate isomerase OS=Rattus norvegicus GN=Tpi1 PE=1 SV=2
ECHA_RAT	54		1000	82613	0.4472	0.66617	1.055	12	Trifunctional enzyme subunit alpha, mitochondrial OS=Rattus norvegicus GN=Hadha PE=1 SV=2
TXTP_RAT	109		617	33814	0.1243	0.185163	1.129	7	Tricarboxylate transport protein, mitochondrial OS=Rattus norvegicus GN=Slc25a1 PE=1 SV=1
TERA_RAT	425		119	89293	0.9636	1.43542	2.118	3	Transitional endoplasmic reticulum ATPase OS=Rattus norvegicus GN=Vcp PE=1 SV=3
PURB_RAT	67		866	33398	0.6608	0.984359	1.337	12	Transcriptional activator protein Pur-beta OS=Rattus norvegicus GN=Purb PE=1 SV=3
PURA_RAT	89		714	15313	0.6396	0.952778	1.134	6	Transcriptional activator protein Pur-alpha (Fragments) OS=Rattus norvegicus GN=Pura PE=1 SV=1
TFAM_RAT	415		124	28169	0.863	1.28557	1.042	2	Transcription factor A, mitochondrial OS=Rattus norvegicus GN=Tfam PE=2 SV=1
TENR_RAT	95		670	149277	1.237	1.84269	1.29	4	Tenascin-R OS=Rattus norvegicus GN=Tnr PE=1 SV=1
SIN1_RAT	323		192	59006	678500	1.01073e+06	25660	2	Target of rapamycin complex 2 subunit MAPKAP1 OS=Rattus norvegicus GN=Mapkap1 PE=2 SV=1
STXB1_RAT	158		435	67526	0.1922	0.28631	1.235	4	Syntaxin-binding protein 1 OS=Rattus norvegicus GN=Stxbp1 PE=1 SV=1
SNPH_RAT	233		291	54460	0.7216	1.07493	1.11	3	Syntaphilin OS=Rattus norvegicus GN=Snph PE=1 SV=1
SYTL5_RAT	149		457	83593	0.8671	1.29167	1.147	5	Synaptotagmin-like protein 5 OS=Rattus norvegicus GN=Sytl5 PE=2 SV=1
SNP25_RAT	155		448	23300	0.4615	0.687472	1.121	6	Synaptosomal-associated protein 25 OS=Rattus norvegicus GN=Snap25 PE=1 SV=1
SYNPO_RAT	172		380	99924	0.6691	0.996723	1.13	7	Synaptopodin OS=Rattus norvegicus GN=Synpo PE=1 SV=2
SYNJ1_RAT	92		685	172773	0.7405	1.10308	1.015	11	Synaptojanin-1 OS=Rattus norvegicus GN=Synj1 PE=1 SV=3
SV2A_RAT	111		607	82608	0.4425	0.659169	1.185	7	Synaptic vesicle glycoprotein 2A OS=Rattus norvegicus GN=Sv2a PE=1 SV=2
FMR1_RAT	70	1	831	66740	0.9776	1.45628	1.076	11	Synaptic functional regulator FMR1 OS=Rattus norvegicus GN=Fmr1 PE=1 SV=2
SYN1_RAT	102	1	653	73943	0.4933	0.734843	1.384	4	Synapsin-1 OS=Rattus norvegicus GN=Syn1 PE=1 SV=3
SDHB_RAT	315		200	31809	0.2396	0.356919	1.608	2	Succinate dehydrogenase [ubiquinone] iron-sulfur subunit, mitochondrial OS=Rattus norvegicus GN=Sdhb PE=2 SV=2
SDHA_RAT	138		497	71570	0.3532	0.526143	1.098	8	Succinate dehydrogenase [ubiquinone] flavoprotein subunit, mitochondrial OS=Rattus norvegicus GN=Sdha PE=1 SV=1
GRP75_RAT	58		968	73812	0.6274	0.934604	1.062	16	Stress-70 protein, mitochondrial OS=Rattus norvegicus GN=Hspa9 PE=1 SV=3
SND1_RAT	59		945	101888	0.8529	1.27052	1.073	10	Staphylococcal nuclease domain-containing protein 1 OS=Rattus norvegicus GN=Snd1 PE=1 SV=1
SRC8_RAT	164		422	56907	0.8541	1.27231	1.085	6	Src substrate cortactin OS=Rattus norvegicus GN=Cttn PE=1 SV=1
SRCN1_RAT	10		3803	129665	0.4367	0.650529	1.069	38	SRC kinase signaling inhibitor 1 OS=Rattus norvegicus GN=Srcin1 PE=1 SV=1
SPTN2_RAT	52		1004	270897	0.8407	1.25235	1.113	6	Spectrin beta chain, non-erythrocytic 2 OS=Rattus norvegicus GN=Sptbn2 PE=1 SV=2
SPTN1_RAT	12	1	2903	284462	0.8473	1.26218	1.026	38	Spectrin alpha chain, non-erythrocytic 1 OS=Rattus norvegicus GN=Sptan1 PE=1 SV=2
SPS2L_RAT	304		212	61736	0.7198	1.07225	1.244	2	SPATS2-like protein OS=Rattus norvegicus GN=Spats2l PE=2 SV=1
SORT_RAT	197		332	91111	0.05136	0.0765083	1.646	4	Sortilin OS=Rattus norvegicus GN=Sort1 PE=1 SV=3
S12A5_RAT	77		803	126165	0.571	0.850588	1.042	10	Solute carrier family 12 member 5 OS=Rattus norvegicus GN=Slc12a5 PE=1 SV=2
AT1A4_RAT	11	4	485	113932	0.599	0.892299	1.112	5	Sodium/potassium-transporting ATPase subunit alpha-4 OS=Rattus norvegicus GN=Atp1a4 PE=2 SV=1
AT1A3_RAT	11	1	3412	111620	0.6822	1.01624	1.061	27	Sodium/potassium-transporting ATPase subunit alpha-3 OS=Rattus norvegicus GN=Atp1a3 PE=1 SV=2
AT1A2_RAT	11	2	3055	112145	0.6971	1.03843	1.07	24	Sodium/potassium-transporting ATPase subunit alpha-2 OS=Rattus norvegicus GN=Atp1a2 PE=1 SV=1
AT1A1_RAT	11	3	2890	112982	0.6977	1.03933	1.086	22	Sodium/potassium-transporting ATPase subunit alpha-1 OS=Rattus norvegicus GN=Atp1a1 PE=1 SV=1
SFXN5_RAT	165		417	37281	0.2438	0.363176	1.327	5	Sideroflexin-5 OS=Rattus norvegicus GN=Sfxn5 PE=2 SV=1
SFXN3_RAT	72	1	825	35411	0.1553	0.231342	1.127	11	Sideroflexin-3 OS=Rattus norvegicus GN=Sfxn3 PE=2 SV=1
SGIP1_RAT	326		188	88530	0.6369	0.948756	1.108	2	SH3-containing GRB2-like protein 3-interacting protein 1 OS=Rattus norvegicus GN=Sgip1 PE=1 SV=1
ALBU_RAT	218		308	68686	0.6748	1.00521	1.123	2	Serum albumin OS=Rattus norvegicus GN=Alb PE=1 SV=2
PP1G_RAT	247	3	132	36960	0.7056	1.05109	1.207	2	Serine/threonine-protein phosphatase PP1-gamma catalytic subunit OS=Rattus norvegicus GN=Ppp1cc PE=1 SV=1
PP1B_RAT	247	1	271	37163	0.6966	1.03769	1.181	4	Serine/threonine-protein phosphatase PP1-beta catalytic subunit OS=Rattus norvegicus GN=Ppp1cb PE=1 SV=3
PP1A_RAT	247	2	165	37488	0.7056	1.05109	1.207	2	Serine/threonine-protein phosphatase PP1-alpha catalytic subunit OS=Rattus norvegicus GN=Ppp1ca PE=1 SV=1
PGAM5_RAT	343		173	32041	0.607	0.904216	1.122	3	Serine/threonine-protein phosphatase PGAM5, mitochondrial OS=Rattus norvegicus GN=Pgam5 PE=2 SV=1
PP2BB_RAT	117	2	483	59076	0.2476	0.368837	1.078	6	Serine/threonine-protein phosphatase 2B catalytic subunit beta isoform OS=Rattus norvegicus GN=Ppp3cb PE=1 SV=1
PP2BA_RAT	117	1	560	58606	0.2514	0.374497	1.124	6	Serine/threonine-protein phosphatase 2B catalytic subunit alpha isoform OS=Rattus norvegicus GN=Ppp3ca PE=1 SV=1
PP2AB_RAT	435		115	35552	0.6318	0.941159	1.781	2	Serine/threonine-protein phosphatase 2A catalytic subunit beta isoform OS=Rattus norvegicus GN=Ppp2cb PE=2 SV=1
MARK2_RAT	24	1	1668	80821	0.5992	0.892596	1.135	18	Serine/threonine-protein kinase MARK2 OS=Rattus norvegicus GN=Mark2 PE=1 SV=1
MARK1_RAT	24	3	738	88180	0.8443	1.25771	1.052	12	Serine/threonine-protein kinase MARK1 OS=Rattus norvegicus GN=Mark1 PE=1 SV=1
DCLK2_RAT	16	1	2092	83964	0.2549	0.379711	1.106	19	Serine/threonine-protein kinase DCLK2 OS=Rattus norvegicus GN=Dclk2 PE=1 SV=2
DCLK1_RAT	16	2	1296	47651	0.2837	0.422613	1.196	16	Serine/threonine-protein kinase DCLK1 OS=Rattus norvegicus GN=Dclk1 PE=1 SV=1
BRSK2_RAT	34	2	327	81403	0.3018	0.449575	1.085	8	Serine/threonine-protein kinase BRSK2 OS=Rattus norvegicus GN=Brsk2 PE=1 SV=1
BRSK1_RAT	34	1	1418	85130	0.2873	0.427976	1.072	23	Serine/threonine-protein kinase BRSK1 OS=Rattus norvegicus GN=Brsk1 PE=1 SV=1
SRSF2_RAT	146		470	25461	1.033	1.53881	1.157	3	Serine/arginine-rich splicing factor 2 OS=Rattus norvegicus GN=Srsf2 PE=1 SV=3
SEPT5_RAT	286		231	42825	0.4247	0.632653	1.042	5	Septin-5 OS=Rattus norvegicus GN=Sept5 PE=1 SV=2
SAFB1_RAT	546		74	104504	1.918	2.85714	1.077	2	Scaffold attachment factor B1 OS=Rattus norvegicus GN=Safb PE=1 SV=2
AT2A2_RAT	105		632	114694	0.6686	0.995978	1.462	4	Sarcoplasmic/endoplasmic reticulum calcium ATPase 2 OS=Rattus norvegicus GN=Atp2a2 PE=1 SV=1
FBRL_RAT	541		76	34201	0.8093	1.20557	1.54	2	rRNA 2'-O-methyltransferase fibrillarin OS=Rattus norvegicus GN=Fbl PE=1 SV=2
PRPS1_RAT	196		333	34812	0.4379	0.652316	1.102	2	Ribose-phosphate pyrophosphokinase 1 OS=Rattus norvegicus GN=Prps1 PE=1 SV=2
ARHG2_RAT	38		1319	111840	1.029	1.53285	1.037	24	Rho guanine nucleotide exchange factor 2 OS=Rattus norvegicus GN=Arhgef2 PE=1 SV=1
RTN3_RAT	404	1	130	101454	0.6687	0.996127	1.255	4	Reticulon-3 OS=Rattus norvegicus GN=Rtn3 PE=1 SV=1
RACK1_RAT	44		1223	35055	0.8208	1.2227	1.128	16	Receptor of activated protein C kinase 1 OS=Rattus norvegicus GN=Rack1 PE=1 SV=3
SYGP1_RAT	221	1	302	144631	0.6066	0.90362	1.29	3	Ras/Rap GTPase-activating protein SynGAP OS=Rattus norvegicus GN=Syngap1 PE=1 SV=2
RP3A_RAT	37		1345	75785	0.4812	0.716818	1.074	21	Rabphilin-3A OS=Rattus norvegicus GN=Rph3a PE=1 SV=1
ODPA_RAT	313		203	43199	0.2515	0.374646	1.354	3	Pyruvate dehydrogenase E1 component subunit alpha, somatic form, mitochondrial OS=Rattus norvegicus GN=Pdha1 PE=1 SV=2
PYC_RAT	371		155	129695	0.4645	0.691941	1.409	2	Pyruvate carboxylase, mitochondrial OS=Rattus norvegicus GN=Pc PE=1 SV=2
P33MX_RAT	203		320	32777	0.6341	0.944585	1.026	2	Putative monooxygenase p33MONOX OS=Rattus norvegicus GN=P33monox PE=1 SV=1
DHX30_RAT	48		1115	133913	1.01	1.50454	1.052	28	Putative ATP-dependent RNA helicase DHX30 OS=Rattus norvegicus GN=Dhx30 PE=1 SV=1
PADI2_RAT	440		113	75308	0.9334	1.39044	1.26	2	Protein-arginine deiminase type-2 OS=Rattus norvegicus GN=Padi2 PE=1 SV=1
S61A1_RAT	253		263	52231	0.6092	0.907493	1.362	4	Protein transport protein Sec61 subunit alpha isoform 1 OS=Rattus norvegicus GN=Sec61a1 PE=2 SV=2
ROGDI_RAT	240		280	32185	0.6229	0.927901	1.019	3	Protein rogdi homolog OS=Rattus norvegicus GN=Rogdi PE=2 SV=1
PRC2A_RAT	187		349	228908	0.7632	1.1369	1.162	5	Protein PRRC2A OS=Rattus norvegicus GN=Prrc2a PE=1 SV=1
PPR1B_RAT	575		64	22899	0.5875	0.875168	1.052	2	Protein phosphatase 1 regulatory subunit 1B OS=Rattus norvegicus GN=Ppp1r1b PE=1 SV=1
NDRG2_RAT	311		204	40753	0.3681	0.548339	1.041	2	Protein NDRG2 OS=Rattus norvegicus GN=Ndrg2 PE=1 SV=1
LYRIC_RAT	132		523	63931	0.8728	1.30016	1.028	7	Protein LYRIC OS=Rattus norvegicus GN=Mtdh PE=1 SV=2
KPCG_RAT	126	1	537	78307	0.7427	1.10636	1.051	12	Protein kinase C gamma type OS=Rattus norvegicus GN=Prkcg PE=1 SV=1
KPCD_RAT	463		103	77470	0.5771	0.859675	1.235	2	Protein kinase C delta type OS=Rattus norvegicus GN=Prkcd PE=1 SV=1
IMPCT_RAT	273		239	35972	0.4502	0.670639	1.115	4	Protein IMPACT OS=Rattus norvegicus GN=Impact PE=1 SV=1
BSN_RAT	29	1	1488	418168	1.362	2.0289	1.198	11	Protein bassoon OS=Rattus norvegicus GN=Bsn PE=1 SV=3
AGO2_RAT	91		687	97256	0.9722	1.44823	1.088	8	Protein argonaute-2 OS=Rattus norvegicus GN=Ago2 PE=2 SV=2
PHB2_RAT	292		224	33292	0.5063	0.754208	1.087	4	Prohibitin-2 OS=Rattus norvegicus GN=Phb2 PE=1 SV=1
PBIP1_RAT	519		84	80227	1.255	1.86951	1.488	2	Pre-B-cell leukemia transcription factor-interacting protein 1 OS=Rattus norvegicus GN=Pbxip1 PE=1 SV=1
PABP1_RAT	20		1781	70656	1.042	1.55221	1.09	26	Polyadenylate-binding protein 1 OS=Rattus norvegicus GN=Pabpc1 PE=1 SV=1
PLST_RAT	350		166	70635	704600	1.04961e+06	1748	3	Plastin-3 OS=Rattus norvegicus GN=Pls3 PE=1 SV=2
AT2B4_RAT	53	4	408	133010	0.6627	0.987189	1.101	6	Plasma membrane calcium-transporting ATPase 4 OS=Rattus norvegicus GN=Atp2b4 PE=1 SV=1
AT2B3_RAT	53	3	594	138471	0.9064	1.35022	1.205	8	Plasma membrane calcium-transporting ATPase 3 OS=Rattus norvegicus GN=Atp2b3 PE=1 SV=2
AT2B2_RAT	53	2	973	136724	0.598	0.890809	1.046	12	Plasma membrane calcium-transporting ATPase 2 OS=Rattus norvegicus GN=Atp2b2 PE=1 SV=2
AT2B1_RAT	53	1	1004	138632	0.7189	1.07091	1.08	14	Plasma membrane calcium-transporting ATPase 1 OS=Rattus norvegicus GN=Atp2b1 PE=1 SV=2
PICAL_RAT	176	2	258	69242	0.763	1.1366	1.079	2	Phosphatidylinositol-binding clathrin assembly protein OS=Rattus norvegicus GN=Picalm PE=1 SV=1
PI51C_RAT	235	2	167	75547	0.475	0.707582	1.253	2	Phosphatidylinositol 4-phosphate 5-kinase type-1 gamma OS=Rattus norvegicus GN=Pip5k1c PE=1 SV=1
MPCP_RAT	195		336	39419	0.2608	0.3885	1.253	5	Phosphate carrier protein, mitochondrial OS=Rattus norvegicus GN=Slc25a3 PE=1 SV=1
PHAR1_RAT	124		538	66175	1.046	1.55817	1.092	6	Phosphatase and actin regulator 1 OS=Rattus norvegicus GN=Phactr1 PE=1 SV=1
CSKP_RAT	504		91	103193	0.09712	0.144675	3.158	2	Peripheral plasma membrane protein CASK OS=Rattus norvegicus GN=Cask PE=1 SV=1
NUMBL_RAT	169	1	390	65472	0.5373	0.800387	1.114	3	Numb-like protein OS=Rattus norvegicus GN=Numbl PE=1 SV=1
NPM_RAT	87		715	32540	0.9578	1.42678	1.429	6	Nucleophosmin OS=Rattus norvegicus GN=Npm1 PE=1 SV=1
NUCL_RAT	75		810	77101	0.9985	1.48741	1.129	14	Nucleolin OS=Rattus norvegicus GN=Ncl PE=1 SV=3
DDX21_RAT	287		230	85913	0.7644	1.13869	1.042	2	Nucleolar RNA helicase 2 OS=Rattus norvegicus GN=Ddx21 PE=2 SV=1
NOP16_RAT	252		265	21104	0.956	1.4241	1.047	3	Nucleolar protein 16 OS=Rattus norvegicus GN=Nop16 PE=2 SV=1
NECA1_RAT	239		285	40878	0.5791	0.862655	1.253	3	N-terminal EF-hand calcium-binding protein 1 OS=Rattus norvegicus GN=Necab1 PE=1 SV=1
CALD1_RAT	60		926	60548	0.6496	0.967675	1.042	13	Non-muscle caldesmon OS=Rattus norvegicus GN=Cald1 PE=1 SV=1
SEPT3_RAT	462		103	40572	0.5207	0.775659	1.106	3	Neuronal-specific septin-3 OS=Rattus norvegicus GN=Sept3 PE=1 SV=2
DCX_RAT	16	3	310	40534	0.2141	0.318933	1.347	3	Neuronal migration protein doublecortin OS=Rattus norvegicus GN=Dcx PE=1 SV=2
GPM6A_RAT	338		182	31174	0.5304	0.790109	1.157	2	Neuronal membrane glycoprotein M6-a OS=Rattus norvegicus GN=Gpm6a PE=1 SV=1
NCKP1_RAT	66		876	128781	0.8033	1.19663	1.094	11	Nck-associated protein 1 OS=Rattus norvegicus GN=Nckap1 PE=2 SV=1
NDUF6_RAT	366		158	38491	0.1336	0.199017	1.216	2	NADH dehydrogenase (ubiquinone) complex I, assembly factor 6 OS=Rattus norvegicus GN=Ndufaf6 PE=3 SV=1
MYH9_RAT	49	2	332	226197	0.618	0.920602	1.1	2	Myosin-9 OS=Rattus norvegicus GN=Myh9 PE=1 SV=3
MYH10_RAT	49	1	1029	228824	0.7605	1.13288	1.118	9	Myosin-10 OS=Rattus norvegicus GN=Myh10 PE=1 SV=1
MYPR_RAT	300		219	30057	0.5046	0.751676	1.068	3	Myelin proteolipid protein OS=Rattus norvegicus GN=Plp1 PE=1 SV=2
MBP_RAT	14		2379	21489	0.4471	0.666021	1.329	12	Myelin basic protein OS=Rattus norvegicus GN=Mbp PE=1 SV=3
BIN1_RAT	185		353	64493	0.7206	1.07344	1.076	2	Myc box-dependent-interacting protein 1 OS=Rattus norvegicus GN=Bin1 PE=1 SV=1
MGLL_RAT	241		280	33478	0.4601	0.685387	1.087	2	Monoglyceride lipase OS=Rattus norvegicus GN=Mgll PE=1 SV=1
MOES_RAT	357		164	67697	0.1978	0.294652	1.219	3	Moesin OS=Rattus norvegicus GN=Msn PE=1 SV=3
MK03_RAT	141	2	127	43053	0.3088	0.460003	1.259	2	Mitogen-activated protein kinase 3 OS=Rattus norvegicus GN=Mapk3 PE=1 SV=5
MK01_RAT	141	1	487	41249	0.4109	0.612096	1.047	7	Mitogen-activated protein kinase 1 OS=Rattus norvegicus GN=Mapk1 PE=1 SV=3
GHC2_RAT	209		315	34148	0.226	0.33666	1.175	4	Mitochondrial glutamate carrier 2 OS=Rattus norvegicus GN=Slc25a18 PE=2 SV=2
MFF_RAT	200		328	24955	0.8564	1.27573	1.119	3	Mitochondrial fission factor OS=Rattus norvegicus GN=Mff PE=1 SV=1
M2OM_RAT	61		915	34222	502.3	748.25	11.4	10	Mitochondrial 2-oxoglutarate/malate carrier protein OS=Rattus norvegicus GN=Slc25a11 PE=1 SV=3
MINK1_RAT	78		798	150289	0.4743	0.70654	1.095	16	Misshapen-like kinase 1 OS=Rattus norvegicus GN=Mink1 PE=1 SV=2
MAST1_RAT	110		609	170923	0.3713	0.553106	1.299	5	Microtubule-associated serine/threonine-protein kinase 1 OS=Rattus norvegicus GN=Mast1 PE=1 SV=1
TAU_RAT	301		218	78516	0.4831	0.719648	1.13	4	Microtubule-associated protein tau OS=Rattus norvegicus GN=Mapt PE=1 SV=3
MARE3_RAT	282	1	233	31946	0.5787	0.862059	1.189	4	Microtubule-associated protein RP/EB family member 3 OS=Rattus norvegicus GN=Mapre3 PE=1 SV=1
MARE2_RAT	401		131	36965	0.525	0.782065	1.088	3	Microtubule-associated protein RP/EB family member 2 OS=Rattus norvegicus GN=Mapre2 PE=1 SV=1
MAP6_RAT	8		4252	100423	0.6364	0.948011	1.048	43	Microtubule-associated protein 6 OS=Rattus norvegicus GN=Map6 PE=1 SV=1
MAP4_RAT	42		1235	110233	0.5682	0.846417	1.087	11	Microtubule-associated protein 4 OS=Rattus norvegicus GN=Map4 PE=1 SV=1
MTAP2_RAT	5		5491	202288	0.5774	0.860122	1.044	38	Microtubule-associated protein 2 OS=Rattus norvegicus GN=Map2 PE=1 SV=3
MAP1B_RAT	2	2	3978	269334	0.8415	1.25354	1.038	38	Microtubule-associated protein 1B OS=Rattus norvegicus GN=Map1b PE=1 SV=2
MAP1A_RAT	2	1	15391	299348	0.9706	1.44585	1.05	129	Microtubule-associated protein 1A OS=Rattus norvegicus GN=Map1a PE=1 SV=1
MIC60_RAT	57		982	67135	0.7824	1.1655	1.095	9	MICOS complex subunit Mic60 (Fragment) OS=Rattus norvegicus GN=Immt PE=1 SV=1
MECP2_RAT	174		376	53015	0.9561	1.42425	1.135	4	Methyl-CpG-binding protein 2 OS=Rattus norvegicus GN=Mecp2 PE=1 SV=1
MAGD1_RAT	296		221	85745	1.067	1.58945	1.403	2	Melanoma-associated antigen D1 OS=Rattus norvegicus GN=Maged1 PE=1 SV=3
MARK3_RAT	24	2	870	88696	0.8084	1.20423	1.07	17	MAP/microtubule affinity-regulating kinase 3 OS=Rattus norvegicus GN=Mark3 PE=1 SV=1
LYSM1_RAT	198		330	24863	0.3544	0.527931	1.595	4	LysM and putative peptidoglycan-binding domain-containing protein 1 OS=Rattus norvegicus GN=Lysmd1 PE=1 SV=1
ACSL6_RAT	227		299	78130	0.4243	0.632057	1.149	7	Long-chain-fatty-acid--CoA ligase 6 OS=Rattus norvegicus GN=Acsl6 PE=1 SV=1
ACSL3_RAT	192	1	341	80406	0.1216	0.181141	1.602	3	Long-chain-fatty-acid--CoA ligase 3 OS=Rattus norvegicus GN=Acsl3 PE=1 SV=1
S27A1_RAT	81		783	71238	0.03935	0.0586176	4.422	3	Long-chain fatty acid transport protein 1 OS=Rattus norvegicus GN=Slc27a1 PE=2 SV=1
LONM_RAT	159		433	105726	0.09129	0.13599	3.984	3	Lon protease homolog, mitochondrial OS=Rattus norvegicus GN=Lonp1 PE=2 SV=1
LONP2_RAT	180		360	94334	0.3263	0.486072	1.352	4	Lon protease homolog 2, peroxisomal OS=Rattus norvegicus GN=Lonp2 PE=1 SV=2
LIPA4_RAT	98	2	355	117931	1.094	1.62967	1.114	2	Liprin-alpha-4 (Fragment) OS=Rattus norvegicus GN=Ppfia4 PE=1 SV=1
LIPA3_RAT	98	1	659	133347	1.664	2.47877	1.06	5	Liprin-alpha-3 OS=Rattus norvegicus GN=Ppfia3 PE=1 SV=2
LASP1_RAT	364		160	29951	0.6713	1	1.159	4	LIM and SH3 domain protein 1 OS=Rattus norvegicus GN=Lasp1 PE=1 SV=1
LRRC7_RAT	118		555	166774	0.7356	1.09578	1.104	5	Leucine-rich repeat-containing protein 7 OS=Rattus norvegicus GN=Lrrc7 PE=1 SV=2
LPPRC_RAT	290		225	156554	0.7335	1.09266	1.757	2	Leucine-rich PPR motif-containing protein, mitochondrial OS=Rattus norvegicus GN=Lrpprc PE=1 SV=1
LGI1_RAT	207		317	63687	0.09984	0.148726	1.328	2	Leucine-rich glioma-inactivated protein 1 OS=Rattus norvegicus GN=Lgi1 PE=1 SV=1
LUZP1_RAT	46		1200	117105	4.48	6.67362	1.25	6	Leucine zipper protein 1 OS=Rattus norvegicus GN=Luzp1 PE=1 SV=1
LETM1_RAT	340		180	83008	0.6131	0.913303	1.185	2	LETM1 and EF-hand domain-containing protein 1, mitochondrial OS=Rattus norvegicus GN=Letm1 PE=1 SV=1
LANC1_RAT	19		1926	45210	0.6898	1.02756	1.08	17	LanC-like protein 1 OS=Rattus norvegicus GN=Lancl1 PE=1 SV=2
KIF2A_RAT	154		450	79743	0.9327	1.38939	1.094	11	Kinesin-like protein KIF2A OS=Rattus norvegicus GN=Kif2a PE=1 SV=2
KINH_RAT	403	3	64	109463	0.7816	1.16431	1.009	2	Kinesin-1 heavy chain OS=Rattus norvegicus GN=Kif5b PE=1 SV=1
KIF5A_RAT	403	1	130	116843	0.7399	1.10219	1.059	3	Kinesin heavy chain isoform 5A OS=Rattus norvegicus GN=Kif5a PE=1 SV=1
KHDR1_RAT	537		77	48285	0.05038	0.0750484	1.823	3	KH domain-containing, RNA-binding, signal transduction-associated protein 1 OS=Rattus norvegicus GN=Khdrbs1 PE=1 SV=1
IDH3B_RAT	56		987	42327	0.444	0.661403	1.126	15	Isocitrate dehydrogenase [NAD] subunit beta, mitochondrial OS=Rattus norvegicus GN=Idh3B PE=2 SV=1
PRKRA_RAT	237		288	34334	0.8346	1.24326	1.203	9	Interferon-inducible double-stranded RNA-dependent protein kinase activator A OS=Rattus norvegicus GN=Prkra PE=1 SV=1
IRS1_RAT	259		258	131096	0.3643	0.542678	1.216	3	Insulin receptor substrate 1 OS=Rattus norvegicus GN=Irs1 PE=1 SV=1
ITPR1_RAT	94	1	679	313065	0.967	1.44049	1.03	5	Inositol 1,4,5-trisphosphate receptor type 1 OS=Rattus norvegicus GN=Itpr1 PE=1 SV=2
HMGCL_RAT	210		315	34170	0.8534	1.27126	1.073	8	Hydroxymethylglutaryl-CoA lyase, mitochondrial OS=Rattus norvegicus GN=Hmgcl PE=2 SV=1
GLO2_RAT	255		262	34088	3.119	4.64621	1.621	6	Hydroxyacylglutathione hydrolase, mitochondrial OS=Rattus norvegicus GN=Hagh PE=1 SV=2
H14_RAT	150	1	457	21974	0.7914	1.17891	1.102	4	Histone H1.4 OS=Rattus norvegicus GN=Hist1h1e PE=1 SV=3
H10_RAT	489		94	20872	0.8956	1.33413	1.061	2	Histone H1.0 OS=Rattus norvegicus GN=H1f0 PE=2 SV=2
HXK1_RAT	228		297	102342	0.8036	1.19708	1.325	3	Hexokinase-1 OS=Rattus norvegicus GN=Hk1 PE=1 SV=4
HNRPQ_RAT	193		340	59674	0.6239	0.929391	1.15	5	Heterogeneous nuclear ribonucleoprotein Q OS=Rattus norvegicus GN=Syncrip PE=2 SV=1
HNRPM_RAT	45		1209	73733	0.5671	0.844779	1.069	8	Heterogeneous nuclear ribonucleoprotein M OS=Rattus norvegicus GN=Hnrnpm PE=1 SV=4
ROA3_RAT	226		301	39628	0.7428	1.10651	1.067	6	Heterogeneous nuclear ribonucleoprotein A3 OS=Rattus norvegicus GN=Hnrnpa3 PE=1 SV=1
HP1B3_RAT	100		657	60769	0.9178	1.3672	1.034	9	Heterochromatin protein 1-binding protein 3 OS=Rattus norvegicus GN=Hp1bp3 PE=1 SV=1
HSP72_RAT	23	3	658	69599	0.7952	1.18457	1.193	7	Heat shock-related 70 kDa protein 2 OS=Rattus norvegicus GN=Hspa2 PE=1 SV=2
HS90B_RAT	190	1	347	83229	0.8932	1.33055	1.151	3	Heat shock protein HSP 90-beta OS=Rattus norvegicus GN=Hsp90ab1 PE=1 SV=4
HS105_RAT	74	1	812	96357	0.6427	0.957396	1.268	9	Heat shock protein 105 kDa OS=Rattus norvegicus GN=Hsph1 PE=1 SV=1
HSP7C_RAT	23	1	1684	70827	0.8852	1.31864	1.53	24	Heat shock cognate 71 kDa protein OS=Rattus norvegicus GN=Hspa8 PE=1 SV=1
HS71A_RAT	23	4	359	70142	0.9122	1.35886	1.283	3	Heat shock 70 kDa protein 1A OS=Rattus norvegicus GN=Hspa1a PE=2 SV=1
HBS1L_RAT	178		363	74727	0.8908	1.32698	1.199	6	HBS1-like protein OS=Rattus norvegicus GN=Hbs1l PE=1 SV=1
GBB5_RAT	217		309	38707	0.4256	0.633994	1.1983	4	Guanine nucleotide-binding protein subunit beta-5 OS=Rattus norvegicus GN=Gnb5 PE=2 SV=1
GNA13_RAT	64	4	248	43984	0.3865	0.575749	1.243	2	Guanine nucleotide-binding protein subunit alpha-13 OS=Rattus norvegicus GN=Gna13 PE=1 SV=1
GNAO_RAT	64	1	896	40043	0.4378	0.652167	1.041	9	Guanine nucleotide-binding protein G(o) subunit alpha OS=Rattus norvegicus GN=Gnao1 PE=1 SV=2
GBB2_RAT	163	2	315	37307	0.2533	0.377328	1.26	4	Guanine nucleotide-binding protein G(I)/G(S)/G(T) subunit beta-2 OS=Rattus norvegicus GN=Gnb2 PE=1 SV=4
GBB1_RAT	163	1	423	37353	0.2129	0.317146	1.225	5	Guanine nucleotide-binding protein G(I)/G(S)/G(T) subunit beta-1 OS=Rattus norvegicus GN=Gnb1 PE=1 SV=4
GNAI2_RAT	64	2	356	40473	0.3962	0.590198	1.113	2	Guanine nucleotide-binding protein G(i) subunit alpha-2 OS=Rattus norvegicus GN=Gnai2 PE=1 SV=3
GNAI1_RAT	64	3	324	40319	0.3668	0.546403	1.025	2	Guanine nucleotide-binding protein G(i) subunit alpha-1 OS=Rattus norvegicus GN=Gnai1 PE=1 SV=3
GTPB1_RAT	212		312	72443	0.4888	0.728139	1.168	2	GTP-binding protein 1 OS=Rattus norvegicus GN=Gtpbp1 PE=1 SV=1
GRPE1_RAT	120		551	24282	0.4707	0.701177	1.101	11	GrpE protein homolog 1, mitochondrial OS=Rattus norvegicus GN=Grpel1 PE=1 SV=2
GRB2_RAT	244		272	25190	0.9123	1.359	1.05	5	Growth factor receptor-bound protein 2 OS=Rattus norvegicus GN=Grb2 PE=1 SV=1
PYGM_RAT	119	1	552	97212	0.6979	1.03962	1.084	6	Glycogen phosphorylase, muscle form OS=Rattus norvegicus GN=Pygm PE=1 SV=5
PYGB_RAT	119	2	375	96113	0.6901	1.02801	1.075	8	Glycogen phosphorylase, brain form (Fragment) OS=Rattus norvegicus GN=Pygb PE=1 SV=3
GPDM_RAT	395		136	80921	0.7436	1.1077	1.094	3	Glycerol-3-phosphate dehydrogenase, mitochondrial OS=Rattus norvegicus GN=Gpd2 PE=1 SV=1
G3P_RAT	17		1956	35805	0.2058	0.306569	2.162	12	Glyceraldehyde-3-phosphate dehydrogenase OS=Rattus norvegicus GN=Gapdh PE=1 SV=3
GSTM4_RAT	3	3	5876	25664	0.8508	1.26739	1.077	29	Glutathione S-transferase Yb-3 OS=Rattus norvegicus GN=Gstm3 PE=1 SV=2
GSTP1_RAT	6		5001	23424	0.6193	0.922538	1.109	13	Glutathione S-transferase P OS=Rattus norvegicus GN=Gstp1 PE=1 SV=2
GSTM5_RAT	3	1	6309	26611	0.774	1.15299	1.215	19	Glutathione S-transferase Mu 5 OS=Rattus norvegicus GN=Gstm5 PE=1 SV=3
GSTM2_RAT	3	4	2902	25686	0.8534	1.27126	1.134	25	Glutathione S-transferase Mu 2 OS=Rattus norvegicus GN=Gstm2 PE=1 SV=2
GSTM1_RAT	3	2	6155	25897	0.8814	1.31297	1.084	23	Glutathione S-transferase Mu 1 OS=Rattus norvegicus GN=Gstm1 PE=1 SV=2
GSTA4_RAT	25	4	502	25493	0.8808	1.31208	1.045	10	Glutathione S-transferase alpha-4 OS=Rattus norvegicus GN=Gsta4 PE=1 SV=2
GSTA3_RAT	25	1	1612	25303	0.9422	1.40355	1.165	17	Glutathione S-transferase alpha-3 OS=Rattus norvegicus GN=Gsta3 PE=1 SV=3
GSTA1_RAT	25	3	520	25591	0.9754	1.453	1.336	4	Glutathione S-transferase alpha-1 OS=Rattus norvegicus GN=Gsta1 PE=1 SV=3
GSTA6_RAT	25	2	578	25791	0.8994	1.33979	1.043	8	Glutathione S-transferase A6 OS=Rattus norvegicus GN=Gsta6 PE=1 SV=1
GPX1_RAT	219		308	22292	1.075	1.60137	1.028	6	Glutathione peroxidase 1 OS=Rattus norvegicus GN=Gpx1 PE=1 SV=4
GLRX3_RAT	125		537	37825	0.749	1.11575	1.074	10	Glutaredoxin-3 OS=Rattus norvegicus GN=Glrx3 PE=1 SV=2
GLNA_RAT	71		829	42240	0.3694	0.550276	1.073	9	Glutamine synthetase OS=Rattus norvegicus GN=Glul PE=1 SV=3
NMDE4_RAT	771		33	143011	0.5028	0.748994	1.488	2	Glutamate receptor ionotropic, NMDA 2D OS=Rattus norvegicus GN=Grin2d PE=1 SV=2
NMDE2_RAT	360		162	165965	1.042	1.55221	1.192	3	Glutamate receptor ionotropic, NMDA 2B OS=Rattus norvegicus GN=Grin2b PE=1 SV=1
NMDZ1_RAT	283		232	105442	0.7065	1.05244	1.183	3	Glutamate receptor ionotropic, NMDA 1 OS=Rattus norvegicus GN=Grin1 PE=1 SV=1
GEPH_RAT	234		290	83213	0.7518	1.11992	1.284	2	Gephyrin OS=Rattus norvegicus GN=Gphn PE=1 SV=3
CXA1_RAT	619		57	43004	1.38	2.05571	1.413	3	Gap junction alpha-1 protein OS=Rattus norvegicus GN=Gja1 PE=1 SV=2
ALDOA_RAT	166	1	405	39327	0.8557	1.27469	1.196	3	Fructose-bisphosphate aldolase A OS=Rattus norvegicus GN=Aldoa PE=1 SV=2
FXR1_RAT	70	2	710	63908	0.8872	1.32161	1.083	8	Fragile X mental retardation syndrome-related protein 1 OS=Rattus norvegicus GN=Fxr1 PE=1 SV=1
FARP1_RAT	106		630	118768	0.9497	1.41472	1.099	7	FERM, RhoGEF and pleckstrin domain-containing protein 1 OS=Rattus norvegicus GN=Farp1 PE=1 SV=2
CAPZB_RAT	277		235	30609	0.6191	0.92224	1.107	4	F-actin-capping protein subunit beta OS=Rattus norvegicus GN=Capzb PE=1 SV=1
CAZA2_RAT	280	1	233	32947	0.652	0.97125	1.13	6	F-actin-capping protein subunit alpha-2 OS=Rattus norvegicus GN=Capza2 PE=1 SV=1
CAZA1_RAT	280	2	224	32889	0.6933	1.03277	1.055	4	F-actin-capping protein subunit alpha-1 OS=Rattus norvegicus GN=Capza1 PE=1 SV=1
XPO1_RAT	670		48	122959	0.4168	0.620885	3.619	2	Exportin-1 OS=Rattus norvegicus GN=Xpo1 PE=1 SV=1
EAA2_RAT	73		816	62066	0.363	0.540742	1.194	6	Excitatory amino acid transporter 2 OS=Rattus norvegicus GN=Slc1a2 PE=1 SV=2
IF4E_RAT	491		94	25037	0.4605	0.685982	1.044	2	Eukaryotic translation initiation factor 4E OS=Rattus norvegicus GN=Eif4e PE=1 SV=1
EIF3I_RAT	308		211	36438	0.7362	1.09668	1.027	3	Eukaryotic translation initiation factor 3 subunit I OS=Rattus norvegicus GN=Eif3i PE=2 SV=1
EIF3H_RAT	522		84	39880	0.9166	1.36541	1.072	4	Eukaryotic translation initiation factor 3 subunit H OS=Rattus norvegicus GN=Eif3h PE=1 SV=1
EIF3G_RAT	361		162	35629	0.6201	0.92373	1.095	3	Eukaryotic translation initiation factor 3 subunit G OS=Rattus norvegicus GN=Eif3g PE=1 SV=1
EIF3D_RAT	223		301	63948	0.9494	1.41427	1.301	3	Eukaryotic translation initiation factor 3 subunit D OS=Rattus norvegicus GN=Eif3d PE=1 SV=1
EIF3C_RAT	137		498	105369	1.442	2.14807	1.134	6	Eukaryotic translation initiation factor 3 subunit C OS=Rattus norvegicus GN=Eif3c PE=1 SV=1
EIF3B_RAT	349		167	90854	1.709	2.54581	1.297	4	Eukaryotic translation initiation factor 3 subunit B OS=Rattus norvegicus GN=Eif3b PE=1 SV=1
EIF3A_RAT	115		576	163097	1.602	2.38641	1.036	14	Eukaryotic translation initiation factor 3 subunit A OS=Rattus norvegicus GN=Eif3a PE=2 SV=2
ERMIN_RAT	394		136	32208	0.5092	0.758528	1.204	3	Ermin OS=Rattus norvegicus GN=Ermn PE=1 SV=1
EPS8_RAT	113		579	91871	0.7066	1.05258	1.188	4	Epidermal growth factor receptor kinase substrate 8 OS=Rattus norvegicus GN=Eps8 PE=1 SV=2
EF2_RAT	136		499	95223	0.2171	0.323402	1.936	3	Elongation factor 2 OS=Rattus norvegicus GN=Eef2 PE=1 SV=4
EF1D_RAT	208		316	31311	0.888	1.32281	1.036	2	Elongation factor 1-delta OS=Rattus norvegicus GN=Eef1d PE=1 SV=2
EF1A2_RAT	122	1	550	50422	0.4232	0.630419	1.099	3	Elongation factor 1-alpha 2 OS=Rattus norvegicus GN=Eef1a2 PE=1 SV=1
EF1A1_RAT	122	2	480	50082	0.3911	0.582601	1.198	3	Elongation factor 1-alpha 1 OS=Rattus norvegicus GN=Eef1a1 PE=2 SV=1
ELAV4_RAT	88	2	704	40938	0.7634	1.1372	1.066	12	ELAV-like protein 4 OS=Rattus norvegicus GN=Elavl4 PE=1 SV=1
ELAV2_RAT	88	1	715	39481	0.785	1.16937	1.055	12	ELAV-like protein 2 OS=Rattus norvegicus GN=Elavl2 PE=1 SV=1
ELAV1_RAT	309		210	36146	0.7817	1.16446	1.13	4	ELAV-like protein 1 OS=Rattus norvegicus GN=Elavl1 PE=1 SV=1
TRIM9_RAT	129		525	79155	0.4508	0.671533	1.312	4	E3 ubiquitin-protein ligase TRIM9 OS=Rattus norvegicus GN=Trim9 PE=1 SV=1
OPA1_RAT	65		888	111238	0.6426	0.957247	1.056	17	Dynamin-like 120 kDa protein, mitochondrial OS=Rattus norvegicus GN=Opa1 PE=1 SV=1
DYN2_RAT	116	2	278	98169	0.7047	1.04975	1.075	5	Dynamin-2 OS=Rattus norvegicus GN=Dnm2 PE=1 SV=1
DNM1L_RAT	145		473	83856	0.7705	1.14777	1.337	3	Dynamin-1-like protein OS=Rattus norvegicus GN=Dnm1l PE=1 SV=1
DYN1_RAT	116	1	571	97234	0.7839	1.16773	1.077	9	Dynamin-1 OS=Rattus norvegicus GN=Dnm1 PE=1 SV=2
DREB_RAT	225		301	77424	0.9295	1.38463	1.046	4	Drebrin OS=Rattus norvegicus GN=Dbn1 PE=1 SV=3
STAU2_RAT	179		362	62642	0.3656	0.544615	1.282	3	Double-stranded RNA-binding protein Staufen homolog 2 OS=Rattus norvegicus GN=Stau2 PE=1 SV=1
RPN1_RAT	214		311	68262	0.939	1.39878	1.575	2	Dolichyl-diphosphooligosaccharide--protein glycosyltransferase subunit 1 OS=Rattus norvegicus GN=Rpn1 PE=2 SV=1
DJC16_RAT	276		235	88814	0.4525	0.674065	2.44	3	DnaJ homolog subfamily C member 16 OS=Rattus norvegicus GN=Dnajc16 PE=2 SV=1
SMBP2_RAT	263		255	108373	0.864	1.28705	1.03	4	DNA-binding protein SMUBP-2 OS=Rattus norvegicus GN=Ighmbp2 PE=1 SV=1
DNA2_RAT	702		43	119512	0.9924	1.47833	1.028	2	DNA replication ATP-dependent helicase/nuclease DNA2 OS=Rattus norvegicus GN=Dna2 PE=3 SV=1
DDB1_RAT	348		167	126781	0.8852	1.31864	1.123	5	DNA damage-binding protein 1 OS=Rattus norvegicus GN=Ddb1 PE=1 SV=1
DLGP4_RAT	168	1	400	107968	0.5217	0.777149	1.301	3	Disks large-associated protein 4 OS=Rattus norvegicus GN=Dlgap4 PE=1 SV=1
DLGP2_RAT	168	2	355	118903	0.4164	0.620289	1.405	3	Disks large-associated protein 2 OS=Rattus norvegicus GN=Dlgap2 PE=1 SV=3
DLG4_RAT	1	1	25449	80416	0.7484	1.11485	1.338	43	Disks large homolog 4 OS=Rattus norvegicus GN=Dlg4 PE=1 SV=1
DLG3_RAT	1	3	534	93481	0.05758	0.0857739	4.278	3	Disks large homolog 3 OS=Rattus norvegicus GN=Dlg3 PE=1 SV=1
DLG2_RAT	1	4	381	94875	0.06228	0.0927752	1.877	2	Disks large homolog 2 OS=Rattus norvegicus GN=Dlg2 PE=1 SV=1
DLG1_RAT	1	2	641	100509	1.133	1.68777	2.518	7	Disks large homolog 1 OS=Rattus norvegicus GN=Dlg1 PE=1 SV=1
DPYL5_RAT	436		115	61501	0.03704	0.0551765	1.317	2	Dihydropyrimidinase-related protein 5 OS=Rattus norvegicus GN=Dpysl5 PE=1 SV=1
DPYL2_RAT	22	1	1740	62239	0.322	0.479666	1.17	12	Dihydropyrimidinase-related protein 2 OS=Rattus norvegicus GN=Dpysl2 PE=1 SV=1
DPYL1_RAT	22	2	957	62157	0.4684	0.697751	1.27	8	Dihydropyrimidinase-related protein 1 OS=Rattus norvegicus GN=Crmp1 PE=1 SV=1
ODP2_RAT	274		237	67123	0.5509	0.820647	1.183	2	Dihydrolipoyllysine-residue acetyltransferase component of pyruvate dehydrogenase complex, mitochondrial OS=Rattus norvegicus GN=Dlat PE=1 SV=3
DGKZ_RAT	321		193	103943	0.7855	1.17012	1.045	3	Diacylglycerol kinase zeta OS=Rattus norvegicus GN=Dgkz PE=1 SV=1
DGKB_RAT	194		338	90229	0.7072	1.05348	1.173	3	Diacylglycerol kinase beta OS=Rattus norvegicus GN=Dgkb PE=1 SV=1
BDH_RAT	175		368	38177	0.2933	0.436913	1.238	4	D-beta-hydroxybutyrate dehydrogenase, mitochondrial OS=Rattus norvegicus GN=Bdh1 PE=1 SV=2
BACH_RAT	353		165	42708	0.233	0.347088	1.603	2	Cytosolic acyl coenzyme A thioester hydrolase OS=Rattus norvegicus GN=Acot7 PE=1 SV=4
UCRI_RAT	337		183	29427	0.2963	0.441382	1.747	2	Cytochrome b-c1 complex subunit Rieske, mitochondrial OS=Rattus norvegicus GN=Uqcrfs1 PE=1 SV=2
CDK5_RAT	242		279	33233	0.3523	0.524803	1.141	7	Cyclin-dependent-like kinase 5 OS=Rattus norvegicus GN=Cdk5 PE=1 SV=1
CNKR2_RAT	148		458	117317	0.8672	1.29182	1.212	6	Connector enhancer of kinase suppressor of ras 2 OS=Rattus norvegicus GN=Cnksr2 PE=1 SV=1
CSDE1_RAT	269		246	88839	0.8524	1.26978	1.189	3	Cold shock domain-containing protein E1 OS=Rattus norvegicus GN=Csde1 PE=2 SV=1
C2D1A_RAT	97		662	103523	0.3088	0.460003	1.167	11	Coiled-coil and C2 domain-containing protein 1A OS=Rattus norvegicus GN=Cc2d1a PE=1 SV=2
CLAP2_RAT	21		1771	140551	0.7378	1.09906	1.148	25	CLIP-associating protein 2 OS=Rattus norvegicus GN=Clasp2 PE=1 SV=1
CLH1_RAT	27		1513	191477	1.121	1.66989	1.044	34	Clathrin heavy chain 1 OS=Rattus norvegicus GN=Cltc PE=1 SV=3
AP180_RAT	176	1	365	93460	0.9292	1.38418	1.101	4	Clathrin coat assembly protein AP180 OS=Rattus norvegicus GN=Snap91 PE=1 SV=1
CEND_RAT	498		92	15034	0.4836	0.720393	1.069	2	Cell cycle exit and neuronal differentiation protein 1 OS=Rattus norvegicus GN=Cend1 PE=1 SV=1
CNO10_RAT	573		65	81767	0.7359	1.09623	1.221	2	CCR4-NOT transcription complex subunit 10 OS=Rattus norvegicus GN=Cnot10 PE=2 SV=1
CTND2_RAT	411		126	28910	0.7108	1.05884	1.307	2	Catenin delta-2 (Fragment) OS=Rattus norvegicus GN=Ctnnd2 PE=1 SV=1
CTNB1_RAT	331		186	85400	0.6353	0.946373	1.122	2	Catenin beta-1 OS=Rattus norvegicus GN=Ctnnb1 PE=1 SV=1
CSKI1_RAT	144		473	150255	0.7066	1.05258	1.126	6	Caskin-1 OS=Rattus norvegicus GN=Caskin1 PE=1 SV=1
CPT1A_RAT	143	1	473	88069	0.4296	0.639952	1.282	6	Carnitine O-palmitoyltransferase 1, liver isoform OS=Rattus norvegicus GN=Cpt1a PE=1 SV=2
CBR1_RAT	104		635	30559	0.7905	1.17757	1.051	8	Carbonyl reductase [NADPH] 1 OS=Rattus norvegicus GN=Cbr1 PE=1 SV=2
CAH2_RAT	528		82	29096	0.9558	1.4238	1.175	3	Carbonic anhydrase 2 OS=Rattus norvegicus GN=Ca2 PE=1 SV=2
CAPR1_RAT	36		1355	78073	0.9352	1.39312	1.164	12	Caprin-1 OS=Rattus norvegicus GN=Caprin1 PE=1 SV=2
CLIP2_RAT	336		183	115410	1.233	1.83673	2.211	2	CAP-Gly domain-containing linker protein 2 OS=Rattus norvegicus GN=Clip2 PE=1 SV=1
KAPCB_RAT	421	1	121	40682	0.5069	0.755102	1.103	2	cAMP-dependent protein kinase catalytic subunit beta OS=Rattus norvegicus GN=Prkacb PE=1 SV=2
KAPCA_RAT	421	2	105	40594	0.4804	0.715626	1.069	2	cAMP-dependent protein kinase catalytic subunit alpha OS=Rattus norvegicus GN=Prkaca PE=1 SV=2
CAMKV_RAT	285		231	54072	1.245	1.85461	1.102	4	CaM kinase-like vesicle-associated protein OS=Rattus norvegicus GN=Camkv PE=1 SV=1
BCAS1_RAT	182		357	58588	0.5139	0.76553	1.122	4	Breast carcinoma-amplified sequence 1 homolog (Fragment) OS=Rattus norvegicus GN=Bcas1 PE=1 SV=2
E41L1_RAT	51		1005	98182	0.9053	1.34858	1.049	10	Band 4.1-like protein 1 OS=Rattus norvegicus GN=Epb41l1 PE=1 SV=1
YMEL1_RAT	133	1	520	79817	0.08021	0.119485	1.22	2	ATP-dependent zinc metalloprotease YME1L1 OS=Rattus norvegicus GN=Yme1l1 PE=2 SV=1
DDX1_RAT	43		1228	82445	0.532	0.792492	1.059	20	ATP-dependent RNA helicase DDX1 OS=Rattus norvegicus GN=Ddx1 PE=1 SV=1
PFKAP_RAT	26	1	1562	85665	0.3886	0.578877	1.058	24	ATP-dependent 6-phosphofructokinase, platelet type OS=Rattus norvegicus GN=Pfkp PE=1 SV=2
PFKAM_RAT	26	2	1245	85506	0.29	0.431998	1.052	19	ATP-dependent 6-phosphofructokinase, muscle type OS=Rattus norvegicus GN=Pfkm PE=1 SV=3
PFKAL_RAT	26	3	868	85284	0.3225	0.480411	1.169	9	ATP-dependent 6-phosphofructokinase, liver type OS=Rattus norvegicus GN=Pfkl PE=1 SV=3
ACLY_RAT	251		265	120559	0.7939	1.18263	1.126	4	ATP-citrate synthase OS=Rattus norvegicus GN=Acly PE=1 SV=1
ABCF1_RAT	312		203	95193	0.8877	1.32236	1.096	4	ATP-binding cassette sub-family F member 1 OS=Rattus norvegicus GN=Abcf1 PE=1 SV=1
ATAD3_RAT	291		225	66718	0.2295	0.341874	1.116	3	ATPase family AAA domain-containing protein 3 OS=Rattus norvegicus GN=Atad3 PE=1 SV=1
ATPG_RAT	157		437	30172	0.301	0.448384	1.103	4	ATP synthase subunit gamma, mitochondrial OS=Rattus norvegicus GN=Atp5c1 PE=1 SV=2
AT5F1_RAT	327		188	28850	0.2143	0.319231	1.07	2	ATP synthase F(0) complex subunit B1, mitochondrial OS=Rattus norvegicus GN=Atp5f1 PE=1 SV=1
ARM10_RAT	206		319	33401	0.09221	0.13736	1.793	2	Armadillo repeat-containing protein 10 OS=Rattus norvegicus GN=Armc10 PE=1 SV=1
SYRC_RAT	201		326	75762	0.859	1.27961	1.072	4	Arginine--tRNA ligase, cytoplasmic OS=Rattus norvegicus GN=Rars PE=1 SV=2
AGAP2_RAT	93		685	124361	1.134	1.68926	1.457	6	Arf-GAP with GTPase, ANK repeat and PH domain-containing protein 2 OS=Rattus norvegicus GN=Agap2 PE=1 SV=1
GIT1_RAT	216		310	85178	0.6341	0.944585	1.069	6	ARF GTPase-activating protein GIT1 OS=Rattus norvegicus GN=Git1 PE=1 SV=1
AMZ2_RAT	289		226	41353	0.2719	0.405035	1.048	2	Archaemetzincin-2 OS=Rattus norvegicus GN=Amz2 PE=2 SV=2
AP2B1_RAT	152	1	454	104486	1.085	1.61627	1.178	4	AP-2 complex subunit beta OS=Rattus norvegicus GN=Ap2b1 PE=1 SV=1
AP2A2_RAT	99		657	103979	0.7201	1.07269	1.124	9	AP-2 complex subunit alpha-2 OS=Rattus norvegicus GN=Ap2a2 PE=1 SV=3
ANK3_RAT	39		1291	284266	0.9202	1.37077	1.326	5	Ankyrin-3 OS=Rattus norvegicus GN=Ank3 PE=1 SV=3
TRY1_RAT	30		1477	25943	0.9496	1.41457	1.054	2	Anionic trypsin-1 OS=Rattus norvegicus GN=Prss1 PE=1 SV=1
AMPH_RAT	284		232	74832	0.6921	1.03098	1.047	7	Amphiphysin OS=Rattus norvegicus GN=Amph PE=1 SV=1
ATAT_RAT	112		594	47298	0.5683	0.846566	1.065	12	Alpha-tubulin N-acetyltransferase 1 OS=Rattus norvegicus GN=Atat1 PE=1 SV=1
AKAP5_RAT	319		194	75916	562400	837777	2064	3	A-kinase anchor protein 5 OS=Rattus norvegicus GN=Akap5 PE=1 SV=2
ARFG3_RAT	293		224	57635	0.3338	0.497244	1.055	2	ADP-ribosylation factor GTPase-activating protein 3 OS=Rattus norvegicus GN=Arfgap3 PE=1 SV=1
ADT2_RAT	9	1	3926	32880	0.1897	0.282586	1.122	20	ADP/ATP translocase 2 OS=Rattus norvegicus GN=Slc25a5 PE=1 SV=3
ADT1_RAT	9	2	3431	32968	0.1971	0.293609	1.123	18	ADP/ATP translocase 1 OS=Rattus norvegicus GN=Slc25a4 PE=1 SV=3
SAHH2_RAT	444		112	53719	0.2924	0.435573	1.057	3	Adenosylhomocysteinase 2 OS=Rattus norvegicus GN=Ahcyl1 PE=1 SV=2
APC_RAT	62		898	310342	0.5673	0.845077	1.089	9	Adenomatous polyposis coli protein OS=Rattus norvegicus GN=Apc PE=1 SV=1
TCP4_RAT	108		621	14432	0.7522	1.12051	1.072	2	Activated RNA polymerase II transcriptional coactivator p15 OS=Rattus norvegicus GN=Sub1 PE=1 SV=3
ARPC2_RAT	320		194	34370	0.678	1.00998	1.199	3	Actin-related protein 2/3 complex subunit 2 OS=Rattus norvegicus GN=Arpc2 PE=1 SV=1
ACTG_RAT	32	1	1451	41766	0.3114	0.463876	1.081	18	Actin, cytoplasmic 2 OS=Rattus norvegicus GN=Actg1 PE=1 SV=1
ACTB_RAT	32	2	1351	41710	0.3109	0.463131	1.066	17	Actin, cytoplasmic 1 OS=Rattus norvegicus GN=Actb PE=1 SV=1
ACTC_RAT	32	3	841	41992	0.3059	0.455683	1.071	11	Actin, alpha cardiac muscle 1 OS=Rattus norvegicus GN=Actc1 PE=2 SV=1
ACON_RAT	55		990	85380	0.5247	0.781618	1.241	18	Aconitate hydratase, mitochondrial OS=Rattus norvegicus GN=Aco2 PE=1 SV=2
THIL_RAT	333		183	44666	0.05725	0.0852823	1.047	2	Acetyl-CoA acetyltransferase, mitochondrial OS=Rattus norvegicus GN=Acat1 PE=1 SV=1
GRP78_RAT	23	2	1316	72302	0.7183	1.07001	1.094	19	78 kDa glucose-regulated protein OS=Rattus norvegicus GN=Hspa5 PE=1 SV=1
INP5E_RAT	183		356	72193	0.4519	0.673171	1.248	3	72 kDa inositol polyphosphate 5-phosphatase OS=Rattus norvegicus GN=Inpp5e PE=1 SV=2
RL9_RAT	167		402	21880	0.9162	1.36481	1.043	5	60S ribosomal protein L9 OS=Rattus norvegicus GN=Rpl9 PE=1 SV=1
RL8_RAT	153		454	28007	0.8123	1.21004	1.171	7	60S ribosomal protein L8 OS=Rattus norvegicus GN=Rpl8 PE=2 SV=2
RL7A_RAT	82		755	29977	0.853	1.27067	1.073	14	60S ribosomal protein L7a OS=Rattus norvegicus GN=Rpl7a PE=1 SV=2
RL7_RAT	69		852	30310	0.8647	1.2881	1.107	16	60S ribosomal protein L7 OS=Rattus norvegicus GN=Rpl7 PE=1 SV=2
RL6_RAT	47		1159	33541	0.8467	1.26128	1.057	14	60S ribosomal protein L6 OS=Rattus norvegicus GN=Rpl6 PE=1 SV=5
RL5_RAT	33		1429	34437	0.8309	1.23775	1.133	13	60S ribosomal protein L5 OS=Rattus norvegicus GN=Rpl5 PE=1 SV=3
RL4_RAT	123		546	47227	0.6642	0.989424	1.098	4	60S ribosomal protein L4 OS=Rattus norvegicus GN=Rpl4 PE=1 SV=3
RL28_RAT	485		95	15839	0.6904	1.02845	1.155	2	60S ribosomal protein L28 OS=Rattus norvegicus GN=Rpl28 PE=1 SV=4
RL26_RAT	454		106	17267	0.6222	0.926858	1.053	2	60S ribosomal protein L26 OS=Rattus norvegicus GN=Rpl26 PE=1 SV=1
RL24_RAT	130		525	17768	0.6663	0.992552	1.112	4	60S ribosomal protein L24 OS=Rattus norvegicus GN=Rpl24 PE=2 SV=1
RL23A_RAT	270		245	17684	0.8222	1.22479	1.127	2	60S ribosomal protein L23a OS=Rattus norvegicus GN=Rpl23a PE=2 SV=1
RL21_RAT	258		259	18454	0.6701	0.998212	1.031	3	60S ribosomal protein L21 OS=Rattus norvegicus GN=Rpl21 PE=1 SV=3
RL19_RAT	128		528	23451	0.8687	1.29406	1.068	4	60S ribosomal protein L19 OS=Rattus norvegicus GN=Rpl19 PE=1 SV=1
RL18A_RAT	330		187	20719	0.478	0.712051	1.081	5	60S ribosomal protein L18a OS=Rattus norvegicus GN=Rpl18a PE=2 SV=1
RL18_RAT	40		1244	21645	0.9292	1.38418	1.069	8	60S ribosomal protein L18 OS=Rattus norvegicus GN=Rpl18 PE=1 SV=2
RL17_RAT	248		270	21383	0.9773	1.45583	1.051	6	60S ribosomal protein L17 OS=Rattus norvegicus GN=Rpl17 PE=2 SV=3
RL15_RAT	142		477	24131	1.016	1.51348	1.197	11	60S ribosomal protein L15 OS=Rattus norvegicus GN=Rpl15 PE=1 SV=2
RL14_RAT	134		517	23324	0.5839	0.869805	1.14	5	60S ribosomal protein L14 OS=Rattus norvegicus GN=Rpl14 PE=1 SV=3
RL13A_RAT	107		626	23461	0.9429	1.40459	1.292	7	60S ribosomal protein L13a OS=Rattus norvegicus GN=Rpl13a PE=1 SV=2
RL13_RAT	84		746	24294	0.8551	1.2738	1.38	6	60S ribosomal protein L13 OS=Rattus norvegicus GN=Rpl13 PE=1 SV=2
RL11_RAT	12	2	277	20240	0.557	0.829733	1.108	4	60S ribosomal protein L11 OS=Rattus norvegicus GN=Rpl11 PE=1 SV=2
RL10A_RAT	50		1008	24816	0.8069	1.202	1.17	10	60S ribosomal protein L10a OS=Rattus norvegicus GN=Rpl10a PE=1 SV=2
RL10_RAT	121		551	24588	0.9936	1.48011	1.065	6	60S ribosomal protein L10 OS=Rattus norvegicus GN=Rpl10 PE=1 SV=3
RLA0_RAT	35		1381	34194	0.8276	1.23283	1.227	11	60S acidic ribosomal protein P0 OS=Rattus norvegicus GN=Rplp0 PE=1 SV=2
AAKG1_RAT	613		58	37363	0.2629	0.391628	1.071	3	5'-AMP-activated protein kinase subunit gamma-1 OS=Rattus norvegicus GN=Prkag1 PE=1 SV=3
AAKB2_RAT	181	1	359	30208	0.03088	0.0460003	5.212	4	5'-AMP-activated protein kinase subunit beta-2 OS=Rattus norvegicus GN=Prkab2 PE=1 SV=1
AAPK1_RAT	127	1	533	63933	0.1472	0.219276	1.111	5	5'-AMP-activated protein kinase catalytic subunit alpha-1 OS=Rattus norvegicus GN=Prkaa1 PE=1 SV=2
RSSA_RAT	18		1945	32803	0.8417	1.25384	1.13	15	40S ribosomal protein SA OS=Rattus norvegicus GN=Rpsa PE=1 SV=3
RS9_RAT	96		663	22578	0.9313	1.38731	1.072	14	40S ribosomal protein S9 OS=Rattus norvegicus GN=Rps9 PE=1 SV=4
RS8_RAT	63		896	24190	0.7014	1.04484	1.417	8	40S ribosomal protein S8 OS=Rattus norvegicus GN=Rps8 PE=1 SV=2
RS7_RAT	265		254	22113	0.6922	1.03113	1.19	6	40S ribosomal protein S7 OS=Rattus norvegicus GN=Rps7 PE=1 SV=1
RS6_RAT	79		797	28663	0.9511	1.4168	1.093	9	40S ribosomal protein S6 OS=Rattus norvegicus GN=Rps6 PE=1 SV=1
RS5_RAT	267		250	22864	0.7519	1.12007	1.035	4	40S ribosomal protein S5 OS=Rattus norvegicus GN=Rps5 PE=1 SV=3
RS4X_RAT	90		698	29579	0.8553	1.2741	1.08	13	40S ribosomal protein S4, X isoform OS=Rattus norvegicus GN=Rps4x PE=2 SV=2
RS3A_RAT	76		805	29926	0.9975	1.48592	1.171	12	40S ribosomal protein S3a OS=Rattus norvegicus GN=Rps3a PE=1 SV=2
RS3_RAT	28		1490	26657	0.9409	1.40161	1.101	19	40S ribosomal protein S3 OS=Rattus norvegicus GN=Rps3 PE=1 SV=1
RS2_RAT	80		791	31212	0.9207	1.37152	1.14	12	40S ribosomal protein S2 OS=Rattus norvegicus GN=Rps2 PE=1 SV=1
THIM_RAT	376		149	41844	0.094	0.140027	2.391	2	3-ketoacyl-CoA thiolase, mitochondrial OS=Rattus norvegicus GN=Acaa2 PE=2 SV=1
HCD2_RAT	114		577	27229	0.3236	0.48205	1.077	7	3-hydroxyacyl-CoA dehydrogenase type-2 OS=Rattus norvegicus GN=Hsd17b10 PE=1 SV=3
ODO1_RAT	232		292	116221	0.7258	1.08119	1.031	8	2-oxoglutarate dehydrogenase, mitochondrial OS=Rattus norvegicus GN=Ogdh PE=1 SV=1
1433Z_RAT	86	2	530	27754	0.6687	0.996127	1.306	7	14-3-3 protein zeta/delta OS=Rattus norvegicus GN=Ywhaz PE=1 SV=1
1433T_RAT	86	1	718	27761	0.6632	0.987934	1.261	10	14-3-3 protein theta OS=Rattus norvegicus GN=Ywhaq PE=1 SV=1
1433G_RAT	86	4	403	28285	0.6111	0.910323	1.243	9	14-3-3 protein gamma OS=Rattus norvegicus GN=Ywhag PE=1 SV=2
1433F_RAT	86	6	343	28194	0.5243	0.781022	1.176	6	14-3-3 protein eta OS=Rattus norvegicus GN=Ywhah PE=1 SV=2
1433E_RAT	86	3	440	29155	0.6837	1.01847	1.298	4	14-3-3 protein epsilon OS=Rattus norvegicus GN=Ywhae PE=1 SV=1
1433B_RAT	86	5	350	28037	0.3995	0.595114	1.238	7	14-3-3 protein beta/alpha OS=Rattus norvegicus GN=Ywhab PE=1 SV=3

## Sheet: C filtered
				Median:	0.5281
Accession	Hit numer	Member	Score	Mass	Heavy/Light Ratio	H/L Ratio Norm.	L/H Ratio Norm.	Standard deviation	pep count #	Description
ACADV_RAT	364		193	70705	306100	579625	1.72525e-06	11910	2	Very long-chain specific acyl-CoA dehydrogenase, mitochondrial OS=Rattus norvegicus GN=Acadvl PE=1 SV=1
DLG1_RAT	1	2	848	100509	7.733	14.6431	0.0682917	2.178	7	Disks large homolog 1 OS=Rattus norvegicus GN=Dlg1 PE=1 SV=1
LUZP1_RAT	25		1962	117105	2.742	5.1922	0.192597	1.489	11	Leucine zipper protein 1 OS=Rattus norvegicus GN=Luzp1 PE=1 SV=1
TPIS_RAT	123		616	26832	2.595	4.91384	0.203507	3.337	8	Triosephosphate isomerase OS=Rattus norvegicus GN=Tpi1 PE=1 SV=2
LIPA3_RAT	71	1	972	133347	1.664	3.15092	0.317368	1.026	11	Liprin-alpha-3 OS=Rattus norvegicus GN=Ppfia3 PE=1 SV=2
RL31_RAT	413		159	14454	1.598	3.02594	0.330476	1.521	2	60S ribosomal protein L31 OS=Rattus norvegicus GN=Rpl31 PE=2 SV=1
EIF3B_RAT	239		337	90854	1.299	2.45976	0.406543	1.362	5	Eukaryotic translation initiation factor 3 subunit B OS=Rattus norvegicus GN=Eif3b PE=1 SV=1
EIF3A_RAT	65		1067	163097	1.254	2.37455	0.421132	1.043	21	Eukaryotic translation initiation factor 3 subunit A OS=Rattus norvegicus GN=Eif3a PE=2 SV=2
TERA_RAT	375		182	89293	1.245	2.35751	0.424177	1.093	2	Transitional endoplasmic reticulum ATPase OS=Rattus norvegicus GN=Vcp PE=1 SV=3
ITPR1_RAT	152		519	313065	1.223	2.31585	0.431807	1.053	5	Inositol 1,4,5-trisphosphate receptor type 1 OS=Rattus norvegicus GN=Itpr1 PE=1 SV=2
RIMS1_RAT	168	1	480	179544	1.198	2.26851	0.440818	1.353	2	Regulating synaptic membrane exocytosis protein 1 OS=Rattus norvegicus GN=Rims1 PE=1 SV=1
DDX4_RAT	641		71	77906	1.16	2.19655	0.455259	1.125	2	Probable ATP-dependent RNA helicase DDX4 OS=Rattus norvegicus GN=Ddx4 PE=1 SV=1
EIF3I_RAT	263		294	36438	1.131	2.14164	0.466932	1.025	4	Eukaryotic translation initiation factor 3 subunit I OS=Rattus norvegicus GN=Eif3i PE=2 SV=1
SAFB1_RAT	352		197	104504	1.125	2.13028	0.469422	1.136	3	Scaffold attachment factor B1 OS=Rattus norvegicus GN=Safb PE=1 SV=2
SYVC_RAT	119	1	626	140280	1.076	2.03749	0.490799	1.054	3	Valine--tRNA ligase OS=Rattus norvegicus GN=Vars PE=2 SV=2
SRSF2_RAT	153		516	25461	1.059	2.0053	0.498678	1.094	4	Serine/arginine-rich splicing factor 2 OS=Rattus norvegicus GN=Srsf2 PE=1 SV=3
AIMP2_RAT	653		69	35420	1.057	2.00151	0.499622	1.171	2	Aminoacyl tRNA synthase complex-interacting multifunctional protein 2 OS=Rattus norvegicus GN=Aimp2 PE=2 SV=1
MAP1A_RAT	2	1	17184	299348	1.033	1.95607	0.511229	1.055	145	Microtubule-associated protein 1A OS=Rattus norvegicus GN=Map1a PE=1 SV=1
CAMKV_RAT	198		409	54072	0.988	1.87086	0.534514	1.106	8	CaM kinase-like vesicle-associated protein OS=Rattus norvegicus GN=Camkv PE=1 SV=1
UBP10_RAT	138		573	87257	0.988	1.87086	0.534514	1.201	12	Ubiquitin carboxyl-terminal hydrolase 10 OS=Rattus norvegicus GN=Usp10 PE=1 SV=1
DC1I1_RAT	259		295	72709	0.9855	1.86612	0.53587	1.085	2	Cytoplasmic dynein 1 intermediate chain 1 OS=Rattus norvegicus GN=Dync1i1 PE=1 SV=1
GFAP_RAT	7	11	622	49927	0.9834	1.86215	0.537014	1.479	2	Glial fibrillary acidic protein OS=Rattus norvegicus GN=Gfap PE=1 SV=2
OBSL1_RAT	1069		18	197741	0.9784	1.85268	0.539759	1.673	2	Obscurin-like protein 1 OS=Rattus norvegicus GN=Obsl1 PE=2 SV=3
TENR_RAT	91	1	791	149277	0.9705	1.83772	0.544152	1.061	4	Tenascin-R OS=Rattus norvegicus GN=Tnr PE=1 SV=1
HSP74_RAT	67	2	147	93997	0.9663	1.82977	0.546518	1.148	2	Heat shock 70 kDa protein 4 OS=Rattus norvegicus GN=Hspa4 PE=1 SV=1
PHAR1_RAT	85		830	66175	0.9621	1.82181	0.548903	1.048	6	Phosphatase and actin regulator 1 OS=Rattus norvegicus GN=Phactr1 PE=1 SV=1
RACK1_RAT	51		1269	35055	0.9597	1.81727	0.550276	1.467	13	Receptor of activated protein C kinase 1 OS=Rattus norvegicus GN=Rack1 PE=1 SV=3
RL5_RAT	29		1833	34437	0.9503	1.79947	0.555719	1.224	20	60S ribosomal protein L5 OS=Rattus norvegicus GN=Rpl5 PE=1 SV=3
HMGCL_RAT	154		516	34170	0.9387	1.7775	0.562587	1.032	6	Hydroxymethylglutaryl-CoA lyase, mitochondrial OS=Rattus norvegicus GN=Hmgcl PE=2 SV=1
KIF2A_RAT	129		606	79743	0.9354	1.77126	0.564571	1.036	9	Kinesin-like protein KIF2A OS=Rattus norvegicus GN=Kif2a PE=1 SV=2
MAP1S_RAT	220		378	102742	0.9222	1.74626	0.572652	1.088	3	Microtubule-associated protein 1S OS=Rattus norvegicus GN=Map1s PE=1 SV=1
MECP2_RAT	199		408	53015	0.9179	1.73812	0.575335	1.023	4	Methyl-CpG-binding protein 2 OS=Rattus norvegicus GN=Mecp2 PE=1 SV=1
CLH1_RAT	22		2156	191477	0.9175	1.73736	0.575586	1.032	28	Clathrin heavy chain 1 OS=Rattus norvegicus GN=Cltc PE=1 SV=3
H15_RAT	455		142	22635	0.9112	1.72543	0.579565	1.008	2	Histone H1.5 OS=Rattus norvegicus GN=Hist1h1b PE=1 SV=1
FMR1_RAT	74	1	938	66740	0.9112	1.72543	0.579565	1.055	11	Synaptic functional regulator FMR1 OS=Rattus norvegicus GN=Fmr1 PE=1 SV=2
TDRD3_RAT	271		289	72983	0.9087	1.7207	0.58116	1.084	3	Tudor domain-containing protein 3 OS=Rattus norvegicus GN=Tdrd3 PE=1 SV=1
CAPR1_RAT	69		1001	78073	0.9069	1.71729	0.582313	1.06	14	Caprin-1 OS=Rattus norvegicus GN=Caprin1 PE=1 SV=2
SYTL5_RAT	329		221	83593	0.9043	1.71237	0.583988	1.094	3	Synaptotagmin-like protein 5 OS=Rattus norvegicus GN=Sytl5 PE=2 SV=1
VIGLN_RAT	56		1209	141496	0.9039	1.71161	0.584246	1.027	20	Vigilin OS=Rattus norvegicus GN=Hdlbp PE=1 SV=1
RL28_RAT	543		100	15839	0.8958	1.69627	0.589529	1.004	2	60S ribosomal protein L28 OS=Rattus norvegicus GN=Rpl28 PE=1 SV=4
PABP1_RAT	27		1856	70656	0.8951	1.69494	0.58999	1.031	31	Polyadenylate-binding protein 1 OS=Rattus norvegicus GN=Pabpc1 PE=1 SV=1
HP1B3_RAT	200		407	60769	0.8896	1.68453	0.593638	1.037	13	Heterochromatin protein 1-binding protein 3 OS=Rattus norvegicus GN=Hp1bp3 PE=1 SV=1
E41L1_RAT	86		820	98182	0.8841	1.67411	0.597331	1.051	7	Band 4.1-like protein 1 OS=Rattus norvegicus GN=Epb41l1 PE=1 SV=1
RS3A_RAT	37		1576	29926	0.8778	1.66219	0.601618	1.208	18	40S ribosomal protein S3a OS=Rattus norvegicus GN=Rps3a PE=1 SV=2
HS71A_RAT	16	4	375	70142	0.8717	1.65063	0.605828	1.039	4	Heat shock 70 kDa protein 1A OS=Rattus norvegicus GN=Hspa1a PE=2 SV=1
CSDE1_RAT	312		236	88839	0.8512	1.61182	0.620418	1.098	5	Cold shock domain-containing protein E1 OS=Rattus norvegicus GN=Csde1 PE=2 SV=1
HSP72_RAT	16	3	993	69599	0.8496	1.60879	0.621587	1.036	8	Heat shock-related 70 kDa protein 2 OS=Rattus norvegicus GN=Hspa2 PE=1 SV=2
RL14_RAT	100		737	23324	0.8408	1.59212	0.628092	2.482	5	60S ribosomal protein L14 OS=Rattus norvegicus GN=Rpl14 PE=1 SV=3
TOP1_RAT	367	1	189	90703	0.8398	1.59023	0.62884	1.149	2	DNA topoisomerase 1 OS=Rattus norvegicus GN=Top1 PE=1 SV=1
FXR1_RAT	74	2	771	63908	0.8388	1.58834	0.62959	1.043	12	Fragile X mental retardation syndrome-related protein 1 OS=Rattus norvegicus GN=Fxr1 PE=1 SV=1
MYH10_RAT	78	1	904	228824	0.8384	1.58758	0.62989	1.1	7	Myosin-10 OS=Rattus norvegicus GN=Myh10 PE=1 SV=1
RS2_RAT	107		689	31212	0.8367	1.58436	0.63117	1.131	14	40S ribosomal protein S2 OS=Rattus norvegicus GN=Rps2 PE=1 SV=1
AP2A2_RAT	102		725	103979	0.8357	1.58247	0.631925	1.242	6	AP-2 complex subunit alpha-2 OS=Rattus norvegicus GN=Ap2a2 PE=1 SV=3
TRIM3_RAT	203		402	80745	0.8334	1.57811	0.633669	1.013	6	Tripartite motif-containing protein 3 OS=Rattus norvegicus GN=Trim3 PE=1 SV=1
RL7_RAT	63		1095	30310	0.8318	1.57508	0.634888	1.058	18	60S ribosomal protein L7 OS=Rattus norvegicus GN=Rpl7 PE=1 SV=2
AGAP2_RAT	50		1289	124361	0.8308	1.57319	0.635652	1.337	12	Arf-GAP with GTPase, ANK repeat and PH domain-containing protein 2 OS=Rattus norvegicus GN=Agap2 PE=1 SV=1
HSP7C_RAT	16	1	2496	70827	0.8282	1.56826	0.637648	1.048	28	Heat shock cognate 71 kDa protein OS=Rattus norvegicus GN=Hspa8 PE=1 SV=1
KPCG_RAT	150		521	78307	0.8282	1.56826	0.637648	1.048	8	Protein kinase C gamma type OS=Rattus norvegicus GN=Prkcg PE=1 SV=1
PPR1B_RAT	400		165	22899	0.828	1.56788	0.637802	1.064	3	Protein phosphatase 1 regulatory subunit 1B OS=Rattus norvegicus GN=Ppp1r1b PE=1 SV=1
MIC60_RAT	81	1	867	67135	0.8237	1.55974	0.641131	1.068	10	MICOS complex subunit Mic60 (Fragment) OS=Rattus norvegicus GN=Immt PE=1 SV=1
PRC2A_RAT	268		290	228908	0.819	1.55084	0.644811	1.1	3	Protein PRRC2A OS=Rattus norvegicus GN=Prrc2a PE=1 SV=1
SPTN1_RAT	13		2997	284462	0.8156	1.5444	0.647499	1.034	35	Spectrin alpha chain, non-erythrocytic 1 OS=Rattus norvegicus GN=Sptan1 PE=1 SV=2
RHG44_RAT	348		199	89058	0.8127	1.53891	0.649809	1.265	2	Rho GTPase-activating protein 44 OS=Rattus norvegicus GN=Arhgap44 PE=1 SV=2
SYRC_RAT	227		352	75762	0.8033	1.52111	0.657413	1.129	3	Arginine--tRNA ligase, cytoplasmic OS=Rattus norvegicus GN=Rars PE=1 SV=2
SPTN2_RAT	66		1065	270897	0.7996	1.51411	0.660455	1.134	7	Spectrin beta chain, non-erythrocytic 2 OS=Rattus norvegicus GN=Sptbn2 PE=1 SV=2
AGO2_RAT	101		736	97256	0.7965	1.50824	0.663026	1.035	14	Protein argonaute-2 OS=Rattus norvegicus GN=Ago2 PE=2 SV=2
GRP78_RAT	16	2	1833	72302	0.7958	1.50691	0.663609	1.045	22	78 kDa glucose-regulated protein OS=Rattus norvegicus GN=Hspa5 PE=1 SV=1
SRC8_RAT	181		446	56907	0.7949	1.50521	0.66436	1.049	8	Src substrate cortactin OS=Rattus norvegicus GN=Cttn PE=1 SV=1
RLA0_RAT	30		1814	34194	0.7912	1.4982	0.667467	1.427	18	60S acidic ribosomal protein P0 OS=Rattus norvegicus GN=Rplp0 PE=1 SV=2
MYO5A_RAT	55		1227	211630	0.7876	1.49138	0.670518	1.06	15	Unconventional myosin-Va OS=Rattus norvegicus GN=Myo5a PE=1 SV=1
AKAP5_RAT	234		348	75916	0.7856	1.4876	0.672225	1.055	3	A-kinase anchor protein 5 OS=Rattus norvegicus GN=Akap5 PE=1 SV=2
EIF3C_RAT	139		571	105369	0.7851	1.48665	0.672653	1.097	8	Eukaryotic translation initiation factor 3 subunit C OS=Rattus norvegicus GN=Eif3c PE=1 SV=1
DLG4_RAT	1	1	27581	80416	0.782	1.48078	0.67532	1.248	51	Disks large homolog 4 OS=Rattus norvegicus GN=Dlg4 PE=1 SV=1
ELAV1_RAT	160		505	36146	0.7657	1.44991	0.689696	1.134	5	ELAV-like protein 1 OS=Rattus norvegicus GN=Elavl1 PE=1 SV=1
KPCA_RAT	284	2	164	76742	0.762	1.44291	0.693045	1.164	2	Protein kinase C alpha type OS=Rattus norvegicus GN=Prkca PE=1 SV=3
KPCB_RAT	284	1	273	76701	0.762	1.44291	0.693045	1.164	2	Protein kinase C beta type OS=Rattus norvegicus GN=Prkcb PE=1 SV=3
ANK3_RAT	42		1526	284266	0.7545	1.42871	0.699934	1.074	10	Ankyrin-3 OS=Rattus norvegicus GN=Ank3 PE=1 SV=3
ARPC2_RAT	544		100	34370	0.7516	1.42322	0.702634	1.176	2	Actin-related protein 2/3 complex subunit 2 OS=Rattus norvegicus GN=Arpc2 PE=1 SV=1
LYRIC_RAT	87		813	63931	0.7499	1.42	0.704227	1.029	8	Protein LYRIC OS=Rattus norvegicus GN=Mtdh PE=1 SV=2
CAZA1_RAT	214	2	361	32889	0.7483	1.41697	0.705733	1.102	6	F-actin-capping protein subunit alpha-1 OS=Rattus norvegicus GN=Capza1 PE=1 SV=1
CXA1_RAT	671		65	43004	0.7469	1.41432	0.707056	1.283	4	Gap junction alpha-1 protein OS=Rattus norvegicus GN=Gja1 PE=1 SV=2
CTND2_RAT	301		252	28910	0.7455	1.41166	0.708384	1.284	3	Catenin delta-2 (Fragment) OS=Rattus norvegicus GN=Ctnnd2 PE=1 SV=1
AP2B1_RAT	171	1	466	104486	0.7419	1.40485	0.711821	1.073	6	AP-2 complex subunit beta OS=Rattus norvegicus GN=Ap2b1 PE=1 SV=1
DNA2_RAT	926		26	119512	0.7413	1.40371	0.712397	1.079	2	DNA replication ATP-dependent helicase/nuclease DNA2 OS=Rattus norvegicus GN=Dna2 PE=3 SV=1
SPS2L_RAT	266		290	61736	0.7304	1.38307	0.723028	1.032	2	SPATS2-like protein OS=Rattus norvegicus GN=Spats2l PE=2 SV=1
NPM_RAT	97	1	752	32540	0.7295	1.38137	0.72392	1.286	7	Nucleophosmin OS=Rattus norvegicus GN=Npm1 PE=1 SV=1
RL19_RAT	137		576	23451	0.7274	1.37739	0.72601	1.236	6	60S ribosomal protein L19 OS=Rattus norvegicus GN=Rpl19 PE=1 SV=1
RL13_RAT	82		866	24294	0.7254	1.3736	0.728012	1.575	8	60S ribosomal protein L13 OS=Rattus norvegicus GN=Rpl13 PE=1 SV=2
MARE3_RAT	327	1	222	31946	0.7214	1.36603	0.732049	1.106	2	Microtubule-associated protein RP/EB family member 3 OS=Rattus norvegicus GN=Mapre3 PE=1 SV=1
GLO2_RAT	401		165	34088	0.7198	1.363	0.733676	1.063	4	Hydroxyacylglutathione hydrolase, mitochondrial OS=Rattus norvegicus GN=Hagh PE=1 SV=2
PYGB_RAT	122	2	247	96113	0.7183	1.36016	0.735208	1.063	8	Glycogen phosphorylase, brain form (Fragment) OS=Rattus norvegicus GN=Pygb PE=1 SV=3
MBB1A_RAT	323		227	152191	0.718	1.35959	0.735515	1.211	2	Myb-binding protein 1A OS=Rattus norvegicus GN=Mybbp1a PE=1 SV=2
RS6_RAT	54		1236	28663	0.7145	1.35296	0.739118	1.063	14	40S ribosomal protein S6 OS=Rattus norvegicus GN=Rps6 PE=1 SV=1
CAPZB_RAT	244		328	30609	0.7125	1.34918	0.741193	1.085	6	F-actin-capping protein subunit beta OS=Rattus norvegicus GN=Capzb PE=1 SV=1
NXF1_RAT	500		114	70318	0.7071	1.33895	0.746853	1.351	2	Nuclear RNA export factor 1 OS=Rattus norvegicus GN=Nxf1 PE=2 SV=1
PP1A_RAT	170	2	425	37488	0.7037	1.33251	0.750462	1.187	3	Serine/threonine-protein phosphatase PP1-alpha catalytic subunit OS=Rattus norvegicus GN=Ppp1ca PE=1 SV=1
P33MX_RAT	273		286	32777	0.7029	1.331	0.751316	1.029	2	Putative monooxygenase p33MONOX OS=Rattus norvegicus GN=P33monox PE=1 SV=1
RL4_RAT	135		582	47227	0.7022	1.32967	0.752065	1.081	5	60S ribosomal protein L4 OS=Rattus norvegicus GN=Rpl4 PE=1 SV=3
CTNB1_RAT	165		482	85400	0.6986	1.32286	0.75594	1.085	2	Catenin beta-1 OS=Rattus norvegicus GN=Ctnnb1 PE=1 SV=1
EF1D_RAT	228		351	31311	0.698	1.32172	0.75659	1.208	2	Elongation factor 1-delta OS=Rattus norvegicus GN=Eef1d PE=1 SV=2
PP2AB_RAT	540		101	35552	0.6969	1.31964	0.757784	1.138	2	Serine/threonine-protein phosphatase 2A catalytic subunit beta isoform OS=Rattus norvegicus GN=Ppp2cb PE=2 SV=1
CNKR2_RAT	112	1	665	117317	0.6941	1.31433	0.760841	1.255	5	Connector enhancer of kinase suppressor of ras 2 OS=Rattus norvegicus GN=Cnksr2 PE=1 SV=1
SNPH_RAT	281		280	54460	0.6928	1.31187	0.762269	1.245	3	Syntaphilin OS=Rattus norvegicus GN=Snph PE=1 SV=1
ARHG2_RAT	45		1392	111840	0.6925	1.3113	0.762599	1.051	24	Rho guanine nucleotide exchange factor 2 OS=Rattus norvegicus GN=Arhgef2 PE=1 SV=1
PP1G_RAT	170	3	385	36960	0.6911	1.30865	0.764144	1.146	4	Serine/threonine-protein phosphatase PP1-gamma catalytic subunit OS=Rattus norvegicus GN=Ppp1cc PE=1 SV=1
CAZA2_RAT	214	1	385	32947	0.6884	1.30354	0.767141	1.044	9	F-actin-capping protein subunit alpha-2 OS=Rattus norvegicus GN=Capza2 PE=1 SV=1
HS90A_RAT	103	2	390	84762	0.687	1.30089	0.768705	1.215	2	Heat shock protein HSP 90-alpha OS=Rattus norvegicus GN=Hsp90aa1 PE=1 SV=3
PRKRA_RAT	131		599	34334	0.6858	1.29862	0.77005	1.255	11	Interferon-inducible double-stranded RNA-dependent protein kinase activator A OS=Rattus norvegicus GN=Prkra PE=1 SV=1
PYGL_RAT	122	3	164	97421	0.6849	1.29691	0.771061	1.092	4	Glycogen phosphorylase, liver form OS=Rattus norvegicus GN=Pygl PE=1 SV=5
H14_RAT	121	1	618	21974	0.6832	1.29369	0.77298	1.188	6	Histone H1.4 OS=Rattus norvegicus GN=Hist1h1e PE=1 SV=3
BSN_RAT	62		1100	418168	0.6773	1.28252	0.779714	1.146	5	Protein bassoon OS=Rattus norvegicus GN=Bsn PE=1 SV=3
PYGM_RAT	122	1	616	97212	0.6698	1.26832	0.788444	1.056	7	Glycogen phosphorylase, muscle form OS=Rattus norvegicus GN=Pygm PE=1 SV=5
ELAV2_RAT	110	1	681	39481	0.6688	1.26643	0.789623	1.099	11	ELAV-like protein 2 OS=Rattus norvegicus GN=Elavl2 PE=1 SV=1
DREB_RAT	346		200	77424	0.6678	1.26453	0.790806	1.412	3	Drebrin OS=Rattus norvegicus GN=Dbn1 PE=1 SV=3
GPDM_RAT	193		433	80921	0.6632	1.25582	0.796291	1.043	3	Glycerol-3-phosphate dehydrogenase, mitochondrial OS=Rattus norvegicus GN=Gpd2 PE=1 SV=1
LETM1_RAT	297		257	83008	0.663	1.25544	0.796531	1.058	3	Mitochondrial proton/calcium exchanger protein OS=Rattus norvegicus GN=Letm1 PE=1 SV=1
EPS8_RAT	115		656	91871	0.6598	1.24938	0.800394	1.123	5	Epidermal growth factor receptor kinase substrate 8 OS=Rattus norvegicus GN=Eps8 PE=1 SV=2
1433F_RAT	120	5	296	28194	0.6583	1.24654	0.802218	1.558	6	14-3-3 protein eta OS=Rattus norvegicus GN=Ywhah PE=1 SV=2
ZFR_RAT	331		219	116745	0.6565	1.24314	0.804417	1.631	2	Zinc finger RNA-binding protein OS=Rattus norvegicus GN=Zfr PE=1 SV=2
DYN3_RAT	94	2	434	97853	0.6547	1.23973	0.806629	1.03	5	Dynamin-3 OS=Rattus norvegicus GN=Dnm3 PE=1 SV=2
AMPH_RAT	225	2	251	74832	0.6511	1.23291	0.811089	1.1	5	Amphiphysin OS=Rattus norvegicus GN=Amph PE=1 SV=1
PURB_RAT	92		786	33398	0.65	1.23083	0.812462	1.188	12	Transcriptional activator protein Pur-beta OS=Rattus norvegicus GN=Purb PE=1 SV=3
DYN2_RAT	94	3	336	98169	0.6463	1.22382	0.817113	1.036	4	Dynamin-2 OS=Rattus norvegicus GN=Dnm2 PE=1 SV=1
EIF3D_RAT	287		269	63948	0.6402	1.21227	0.824898	1.033	3	Eukaryotic translation initiation factor 3 subunit D OS=Rattus norvegicus GN=Eif3d PE=1 SV=1
DHX30_RAT	41		1551	133913	0.6392	1.21038	0.826189	1.04	29	Putative ATP-dependent RNA helicase DHX30 OS=Rattus norvegicus GN=Dhx30 PE=1 SV=1
NUCL_RAT	39		1567	77101	0.6382	1.20848	0.827484	1.088	21	Nucleolin OS=Rattus norvegicus GN=Ncl PE=1 SV=3
S61A1_RAT	505		112	52231	0.6374	1.20697	0.828522	1.32	3	Protein transport protein Sec61 subunit alpha isoform 1 OS=Rattus norvegicus GN=Sec61a1 PE=2 SV=2
SYNJ1_RAT	73		947	172773	0.6374	1.20697	0.828522	1.033	14	Synaptojanin-1 OS=Rattus norvegicus GN=Synj1 PE=1 SV=3
ELAV4_RAT	110	2	676	40938	0.6356	1.20356	0.830868	1.098	11	ELAV-like protein 4 OS=Rattus norvegicus GN=Elavl4 PE=1 SV=1
FARP1_RAT	146		550	118768	0.6313	1.19542	0.836528	1.145	6	FERM, RhoGEF and pleckstrin domain-containing protein 1 OS=Rattus norvegicus GN=Farp1 PE=1 SV=2
DDB1_RAT	441		148	126781	0.6302	1.19333	0.837988	1.246	2	DNA damage-binding protein 1 OS=Rattus norvegicus GN=Ddb1 PE=1 SV=1
MAP1B_RAT	2	2	4732	269334	0.6297	1.19239	0.838653	1.104	45	Microtubule-associated protein 1B OS=Rattus norvegicus GN=Map1b PE=1 SV=2
PP1B_RAT	170	1	469	37163	0.6296	1.1922	0.838787	1.123	4	Serine/threonine-protein phosphatase PP1-beta catalytic subunit OS=Rattus norvegicus GN=Ppp1cb PE=1 SV=3
DPYL1_RAT	35	2	912	62157	0.6292	1.19144	0.83932	1.201	9	Dihydropyrimidinase-related protein 1 OS=Rattus norvegicus GN=Crmp1 PE=1 SV=1
CALD1_RAT	76		919	60548	0.6275	1.18822	0.841594	1.123	8	Non-muscle caldesmon OS=Rattus norvegicus GN=Cald1 PE=1 SV=1
HS90B_RAT	103	1	700	83229	0.6255	1.18443	0.844285	1.116	5	Heat shock protein HSP 90-beta OS=Rattus norvegicus GN=Hsp90ab1 PE=1 SV=4
BIN1_RAT	225	1	358	64493	0.6252	1.18387	0.84469	1.027	5	Myc box-dependent-interacting protein 1 OS=Rattus norvegicus GN=Bin1 PE=1 SV=1
PAK5_RAT	217		381	80898	0.625	1.18349	0.84496	1.132	4	Serine/threonine-protein kinase PAK 5 OS=Rattus norvegicus GN=Pak5 PE=1 SV=1
OPA1_RAT	59		1127	111238	0.6221	1.178	0.848899	1.032	23	Dynamin-like 120 kDa protein, mitochondrial OS=Rattus norvegicus GN=Opa1 PE=1 SV=1
VDAC2_RAT	126	1	613	31726	0.6214	1.17667	0.849855	1.236	6	Voltage-dependent anion-selective channel protein 2 OS=Rattus norvegicus GN=Vdac2 PE=1 SV=2
RL7A_RAT	53		1252	29977	0.6212	1.17629	0.850129	1.063	14	60S ribosomal protein L7a OS=Rattus norvegicus GN=Rpl7a PE=1 SV=2
GSTA4_RAT	24	2	892	25493	0.6196	1.17326	0.852324	1.114	14	Glutathione S-transferase alpha-4 OS=Rattus norvegicus GN=Gsta4 PE=1 SV=2
MFF_RAT	166		481	24955	0.618	1.17023	0.854531	1.209	2	Mitochondrial fission factor OS=Rattus norvegicus GN=Mff PE=1 SV=1
SYNPO_RAT	190		439	99924	0.618	1.17023	0.854531	1.122	9	Synaptopodin OS=Rattus norvegicus GN=Synpo PE=1 SV=2
RL18_RAT	31		1811	21645	0.6166	1.16758	0.856471	1.109	10	60S ribosomal protein L18 OS=Rattus norvegicus GN=Rpl18 PE=1 SV=2
GELS_RAT	269		290	86014	0.6155	1.1655	0.858002	1.75	2	Gelsolin OS=Rattus norvegicus GN=Gsn PE=1 SV=1
PPM1E_RAT	387		175	83386	0.6146	1.16379	0.859258	1.038	2	Protein phosphatase 1E OS=Rattus norvegicus GN=Ppm1e PE=1 SV=1
CLAP2_RAT	14		2690	140551	0.6131	1.16095	0.86136	1.192	28	CLIP-associating protein 2 OS=Rattus norvegicus GN=Clasp2 PE=1 SV=1
HNRPL_RAT	561		94	67860	0.6101	1.15527	0.865596	1.088	2	Heterogeneous nuclear ribonucleoprotein L OS=Rattus norvegicus GN=Hnrnpl PE=1 SV=2
RSSA_RAT	17		2462	32803	0.6094	1.15395	0.86659	1.184	15	40S ribosomal protein SA OS=Rattus norvegicus GN=Rpsa PE=1 SV=3
RPGF2_RAT	206		397	166284	0.6092	1.15357	0.866875	1.089	3	Rap guanine nucleotide exchange factor 2 OS=Rattus norvegicus GN=Rapgef2 PE=1 SV=2
SYGP1_RAT	155	1	513	144631	0.6092	1.15357	0.866875	1.172	5	Ras/Rap GTPase-activating protein SynGAP OS=Rattus norvegicus GN=Syngap1 PE=1 SV=2
RL6_RAT	28		1855	33541	0.609	1.15319	0.867159	1.144	20	60S ribosomal protein L6 OS=Rattus norvegicus GN=Rpl6 PE=1 SV=5
LANC1_RAT	15		2625	45210	0.6085	1.15224	0.867872	1.263	18	LanC-like protein 1 OS=Rattus norvegicus GN=Lancl1 PE=1 SV=2
HNRPQ_RAT	247		321	59674	0.6067	1.14884	0.870447	1.168	4	Heterogeneous nuclear ribonucleoprotein Q OS=Rattus norvegicus GN=Syncrip PE=2 SV=1
NMDE2_RAT	369		188	165965	0.6065	1.14846	0.870734	1.087	2	Glutamate receptor ionotropic, NMDA 2B OS=Rattus norvegicus GN=Grin2b PE=1 SV=1
GTPB1_RAT	148		535	72443	0.6062	1.14789	0.871165	1.656	3	GTP-binding protein 1 OS=Rattus norvegicus GN=Gtpbp1 PE=1 SV=1
GRP75_RAT	75		934	73812	0.6041	1.14391	0.874193	1.031	20	Stress-70 protein, mitochondrial OS=Rattus norvegicus GN=Hspa9 PE=1 SV=3
ADDA_RAT	99	1	739	80305	0.6018	1.13956	0.877534	1.162	2	Alpha-adducin OS=Rattus norvegicus GN=Add1 PE=1 SV=2
DYN1_RAT	94	1	770	97234	0.6012	1.13842	0.87841	1.045	16	Dynamin-1 OS=Rattus norvegicus GN=Dnm1 PE=1 SV=2
DGKZ_RAT	319		232	103943	0.6007	1.13747	0.879141	1.139	4	Diacylglycerol kinase zeta OS=Rattus norvegicus GN=Dgkz PE=1 SV=1
WDR7_RAT	64		1089	163086	0.5994	1.13501	0.881048	1.041	16	WD repeat-containing protein 7 OS=Rattus norvegicus GN=Wdr7 PE=1 SV=1
LRRC7_RAT	95		766	166774	0.5979	1.13217	0.883258	1.101	8	Leucine-rich repeat-containing protein 7 OS=Rattus norvegicus GN=Lrrc7 PE=1 SV=2
RL9_RAT	256		301	21880	0.5973	1.13104	0.884145	1.13	5	60S ribosomal protein L9 OS=Rattus norvegicus GN=Rpl9 PE=1 SV=1
WDR6_RAT	376		181	121858	0.5932	1.12327	0.890256	1.136	2	WD repeat-containing protein 6 OS=Rattus norvegicus GN=Wdr6 PE=1 SV=2
1433T_RAT	120	2	617	27761	0.5915	1.12005	0.892815	4.072	5	14-3-3 protein theta OS=Rattus norvegicus GN=Ywhaq PE=1 SV=1
TRIO_RAT	248		316	347642	0.5915	1.12005	0.892815	1.274	3	Triple functional domain protein OS=Rattus norvegicus GN=Trio PE=1 SV=4
GSTA6_RAT	24	3	824	25791	0.5824	1.10282	0.906765	1.114	13	Glutathione S-transferase A6 OS=Rattus norvegicus GN=Gsta6 PE=1 SV=1
IRS1_RAT	161		502	131096	0.5803	1.09884	0.910047	2.271	4	Insulin receptor substrate 1 OS=Rattus norvegicus GN=Irs1 PE=1 SV=1
PTN11_RAT	309		239	68415	0.5796	1.09752	0.911146	1.047	3	Tyrosine-protein phosphatase non-receptor type 11 OS=Rattus norvegicus GN=Ptpn11 PE=1 SV=4
HNRPM_RAT	43		1440	73733	0.5736	1.08616	0.920676	1.047	13	Heterogeneous nuclear ribonucleoprotein M OS=Rattus norvegicus GN=Hnrnpm PE=1 SV=4
ODO1_RAT	280		281	116221	0.5731	1.08521	0.92148	1.079	5	2-oxoglutarate dehydrogenase, mitochondrial OS=Rattus norvegicus GN=Ogdh PE=1 SV=1
EIF3G_RAT	337		214	35629	0.5685	1.0765	0.928936	1.043	2	Eukaryotic translation initiation factor 3 subunit G OS=Rattus norvegicus GN=Eif3g PE=1 SV=1
EF2_RAT	113		664	95223	0.5669	1.07347	0.931558	1.107	7	Elongation factor 2 OS=Rattus norvegicus GN=Eef2 PE=1 SV=4
AP180_RAT	182	1	445	93460	0.5648	1.06949	0.935021	1.188	4	Clathrin coat assembly protein AP180 OS=Rattus norvegicus GN=Snap91 PE=1 SV=1
VDAC3_RAT	126	2	328	30778	0.5633	1.06665	0.937511	1.193	4	Voltage-dependent anion-selective channel protein 3 OS=Rattus norvegicus GN=Vdac3 PE=1 SV=2
MTAP2_RAT	6	1	5324	202288	0.5627	1.06552	0.938511	1.05	39	Microtubule-associated protein 2 OS=Rattus norvegicus GN=Map2 PE=1 SV=3
RL15_RAT	221		372	24131	0.5617	1.06362	0.940182	1.234	6	60S ribosomal protein L15 OS=Rattus norvegicus GN=Rpl15 PE=1 SV=2
CSKI1_RAT	127		611	150255	0.5613	1.06287	0.940852	1.03	11	Caskin-1 OS=Rattus norvegicus GN=Caskin1 PE=1 SV=1
RS8_RAT	70		993	24190	0.5601	1.06059	0.942867	1.117	13	40S ribosomal protein S8 OS=Rattus norvegicus GN=Rps8 PE=1 SV=2
SND1_RAT	90		797	101888	0.56	1.06041	0.943036	1.088	6	Staphylococcal nuclease domain-containing protein 1 OS=Rattus norvegicus GN=Snd1 PE=1 SV=1
APC_RAT	47		1355	310342	0.558	1.05662	0.946416	1.095	7	Adenomatous polyposis coli protein OS=Rattus norvegicus GN=Apc PE=1 SV=1
MAP6_RAT	9		4308	100423	0.5579	1.05643	0.946585	1.048	44	Microtubule-associated protein 6 OS=Rattus norvegicus GN=Map6 PE=1 SV=1
HS105_RAT	67	1	1053	96357	0.5541	1.04923	0.953077	1.373	10	Heat shock protein 105 kDa OS=Rattus norvegicus GN=Hsph1 PE=1 SV=1
ODP2_RAT	257		300	67123	0.546	1.0339	0.967216	1.242	2	Dihydrolipoyllysine-residue acetyltransferase component of pyruvate dehydrogenase complex, mitochondrial OS=Rattus norvegicus GN=Dlat PE=1 SV=3
SMBP2_RAT	204		401	108373	0.5457	1.03333	0.967748	1.045	4	DNA-binding protein SMUBP-2 OS=Rattus norvegicus GN=Ighmbp2 PE=1 SV=1
PHB2_RAT	226		358	33292	0.5436	1.02935	0.971486	1.042	2	Prohibitin-2 OS=Rattus norvegicus GN=Phb2 PE=1 SV=1
MARK2_RAT	32	1	1783	80821	0.5425	1.02727	0.973456	1.372	23	Serine/threonine-protein kinase MARK2 OS=Rattus norvegicus GN=Mark2 PE=1 SV=1
NCKP1_RAT	84		830	128781	0.5391	1.02083	0.979596	1.051	14	Nck-associated protein 1 OS=Rattus norvegicus GN=Nckap1 PE=2 SV=1
ROA3_RAT	162	1	486	39628	0.539	1.02064	0.979777	1.321	10	Heterogeneous nuclear ribonucleoprotein A3 OS=Rattus norvegicus GN=Hnrnpa3 PE=1 SV=1
GLRX3_RAT	183		445	37825	0.5389	1.02045	0.979959	1.098	7	Glutaredoxin-3 OS=Rattus norvegicus GN=Glrx3 PE=1 SV=2
RL10A_RAT	80	1	890	24816	0.5372	1.01723	0.98306	1.147	9	60S ribosomal protein L10a OS=Rattus norvegicus GN=Rpl10a PE=1 SV=2
VDAC1_RAT	255		302	30737	0.5344	1.01193	0.988211	1.13	3	Voltage-dependent anion-selective channel protein 1 OS=Rattus norvegicus GN=Vdac1 PE=1 SV=4
NSF_RAT	46		1389	82600	0.5299	1.00341	0.996603	1.053	28	Vesicle-fusing ATPase OS=Rattus norvegicus GN=Nsf PE=1 SV=1
GSTA1_RAT	24	4	557	25591	0.5263	0.996592	1.00342	1.383	5	Glutathione S-transferase alpha-1 OS=Rattus norvegicus GN=Gsta1 PE=1 SV=3
RL10_RAT	134		583	24588	0.525	0.99413	1.0059	1.144	7	60S ribosomal protein L10 OS=Rattus norvegicus GN=Rpl10 PE=1 SV=3
MCR_RAT	6	2	67	106669	0.5241	0.992426	1.00763	1.266	2	Mineralocorticoid receptor OS=Rattus norvegicus GN=Nr3c2 PE=1 SV=1
ATAT_RAT	88		804	47298	0.5239	0.992047	1.00802	1.081	12	Alpha-tubulin N-acetyltransferase 1 OS=Rattus norvegicus GN=Atat1 PE=1 SV=1
NCDN_RAT	133		585	78873	0.52	0.984662	1.01558	1.14	2	Neurochondrin OS=Rattus norvegicus GN=Ncdn PE=1 SV=2
ROGDI_RAT	250		305	32185	0.5184	0.981632	1.01871	1.085	3	Protein rogdi homolog OS=Rattus norvegicus GN=Rogdi PE=2 SV=1
GPX1_RAT	326		226	22292	0.5178	0.980496	1.01989	1.155	6	Glutathione peroxidase 1 OS=Rattus norvegicus GN=Gpx1 PE=1 SV=4
MATR3_RAT	445		146	94389	0.5176	0.980117	1.02029	1.379	2	Matrin-3 OS=Rattus norvegicus GN=Matr3 PE=1 SV=2
DNM1L_RAT	245		323	83856	0.5174	0.979739	1.02068	1.168	2	Dynamin-1-like protein OS=Rattus norvegicus GN=Dnm1l PE=1 SV=1
TRIM9_RAT	141		569	79155	0.5155	0.976141	1.02444	1.135	3	E3 ubiquitin-protein ligase TRIM9 OS=Rattus norvegicus GN=Trim9 PE=1 SV=1
1433E_RAT	120	4	460	29155	0.5152	0.975573	1.02504	1.486	5	14-3-3 protein epsilon OS=Rattus norvegicus GN=Ywhae PE=1 SV=1
PI51B_RAT	274	3	106	60695	0.511	0.96762	1.03346	1.092	2	Phosphatidylinositol 4-phosphate 5-kinase type-1 beta OS=Rattus norvegicus GN=Pip5k1b PE=1 SV=1
RS9_RAT	144		565	22578	0.5074	0.960803	1.0408	1.125	15	40S ribosomal protein S9 OS=Rattus norvegicus GN=Rps9 PE=1 SV=4
NUMBL_RAT	191	1	438	65472	0.5073	0.960614	1.041	1.059	4	Numb-like protein OS=Rattus norvegicus GN=Numbl PE=1 SV=1
RL17_RAT	236		341	21383	0.5045	0.955311	1.04678	1.127	6	60S ribosomal protein L17 OS=Rattus norvegicus GN=Rpl17 PE=2 SV=3
GSTM2_RAT	4	4	3174	25686	0.5042	0.954743	1.0474	1.148	22	Glutathione S-transferase Mu 2 OS=Rattus norvegicus GN=Gstm2 PE=1 SV=2
FBRL_RAT	892		28	34201	0.5032	0.95285	1.04948	1.026	2	rRNA 2'-O-methyltransferase fibrillarin OS=Rattus norvegicus GN=Fbl PE=1 SV=2
GSTM4_RAT	4	2	5601	25664	0.5028	0.952092	1.05032	1.112	24	Glutathione S-transferase Yb-3 OS=Rattus norvegicus GN=Gstm3 PE=1 SV=2
AT1A2_RAT	10	2	3402	112145	0.5013	0.949252	1.05346	1.096	24	Sodium/potassium-transporting ATPase subunit alpha-2 OS=Rattus norvegicus GN=Atp1a2 PE=1 SV=1
RL24_RAT	167		480	17768	0.5004	0.947548	1.05536	1.039	2	60S ribosomal protein L24 OS=Rattus norvegicus GN=Rpl24 PE=2 SV=1
AT1A3_RAT	10	1	3871	111620	0.4979	0.942814	1.06065	1.077	26	Sodium/potassium-transporting ATPase subunit alpha-3 OS=Rattus norvegicus GN=Atp1a3 PE=1 SV=2
SYYC_RAT	172		465	59078	0.4959	0.939027	1.06493	1.081	6	Tyrosine--tRNA ligase, cytoplasmic OS=Rattus norvegicus GN=Yars PE=2 SV=3
AT2B1_RAT	49	1	1305	138632	0.4944	0.936186	1.06816	1.091	14	Plasma membrane calcium-transporting ATPase 1 OS=Rattus norvegicus GN=Atp2b1 PE=1 SV=2
RP3A_RAT	57		1189	75785	0.4939	0.93524	1.06924	1.098	20	Rabphilin-3A OS=Rattus norvegicus GN=Rph3a PE=1 SV=1
GSTM1_RAT	4	1	6375	25897	0.4907	0.92918	1.07622	1.183	26	Glutathione S-transferase Mu 1 OS=Rattus norvegicus GN=Gstm1 PE=1 SV=2
DLGP2_RAT	125	1	615	118903	0.4903	0.928423	1.0771	1.208	3	Disks large-associated protein 2 OS=Rattus norvegicus GN=Dlgap2 PE=1 SV=3
STX1B_RAT	358		195	33224	0.4871	0.922363	1.08417	1.716	2	Syntaxin-1B OS=Rattus norvegicus GN=Stx1b PE=1 SV=1
DGKB_RAT	253	1	303	90229	0.4855	0.919333	1.08774	1.012	2	Diacylglycerol kinase beta OS=Rattus norvegicus GN=Dgkb PE=1 SV=1
MARK1_RAT	32	3	948	88180	0.4846	0.917629	1.08976	1.38	18	Serine/threonine-protein kinase MARK1 OS=Rattus norvegicus GN=Mark1 PE=1 SV=1
AT1A1_RAT	10	3	3145	112982	0.4829	0.91441	1.0936	1.095	22	Sodium/potassium-transporting ATPase subunit alpha-1 OS=Rattus norvegicus GN=Atp1a1 PE=1 SV=1
CAH2_RAT	690		59	29096	0.4816	0.911948	1.09655	1.156	3	Carbonic anhydrase 2 OS=Rattus norvegicus GN=Ca2 PE=1 SV=2
GLNA_RAT	117		641	42240	0.4815	0.911759	1.09678	1.148	8	Glutamine synthetase OS=Rattus norvegicus GN=Glul PE=1 SV=3
EIF3H_RAT	522		106	39880	0.4797	0.908351	1.1009	1.66	3	Eukaryotic translation initiation factor 3 subunit H OS=Rattus norvegicus GN=Eif3h PE=1 SV=1
CPT1A_RAT	157		510	88069	0.4791	0.907215	1.10228	1.096	3	Carnitine O-palmitoyltransferase 1, liver isoform OS=Rattus norvegicus GN=Cpt1a PE=1 SV=2
RS5_RAT	495		114	22864	0.4786	0.906268	1.10343	1.103	3	40S ribosomal protein S5 OS=Rattus norvegicus GN=Rps5 PE=1 SV=3
ALDOA_RAT	233	1	349	39327	0.4786	0.906268	1.10343	1.012	3	Fructose-bisphosphate aldolase A OS=Rattus norvegicus GN=Aldoa PE=1 SV=2
PRPS1_RAT	306		246	34812	0.4763	0.901913	1.10875	1.171	2	Ribose-phosphate pyrophosphokinase 1 OS=Rattus norvegicus GN=Prps1 PE=1 SV=2
ACON_RAT	44		1417	85380	0.4756	0.900587	1.11039	1.039	18	Aconitate hydratase, mitochondrial OS=Rattus norvegicus GN=Aco2 PE=1 SV=2
GSTA3_RAT	24	1	2011	25303	0.4752	0.89983	1.11132	1.28	19	Glutathione S-transferase alpha-3 OS=Rattus norvegicus GN=Gsta3 PE=1 SV=3
STAU2_RAT	186		441	62642	0.4742	0.897936	1.11367	1.105	5	Double-stranded RNA-binding protein Staufen homolog 2 OS=Rattus norvegicus GN=Stau2 PE=1 SV=1
GSTM5_RAT	4	3	5280	26611	0.4741	0.897747	1.1139	1.302	22	Glutathione S-transferase Mu 5 OS=Rattus norvegicus GN=Gstm5 PE=1 SV=3
NEDD4_RAT	293		262	102331	0.4737	0.896989	1.11484	1.045	2	E3 ubiquitin-protein ligase NEDD4 OS=Rattus norvegicus GN=Nedd4 PE=1 SV=1
SEPT5_RAT	380		179	42825	0.4712	0.892255	1.12076	1.142	2	Septin-5 OS=Rattus norvegicus GN=Sept5 PE=1 SV=2
WASF1_RAT	184		443	61477	0.4704	0.89074	1.12266	1.421	3	Wiskott-Aldrich syndrome protein family member 1 OS=Rattus norvegicus GN=Wasf1 PE=1 SV=1
PI51A_RAT	274	1	285	60567	0.4698	0.889604	1.1241	1.191	2	Phosphatidylinositol 4-phosphate 5-kinase type-1 alpha OS=Rattus norvegicus GN=Pip5k1a PE=2 SV=1
GIT1_RAT	349		198	85178	0.4684	0.886953	1.12746	1.143	2	ARF GTPase-activating protein GIT1 OS=Rattus norvegicus GN=Git1 PE=1 SV=1
AT2B4_RAT	49	4	610	133010	0.4635	0.877675	1.13937	1.061	8	Plasma membrane calcium-transporting ATPase 4 OS=Rattus norvegicus GN=Atp2b4 PE=1 SV=1
RS27A_RAT	188		440	17939	0.4586	0.868396	1.15155	1.049	2	Ubiquitin-40S ribosomal protein S27a OS=Rattus norvegicus GN=Rps27a PE=1 SV=2
GPM6A_RAT	479		124	31174	0.4543	0.860254	1.16245	1.106	2	Neuronal membrane glycoprotein M6-a OS=Rattus norvegicus GN=Gpm6a PE=1 SV=1
1433Z_RAT	120	1	620	27754	0.4515	0.854952	1.16966	2.421	6	14-3-3 protein zeta/delta OS=Rattus norvegicus GN=Ywhaz PE=1 SV=1
RS4X_RAT	34		1698	29579	0.4499	0.851922	1.17382	1.347	22	40S ribosomal protein S4, X isoform OS=Rattus norvegicus GN=Rps4x PE=2 SV=2
PURA_RAT	104		698	15313	0.4484	0.849082	1.17774	1.407	9	Transcriptional activator protein Pur-alpha (Fragments) OS=Rattus norvegicus GN=Pura PE=1 SV=1
RL13A_RAT	124		615	23461	0.4458	0.844158	1.18461	1.269	6	60S ribosomal protein L13a OS=Rattus norvegicus GN=Rpl13a PE=1 SV=2
AT2B3_RAT	49	3	998	138471	0.4432	0.839235	1.19156	1.067	11	Plasma membrane calcium-transporting ATPase 3 OS=Rattus norvegicus GN=Atp2b3 PE=1 SV=2
ACLY_RAT	238		339	120559	0.4428	0.838478	1.19264	1.179	4	ATP-citrate synthase OS=Rattus norvegicus GN=Acly PE=1 SV=1
LONM_RAT	147		547	105726	0.4392	0.831661	1.20241	1.216	3	Lon protease homolog, mitochondrial OS=Rattus norvegicus GN=Lonp1 PE=2 SV=1
GRB2_RAT	425		155	25190	0.4372	0.827874	1.20791	1.334	3	Growth factor receptor-bound protein 2 OS=Rattus norvegicus GN=Grb2 PE=1 SV=1
NAA35_RAT	302		252	83155	0.4277	0.809884	1.23474	1.184	2	N-alpha-acetyltransferase 35, NatC auxiliary subunit OS=Rattus norvegicus GN=Naa35 PE=1 SV=1
MARK3_RAT	32	2	990	88696	0.4276	0.809695	1.23503	1.393	19	MAP/microtubule affinity-regulating kinase 3 OS=Rattus norvegicus GN=Mark3 PE=1 SV=1
GBB1_RAT	159	1	506	37353	0.4238	0.8025	1.24611	1.053	10	Guanine nucleotide-binding protein G(I)/G(S)/G(T) subunit beta-1 OS=Rattus norvegicus GN=Gnb1 PE=1 SV=4
MAP4_RAT	36		1644	110233	0.4231	0.801174	1.24817	1.105	11	Microtubule-associated protein 4 OS=Rattus norvegicus GN=Map4 PE=1 SV=1
ECHA_RAT	52		1266	82613	0.4229	0.800795	1.24876	1.029	16	Trifunctional enzyme subunit alpha, mitochondrial OS=Rattus norvegicus GN=Hadha PE=1 SV=2
GBB2_RAT	159	2	281	37307	0.4187	0.792842	1.26128	1.139	8	Guanine nucleotide-binding protein G(I)/G(S)/G(T) subunit beta-2 OS=Rattus norvegicus GN=Gnb2 PE=1 SV=4
INP5E_RAT	208		394	72193	0.4184	0.792274	1.26219	1.279	2	72 kDa inositol polyphosphate 5-phosphatase OS=Rattus norvegicus GN=Inpp5e PE=1 SV=2
KIF5A_RAT	290	1	265	116843	0.4177	0.790949	1.2643	1.301	2	Kinesin heavy chain isoform 5A OS=Rattus norvegicus GN=Kif5a PE=1 SV=1
RS7_RAT	187		441	22113	0.416	0.78773	1.26947	1.089	9	40S ribosomal protein S7 OS=Rattus norvegicus GN=Rps7 PE=1 SV=1
S12A5_RAT	72		959	126165	0.414	0.783942	1.2756	1.03	10	Solute carrier family 12 member 5 OS=Rattus norvegicus GN=Slc12a5 PE=1 SV=2
AT2B2_RAT	49	2	1269	136724	0.4135	0.782996	1.27715	1.098	16	Plasma membrane calcium-transporting ATPase 2 OS=Rattus norvegicus GN=Atp2b2 PE=1 SV=2
PFKAP_RAT	26	1	1888	85665	0.4127	0.781481	1.27962	1.045	24	ATP-dependent 6-phosphofructokinase, platelet type OS=Rattus norvegicus GN=Pfkp PE=1 SV=2
1433G_RAT	120	3	479	28285	0.4125	0.781102	1.28024	1.606	8	14-3-3 protein gamma OS=Rattus norvegicus GN=Ywhag PE=1 SV=2
RL21_RAT	378		180	18454	0.4108	0.777883	1.28554	1.092	4	60S ribosomal protein L21 OS=Rattus norvegicus GN=Rpl21 PE=1 SV=3
DPYL2_RAT	35	1	1651	62239	0.4104	0.777126	1.28679	1.194	15	Dihydropyrimidinase-related protein 2 OS=Rattus norvegicus GN=Dpysl2 PE=1 SV=1
MAST1_RAT	128	1	609	170923	0.4091	0.774664	1.29088	1.055	8	Microtubule-associated serine/threonine-protein kinase 1 OS=Rattus norvegicus GN=Mast1 PE=1 SV=1
RL8_RAT	83		844	28007	0.4078	0.772202	1.295	1.084	12	60S ribosomal protein L8 OS=Rattus norvegicus GN=Rpl8 PE=2 SV=2
NFL_RAT	7	12	239	61298	0.4063	0.769362	1.29978	1.115	3	Neurofilament light polypeptide OS=Rattus norvegicus GN=Nefl PE=1 SV=3
DDX1_RAT	33		1712	82445	0.4006	0.758568	1.31827	1.043	19	ATP-dependent RNA helicase DDX1 OS=Rattus norvegicus GN=Ddx1 PE=1 SV=1
SAHH2_RAT	440		148	53719	0.3944	0.746828	1.339	1.146	2	S-adenosylhomocysteine hydrolase-like protein 1 OS=Rattus norvegicus GN=Ahcyl1 PE=1 SV=2
MYPR_RAT	324		226	30057	0.3943	0.746639	1.33934	1.254	2	Myelin proteolipid protein OS=Rattus norvegicus GN=Plp1 PE=1 SV=2
CBR1_RAT	130		599	30559	0.3909	0.740201	1.35098	1.183	10	Carbonyl reductase [NADPH] 1 OS=Rattus norvegicus GN=Cbr1 PE=1 SV=2
SEPT3_RAT	325		226	40572	0.39	0.738496	1.3541	1.031	3	Neuronal-specific septin-3 OS=Rattus norvegicus GN=Sept3 PE=1 SV=2
TOM70_RAT	384		178	67402	0.3888	0.736224	1.35828	1.213	2	Mitochondrial import receptor subunit TOM70 OS=Rattus norvegicus GN=Tomm70 PE=1 SV=1
MRCKB_RAT	116	2	558	194765	0.387	0.732816	1.3646	1.214	2	Serine/threonine-protein kinase MRCK beta OS=Rattus norvegicus GN=Cdc42bpb PE=1 SV=1
ARFG3_RAT	321		228	57635	0.3822	0.723727	1.38174	1.084	2	ADP-ribosylation factor GTPase-activating protein 3 OS=Rattus norvegicus GN=Arfgap3 PE=1 SV=1
AT2A2_RAT	89		798	114694	0.3814	0.722212	1.38464	1.238	8	Sarcoplasmic/endoplasmic reticulum calcium ATPase 2 OS=Rattus norvegicus GN=Atp2a2 PE=1 SV=1
EAA2_RAT	48		1341	62066	0.3791	0.717856	1.39304	1.229	5	Excitatory amino acid transporter 2 OS=Rattus norvegicus GN=Slc1a2 PE=1 SV=2
TOP2A_RAT	354		197	173112	0.3783	0.716342	1.39598	1.116	2	DNA topoisomerase 2-alpha OS=Rattus norvegicus GN=Top2a PE=1 SV=1
BCAS1_RAT	277		283	58588	0.378	0.715774	1.39709	1.118	7	Breast carcinoma-amplified sequence 1 homolog (Fragment) OS=Rattus norvegicus GN=Bcas1 PE=1 SV=2
MINK1_RAT	61		1115	150289	0.3777	0.715205	1.3982	1.095	15	Misshapen-like kinase 1 OS=Rattus norvegicus GN=Mink1 PE=1 SV=2
GSTP1_RAT	3	1	6528	23424	0.3705	0.701572	1.42537	1.235	11	Glutathione S-transferase P OS=Rattus norvegicus GN=Gstp1 PE=1 SV=2
PGAM5_RAT	262		294	32041	0.37	0.700625	1.4273	1.099	8	Serine/threonine-protein phosphatase PGAM5, mitochondrial OS=Rattus norvegicus GN=Pgam5 PE=2 SV=1
GRPE1_RAT	96		758	24282	0.3682	0.697216	1.43427	1.061	11	GrpE protein homolog 1, mitochondrial OS=Rattus norvegicus GN=Grpel1 PE=1 SV=2
SNP25_RAT	261		294	23300	0.3643	0.689831	1.44963	1.201	4	Synaptosomal-associated protein 25 OS=Rattus norvegicus GN=Snap25 PE=1 SV=1
UBXN1_RAT	560		94	33561	0.364	0.689263	1.45082	1.433	2	UBX domain-containing protein 1 OS=Rattus norvegicus GN=Ubxn1 PE=3 SV=2
MK01_RAT	177		456	41249	0.3624	0.686234	1.45723	1.093	8	Mitogen-activated protein kinase 1 OS=Rattus norvegicus GN=Mapk1 PE=1 SV=3
RL11_RAT	179		447	20240	0.3567	0.67544	1.48052	1.03	3	60S ribosomal protein L11 OS=Rattus norvegicus GN=Rpl11 PE=1 SV=2
GARS_RAT	311		236	71984	0.3558	0.673736	1.48426	1.506	2	Glycine--tRNA ligase (Fragment) OS=Rattus norvegicus GN=Gars PE=1 SV=1
MBP_RAT	19		2369	21489	0.3543	0.670896	1.49054	1.432	12	Myelin basic protein OS=Rattus norvegicus GN=Mbp PE=1 SV=3
HXK1_RAT	158		508	102342	0.3529	0.668245	1.49646	1.296	3	Hexokinase-1 OS=Rattus norvegicus GN=Hk1 PE=1 SV=4
ACSL6_RAT	169	1	471	78130	0.3524	0.667298	1.49858	1.071	5	Long-chain-fatty-acid--CoA ligase 6 OS=Rattus norvegicus GN=Acsl6 PE=1 SV=1
GNAO_RAT	93	1	774	40043	0.3481	0.659155	1.51709	1.09	9	Guanine nucleotide-binding protein G(o) subunit alpha OS=Rattus norvegicus GN=Gnao1 PE=1 SV=2
PFKAL_RAT	26	3	763	85284	0.3461	0.655368	1.52586	1.107	9	ATP-dependent 6-phosphofructokinase, liver type OS=Rattus norvegicus GN=Pfkl PE=1 SV=3
ACTC_RAT	40	3	1053	41992	0.3454	0.654043	1.52895	1.173	10	Actin, alpha cardiac muscle 1 OS=Rattus norvegicus GN=Actc1 PE=2 SV=1
TAU_RAT	254		303	78516	0.3449	0.653096	1.53117	1.068	3	Microtubule-associated protein tau OS=Rattus norvegicus GN=Mapt PE=1 SV=3
TFAM_RAT	447		145	28169	0.3431	0.649688	1.5392	1.198	2	Transcription factor A, mitochondrial OS=Rattus norvegicus GN=Tfam PE=2 SV=1
SV2A_RAT	143		566	82608	0.3376	0.639273	1.56428	1.316	4	Synaptic vesicle glycoprotein 2A OS=Rattus norvegicus GN=Sv2a PE=1 SV=2
ARGL1_RAT	481		122	32868	0.336	0.636243	1.57173	2.15	2	Arginine and glutamate-rich protein 1 OS=Rattus norvegicus GN=Arglu1 PE=1 SV=1
4F2_RAT	109		683	58036	0.333	0.630562	1.58589	1.007	2	4F2 cell-surface antigen heavy chain OS=Rattus norvegicus GN=Slc3a2 PE=1 SV=1
S6A11_RAT	336		215	69900	0.33	0.624882	1.6003	1.216	3	Sodium- and chloride-dependent GABA transporter 3 OS=Rattus norvegicus GN=Slc6a11 PE=1 SV=1
RL23A_RAT	136		578	17684	0.3253	0.615982	1.62342	1.223	3	60S ribosomal protein L23a OS=Rattus norvegicus GN=Rpl23a PE=2 SV=1
NDUAA_RAT	460		139	40468	0.3226	0.610869	1.63701	1.092	2	NADH dehydrogenase [ubiquinone] 1 alpha subcomplex subunit 10, mitochondrial OS=Rattus norvegicus GN=Ndufa10 PE=1 SV=1
CEND_RAT	409		161	15034	0.3218	0.609354	1.64108	1.079	2	Cell cycle exit and neuronal differentiation protein 1 OS=Rattus norvegicus GN=Cend1 PE=1 SV=1
TBA1A_RAT	20	1	2281	50104	0.3163	0.59894	1.66962	1.271	6	Tubulin alpha-1A chain OS=Rattus norvegicus GN=Tuba1a PE=1 SV=1
NDUS1_RAT	142		568	79362	0.3139	0.594395	1.68238	1.135	7	NADH-ubiquinone oxidoreductase 75 kDa subunit, mitochondrial OS=Rattus norvegicus GN=Ndufs1 PE=1 SV=1
TECR_RAT	328		221	36099	0.3133	0.593259	1.6856	1.487	5	Very-long-chain enoyl-CoA reductase OS=Rattus norvegicus GN=Tecr PE=1 SV=1
ACTG_RAT	40	1	1556	41766	0.3104	0.587767	1.70135	1.139	16	Actin, cytoplasmic 2 OS=Rattus norvegicus GN=Actg1 PE=1 SV=1
ACTB_RAT	40	2	1550	41710	0.3094	0.585874	1.70685	1.13	15	Actin, cytoplasmic 1 OS=Rattus norvegicus GN=Actb PE=1 SV=1
HCD2_RAT	111		670	27229	0.308	0.583223	1.71461	1.129	8	3-hydroxyacyl-CoA dehydrogenase type-2 OS=Rattus norvegicus GN=Hsd17b10 PE=1 SV=3
SDHA_RAT	149		523	71570	0.3072	0.581708	1.71908	1.068	11	Succinate dehydrogenase [ubiquinone] flavoprotein subunit, mitochondrial OS=Rattus norvegicus GN=Sdha PE=1 SV=1
CDK5_RAT	231		350	33233	0.3042	0.576027	1.73603	1.163	5	Cyclin-dependent-like kinase 5 OS=Rattus norvegicus GN=Cdk5 PE=1 SV=1
MRCKA_RAT	116	1	648	196940	0.2958	0.560121	1.78533	1.331	3	Serine/threonine-protein kinase MRCK alpha OS=Rattus norvegicus GN=Cdc42bpa PE=1 SV=1
DCLK2_RAT	23	1	2078	83964	0.2933	0.555387	1.80055	1.073	22	Serine/threonine-protein kinase DCLK2 OS=Rattus norvegicus GN=Dclk2 PE=1 SV=2
PFKAM_RAT	26	2	1120	85506	0.2921	0.553115	1.80794	1.073	17	ATP-dependent 6-phosphofructokinase, muscle type OS=Rattus norvegicus GN=Pfkm PE=1 SV=3
EF1A2_RAT	118	1	632	50422	0.2912	0.551411	1.81353	1.347	2	Elongation factor 1-alpha 2 OS=Rattus norvegicus GN=Eef1a2 PE=1 SV=1
MOES_RAT	394		172	67697	0.2896	0.548381	1.82355	1.194	3	Moesin OS=Rattus norvegicus GN=Msn PE=1 SV=3
CHK1_RAT	38	3	36	54394	0.2873	0.544026	1.83815	1.026	2	Serine/threonine-protein kinase Chk1 OS=Rattus norvegicus GN=Chek1 PE=2 SV=1
SYN2_RAT	108	2	663	63417	0.2842	0.538156	1.8582	1.321	3	Synapsin-2 OS=Rattus norvegicus GN=Syn2 PE=1 SV=1
NECA1_RAT	343		206	40878	0.2818	0.533611	1.87402	1.216	2	N-terminal EF-hand calcium-binding protein 1 OS=Rattus norvegicus GN=Necab1 PE=1 SV=1
SRCN1_RAT	5		5420	129665	0.2817	0.533422	1.87469	1.07	47	SRC kinase signaling inhibitor 1 OS=Rattus norvegicus GN=Srcin1 PE=1 SV=1
LOX15_RAT	534		103	75329	0.2805	0.531149	1.88271	1.006	2	Arachidonate 15-lipoxygenase OS=Rattus norvegicus GN=Alox15 PE=1 SV=3
NDRG2_RAT	282		277	40753	0.2765	0.523575	1.90995	1.203	3	Protein NDRG2 OS=Rattus norvegicus GN=Ndrg2 PE=1 SV=1
DCLK1_RAT	23	2	1776	47651	0.2758	0.52225	1.91479	1.145	18	Serine/threonine-protein kinase DCLK1 OS=Rattus norvegicus GN=Dclk1 PE=1 SV=1
IDH3B_RAT	68		1053	42327	0.2722	0.515433	1.94012	1.171	15	Isocitrate dehydrogenase [NAD] subunit beta, mitochondrial OS=Rattus norvegicus GN=Idh3B PE=2 SV=1
KAPCB_RAT	383	2	111	40682	0.2664	0.50445	1.98236	1.13	2	cAMP-dependent protein kinase catalytic subunit beta OS=Rattus norvegicus GN=Prkacb PE=1 SV=2
GNAI1_RAT	93	2	536	40319	0.2663	0.504261	1.9831	1.341	5	Guanine nucleotide-binding protein G(i) subunit alpha-1 OS=Rattus norvegicus GN=Gnai1 PE=1 SV=3
GNAI2_RAT	93	3	367	40473	0.2663	0.504261	1.9831	1.419	4	Guanine nucleotide-binding protein G(i) subunit alpha-2 OS=Rattus norvegicus GN=Gnai2 PE=1 SV=3
LONP2_RAT	175		463	94334	0.2643	0.500473	1.99811	1.24	4	Lon protease homolog 2, peroxisomal OS=Rattus norvegicus GN=Lonp2 PE=1 SV=2
1433B_RAT	120	6	262	28037	0.2571	0.48684	2.05406	2.513	6	14-3-3 protein beta/alpha OS=Rattus norvegicus GN=Ywhab PE=1 SV=3
DCX_RAT	23	3	237	40534	0.2554	0.483621	2.06774	1.445	2	Neuronal migration protein doublecortin OS=Rattus norvegicus GN=Dcx PE=1 SV=2
INP4A_RAT	58		1165	105522	0.2549	0.482674	2.07179	1.042	4	Type I inositol 3,4-bisphosphate 4-phosphatase OS=Rattus norvegicus GN=Inpp4a PE=1 SV=1
HBS1L_RAT	213		385	74727	0.2541	0.481159	2.07832	2.589	3	HBS1-like protein OS=Rattus norvegicus GN=Hbs1l PE=1 SV=1
GNAI3_RAT	93	4	315	40496	0.2515	0.476236	2.0998	1.529	3	Guanine nucleotide-binding protein G(k) subunit alpha OS=Rattus norvegicus GN=Gnai3 PE=1 SV=3
BRSK2_RAT	38	2	434	81403	0.2503	0.473963	2.10987	1.158	8	Serine/threonine-protein kinase BRSK2 OS=Rattus norvegicus GN=Brsk2 PE=1 SV=1
BDH_RAT	307		242	38177	0.2495	0.472448	2.11663	1.204	3	D-beta-hydroxybutyrate dehydrogenase, mitochondrial OS=Rattus norvegicus GN=Bdh1 PE=1 SV=2
BRSK1_RAT	38	1	1573	85130	0.2493	0.47207	2.11833	1.109	23	Serine/threonine-protein kinase BRSK1 OS=Rattus norvegicus GN=Brsk1 PE=1 SV=1
VAPA_RAT	264	1	294	27823	0.2478	0.469229	2.13115	2.435	2	Vesicle-associated membrane protein-associated protein A OS=Rattus norvegicus GN=Vapa PE=1 SV=3
SYN1_RAT	108	1	686	73943	0.2477	0.46904	2.13201	1.095	5	Synapsin-1 OS=Rattus norvegicus GN=Syn1 PE=1 SV=3
ODPA_RAT	298		256	43199	0.2432	0.460519	2.17146	1.229	3	Pyruvate dehydrogenase E1 component subunit alpha, somatic form, mitochondrial OS=Rattus norvegicus GN=Pdha1 PE=1 SV=2
HSDL1_RAT	520		107	36884	0.241	0.456353	2.19129	1.071	2	Inactive hydroxysteroid dehydrogenase-like protein 1 OS=Rattus norvegicus GN=Hsdl1 PE=2 SV=1
UCRI_RAT	232		349	29427	0.2398	0.454081	2.20225	1.866	2	Cytochrome b-c1 complex subunit Rieske, mitochondrial OS=Rattus norvegicus GN=Uqcrfs1 PE=1 SV=2
G3PT_RAT	18	2	266	46678	0.2369	0.448589	2.22921	3.026	2	Glyceraldehyde-3-phosphate dehydrogenase, testis-specific OS=Rattus norvegicus GN=Gapdhs PE=1 SV=1
PP2BA_RAT	132	1	591	58606	0.2366	0.448021	2.23204	1.085	2	Serine/threonine-protein phosphatase 2B catalytic subunit alpha isoform OS=Rattus norvegicus GN=Ppp3ca PE=1 SV=1
RL29_RAT	451		143	17315	0.2264	0.428707	2.3326	9.203	2	60S ribosomal protein L29 OS=Rattus norvegicus GN=Rpl29 PE=1 SV=3
PP2BB_RAT	132	2	581	59076	0.2248	0.425677	2.3492	1.097	4	Serine/threonine-protein phosphatase 2B catalytic subunit beta isoform OS=Rattus norvegicus GN=Ppp3cb PE=1 SV=1
ATAD3_RAT	210		391	66718	0.2176	0.412043	2.42693	1.103	5	ATPase family AAA domain-containing protein 3 OS=Rattus norvegicus GN=Atad3 PE=1 SV=1
ARP2_RAT	397		167	44705	0.2123	0.402007	2.48752	1.41	2	Actin-related protein 2 OS=Rattus norvegicus GN=Actr2 PE=2 SV=1
C2D1A_RAT	79		902	103523	0.2119	0.40125	2.49221	1.121	12	Coiled-coil and C2 domain-containing protein 1A OS=Rattus norvegicus GN=Cc2d1a PE=1 SV=2
TBB5_RAT	12	3	2397	49639	0.21	0.397652	2.51476	1.188	5	Tubulin beta-5 chain OS=Rattus norvegicus GN=Tubb5 PE=1 SV=1
DLG3_RAT	1	3	427	93481	0.2041	0.38648	2.58746	12.93	2	Disks large homolog 3 OS=Rattus norvegicus GN=Dlg3 PE=1 SV=1
TBB2B_RAT	12	1	3295	49921	0.1909	0.361485	2.76637	1.19	6	Tubulin beta-2B chain OS=Rattus norvegicus GN=Tubb2b PE=1 SV=1
BACH_RAT	421		157	42708	0.1901	0.35997	2.77801	1.17	2	Cytosolic acyl coenzyme A thioester hydrolase OS=Rattus norvegicus GN=Acot7 PE=1 SV=4
RS3_RAT	21		2184	26657	0.1883	0.356561	2.80457	1.832	23	40S ribosomal protein S3 OS=Rattus norvegicus GN=Rps3 PE=1 SV=1
TBB3_RAT	12	4	2265	50386	0.1824	0.345389	2.89529	1.261	3	Tubulin beta-3 chain OS=Rattus norvegicus GN=Tubb3 PE=1 SV=1
TBB4B_RAT	12	2	2852	49769	0.1788	0.338572	2.95358	1.222	5	Tubulin beta-4B chain OS=Rattus norvegicus GN=Tubb4b PE=1 SV=1
GNA13_RAT	93	5	273	43984	0.1778	0.336679	2.97019	1.576	2	Guanine nucleotide-binding protein subunit alpha-13 OS=Rattus norvegicus GN=Gna13 PE=1 SV=1
ATPG_RAT	201		404	30172	0.1731	0.327779	3.05084	1.305	6	ATP synthase subunit gamma, mitochondrial OS=Rattus norvegicus GN=Atp5c1 PE=1 SV=2
AAPK1_RAT	151	1	520	63933	0.1676	0.317364	3.15095	1.17	5	5'-AMP-activated protein kinase catalytic subunit alpha-1 OS=Rattus norvegicus GN=Prkaa1 PE=1 SV=2
ACSL3_RAT	194	1	431	80406	0.1606	0.304109	3.28829	1.28	3	Long-chain-fatty-acid--CoA ligase 3 OS=Rattus norvegicus GN=Acsl3 PE=1 SV=1
LYSM1_RAT	278		282	24863	0.1537	0.291043	3.43591	1.309	6	LysM and putative peptidoglycan-binding domain-containing protein 1 OS=Rattus norvegicus GN=Lysmd1 PE=1 SV=1
ODPB_RAT	260		295	38957	0.1432	0.271161	3.68785	1.186	2	Pyruvate dehydrogenase E1 component subunit beta, mitochondrial OS=Rattus norvegicus GN=Pdhb PE=1 SV=2
MPCP_RAT	272		288	39419	0.1377	0.260746	3.83515	1.187	5	Phosphate carrier protein, mitochondrial OS=Rattus norvegicus GN=Slc25a3 PE=1 SV=1
GHC2_RAT	246		323	34148	0.1358	0.257148	3.88881	2.559	3	Mitochondrial glutamate carrier 2 OS=Rattus norvegicus GN=Slc25a18 PE=2 SV=2
G3P_RAT	18	1	2447	35805	0.1328	0.251468	3.97666	1.612	12	Glyceraldehyde-3-phosphate dehydrogenase OS=Rattus norvegicus GN=Gapdh PE=1 SV=3
DLG2_RAT	1	4	258	94875	0.126	0.238591	4.19127	1.584	2	Disks large homolog 2 OS=Rattus norvegicus GN=Dlg2 PE=1 SV=1
LGI1_RAT	276		284	63687	0.1173	0.222117	4.50213	1.066	2	Leucine-rich glioma-inactivated protein 1 OS=Rattus norvegicus GN=Lgi1 PE=1 SV=1
ADT1_RAT	8	2	3210	32968	0.1127	0.213407	4.68589	1.098	17	ADP/ATP translocase 1 OS=Rattus norvegicus GN=Slc25a4 PE=1 SV=3
SFXN5_RAT	189		440	37281	0.1094	0.207158	4.82724	1.238	5	Sideroflexin-5 OS=Rattus norvegicus GN=Sfxn5 PE=2 SV=1
ADT2_RAT	8	1	4319	32880	0.1084	0.205264	4.87177	1.146	22	ADP/ATP translocase 2 OS=Rattus norvegicus GN=Slc25a5 PE=1 SV=3
STXB1_RAT	164		484	67526	0.1053	0.199394	5.01519	1.823	2	Syntaxin-binding protein 1 OS=Rattus norvegicus GN=Stxbp1 PE=1 SV=1
SFXN3_RAT	105	1	695	35411	0.09778	0.185154	5.4009	1.203	10	Sideroflexin-3 OS=Rattus norvegicus GN=Sfxn3 PE=2 SV=1
RL26_RAT	362		193	17267	0.09758	0.184776	5.41197	4.365	2	60S ribosomal protein L26 OS=Rattus norvegicus GN=Rpl26 PE=1 SV=1
KHDR1_RAT	519		107	48285	0.09353	0.177107	5.64632	1.669	4	KH domain-containing, RNA-binding, signal transduction-associated protein 1 OS=Rattus norvegicus GN=Khdrbs1 PE=1 SV=1
TXTP_RAT	145		558	33814	0.08769	0.166048	6.02235	1.21	8	Tricarboxylate transport protein, mitochondrial OS=Rattus norvegicus GN=Slc25a1 PE=1 SV=1
SHAN1_RAT	176		461	226196	0.08214	0.155539	6.42927	2.573	2	SH3 and multiple ankyrin repeat domains protein 1 OS=Rattus norvegicus GN=Shank1 PE=1 SV=1
NHRF2_RAT	295		259	37346	0.0775	0.146753	6.81419	1.79	3	Na(+)/H(+) exchange regulatory cofactor NHE-RF2 OS=Rattus norvegicus GN=Slc9a3r2 PE=1 SV=1
ARM10_RAT	296		257	33401	0.06608	0.125128	7.99183	1.28	3	Armadillo repeat-containing protein 10 OS=Rattus norvegicus GN=Armc10 PE=1 SV=1
THIL_RAT	371		185	44666	0.06514	0.123348	8.10715	1.267	2	Acetyl-CoA acetyltransferase, mitochondrial OS=Rattus norvegicus GN=Acat1 PE=1 SV=1
M2OM_RAT	77		907	34222	0.06416	0.121492	8.23099	1.726	10	Mitochondrial 2-oxoglutarate/malate carrier protein OS=Rattus norvegicus GN=Slc25a11 PE=1 SV=3
S27A1_RAT	98		744	71238	0.06181	0.117042	8.54392	1.171	7	Long-chain fatty acid transport protein 1 OS=Rattus norvegicus GN=Slc27a1 PE=2 SV=1
DPYL5_RAT	35	3	259	61501	0.05786	0.109563	9.1272	5.13	3	Dihydropyrimidinase-related protein 5 OS=Rattus norvegicus GN=Dpysl5 PE=1 SV=1
SORT_RAT	339		212	91111	0.05315	0.100644	9.93603	1.136	2	Sortilin OS=Rattus norvegicus GN=Sort1 PE=1 SV=3
AAKB2_RAT	353	1	197	30208	0.05005	0.0947737	10.5514	5.381	3	5'-AMP-activated protein kinase subunit beta-2 OS=Rattus norvegicus GN=Prkab2 PE=1 SV=1
PISD_RAT	211		389	45795	0.03902	0.0738875	13.5341	1.332	3	Phosphatidylserine decarboxylase proenzyme, mitochondrial OS=Rattus norvegicus GN=Pisd PE=1 SV=3
GBB5_RAT	222		372	38707	0.2778	0.526037	1.90101	1.2938	2	Guanine nucleotide-binding protein subunit beta-5 OS=Rattus norvegicus GN=Gnb5 PE=2 SV=1
YMEL1_RAT	156	1	512	79817	0.01748	0.0330998	30.2117	4.305	2	ATP-dependent zinc metalloprotease YME1L1 OS=Rattus norvegicus GN=Yme1l1 PE=2 SV=1

## Sheet: Combined
					0.8181		Anzahl:	395
Accession	Mass	Hit numer	Member	Score	Heavy/Light Ratio	L/H	H/L Ratio Norm.	L/H Ratio Norm.	Standard deviation	pep count #	Accession	Hit numer	Member	Score	Mass	Heavy/Light Ratio	L/H	H/L Ratio Norm.	L/H Ratio Norm.	Standard deviation	pep count #	Accession	Hit numer	Member	Score	Mass	Heavy/Light Ratio	L/H	H/L Ratio Norm.	L/H Ratio Norm.	Standard deviation	pep count #	Description	Average pep count
DLG4_RAT	80416	1	1	33129	2.194	0.455789	2.68182	0.372881	1.456	44	DLG4_RAT	1	1	25449	80416	0.7484	1.33618	1.11485	0.89698	1.338	43	DLG4_RAT	1	1	27581	80416	0.782	1.27877	1.48078	0.67532	1.248	51	Disks large homolog 4 OS=Rattus norvegicus GN=Dlg4 PE=1 SV=1	46
MAP1A_RAT	299348	2	1	19345	1.169	0.855432	1.42892	0.699829	1.072	131	MAP1A_RAT	2	1	15391	299348	0.9706	1.03029	1.44585	0.691634	1.05	129	MAP1A_RAT	2	1	17184	299348	1.033	0.968054	1.95607	0.511229	1.055	145	Microtubule-associated protein 1A OS=Rattus norvegicus GN=Map1a PE=1 SV=1	135
GSTM5_RAT	26611	5	1	5477	0.9568	1.04515	1.16954	0.855038	1.102	18	GSTM5_RAT	3	1	6309	26611	0.774	1.29199	1.15299	0.867313	1.215	19	GSTM5_RAT	4	3	5280	26611	0.4741	2.10926	0.897747	1.1139	1.302	22	Glutathione S-transferase Mu 5 OS=Rattus norvegicus GN=Gstm5 PE=1 SV=3	19.6667
MTAP2_RAT	202288	6		5341	0.7191	1.39063	0.878988	1.13767	1.049	39	MTAP2_RAT	5	0	5491	202288	0.5774	1.7319	0.860122	1.16263	1.044	38	MTAP2_RAT	6	1	5324	202288	0.5627	1.77715	1.06552	0.938511	1.05	39	Microtubule-associated protein 2 OS=Rattus norvegicus GN=Map2 PE=1 SV=3	38.6667
MAP6_RAT	100423	7		4975	0.7266	1.37627	0.888155	1.12593	1.044	39	MAP6_RAT	8	0	4252	100423	0.6364	1.57134	0.948011	1.05484	1.048	43	MAP6_RAT	9	0	4308	100423	0.5579	1.79244	1.05643	0.946585	1.048	44	Microtubule-associated protein 6 OS=Rattus norvegicus GN=Map6 PE=1 SV=1	42
SRCN1_RAT	129665	8		4872	0.4596	2.17581	0.56179	1.78003	1.04	46	SRCN1_RAT	10	0	3803	129665	0.4367	2.2899	0.650529	1.53721	1.069	38	SRCN1_RAT	5	0	5420	129665	0.2817	3.54988	0.533422	1.87469	1.07	47	SRC kinase signaling inhibitor 1 OS=Rattus norvegicus GN=Srcin1 PE=1 SV=1	43.6667
GSTM4_RAT	25664	5	2	4837	1.023	0.977517	1.25046	0.799707	1.073	23	GSTM4_RAT	3	3	5876	25664	0.8508	1.17536	1.26739	0.789022	1.077	29	GSTM4_RAT	4	2	5601	25664	0.5028	1.98886	0.952092	1.05032	1.112	24	Glutathione S-transferase Yb-3 OS=Rattus norvegicus GN=Gstm3 PE=1 SV=2	25.3333
GSTM1_RAT	25897	5	3	4765	1.089	0.918274	1.33113	0.75124	1.125	22	GSTM1_RAT	3	2	6155	25897	0.8814	1.13456	1.31297	0.761629	1.084	23	GSTM1_RAT	4	1	6375	25897	0.4907	2.03791	0.92918	1.07622	1.183	26	Glutathione S-transferase Mu 1 OS=Rattus norvegicus GN=Gstm1 PE=1 SV=2	23.6667
ADT2_RAT	32880	9	1	4494	0.2478	4.03551	0.302897	3.30145	1.077	21	ADT2_RAT	9	1	3926	32880	0.1897	5.27148	0.282586	3.53875	1.122	20	ADT2_RAT	8	1	4319	32880	0.1084	9.22509	0.205264	4.87177	1.146	22	ADP/ATP translocase 2 OS=Rattus norvegicus GN=Slc25a5 PE=1 SV=3	21
ADT1_RAT	32968	9	2	4287	0.2551	3.92003	0.31182	3.20698	1.072	18	ADT1_RAT	9	2	3431	32968	0.1971	5.07357	0.293609	3.40589	1.123	18	ADT1_RAT	8	2	3210	32968	0.1127	8.87311	0.213407	4.68589	1.098	17	ADP/ATP translocase 1 OS=Rattus norvegicus GN=Slc25a4 PE=1 SV=3	17.6667
AT1A3_RAT	111620	10	1	3839	0.7153	1.39801	0.874343	1.14372	1.064	31	AT1A3_RAT	11	1	3412	111620	0.6822	1.46585	1.01624	0.984022	1.061	27	AT1A3_RAT	10	1	3871	111620	0.4979	2.00844	0.942814	1.06065	1.077	26	Sodium/potassium-transporting ATPase subunit alpha-3 OS=Rattus norvegicus GN=Atp1a3 PE=1 SV=2	28
MAP1B_RAT	269334	2	2	3618	1.028	0.972763	1.25657	0.795817	1.062	39	MAP1B_RAT	2	2	3978	269334	0.8415	1.18835	1.25354	0.797742	1.038	38	MAP1B_RAT	2	2	4732	269334	0.6297	1.58806	1.19239	0.838653	1.104	45	Microtubule-associated protein 1B OS=Rattus norvegicus GN=Map1b PE=1 SV=2	40.6667
GSTP1_RAT	23424	11	1	3558	0.7771	1.28684	0.949884	1.05276	1.141	10	GSTP1_RAT	6	0	5001	23424	0.6193	1.61473	0.922538	1.08397	1.109	13	GSTP1_RAT	3	1	6528	23424	0.3705	2.69906	0.701572	1.42537	1.235	11	Glutathione S-transferase P OS=Rattus norvegicus GN=Gstp1 PE=1 SV=2	11.3333
AT1A2_RAT	112145	10	2	3397	0.7188	1.39121	0.878621	1.13815	1.07	28	AT1A2_RAT	11	2	3055	112145	0.6971	1.43451	1.03843	0.96299	1.07	24	AT1A2_RAT	10	2	3402	112145	0.5013	1.99481	0.949252	1.05346	1.096	24	Sodium/potassium-transporting ATPase subunit alpha-2 OS=Rattus norvegicus GN=Atp1a2 PE=1 SV=1	25.3333
SPTN1_RAT	284462	12		3396	1.148	0.87108	1.40325	0.712631	1.025	41	SPTN1_RAT	12	1	2903	284462	0.8473	1.18022	1.26218	0.792281	1.026	38	SPTN1_RAT	13	0	2997	284462	0.8156	1.22609	1.5444	0.647499	1.034	35	Spectrin alpha chain, non-erythrocytic 1 OS=Rattus norvegicus GN=Sptan1 PE=1 SV=2	38
AT1A1_RAT	112982	10	3	3265	0.7195	1.38985	0.879477	1.13704	1.078	20	AT1A1_RAT	11	3	2890	112982	0.6977	1.43328	1.03933	0.962161	1.086	22	AT1A1_RAT	10	3	3145	112982	0.4829	2.07082	0.91441	1.0936	1.095	22	Sodium/potassium-transporting ATPase subunit alpha-1 OS=Rattus norvegicus GN=Atp1a1 PE=1 SV=1	21.3333
GSTM2_RAT	25686	5	4	2750	1.008	0.992063	1.23212	0.811607	1.076	19	GSTM2_RAT	3	4	2902	25686	0.8534	1.17178	1.27126	0.786618	1.134	25	GSTM2_RAT	4	4	3174	25686	0.5042	1.98334	0.954743	1.0474	1.148	22	Glutathione S-transferase Mu 2 OS=Rattus norvegicus GN=Gstm2 PE=1 SV=2	22
CLAP2_RAT	140551	13		2736	1.09	0.917431	1.33236	0.75055	1.023	31	CLAP2_RAT	21	0	1771	140551	0.7378	1.35538	1.09906	0.909867	1.148	25	CLAP2_RAT	14	0	2690	140551	0.6131	1.63106	1.16095	0.86136	1.192	28	CLIP-associating protein 2 OS=Rattus norvegicus GN=Clasp2 PE=1 SV=1	28
TBB2B_RAT	49921	14	1	2600	0.4961	2.01572	0.606405	1.64906	1.117	8	TBB2B_RAT	15	1	2348	49921	0.3082	3.24465	0.459109	2.17813	1.275	6	TBB2B_RAT	12	1	3295	49921	0.1909	5.23834	0.361485	2.76637	1.19	6	Tubulin beta-2B chain OS=Rattus norvegicus GN=Tubb2b PE=1 SV=1	6.66667
TBB2A_RAT	49875	14	2	2577	0.4961	2.01572	0.606405	1.64906	1.117	8	#N/A	#N/A	#N/A	#N/A	#N/A	#N/A	#N/A	#N/A	#N/A	#N/A	#N/A	#N/A	#N/A	#N/A	#N/A	#N/A	#N/A	#N/A	#N/A	#N/A	#N/A	#N/A	Tubulin beta-2A chain OS=Rattus norvegicus GN=Tubb2a PE=1 SV=1	#N/A
HSP7C_RAT	70827	15	1	2541	1.088	0.919118	1.32991	0.75193	1.031	20	HSP7C_RAT	23	1	1684	70827	0.8852	1.12969	1.31864	0.75836	1.53	24	HSP7C_RAT	16	1	2496	70827	0.8282	1.20744	1.56826	0.637648	1.048	28	Heat shock cognate 71 kDa protein OS=Rattus norvegicus GN=Hspa8 PE=1 SV=1	24
CLH1_RAT	191477	16		2455	1.202	0.831947	1.46926	0.680616	1.029	38	CLH1_RAT	27	0	1513	191477	1.121	0.892061	1.66989	0.59884	1.044	34	CLH1_RAT	22	0	2156	191477	0.9175	1.08992	1.73736	0.575586	1.032	28	Clathrin heavy chain 1 OS=Rattus norvegicus GN=Cltc PE=1 SV=3	33.3333
MBP_RAT	21489	17		2411	0.6326	1.58078	0.773255	1.29323	1.416	12	MBP_RAT	14	0	2379	21489	0.4471	2.23664	0.666021	1.50145	1.329	12	MBP_RAT	19	0	2369	21489	0.3543	2.82247	0.670896	1.49054	1.432	12	Myelin basic protein OS=Rattus norvegicus GN=Mbp PE=1 SV=3	12
TBB4B_RAT	49769	14	3	2336	0.4985	2.00602	0.609339	1.64112	1.133	5	TBB4B_RAT	15	2	2098	49769	0.3223	3.1027	0.480113	2.08284	1.16	3	TBB4B_RAT	12	2	2852	49769	0.1788	5.59284	0.338572	2.95358	1.222	5	Tubulin beta-4B chain OS=Rattus norvegicus GN=Tubb4b PE=1 SV=1	4.33333
G3P_RAT	35805	18	1	2261	0.306	3.26797	0.374037	2.67353	1.395	14	G3P_RAT	17	0	1956	35805	0.2058	4.85909	0.306569	3.2619	2.162	12	G3P_RAT	18	1	2447	35805	0.1328	7.53012	0.251468	3.97666	1.612	12	Glyceraldehyde-3-phosphate dehydrogenase OS=Rattus norvegicus GN=Gapdh PE=1 SV=3	12.6667
TBA1A_RAT	50104	19	1	2099	0.6251	1.59974	0.764088	1.30875	1.184	6	TBA1A_RAT	13	1	2382	50104	0.4121	2.4266	0.613884	1.62897	1.159	5	TBA1A_RAT	20	1	2281	50104	0.3163	3.16156	0.59894	1.66962	1.271	6	Tubulin alpha-1A chain OS=Rattus norvegicus GN=Tuba1a PE=1 SV=1	5.66667
MARK2_RAT	80821	20	1	1915	0.7941	1.25929	0.970664	1.03022	1.091	17	MARK2_RAT	24	1	1668	80821	0.5992	1.66889	0.892596	1.12033	1.135	18	MARK2_RAT	32	1	1783	80821	0.5425	1.84332	1.02727	0.973456	1.372	23	Serine/threonine-protein kinase MARK2 OS=Rattus norvegicus GN=Mark2 PE=1 SV=1	19.3333
PABP1_RAT	70656	21		1897	1.18	0.847458	1.44237	0.693305	1.034	29	PABP1_RAT	20	0	1781	70656	1.042	0.959693	1.55221	0.644242	1.09	26	PABP1_RAT	27	0	1856	70656	0.8951	1.11719	1.69494	0.58999	1.031	31	Polyadenylate-binding protein 1 OS=Rattus norvegicus GN=Pabpc1 PE=1 SV=1	28.6667
ARHG2_RAT	111840	22		1896	1.181	0.84674	1.44359	0.692718	1.139	31	ARHG2_RAT	38	0	1319	111840	1.029	0.971817	1.53285	0.652381	1.037	24	ARHG2_RAT	45	0	1392	111840	0.6925	1.44404	1.3113	0.762599	1.051	24	Rho guanine nucleotide exchange factor 2 OS=Rattus norvegicus GN=Arhgef2 PE=1 SV=1	26.3333
TBB5_RAT	49639	14	4	1892	0.5165	1.93611	0.631341	1.58393	1.137	5	TBB5_RAT	15	3	1790	49639	0.3622	2.76091	0.53955	1.8534	1.345	3	TBB5_RAT	12	3	2397	49639	0.21	4.7619	0.397652	2.51476	1.188	5	Tubulin beta-5 chain OS=Rattus norvegicus GN=Tubb5 PE=1 SV=1	4.33333
BRSK1_RAT	85130	23	1	1889	0.332	3.01205	0.405818	2.46416	1.08	22	BRSK1_RAT	34	1	1418	85130	0.2873	3.48068	0.427976	2.33658	1.072	23	BRSK1_RAT	38	1	1573	85130	0.2493	4.01123	0.47207	2.11833	1.109	23	Serine/threonine-protein kinase BRSK1 OS=Rattus norvegicus GN=Brsk1 PE=1 SV=1	22.6667
DCLK2_RAT	83964	24	1	1872	0.3685	2.7137	0.450434	2.22008	1.067	21	DCLK2_RAT	16	1	2092	83964	0.2549	3.92311	0.379711	2.63358	1.106	19	DCLK2_RAT	23	1	2078	83964	0.2933	3.40948	0.555387	1.80055	1.073	22	Serine/threonine-protein kinase DCLK2 OS=Rattus norvegicus GN=Dclk2 PE=1 SV=2	20.6667
TBB3_RAT	50386	14	5	1868	0.5563	1.79759	0.67999	1.47061	1.138	5	TBB3_RAT	15	4	1662	50386	0.4179	2.39292	0.622523	1.60637	1.447	3	TBB3_RAT	12	4	2265	50386	0.1824	5.48246	0.345389	2.89529	1.261	3	Tubulin beta-3 chain OS=Rattus norvegicus GN=Tubb3 PE=1 SV=1	3.66667
RSSA_RAT	32803	25		1807	1.044	0.957854	1.27613	0.783621	1.069	14	RSSA_RAT	18	0	1945	32803	0.8417	1.18807	1.25384	0.797553	1.13	15	RSSA_RAT	17	0	2462	32803	0.6094	1.64096	1.15395	0.86659	1.184	15	40S ribosomal protein SA OS=Rattus norvegicus GN=Rpsa PE=1 SV=3	14.6667
PFKAP_RAT	85665	26	1	1776	0.5371	1.86185	0.656521	1.52318	1.065	21	PFKAP_RAT	26	1	1562	85665	0.3886	2.57334	0.578877	1.72748	1.058	24	PFKAP_RAT	26	1	1888	85665	0.4127	2.42307	0.781481	1.27962	1.045	24	ATP-dependent 6-phosphofructokinase, platelet type OS=Rattus norvegicus GN=Pfkp PE=1 SV=2	23
LANC1_RAT	45210	27		1744	0.6893	1.45075	0.842562	1.18686	1.161	13	LANC1_RAT	19	0	1926	45210	0.6898	1.4497	1.02756	0.973181	1.08	17	LANC1_RAT	15	0	2625	45210	0.6085	1.64339	1.15224	0.867872	1.263	18	LanC-like protein 1 OS=Rattus norvegicus GN=Lancl1 PE=1 SV=2	16
DHX30_RAT	133913	28		1684	1.176	0.85034	1.43748	0.695663	1.058	25	DHX30_RAT	48	0	1115	133913	1.01	0.990099	1.50454	0.664653	1.052	28	DHX30_RAT	41	0	1551	133913	0.6392	1.56446	1.21038	0.826189	1.04	29	Putative ATP-dependent RNA helicase DHX30 OS=Rattus norvegicus GN=Dhx30 PE=1 SV=1	27.3333
HS105_RAT	96357	29	1	1675	2.034	0.491642	2.48625	0.402212	1.662	12	HS105_RAT	74	1	812	96357	0.6427	1.55594	0.957396	1.0445	1.268	9	HS105_RAT	67	1	1053	96357	0.5541	1.80473	1.04923	0.953077	1.373	10	Heat shock protein 105 kDa OS=Rattus norvegicus GN=Hsph1 PE=1 SV=1	10.3333
DPYL2_RAT	62239	30	1	1649	0.3586	2.78862	0.438333	2.28137	1.278	17	DPYL2_RAT	22	1	1740	62239	0.322	3.10559	0.479666	2.08478	1.17	12	DPYL2_RAT	35	1	1651	62239	0.4104	2.43665	0.777126	1.28679	1.194	15	Dihydropyrimidinase-related protein 2 OS=Rattus norvegicus GN=Dpysl2 PE=1 SV=1	14.6667
RS3_RAT	26657	31		1580	1.171	0.853971	1.43137	0.698634	1.116	18	RS3_RAT	28	0	1490	26657	0.9409	1.06281	1.40161	0.713466	1.101	19	RS3_RAT	21	0	2184	26657	0.1883	5.31067	0.356561	2.80457	1.832	23	40S ribosomal protein S3 OS=Rattus norvegicus GN=Rps3 PE=1 SV=1	20
MAP4_RAT	110233	32		1566	0.6516	1.53468	0.79648	1.25552	1.094	11	MAP4_RAT	42	0	1235	110233	0.5682	1.75994	0.846417	1.18145	1.087	11	MAP4_RAT	36	0	1644	110233	0.4231	2.36351	0.801174	1.24817	1.105	11	Microtubule-associated protein 4 OS=Rattus norvegicus GN=Map4 PE=1 SV=1	11
NSF_RAT	82600	33		1562	0.7389	1.35336	0.90319	1.10719	1.04	27	NSF_RAT	31	0	1464	82600	0.5207	1.92049	0.775659	1.28923	1.048	34	NSF_RAT	46	0	1389	82600	0.5299	1.88715	1.00341	0.996603	1.053	28	Vesicle-fusing ATPase OS=Rattus norvegicus GN=Nsf PE=1 SV=1	29.6667
DDX1_RAT	82445	34		1547	0.9232	1.08319	1.12847	0.886157	1.055	20	DDX1_RAT	43	0	1228	82445	0.532	1.8797	0.792492	1.26184	1.059	20	DDX1_RAT	33	0	1712	82445	0.4006	2.49626	0.758568	1.31827	1.043	19	ATP-dependent RNA helicase DDX1 OS=Rattus norvegicus GN=Ddx1 PE=1 SV=1	19.6667
BSN_RAT	418168	35		1474	1.118	0.894454	1.36658	0.731753	1.117	10	BSN_RAT	29	1	1488	418168	1.362	0.734214	2.0289	0.492878	1.198	11	BSN_RAT	62	0	1100	418168	0.6773	1.47645	1.28252	0.779714	1.146	5	Protein bassoon OS=Rattus norvegicus GN=Bsn PE=1 SV=3	8.66667
MYO5A_RAT	211630	36		1473	1.009	0.99108	1.23335	0.810803	1.05	12	MYO5A_RAT	41	0	1244	211630	0.808	1.23762	1.20363	0.830817	1.055	15	MYO5A_RAT	55	0	1227	211630	0.7876	1.26968	1.49138	0.670518	1.06	15	Unconventional myosin-Va OS=Rattus norvegicus GN=Myo5a PE=1 SV=1	14
RL5_RAT	34437	37		1466	0.9571	1.04482	1.16991	0.85477	1.162	14	RL5_RAT	33	0	1429	34437	0.8309	1.20351	1.23775	0.807919	1.133	13	RL5_RAT	29	0	1833	34437	0.9503	1.0523	1.79947	0.555719	1.224	20	60S ribosomal protein L5 OS=Rattus norvegicus GN=Rpl5 PE=1 SV=3	15.6667
CALD1_RAT	60548	39		1445	0.9123	1.09613	1.11514	0.896744	1.091	17	CALD1_RAT	60	0	926	60548	0.6496	1.53941	0.967675	1.03341	1.042	13	CALD1_RAT	76	0	919	60548	0.6275	1.59363	1.18822	0.841594	1.123	8	Non-muscle caldesmon OS=Rattus norvegicus GN=Cald1 PE=1 SV=1	12.6667
DCLK1_RAT	47651	24	2	1441	0.4278	2.33754	0.522919	1.91234	1.059	13	DCLK1_RAT	16	2	1296	47651	0.2837	3.52485	0.422613	2.36623	1.196	16	DCLK1_RAT	23	2	1776	47651	0.2758	3.62582	0.52225	1.91479	1.145	18	Serine/threonine-protein kinase DCLK1 OS=Rattus norvegicus GN=Dclk1 PE=1 SV=1	15.6667
RL6_RAT	33541	40		1438	1.07	0.934579	1.30791	0.764579	1.13	12	RL6_RAT	47	0	1159	33541	0.8467	1.18106	1.26128	0.792843	1.057	14	RL6_RAT	28	0	1855	33541	0.609	1.64204	1.15319	0.867159	1.144	20	60S ribosomal protein L6 OS=Rattus norvegicus GN=Rpl6 PE=1 SV=5	15.3333
GRP78_RAT	72302	15	2	1421	0.9258	1.08015	1.13165	0.883668	1.072	17	GRP78_RAT	23	2	1316	72302	0.7183	1.39218	1.07001	0.934568	1.094	19	GRP78_RAT	16	2	1833	72302	0.7958	1.2566	1.50691	0.663609	1.045	22	78 kDa glucose-regulated protein OS=Rattus norvegicus GN=Hspa5 PE=1 SV=1	19.3333
NUCL_RAT	77101	41		1395	1.177	0.849618	1.4387	0.695072	1.149	18	NUCL_RAT	75	0	810	77101	0.9985	1.0015	1.48741	0.672308	1.129	14	NUCL_RAT	39	0	1567	77101	0.6382	1.56691	1.20848	0.827484	1.088	21	Nucleolin OS=Rattus norvegicus GN=Ncl PE=1 SV=3	17.6667
RLA0_RAT	34194	42		1381	1.009	0.99108	1.23335	0.810803	1.255	12	RLA0_RAT	35	0	1381	34194	0.8276	1.20831	1.23283	0.811141	1.227	11	RLA0_RAT	30	0	1814	34194	0.7912	1.2639	1.4982	0.667467	1.427	18	60S acidic ribosomal protein P0 OS=Rattus norvegicus GN=Rplp0 PE=1 SV=2	13.6667
APC_RAT	310342	43		1326	0.7364	1.35796	0.900134	1.11095	1.129	9	APC_RAT	62	0	898	310342	0.5673	1.76274	0.845077	1.18332	1.089	9	APC_RAT	47	0	1355	310342	0.558	1.79211	1.05662	0.946416	1.095	7	Adenomatous polyposis coli protein OS=Rattus norvegicus GN=Apc PE=1 SV=1	8.33333
ACON_RAT	85380	44		1310	0.8971	1.1147	1.09657	0.911938	1.071	19	ACON_RAT	55	0	990	85380	0.5247	1.90585	0.781618	1.2794	1.241	18	ACON_RAT	44	0	1417	85380	0.4756	2.10261	0.900587	1.11039	1.039	18	Aconitate hydratase, mitochondrial OS=Rattus norvegicus GN=Aco2 PE=1 SV=2	18.3333
E41L1_RAT	98182	45		1304	1.376	0.726744	1.68195	0.594549	1.173	13	E41L1_RAT	51	0	1005	98182	0.9053	1.10461	1.34858	0.741522	1.049	10	E41L1_RAT	86	0	820	98182	0.8841	1.13109	1.67411	0.597331	1.051	7	Band 4.1-like protein 1 OS=Rattus norvegicus GN=Epb41l1 PE=1 SV=1	10
ACTG_RAT	41766	46	1	1287	0.3168	3.15657	0.387239	2.58239	1.086	10	ACTG_RAT	32	1	1451	41766	0.3114	3.2113	0.463876	2.15575	1.081	18	ACTG_RAT	40	1	1556	41766	0.3104	3.22165	0.587767	1.70135	1.139	16	Actin, cytoplasmic 2 OS=Rattus norvegicus GN=Actg1 PE=1 SV=1	14.6667
DPYL1_RAT	62157	30	2	1285	0.5137	1.94666	0.627918	1.59256	1.396	10	DPYL1_RAT	22	2	957	62157	0.4684	2.13493	0.697751	1.43318	1.27	8	DPYL1_RAT	35	2	912	62157	0.6292	1.58932	1.19144	0.83932	1.201	9	Dihydropyrimidinase-related protein 1 OS=Rattus norvegicus GN=Crmp1 PE=1 SV=1	9
CAPR1_RAT	78073	47		1273	1.085	0.921659	1.32624	0.754009	1.084	11	CAPR1_RAT	36	0	1355	78073	0.9352	1.06929	1.39312	0.717814	1.164	12	CAPR1_RAT	69	0	1001	78073	0.9069	1.10266	1.71729	0.582313	1.06	14	Caprin-1 OS=Rattus norvegicus GN=Caprin1 PE=1 SV=2	12.3333
RL18_RAT	21645	48		1261	1.283	0.779423	1.56827	0.637646	1.069	7	RL18_RAT	40	0	1244	21645	0.9292	1.07619	1.38418	0.722449	1.069	8	RL18_RAT	31	0	1811	21645	0.6166	1.6218	1.16758	0.856471	1.109	10	60S ribosomal protein L18 OS=Rattus norvegicus GN=Rpl18 PE=1 SV=2	8.33333
RP3A_RAT	75785	49		1254	0.6241	1.60231	0.762865	1.31085	1.065	17	RP3A_RAT	37	0	1345	75785	0.4812	2.07814	0.716818	1.39505	1.074	21	RP3A_RAT	57	0	1189	75785	0.4939	2.0247	0.93524	1.06924	1.098	20	Rabphilin-3A OS=Rattus norvegicus GN=Rph3a PE=1 SV=1	19.3333
AT2B1_RAT	138632	50	1	1248	0.765	1.30719	0.935094	1.06941	1.083	15	AT2B1_RAT	53	1	1004	138632	0.7189	1.39101	1.07091	0.933788	1.08	14	AT2B1_RAT	49	1	1305	138632	0.4944	2.02265	0.936186	1.06816	1.091	14	Plasma membrane calcium-transporting ATPase 1 OS=Rattus norvegicus GN=Atp2b1 PE=1 SV=2	14.3333
HSP72_RAT	69599	15	3	1217	1.033	0.968054	1.26268	0.791965	1.093	8	HSP72_RAT	23	3	658	69599	0.7952	1.25755	1.18457	0.84419	1.193	7	HSP72_RAT	16	3	993	69599	0.8496	1.17702	1.60879	0.621587	1.036	8	Heat shock-related 70 kDa protein 2 OS=Rattus norvegicus GN=Hspa2 PE=1 SV=2	7.66667
HNRPM_RAT	73733	51		1203	0.796	1.25628	0.972986	1.02776	1.096	12	HNRPM_RAT	45	0	1209	73733	0.5671	1.76336	0.844779	1.18374	1.069	8	HNRPM_RAT	43	0	1440	73733	0.5736	1.74338	1.08616	0.920676	1.047	13	Heterogeneous nuclear ribonucleoprotein M OS=Rattus norvegicus GN=Hnrnpm PE=1 SV=4	11
SND1_RAT	101888	52		1195	0.9322	1.07273	1.13947	0.877601	1.388	11	SND1_RAT	59	0	945	101888	0.8529	1.17247	1.27052	0.787079	1.073	10	SND1_RAT	90	0	797	101888	0.56	1.78571	1.06041	0.943036	1.088	6	Staphylococcal nuclease domain-containing protein 1 OS=Rattus norvegicus GN=Snd1 PE=1 SV=1	9
RACK1_RAT	35055	53		1142	0.9337	1.07101	1.1413	0.876191	1.165	17	RACK1_RAT	44	0	1223	35055	0.8208	1.21832	1.2227	0.817861	1.128	16	RACK1_RAT	51	0	1269	35055	0.9597	1.04199	1.81727	0.550276	1.467	13	Receptor of activated protein C kinase 1 OS=Rattus norvegicus GN=Rack1 PE=1 SV=3	15.3333
RL7A_RAT	29977	54		1132	1.197	0.835422	1.46315	0.683459	1.172	15	RL7A_RAT	82	0	755	29977	0.853	1.17233	1.27067	0.786987	1.073	14	RL7A_RAT	53	0	1252	29977	0.6212	1.60979	1.17629	0.850129	1.063	14	60S ribosomal protein L7a OS=Rattus norvegicus GN=Rpl7a PE=1 SV=2	14.3333
VIGLN_RAT	141496	55		1112	1.286	0.777605	1.57193	0.636159	1.05	12	VIGLN_RAT	101	0	654	141496	1.066	0.938086	1.58796	0.629737	1.067	13	VIGLN_RAT	56	0	1209	141496	0.9039	1.10632	1.71161	0.584246	1.027	20	Vigilin OS=Rattus norvegicus GN=Hdlbp PE=1 SV=1	15
PFKAM_RAT	85506	26	2	1107	0.408	2.45098	0.498717	2.00515	1.037	19	PFKAM_RAT	26	2	1245	85506	0.29	3.44828	0.431998	2.31483	1.052	19	PFKAM_RAT	26	2	1120	85506	0.2921	3.42349	0.553115	1.80794	1.073	17	ATP-dependent 6-phosphofructokinase, muscle type OS=Rattus norvegicus GN=Pfkm PE=1 SV=3	18.3333
TBA4A_RAT	49892	19	2	1105	0.5194	1.9253	0.634886	1.57509	1.193	4	TBA4A_RAT	13	2	969	49892	0.3899	2.56476	0.580813	1.72172	1.186	3	#N/A	#N/A	#N/A	#N/A	#N/A	#N/A	#N/A	#N/A	#N/A	#N/A	#N/A	Tubulin alpha-4A chain OS=Rattus norvegicus GN=Tuba4a PE=1 SV=1	#N/A
AT2B2_RAT	136724	50	2	1095	0.5854	1.70823	0.71556	1.39751	1.1	12	AT2B2_RAT	53	2	973	136724	0.598	1.67224	0.890809	1.12258	1.046	12	AT2B2_RAT	49	2	1269	136724	0.4135	2.41838	0.782996	1.27715	1.098	16	Plasma membrane calcium-transporting ATPase 2 OS=Rattus norvegicus GN=Atp2b2 PE=1 SV=2	13.3333
WDR7_RAT	163086	56		1082	0.7349	1.36073	0.898301	1.11321	1.045	14	WDR7_RAT	68	0	857	163086	0.6295	1.58856	0.937733	1.0664	1.074	15	WDR7_RAT	64	0	1089	163086	0.5994	1.66834	1.13501	0.881048	1.041	16	WD repeat-containing protein 7 OS=Rattus norvegicus GN=Wdr7 PE=1 SV=1	15
AGO2_RAT	97256	57		1075	1.182	0.846024	1.44481	0.692132	1.04	11	AGO2_RAT	91	0	687	97256	0.9722	1.02859	1.44823	0.690496	1.088	8	AGO2_RAT	101	0	736	97256	0.7965	1.25549	1.50824	0.663026	1.035	14	Protein argonaute-2 OS=Rattus norvegicus GN=Ago2 PE=2 SV=2	11
RL7_RAT	30310	58		1072	1.136	0.880282	1.38858	0.720158	1.089	17	RL7_RAT	69	0	852	30310	0.8647	1.15647	1.2881	0.776339	1.107	16	RL7_RAT	63	0	1095	30310	0.8318	1.20221	1.57508	0.634888	1.058	18	60S ribosomal protein L7 OS=Rattus norvegicus GN=Rpl7 PE=1 SV=2	17
RS6_RAT	28663	59		1071	1.499	0.667111	1.83229	0.545764	1.245	9	RS6_RAT	79	0	797	28663	0.9511	1.05141	1.4168	0.705814	1.093	9	RS6_RAT	54	0	1236	28663	0.7145	1.39958	1.35296	0.739118	1.063	14	40S ribosomal protein S6 OS=Rattus norvegicus GN=Rps6 PE=1 SV=1	10.6667
ANK3_RAT	284266	60		1068	1.022	0.978474	1.24924	0.800489	1.091	7	ANK3_RAT	39	0	1291	284266	0.9202	1.08672	1.37077	0.729515	1.326	5	ANK3_RAT	42	0	1526	284266	0.7545	1.32538	1.42871	0.699934	1.074	10	Ankyrin-3 OS=Rattus norvegicus GN=Ank3 PE=1 SV=3	7.33333
EAA2_RAT	62066	61		1040	0.4483	2.23065	0.547977	1.82489	1.138	8	EAA2_RAT	73	0	816	62066	0.363	2.75482	0.540742	1.84931	1.194	6	EAA2_RAT	48	0	1341	62066	0.3791	2.63783	0.717856	1.39304	1.229	5	Excitatory amino acid transporter 2 OS=Rattus norvegicus GN=Slc1a2 PE=1 SV=2	6.33333
UBP10_RAT	87257	62		1034	2.484	0.402576	3.0363	0.329348	1.913	12	UBP10_RAT	85	0	735	87257	0.9234	1.08295	1.37554	0.726987	1.371	11	UBP10_RAT	138	0	573	87257	0.988	1.01215	1.87086	0.534514	1.201	12	Ubiquitin carboxyl-terminal hydrolase 10 OS=Rattus norvegicus GN=Usp10 PE=1 SV=1	11.6667
AP2B1_RAT	104486	63	1	1024	0.9288	1.07666	1.13531	0.880814	2.202	7	AP2B1_RAT	152	1	454	104486	1.085	0.921659	1.61627	0.61871	1.178	4	AP2B1_RAT	171	1	466	104486	0.7419	1.34789	1.40485	0.711821	1.073	6	AP-2 complex subunit beta OS=Rattus norvegicus GN=Ap2b1 PE=1 SV=1	5.66667
MINK1_RAT	150289	64		1021	0.5543	1.80408	0.677546	1.47592	1.106	11	MINK1_RAT	78	0	798	150289	0.4743	2.10837	0.70654	1.41535	1.095	16	MINK1_RAT	61	0	1115	150289	0.3777	2.6476	0.715205	1.3982	1.095	15	Misshapen-like kinase 1 OS=Rattus norvegicus GN=Mink1 PE=1 SV=2	14
S12A5_RAT	126165	65		1018	0.4741	2.10926	0.579514	1.72559	1.053	11	S12A5_RAT	77	0	803	126165	0.571	1.75131	0.850588	1.17566	1.042	10	S12A5_RAT	72	0	959	126165	0.414	2.41546	0.783942	1.2756	1.03	10	Solute carrier family 12 member 5 OS=Rattus norvegicus GN=Slc12a5 PE=1 SV=2	10.3333
FARP1_RAT	118768	66		1016	1.009	0.99108	1.23335	0.810803	1.055	10	FARP1_RAT	106	0	630	118768	0.9497	1.05296	1.41472	0.706855	1.099	7	FARP1_RAT	146	0	550	118768	0.6313	1.58403	1.19542	0.836528	1.145	6	FERM, RhoGEF and pleckstrin domain-containing protein 1 OS=Rattus norvegicus GN=Farp1 PE=1 SV=2	7.66667
DLG1_RAT	100509	1	2	1007	2.678	0.373413	3.27344	0.305489	1.878	8	DLG1_RAT	1	2	641	100509	1.133	0.882613	1.68777	0.592498	2.518	7	DLG1_RAT	1	2	848	100509	7.733	0.129316	14.6431	0.0682917	2.178	7	Disks large homolog 1 OS=Rattus norvegicus GN=Dlg1 PE=1 SV=1	7.33333
SYNJ1_RAT	172773	67	1	1004	0.8991	1.11222	1.09901	0.90991	1.043	16	SYNJ1_RAT	92	0	685	172773	0.7405	1.35044	1.10308	0.90655	1.015	11	SYNJ1_RAT	73	0	947	172773	0.6374	1.56887	1.20697	0.828522	1.033	14	Synaptojanin-1 OS=Rattus norvegicus GN=Synj1 PE=1 SV=3	13.6667
MYH10_RAT	228824	68	1	998	1.052	0.95057	1.28591	0.777662	1.048	6	MYH10_RAT	49	1	1029	228824	0.7605	1.31492	1.13288	0.882709	1.118	9	MYH10_RAT	78	1	904	228824	0.8384	1.19275	1.58758	0.62989	1.1	7	Myosin-10 OS=Rattus norvegicus GN=Myh10 PE=1 SV=1	7.33333
IDH3B_RAT	42327	69		992	0.6078	1.64528	0.742941	1.346	1.073	14	IDH3B_RAT	56	0	987	42327	0.444	2.25225	0.661403	1.51194	1.126	15	IDH3B_RAT	68	0	1053	42327	0.2722	3.67377	0.515433	1.94012	1.171	15	Isocitrate dehydrogenase [NAD] subunit beta, mitochondrial OS=Rattus norvegicus GN=Idh3B PE=2 SV=1	14.6667
MARK3_RAT	88696	20	2	979	0.9814	1.01895	1.19961	0.833605	1.094	17	MARK3_RAT	24	2	870	88696	0.8084	1.23701	1.20423	0.830406	1.07	17	MARK3_RAT	32	2	990	88696	0.4276	2.33863	0.809695	1.23503	1.393	19	MAP/microtubule affinity-regulating kinase 3 OS=Rattus norvegicus GN=Mark3 PE=1 SV=1	17.6667
LUZP1_RAT	117105	70		971	1.485	0.673401	1.81518	0.550909	1.038	5	LUZP1_RAT	46	0	1200	117105	4.48	0.223214	6.67362	0.149844	1.25	6	LUZP1_RAT	25	0	1962	117105	2.742	0.364697	5.1922	0.192597	1.489	11	Leucine zipper protein 1 OS=Rattus norvegicus GN=Luzp1 PE=1 SV=1	7.33333
GRP75_RAT	73812	71		947	0.7272	1.37514	0.888889	1.125	1.052	17	GRP75_RAT	58	0	968	73812	0.6274	1.59388	0.934604	1.06997	1.062	16	GRP75_RAT	75	0	934	73812	0.6041	1.65536	1.14391	0.874193	1.031	20	Stress-70 protein, mitochondrial OS=Rattus norvegicus GN=Hspa9 PE=1 SV=3	17.6667
MARK1_RAT	88180	20	3	936	1.02	0.980392	1.24679	0.802059	1.051	16	MARK1_RAT	24	3	738	88180	0.8443	1.18441	1.25771	0.795097	1.052	12	MARK1_RAT	32	3	948	88180	0.4846	2.06356	0.917629	1.08976	1.38	18	Serine/threonine-protein kinase MARK1 OS=Rattus norvegicus GN=Mark1 PE=1 SV=1	15.3333
GSTA3_RAT	25303	72	1	927	1.201	0.832639	1.46804	0.681182	1.165	15	GSTA3_RAT	25	1	1612	25303	0.9422	1.06135	1.40355	0.712481	1.165	17	GSTA3_RAT	24	1	2011	25303	0.4752	2.10438	0.89983	1.11132	1.28	19	Glutathione S-transferase alpha-3 OS=Rattus norvegicus GN=Gsta3 PE=1 SV=3	17
RS4X_RAT	29579	73		912	1.114	0.897666	1.36169	0.734381	1.029	14	RS4X_RAT	90	0	698	29579	0.8553	1.16918	1.2741	0.784871	1.08	13	RS4X_RAT	34	0	1698	29579	0.4499	2.22272	0.851922	1.17382	1.347	22	40S ribosomal protein S4, X isoform OS=Rattus norvegicus GN=Rps4x PE=2 SV=2	16.3333
MIC60_RAT	67135	74	1	897	0.9366	1.06769	1.14485	0.873479	1.057	12	MIC60_RAT	57	0	982	67135	0.7824	1.27812	1.1655	0.858001	1.095	9	MIC60_RAT	81	1	867	67135	0.8237	1.21403	1.55974	0.641131	1.068	10	MICOS complex subunit Mic60 (Fragment) OS=Rattus norvegicus GN=Immt PE=1 SV=1	10.3333
C2D1A_RAT	103523	75	1	892	0.3084	3.24254	0.376971	2.65272	1.058	7	C2D1A_RAT	97	0	662	103523	0.3088	3.23834	0.460003	2.1739	1.167	11	C2D1A_RAT	79	0	902	103523	0.2119	4.71921	0.40125	2.49221	1.121	12	Coiled-coil and C2 domain-containing protein 1A OS=Rattus norvegicus GN=Cc2d1a PE=1 SV=2	10
INP4A_RAT	105522	76		885	0.1742	5.74053	0.212932	4.69633	1.416	4	INP4A_RAT	83	0	749	105522	0.4631	2.15936	0.689856	1.44958	1.399	4	INP4A_RAT	58	0	1165	105522	0.2549	3.92311	0.482674	2.07179	1.042	4	Type I inositol 3,4-bisphosphate 4-phosphatase OS=Rattus norvegicus GN=Inpp4a PE=1 SV=1	4
DLG3_RAT	93481	1	3	884	0.07795	12.8287	0.0952818	10.4952	2.94	6	DLG3_RAT	1	3	534	93481	0.05758	17.3671	0.0857739	11.6586	4.278	3	DLG3_RAT	1	3	427	93481	0.2041	4.89956	0.38648	2.58746	12.93	2	Disks large homolog 3 OS=Rattus norvegicus GN=Dlg3 PE=1 SV=1	3.66667
AP2A2_RAT	103979	77		883	0.6082	1.6442	0.74343	1.34512	1.32	12	AP2A2_RAT	99	0	657	103979	0.7201	1.3887	1.07269	0.932232	1.124	9	AP2A2_RAT	102	0	725	103979	0.8357	1.1966	1.58247	0.631925	1.242	6	AP-2 complex subunit alpha-2 OS=Rattus norvegicus GN=Ap2a2 PE=1 SV=3	9
M2OM_RAT	34222	78		864	3092	0.000323415	3779.49	0.000264586	28.39	9	M2OM_RAT	61	0	915	34222	502.3	0.00199084	748.25	0.00133645	11.4	10	M2OM_RAT	77	0	907	34222	0.06416	15.586	0.121492	8.23099	1.726	10	Mitochondrial 2-oxoglutarate/malate carrier protein OS=Rattus norvegicus GN=Slc25a11 PE=1 SV=3	9.66667
EPS8_RAT	91871	79		847	0.7683	1.30157	0.939127	1.06482	1.058	3	EPS8_RAT	113	0	579	91871	0.7066	1.41523	1.05258	0.950042	1.188	4	EPS8_RAT	115	0	656	91871	0.6598	1.51561	1.24938	0.800394	1.123	5	Epidermal growth factor receptor kinase substrate 8 OS=Rattus norvegicus GN=Eps8 PE=1 SV=2	4
SPTN2_RAT	270897	80		844	1.152	0.868056	1.40814	0.710156	1.144	7	SPTN2_RAT	52	0	1004	270897	0.8407	1.18948	1.25235	0.798501	1.113	6	SPTN2_RAT	66	0	1065	270897	0.7996	1.25063	1.51411	0.660455	1.134	7	Spectrin beta chain, non-erythrocytic 2 OS=Rattus norvegicus GN=Sptbn2 PE=1 SV=2	6.66667
FMR1_RAT	66740	81	1	832	1.154	0.866551	1.41059	0.708925	1.074	12	FMR1_RAT	70	1	831	66740	0.9776	1.02291	1.45628	0.686682	1.076	11	FMR1_RAT	74	1	938	66740	0.9112	1.09745	1.72543	0.579565	1.055	11	Synaptic functional regulator FMR1 OS=Rattus norvegicus GN=Fmr1 PE=1 SV=2	11.3333
NCKP1_RAT	128781	82		829	1.034	0.967118	1.2639	0.791199	1.078	15	NCKP1_RAT	66	0	876	128781	0.8033	1.24486	1.19663	0.835678	1.094	11	NCKP1_RAT	84	0	830	128781	0.5391	1.85494	1.02083	0.979596	1.051	14	Nck-associated protein 1 OS=Rattus norvegicus GN=Nckap1 PE=2 SV=1	13.3333
PFKAL_RAT	85284	26	3	822	0.4688	2.13311	0.573035	1.74509	1.084	9	PFKAL_RAT	26	3	868	85284	0.3225	3.10078	0.480411	2.08155	1.169	9	PFKAL_RAT	26	3	763	85284	0.3461	2.88934	0.655368	1.52586	1.107	9	ATP-dependent 6-phosphofructokinase, liver type OS=Rattus norvegicus GN=Pfkl PE=1 SV=3	9
ECHA_RAT	82613	83		810	0.6254	1.59898	0.764454	1.30812	1.056	13	ECHA_RAT	54	0	1000	82613	0.4472	2.23614	0.66617	1.50112	1.055	12	ECHA_RAT	52	0	1266	82613	0.4229	2.36463	0.800795	1.24876	1.029	16	Trifunctional enzyme subunit alpha, mitochondrial OS=Rattus norvegicus GN=Hadha PE=1 SV=2	13.6667
NPM_RAT	32540	84		799	1.14	0.877193	1.39347	0.717632	1.286	7	NPM_RAT	87	0	715	32540	0.9578	1.04406	1.42678	0.700877	1.429	6	NPM_RAT	97	1	752	32540	0.7295	1.3708	1.38137	0.72392	1.286	7	Nucleophosmin OS=Rattus norvegicus GN=Npm1 PE=1 SV=1	6.66667
ACTC_RAT	41992	46	2	793	0.3006	3.32668	0.367437	2.72156	1.133	8	ACTC_RAT	32	3	841	41992	0.3059	3.26904	0.455683	2.19451	1.071	11	ACTC_RAT	40	3	1053	41992	0.3454	2.89519	0.654043	1.52895	1.173	10	Actin, alpha cardiac muscle 1 OS=Rattus norvegicus GN=Actc1 PE=2 SV=1	9.66667
AGAP2_RAT	124361	85		782	1.081	0.925069	1.32135	0.756799	1.039	12	AGAP2_RAT	93	0	685	124361	1.134	0.881834	1.68926	0.591975	1.457	6	AGAP2_RAT	50	0	1289	124361	0.8308	1.20366	1.57319	0.635652	1.337	12	Arf-GAP with GTPase, ANK repeat and PH domain-containing protein 2 OS=Rattus norvegicus GN=Agap2 PE=1 SV=1	10
RS8_RAT	24190	87		767	1.029	0.971817	1.25779	0.795044	1.235	10	RS8_RAT	63	0	896	24190	0.7014	1.42572	1.04484	0.957086	1.417	8	RS8_RAT	70	0	993	24190	0.5601	1.7854	1.06059	0.942867	1.117	13	40S ribosomal protein S8 OS=Rattus norvegicus GN=Rps8 PE=1 SV=2	10.3333
LIPA3_RAT	133347	88	1	764	1.916	0.521921	2.34201	0.426983	1.159	8	LIPA3_RAT	98	1	659	133347	1.664	0.600962	2.47877	0.403425	1.06	5	LIPA3_RAT	71	1	972	133347	1.664	0.600962	3.15092	0.317368	1.026	11	Liprin-alpha-3 OS=Rattus norvegicus GN=Ppfia3 PE=1 SV=2	8
FXR1_RAT	63908	81	2	763	1.123	0.890472	1.37269	0.728495	1.088	11	FXR1_RAT	70	2	710	63908	0.8872	1.12714	1.32161	0.75665	1.083	8	FXR1_RAT	74	2	771	63908	0.8388	1.19218	1.58834	0.62959	1.043	12	Fragile X mental retardation syndrome-related protein 1 OS=Rattus norvegicus GN=Fxr1 PE=1 SV=1	10.3333
RS3A_RAT	29926	89		755	1.077	0.928505	1.31646	0.75961	1.183	15	RS3A_RAT	76	0	805	29926	0.9975	1.00251	1.48592	0.672982	1.171	12	RS3A_RAT	37	0	1576	29926	0.8778	1.13921	1.66219	0.601618	1.208	18	40S ribosomal protein S3a OS=Rattus norvegicus GN=Rps3a PE=1 SV=2	15
AT2B3_RAT	138471	50	3	752	0.6862	1.4573	0.838773	1.19222	1.1	8	AT2B3_RAT	53	3	594	138471	0.9064	1.10327	1.35022	0.740622	1.205	8	AT2B3_RAT	49	3	998	138471	0.4432	2.25632	0.839235	1.19156	1.067	11	Plasma membrane calcium-transporting ATPase 3 OS=Rattus norvegicus GN=Atp2b3 PE=1 SV=2	9
AT2A2_RAT	114694	90		746	0.2372	4.21585	0.28994	3.44899	1.121	4	AT2A2_RAT	105	0	632	114694	0.6686	1.49566	0.995978	1.00404	1.462	4	AT2A2_RAT	89	0	798	114694	0.3814	2.62192	0.722212	1.38464	1.238	8	Sarcoplasmic/endoplasmic reticulum calcium ATPase 2 OS=Rattus norvegicus GN=Atp2a2 PE=1 SV=1	5.33333
DYN1_RAT	97234	91	1	746	0.6797	1.47124	0.830828	1.20362	1.397	9	DYN1_RAT	116	1	571	97234	0.7839	1.27567	1.16773	0.856359	1.077	9	DYN1_RAT	94	1	770	97234	0.6012	1.66334	1.13842	0.87841	1.045	16	Dynamin-1 OS=Rattus norvegicus GN=Dnm1 PE=1 SV=2	11.3333
RL19_RAT	23451	92		740	1.348	0.74184	1.64772	0.606899	1.109	4	RL19_RAT	128	0	528	23451	0.8687	1.15115	1.29406	0.772764	1.068	4	RL19_RAT	137	0	576	23451	0.7274	1.37476	1.37739	0.72601	1.236	6	60S ribosomal protein L19 OS=Rattus norvegicus GN=Rpl19 PE=1 SV=1	4.66667
SRSF2_RAT	25461	93		728	1.513	0.660939	1.84941	0.540714	1.111	3	SRSF2_RAT	146	0	470	25461	1.033	0.968054	1.53881	0.649855	1.157	3	SRSF2_RAT	153	0	516	25461	1.059	0.944287	2.0053	0.498678	1.094	4	Serine/arginine-rich splicing factor 2 OS=Rattus norvegicus GN=Srsf2 PE=1 SV=3	3.33333
1433Z_RAT	27754	95	1	715	0.9913	1.00878	1.21171	0.82528	1.235	7	1433Z_RAT	86	2	530	27754	0.6687	1.49544	0.996127	1.00389	1.306	7	1433Z_RAT	120	1	620	27754	0.4515	2.21484	0.854952	1.16966	2.421	6	14-3-3 protein zeta/delta OS=Rattus norvegicus GN=Ywhaz PE=1 SV=1	6.66667
RS2_RAT	31212	94		715	1.091	0.91659	1.33358	0.749863	2.458	15	RS2_RAT	80	0	791	31212	0.9207	1.08613	1.37152	0.729119	1.14	12	RS2_RAT	107	0	689	31212	0.8367	1.19517	1.58436	0.63117	1.131	14	40S ribosomal protein S2 OS=Rattus norvegicus GN=Rps2 PE=1 SV=1	13.6667
DLGP2_RAT	118903	96	1	714	0.6032	1.65782	0.737318	1.35627	1.101	7	DLGP2_RAT	168	2	355	118903	0.4164	2.40154	0.620289	1.61215	1.405	3	DLGP2_RAT	125	1	615	118903	0.4903	2.03957	0.928423	1.0771	1.208	3	Disks large-associated protein 2 OS=Rattus norvegicus GN=Dlgap2 PE=1 SV=3	4.33333
RL13_RAT	24294	97		713	1.117	0.895255	1.36536	0.732408	1.312	5	RL13_RAT	84	0	746	24294	0.8551	1.16945	1.2738	0.785054	1.38	6	RL13_RAT	82	0	866	24294	0.7254	1.37855	1.3736	0.728012	1.575	8	60S ribosomal protein L13 OS=Rattus norvegicus GN=Rpl13 PE=1 SV=2	6.33333
OPA1_RAT	111238	98		710	0.7925	1.26183	0.968708	1.0323	1.059	17	OPA1_RAT	65	0	888	111238	0.6426	1.55618	0.957247	1.04466	1.056	17	OPA1_RAT	59	0	1127	111238	0.6221	1.60746	1.178	0.848899	1.032	23	Dynamin-like 120 kDa protein, mitochondrial OS=Rattus norvegicus GN=Opa1 PE=1 SV=1	19
KPCG_RAT	78307	99		709	1.027	0.97371	1.25535	0.796592	1.099	10	KPCG_RAT	126	1	537	78307	0.7427	1.34644	1.10636	0.903864	1.051	12	KPCG_RAT	150	0	521	78307	0.8282	1.20744	1.56826	0.637648	1.048	8	Protein kinase C gamma type OS=Rattus norvegicus GN=Prkcg PE=1 SV=1	10
LRRC7_RAT	166774	100		707	0.7082	1.41203	0.865664	1.15518	1.119	6	LRRC7_RAT	118	0	555	166774	0.7356	1.35943	1.09578	0.912588	1.104	5	LRRC7_RAT	95	0	766	166774	0.5979	1.67252	1.13217	0.883258	1.101	8	Leucine-rich repeat-containing protein 7 OS=Rattus norvegicus GN=Lrrc7 PE=1 SV=2	6.33333
HS71A_RAT	70142	15	4	702	1.051	0.951475	1.28468	0.778402	1.484	3	HS71A_RAT	23	4	359	70142	0.9122	1.09625	1.35886	0.735913	1.283	3	HS71A_RAT	16	4	375	70142	0.8717	1.14718	1.65063	0.605828	1.039	4	Heat shock 70 kDa protein 1A OS=Rattus norvegicus GN=Hspa1a PE=2 SV=1	3.33333
EIF3A_RAT	163097	101		694	1.662	0.601685	2.03154	0.492238	1.038	12	EIF3A_RAT	115	0	576	163097	1.602	0.62422	2.38641	0.419039	1.036	14	EIF3A_RAT	65	0	1067	163097	1.254	0.797448	2.37455	0.421132	1.043	21	Eukaryotic translation initiation factor 3 subunit A OS=Rattus norvegicus GN=Eif3a PE=2 SV=2	15.6667
EIF3B_RAT	90854	102		693	2.169	0.461042	2.65127	0.377178	1.186	8	EIF3B_RAT	349	0	167	90854	1.709	0.585138	2.54581	0.392803	1.297	4	EIF3B_RAT	239	0	337	90854	1.299	0.769823	2.45976	0.406543	1.362	5	Eukaryotic translation initiation factor 3 subunit B OS=Rattus norvegicus GN=Eif3b PE=1 SV=1	5.66667
YMEL1_RAT	79817	103	1	686	0.4422	2.26142	0.540521	1.85007	13.19	4	YMEL1_RAT	133	1	520	79817	0.08021	12.4673	0.119485	8.36928	1.22	2	YMEL1_RAT	156	1	512	79817	0.01748	57.2082	0.0330998	30.2117	4.305	2	ATP-dependent zinc metalloprotease YME1L1 OS=Rattus norvegicus GN=Yme1l1 PE=2 SV=1	2.66667
MAST1_RAT	170923	104	1	680	0.5942	1.68294	0.726317	1.37681	1.075	7	MAST1_RAT	110	0	609	170923	0.3713	2.69324	0.553106	1.80797	1.299	5	MAST1_RAT	128	1	609	170923	0.4091	2.44439	0.774664	1.29088	1.055	8	Microtubule-associated serine/threonine-protein kinase 1 OS=Rattus norvegicus GN=Mast1 PE=1 SV=1	6.66667
TENR_RAT	149277	105		678	1.462	0.683995	1.78707	0.559576	1.105	7	TENR_RAT	95	0	670	149277	1.237	0.808407	1.84269	0.542684	1.29	4	TENR_RAT	91	1	791	149277	0.9705	1.0304	1.83772	0.544152	1.061	4	Tenascin-R OS=Rattus norvegicus GN=Tnr PE=1 SV=1	5
SYYC_RAT	59078	106		667	0.6171	1.62048	0.754309	1.32572	1.046	8	SYYC_RAT	139	0	492	59078	0.4943	2.02306	0.736332	1.35808	1.081	6	SYYC_RAT	172	0	465	59078	0.4959	2.01654	0.939027	1.06493	1.081	6	Tyrosine--tRNA ligase, cytoplasmic OS=Rattus norvegicus GN=Yars PE=2 SV=3	6.66667
ITPR1_RAT	313065	107	1	659	1.36	0.735294	1.66239	0.601544	1.13	3	ITPR1_RAT	94	1	679	313065	0.967	1.03413	1.44049	0.694209	1.03	5	ITPR1_RAT	152	0	519	313065	1.223	0.817661	2.31585	0.431807	1.053	5	Inositol 1,4,5-trisphosphate receptor type 1 OS=Rattus norvegicus GN=Itpr1 PE=1 SV=2	4.33333
ELAV2_RAT	39481	108	1	656	0.8031	1.24517	0.981665	1.01868	1.069	12	ELAV2_RAT	88	1	715	39481	0.785	1.27389	1.16937	0.855159	1.055	12	ELAV2_RAT	110	1	681	39481	0.6688	1.49522	1.26643	0.789623	1.099	11	ELAV-like protein 2 OS=Rattus norvegicus GN=Elavl2 PE=1 SV=1	11.6667
CNKR2_RAT	117317	110		650	0.9551	1.04701	1.16746	0.85656	1.072	9	CNKR2_RAT	148	0	458	117317	0.8672	1.15314	1.29182	0.774101	1.212	6	CNKR2_RAT	112	1	665	117317	0.6941	1.44071	1.31433	0.760841	1.255	5	Connector enhancer of kinase suppressor of ras 2 OS=Rattus norvegicus GN=Cnksr2 PE=1 SV=1	6.66667
LYRIC_RAT	63931	109		650	1.029	0.971817	1.25779	0.795044	1.071	7	LYRIC_RAT	132	0	523	63931	0.8728	1.14574	1.30016	0.769134	1.028	7	LYRIC_RAT	87	0	813	63931	0.7499	1.33351	1.42	0.704227	1.029	8	Protein LYRIC OS=Rattus norvegicus GN=Mtdh PE=1 SV=2	7.33333
CSKI1_RAT	150255	111		639	0.7162	1.39626	0.875443	1.14228	1.075	4	CSKI1_RAT	144	0	473	150255	0.7066	1.41523	1.05258	0.950042	1.126	6	CSKI1_RAT	127	0	611	150255	0.5613	1.78158	1.06287	0.940852	1.03	11	Caskin-1 OS=Rattus norvegicus GN=Caskin1 PE=1 SV=1	7
NCDN_RAT	78873	112		633	1.024	0.976562	1.25168	0.798926	1.017	2	#N/A	#N/A	#N/A	#N/A	#N/A	#N/A	#N/A	#N/A	#N/A	#N/A	#N/A	NCDN_RAT	133	0	585	78873	0.52	1.92308	0.984662	1.01558	1.14	2	Neurochondrin OS=Rattus norvegicus GN=Ncdn PE=1 SV=2	#N/A
S27A1_RAT	71238	113		632	0.07206	13.8773	0.0880821	11.353	1.275	6	S27A1_RAT	81	0	783	71238	0.03935	25.413	0.0586176	17.0597	4.422	3	S27A1_RAT	98	0	744	71238	0.06181	16.1786	0.117042	8.54392	1.171	7	Long-chain fatty acid transport protein 1 OS=Rattus norvegicus GN=Slc27a1 PE=2 SV=1	5.33333
SFXN3_RAT	35411	114	1	628	0.191	5.2356	0.233468	4.28325	1.118	9	SFXN3_RAT	72	1	825	35411	0.1553	6.43915	0.231342	4.3226	1.127	11	SFXN3_RAT	105	1	695	35411	0.09778	10.227	0.185154	5.4009	1.203	10	Sideroflexin-3 OS=Rattus norvegicus GN=Sfxn3 PE=2 SV=1	10
1433T_RAT	27761	95	2	625	0.9755	1.02512	1.1924	0.838647	1.219	8	1433T_RAT	86	1	718	27761	0.6632	1.50784	0.987934	1.01221	1.261	10	1433T_RAT	120	2	617	27761	0.5915	1.69062	1.12005	0.892815	4.072	5	14-3-3 protein theta OS=Rattus norvegicus GN=Ywhaq PE=1 SV=1	7.66667
RL4_RAT	47227	116		616	1.022	0.978474	1.24924	0.800489	1.059	4	RL4_RAT	123	0	546	47227	0.6642	1.50557	0.989424	1.01069	1.098	4	RL4_RAT	135	0	582	47227	0.7022	1.4241	1.32967	0.752065	1.081	5	60S ribosomal protein L4 OS=Rattus norvegicus GN=Rpl4 PE=1 SV=3	4.33333
GNAO_RAT	40043	117	1	612	0.5648	1.77054	0.69038	1.44848	1.097	8	GNAO_RAT	64	1	896	40043	0.4378	2.28415	0.652167	1.53335	1.041	9	GNAO_RAT	93	1	774	40043	0.3481	2.87274	0.659155	1.51709	1.09	9	Guanine nucleotide-binding protein G(o) subunit alpha OS=Rattus norvegicus GN=Gnao1 PE=1 SV=2	8.66667
SYTL5_RAT	83593	118		612	1.429	0.69979	1.74673	0.572498	1.16	6	SYTL5_RAT	149	0	457	83593	0.8671	1.15327	1.29167	0.77419	1.147	5	SYTL5_RAT	329	0	221	83593	0.9043	1.10583	1.71237	0.583988	1.094	3	Synaptotagmin-like protein 5 OS=Rattus norvegicus GN=Sytl5 PE=2 SV=1	4.66667
PURB_RAT	33398	119		608	1.08	0.925926	1.32013	0.7575	1.258	9	PURB_RAT	67	0	866	33398	0.6608	1.51332	0.984359	1.01589	1.337	12	PURB_RAT	92	0	786	33398	0.65	1.53846	1.23083	0.812462	1.188	12	Transcriptional activator protein Pur-beta OS=Rattus norvegicus GN=Purb PE=1 SV=3	11
LONM_RAT	105726	120		603	0.03673	27.2257	0.0448967	22.2733	27.9	2	LONM_RAT	159	0	433	105726	0.09129	10.9541	0.13599	7.35349	3.984	3	LONM_RAT	147	0	547	105726	0.4392	2.27687	0.831661	1.20241	1.216	3	Lon protease homolog, mitochondrial OS=Rattus norvegicus GN=Lonp1 PE=2 SV=1	2.66667
PP2BA_RAT	58606	121	1	596	0.2929	3.41413	0.358025	2.7931	1.229	4	PP2BA_RAT	117	1	560	58606	0.2514	3.97772	0.374497	2.67025	1.124	6	PP2BA_RAT	132	1	591	58606	0.2366	4.22654	0.448021	2.23204	1.085	2	Serine/threonine-protein phosphatase 2B catalytic subunit alpha isoform OS=Rattus norvegicus GN=Ppp3ca PE=1 SV=1	4
DPYL3_RAT	61928	30	3	594	0.3808	2.62605	0.465469	2.14837	1.935	5	#N/A	#N/A	#N/A	#N/A	#N/A	#N/A	#N/A	#N/A	#N/A	#N/A	#N/A	#N/A	#N/A	#N/A	#N/A	#N/A	#N/A	#N/A	#N/A	#N/A	#N/A	#N/A	Dihydropyrimidinase-related protein 3 OS=Rattus norvegicus GN=Dpysl3 PE=1 SV=2	#N/A
EIF3C_RAT	105369	122		594	1.571	0.636537	1.9203	0.520751	1.056	7	EIF3C_RAT	137	0	498	105369	1.442	0.693481	2.14807	0.465534	1.134	6	EIF3C_RAT	139	0	571	105369	0.7851	1.27372	1.48665	0.672653	1.097	8	Eukaryotic translation initiation factor 3 subunit C OS=Rattus norvegicus GN=Eif3c PE=1 SV=1	7
RL14_RAT	23324	123		590	0.9298	1.0755	1.13654	0.879867	1.188	4	RL14_RAT	134	0	517	23324	0.5839	1.71262	0.869805	1.14968	1.14	5	RL14_RAT	100	0	737	23324	0.8408	1.18934	1.59212	0.628092	2.482	5	60S ribosomal protein L14 OS=Rattus norvegicus GN=Rpl14 PE=1 SV=3	4.66667
TCP4_RAT	14432	124		586	1.08	0.925926	1.32013	0.7575	1.223	3	TCP4_RAT	108	0	621	14432	0.7522	1.32943	1.12051	0.892449	1.072	2	#N/A	#N/A	#N/A	#N/A	#N/A	#N/A	#N/A	#N/A	#N/A	#N/A	#N/A	Activated RNA polymerase II transcriptional coactivator p15 OS=Rattus norvegicus GN=Sub1 PE=1 SV=3	#N/A
TXTP_RAT	33814	125		582	0.2204	4.53721	0.269405	3.71189	1.128	8	TXTP_RAT	109	0	617	33814	0.1243	8.04505	0.185163	5.40064	1.129	7	TXTP_RAT	145	0	558	33814	0.08769	11.4038	0.166048	6.02235	1.21	8	Tricarboxylate transport protein, mitochondrial OS=Rattus norvegicus GN=Slc25a1 PE=1 SV=1	7.66667
INP5E_RAT	72193	127		572	0.4492	2.22618	0.549077	1.82124	1.209	3	INP5E_RAT	183	0	356	72193	0.4519	2.21288	0.673171	1.48551	1.248	3	INP5E_RAT	208	0	394	72193	0.4184	2.39006	0.792274	1.26219	1.279	2	72 kDa inositol polyphosphate 5-phosphatase OS=Rattus norvegicus GN=Inpp5e PE=1 SV=2	2.66667
PHAR1_RAT	66175	128		561	1.02	0.980392	1.24679	0.802059	1.179	8	PHAR1_RAT	124	0	538	66175	1.046	0.956023	1.55817	0.641778	1.092	6	PHAR1_RAT	85	0	830	66175	0.9621	1.03939	1.82181	0.548903	1.048	6	Phosphatase and actin regulator 1 OS=Rattus norvegicus GN=Phactr1 PE=1 SV=1	6.66667
KIF2A_RAT	79743	129		559	1.097	0.911577	1.34091	0.745761	1.043	9	KIF2A_RAT	154	0	450	79743	0.9327	1.07216	1.38939	0.719738	1.094	11	KIF2A_RAT	129	0	606	79743	0.9354	1.06906	1.77126	0.564571	1.036	9	Kinesin-like protein KIF2A OS=Rattus norvegicus GN=Kif2a PE=1 SV=2	9.66667
HP1B3_RAT	60769	130		556	1.324	0.755287	1.61838	0.6179	1.066	9	HP1B3_RAT	100	0	657	60769	0.9178	1.08956	1.3672	0.731423	1.034	9	HP1B3_RAT	200	0	407	60769	0.8896	1.1241	1.68453	0.593638	1.037	13	Heterochromatin protein 1-binding protein 3 OS=Rattus norvegicus GN=Hp1bp3 PE=1 SV=1	10.3333
ASGL1_RAT	34389	131		554	0.5015	1.99402	0.613006	1.63131	1.447	2	#N/A	#N/A	#N/A	#N/A	#N/A	#N/A	#N/A	#N/A	#N/A	#N/A	#N/A	#N/A	#N/A	#N/A	#N/A	#N/A	#N/A	#N/A	#N/A	#N/A	#N/A	#N/A	Isoaspartyl peptidase/L-asparaginase OS=Rattus norvegicus GN=Asrgl1 PE=1 SV=1	#N/A
LIPA4_RAT	117931	88	2	554	1.041	0.960615	1.27246	0.785879	1.494	2	LIPA4_RAT	98	2	355	117931	1.094	0.914077	1.62967	0.61362	1.114	2	#N/A	#N/A	#N/A	#N/A	#N/A	#N/A	#N/A	#N/A	#N/A	#N/A	#N/A	Liprin-alpha-4 (Fragment) OS=Rattus norvegicus GN=Ppfia4 PE=1 SV=1	#N/A
IRS1_RAT	131096	132		553	0.388	2.57732	0.47427	2.10851	1.102	2	IRS1_RAT	259	0	258	131096	0.3643	2.74499	0.542678	1.84271	1.216	3	IRS1_RAT	161	0	502	131096	0.5803	1.72325	1.09884	0.910047	2.271	4	Insulin receptor substrate 1 OS=Rattus norvegicus GN=Irs1 PE=1 SV=1	3
RL8_RAT	28007	133		553	1.192	0.838926	1.45703	0.686326	1.322	11	RL8_RAT	153	0	454	28007	0.8123	1.23107	1.21004	0.826419	1.171	7	RL8_RAT	83	0	844	28007	0.4078	2.45218	0.772202	1.295	1.084	12	60S ribosomal protein L8 OS=Rattus norvegicus GN=Rpl8 PE=2 SV=2	10
HCD2_RAT	27229	134		550	0.4907	2.03791	0.599804	1.66721	1.093	5	HCD2_RAT	114	0	577	27229	0.3236	3.09023	0.48205	2.07447	1.077	7	HCD2_RAT	111	0	670	27229	0.308	3.24675	0.583223	1.71461	1.129	8	3-hydroxyacyl-CoA dehydrogenase type-2 OS=Rattus norvegicus GN=Hsd17b10 PE=1 SV=3	6.66667
PLAK_RAT	81749	135		549	0.0983	10.1729	0.120156	8.32248	5.292	2	#N/A	#N/A	#N/A	#N/A	#N/A	#N/A	#N/A	#N/A	#N/A	#N/A	#N/A	#N/A	#N/A	#N/A	#N/A	#N/A	#N/A	#N/A	#N/A	#N/A	#N/A	#N/A	Junction plakoglobin OS=Rattus norvegicus GN=Jup PE=1 SV=1	#N/A
EF1A2_RAT	50422	136	1	548	0.6213	1.60953	0.759443	1.31676	1.112	3	EF1A2_RAT	122	1	550	50422	0.4232	2.36295	0.630419	1.58625	1.099	3	EF1A2_RAT	118	1	632	50422	0.2912	3.43407	0.551411	1.81353	1.347	2	Elongation factor 1-alpha 2 OS=Rattus norvegicus GN=Eef1a2 PE=1 SV=1	2.66667
ELAV4_RAT	40938	108	2	545	0.8431	1.1861	1.03056	0.970348	1.049	11	ELAV4_RAT	88	2	704	40938	0.7634	1.30993	1.1372	0.879356	1.066	12	ELAV4_RAT	110	2	676	40938	0.6356	1.57332	1.20356	0.830868	1.098	11	ELAV-like protein 4 OS=Rattus norvegicus GN=Elavl4 PE=1 SV=1	11.3333
MFF_RAT	24955	137		540	0.9265	1.07933	1.1325	0.883001	1.134	3	MFF_RAT	200	0	328	24955	0.8564	1.16768	1.27573	0.783863	1.119	3	MFF_RAT	166	0	481	24955	0.618	1.61812	1.17023	0.854531	1.209	2	Mitochondrial fission factor OS=Rattus norvegicus GN=Mff PE=1 SV=1	2.66667
TRIM9_RAT	79155	138		537	0.5776	1.7313	0.706026	1.41638	1.267	4	TRIM9_RAT	129	0	525	79155	0.4508	2.21828	0.671533	1.48913	1.312	4	TRIM9_RAT	141	0	569	79155	0.5155	1.93986	0.976141	1.02444	1.135	3	E3 ubiquitin-protein ligase TRIM9 OS=Rattus norvegicus GN=Trim9 PE=1 SV=1	3.66667
CBR1_RAT	30559	139		535	1.057	0.946074	1.29202	0.773983	1.066	10	CBR1_RAT	104	0	635	30559	0.7905	1.26502	1.17757	0.849209	1.051	8	CBR1_RAT	130	0	599	30559	0.3909	2.5582	0.740201	1.35098	1.183	10	Carbonyl reductase [NADPH] 1 OS=Rattus norvegicus GN=Cbr1 PE=1 SV=2	9.33333
DLGP4_RAT	107968	96	2	531	0.7575	1.32013	0.925926	1.08	1.253	3	DLGP4_RAT	168	1	400	107968	0.5217	1.91681	0.777149	1.28675	1.301	3	#N/A	#N/A	#N/A	#N/A	#N/A	#N/A	#N/A	#N/A	#N/A	#N/A	#N/A	Disks large-associated protein 4 OS=Rattus norvegicus GN=Dlgap4 PE=1 SV=1	#N/A
AAPK1_RAT	63933	140	1	529	0.2694	3.71195	0.3293	3.03675	1.252	6	AAPK1_RAT	127	1	533	63933	0.1472	6.79348	0.219276	4.56046	1.111	5	AAPK1_RAT	151	1	520	63933	0.1676	5.96659	0.317364	3.15095	1.17	5	5'-AMP-activated protein kinase catalytic subunit alpha-1 OS=Rattus norvegicus GN=Prkaa1 PE=1 SV=2	5.33333
ATAT_RAT	47298	142		522	0.7202	1.3885	0.880332	1.13593	1.06	14	ATAT_RAT	112	0	594	47298	0.5683	1.75963	0.846566	1.18124	1.065	12	ATAT_RAT	88	0	804	47298	0.5239	1.90876	0.992047	1.00802	1.081	12	Alpha-tubulin N-acetyltransferase 1 OS=Rattus norvegicus GN=Atat1 PE=1 SV=1	12.6667
PP2BB_RAT	59076	121	2	515	0.2953	3.38639	0.360958	2.7704	1.071	6	PP2BB_RAT	117	2	483	59076	0.2476	4.03877	0.368837	2.71123	1.078	6	PP2BB_RAT	132	2	581	59076	0.2248	4.4484	0.425677	2.3492	1.097	4	Serine/threonine-protein phosphatase 2B catalytic subunit beta isoform OS=Rattus norvegicus GN=Ppp3cb PE=1 SV=1	5.33333
STXB1_RAT	67526	143		513	0.41	2.43902	0.501161	1.99537	1.163	4	STXB1_RAT	158	0	435	67526	0.1922	5.20291	0.28631	3.49272	1.235	4	STXB1_RAT	164	0	484	67526	0.1053	9.49668	0.199394	5.01519	1.823	2	Syntaxin-binding protein 1 OS=Rattus norvegicus GN=Stxbp1 PE=1 SV=1	3.33333
SV2A_RAT	82608	144		509	0.4681	2.1363	0.572179	1.7477	1.081	6	SV2A_RAT	111	0	607	82608	0.4425	2.25989	0.659169	1.51706	1.185	7	SV2A_RAT	143	0	566	82608	0.3376	2.96209	0.639273	1.56428	1.316	4	Synaptic vesicle glycoprotein 2A OS=Rattus norvegicus GN=Sv2a PE=1 SV=2	5.66667
PURA_RAT	15313	145		508	0.6457	1.54871	0.789268	1.267	1.096	6	PURA_RAT	89	0	714	15313	0.6396	1.56348	0.952778	1.04956	1.134	6	PURA_RAT	104	0	698	15313	0.4484	2.23015	0.849082	1.17774	1.407	9	Transcriptional activator protein Pur-alpha (Fragments) OS=Rattus norvegicus GN=Pura PE=1 SV=1	7
SYGP1_RAT	144631	146	1	507	0.818	1.22249	0.999878	1.00012	1.2	5	SYGP1_RAT	221	1	302	144631	0.6066	1.64853	0.90362	1.10666	1.29	3	SYGP1_RAT	155	1	513	144631	0.6092	1.6415	1.15357	0.866875	1.172	5	Ras/Rap GTPase-activating protein SynGAP OS=Rattus norvegicus GN=Syngap1 PE=1 SV=2	4.33333
AP1B1_RAT	104522	63	2	503	4.039	0.247586	4.93705	0.20255	1.772	2	#N/A	#N/A	#N/A	#N/A	#N/A	#N/A	#N/A	#N/A	#N/A	#N/A	#N/A	#N/A	#N/A	#N/A	#N/A	#N/A	#N/A	#N/A	#N/A	#N/A	#N/A	#N/A	AP-1 complex subunit beta-1 OS=Rattus norvegicus GN=Ap1b1 PE=1 SV=1	#N/A
TRIM3_RAT	80745	147	1	500	1.055	0.947867	1.28957	0.77545	1.032	7	TRIM3_RAT	161	1	430	80745	0.7935	1.26024	1.18203	0.845999	1.043	7	TRIM3_RAT	203	0	402	80745	0.8334	1.1999	1.57811	0.633669	1.013	6	Tripartite motif-containing protein 3 OS=Rattus norvegicus GN=Trim3 PE=1 SV=1	6.66667
SDHA_RAT	71570	148		493	0.4914	2.035	0.60066	1.66484	1.102	11	SDHA_RAT	138	0	497	71570	0.3532	2.83126	0.526143	1.90062	1.098	8	SDHA_RAT	149	0	523	71570	0.3072	3.25521	0.581708	1.71908	1.068	11	Succinate dehydrogenase [ubiquinone] flavoprotein subunit, mitochondrial OS=Rattus norvegicus GN=Sdha PE=1 SV=1	10
ACSL6_RAT	78130	149		492	0.5453	1.83385	0.666544	1.50028	1.035	7	ACSL6_RAT	227	0	299	78130	0.4243	2.35682	0.632057	1.58214	1.149	7	ACSL6_RAT	169	1	471	78130	0.3524	2.83768	0.667298	1.49858	1.071	5	Long-chain-fatty-acid--CoA ligase 6 OS=Rattus norvegicus GN=Acsl6 PE=1 SV=1	6.33333
DDX46_RAT	117313	152		491	1.552	0.64433	1.89708	0.527126	1.61	2	#N/A	#N/A	#N/A	#N/A	#N/A	#N/A	#N/A	#N/A	#N/A	#N/A	#N/A	#N/A	#N/A	#N/A	#N/A	#N/A	#N/A	#N/A	#N/A	#N/A	#N/A	#N/A	Probable ATP-dependent RNA helicase DDX46 OS=Rattus norvegicus GN=Ddx46 PE=1 SV=1	#N/A
GLNA_RAT	42240	150		491	0.474	2.1097	0.579391	1.72595	1.104	7	GLNA_RAT	71	0	829	42240	0.3694	2.70709	0.550276	1.81727	1.073	9	GLNA_RAT	117	0	641	42240	0.4815	2.07684	0.911759	1.09678	1.148	8	Glutamine synthetase OS=Rattus norvegicus GN=Glul PE=1 SV=3	8
ODO1_RAT	116221	151		491	0.767	1.30378	0.937538	1.06662	1.1	7	ODO1_RAT	232	0	292	116221	0.7258	1.37779	1.08119	0.92491	1.031	8	ODO1_RAT	280	0	281	116221	0.5731	1.7449	1.08521	0.92148	1.079	5	2-oxoglutarate dehydrogenase, mitochondrial OS=Rattus norvegicus GN=Ogdh PE=1 SV=1	6.66667
EF1A1_RAT	50082	136	2	484	0.5276	1.89538	0.644909	1.55061	1.191	4	EF1A1_RAT	122	2	480	50082	0.3911	2.55689	0.582601	1.71644	1.198	3	#N/A	#N/A	#N/A	#N/A	#N/A	#N/A	#N/A	#N/A	#N/A	#N/A	#N/A	Elongation factor 1-alpha 1 OS=Rattus norvegicus GN=Eef1a1 PE=2 SV=1	#N/A
MECP2_RAT	53015	153		479	1.238	0.807754	1.51326	0.660824	1.113	6	MECP2_RAT	174	0	376	53015	0.9561	1.04592	1.42425	0.702123	1.135	4	MECP2_RAT	199	0	408	53015	0.9179	1.08944	1.73812	0.575335	1.023	4	Methyl-CpG-binding protein 2 OS=Rattus norvegicus GN=Mecp2 PE=1 SV=1	4.66667
WASF1_RAT	61477	154		477	0.5731	1.7449	0.700526	1.4275	1.273	3	WASF1_RAT	162	0	423	61477	0.4825	2.07254	0.718755	1.3913	1.282	3	WASF1_RAT	184	0	443	61477	0.4704	2.12585	0.89074	1.12266	1.421	3	Wiskott-Aldrich syndrome protein family member 1 OS=Rattus norvegicus GN=Wasf1 PE=1 SV=1	3
SFXN5_RAT	37281	155		473	0.2798	3.57398	0.342012	2.92387	1.33	3	SFXN5_RAT	165	0	417	37281	0.2438	4.10172	0.363176	2.75349	1.327	5	SFXN5_RAT	189	0	440	37281	0.1094	9.14077	0.207158	4.82724	1.238	5	Sideroflexin-5 OS=Rattus norvegicus GN=Sfxn5 PE=2 SV=1	4.33333
SYVC_RAT	140280	156		469	1.282	0.780031	1.56705	0.638144	1.073	4	SYVC_RAT	199	0	329	140280	1.187	0.84246	1.76821	0.565543	1.141	4	SYVC_RAT	119	1	626	140280	1.076	0.929368	2.03749	0.490799	1.054	3	Valine--tRNA ligase OS=Rattus norvegicus GN=Vars PE=2 SV=2	3.66667
SYNPO_RAT	99924	157		465	0.8064	1.24008	0.985699	1.01451	1.111	11	SYNPO_RAT	172	0	380	99924	0.6691	1.49454	0.996723	1.00329	1.13	7	SYNPO_RAT	190	0	439	99924	0.618	1.61812	1.17023	0.854531	1.122	9	Synaptopodin OS=Rattus norvegicus GN=Synpo PE=1 SV=2	9
GHC2_RAT	34148	158		462	0.2466	4.05515	0.30143	3.31752	1.281	6	GHC2_RAT	209	0	315	34148	0.226	4.42478	0.33666	2.97035	1.175	4	GHC2_RAT	246	0	323	34148	0.1358	7.36377	0.257148	3.88881	2.559	3	Mitochondrial glutamate carrier 2 OS=Rattus norvegicus GN=Slc25a18 PE=2 SV=2	4.33333
LONP2_RAT	94334	159		454	0.3967	2.5208	0.484904	2.06226	1.235	4	LONP2_RAT	180	0	360	94334	0.3263	3.06466	0.486072	2.05731	1.352	4	LONP2_RAT	175	0	463	94334	0.2643	3.78358	0.500473	1.99811	1.24	4	Lon protease homolog 2, peroxisomal OS=Rattus norvegicus GN=Lonp2 PE=1 SV=2	4
DPYL4_RAT	61047	30	4	450	0.1243	8.04505	0.151937	6.58166	1.737	4	#N/A	#N/A	#N/A	#N/A	#N/A	#N/A	#N/A	#N/A	#N/A	#N/A	#N/A	#N/A	#N/A	#N/A	#N/A	#N/A	#N/A	#N/A	#N/A	#N/A	#N/A	#N/A	Dihydropyrimidinase-related protein 4 (Fragment) OS=Rattus norvegicus GN=Dpysl4 PE=1 SV=1	#N/A
DYN2_RAT	98169	91	2	449	1.018	0.982318	1.24435	0.803635	1.168	5	DYN2_RAT	116	2	278	98169	0.7047	1.41904	1.04975	0.952604	1.075	5	DYN2_RAT	94	3	336	98169	0.6463	1.54727	1.22382	0.817113	1.036	4	Dynamin-2 OS=Rattus norvegicus GN=Dnm2 PE=1 SV=1	4.66667
NUMBL_RAT	65472	161	1	442	0.6185	1.61681	0.75602	1.32272	1.113	5	NUMBL_RAT	169	1	390	65472	0.5373	1.86116	0.800387	1.2494	1.114	3	NUMBL_RAT	191	1	438	65472	0.5073	1.97122	0.960614	1.041	1.059	4	Numb-like protein OS=Rattus norvegicus GN=Numbl PE=1 SV=1	4
RS9_RAT	22578	162		441	1.23	0.813008	1.50348	0.665122	1.096	12	RS9_RAT	96	0	663	22578	0.9313	1.07377	1.38731	0.72082	1.072	14	RS9_RAT	144	0	565	22578	0.5074	1.97083	0.960803	1.0408	1.125	15	40S ribosomal protein S9 OS=Rattus norvegicus GN=Rps9 PE=1 SV=4	13.6667
AP180_RAT	93460	163	1	438	1.041	0.960615	1.27246	0.785879	1.068	4	AP180_RAT	176	1	365	93460	0.9292	1.07619	1.38418	0.722449	1.101	4	AP180_RAT	182	1	445	93460	0.5648	1.77054	1.06949	0.935021	1.188	4	Clathrin coat assembly protein AP180 OS=Rattus norvegicus GN=Snap91 PE=1 SV=1	4
PYGM_RAT	97212	164	1	437	0.8458	1.18231	1.03386	0.96725	1.046	8	PYGM_RAT	119	1	552	97212	0.6979	1.43287	1.03962	0.961886	1.084	6	PYGM_RAT	122	1	616	97212	0.6698	1.49298	1.26832	0.788444	1.056	7	Glycogen phosphorylase, muscle form OS=Rattus norvegicus GN=Pygm PE=1 SV=5	7
MPCP_RAT	39419	166		434	0.3182	3.14268	0.38895	2.57102	1.287	6	MPCP_RAT	195	0	336	39419	0.2608	3.83436	0.3885	2.574	1.253	5	MPCP_RAT	272	0	288	39419	0.1377	7.26216	0.260746	3.83515	1.187	5	Phosphate carrier protein, mitochondrial OS=Rattus norvegicus GN=Slc25a3 PE=1 SV=1	5.33333
DNM1L_RAT	83856	165		434	0.7554	1.3238	0.923359	1.083	1.173	4	DNM1L_RAT	145	0	473	83856	0.7705	1.29786	1.14777	0.871252	1.337	3	DNM1L_RAT	245	0	323	83856	0.5174	1.93274	0.979739	1.02068	1.168	2	Dynamin-1-like protein OS=Rattus norvegicus GN=Dnm1l PE=1 SV=1	3
SI1L1_RAT	201799	169		427	0.6563	1.52369	0.802225	1.24653	1.182	3	#N/A	#N/A	#N/A	#N/A	#N/A	#N/A	#N/A	#N/A	#N/A	#N/A	#N/A	#N/A	#N/A	#N/A	#N/A	#N/A	#N/A	#N/A	#N/A	#N/A	#N/A	#N/A	Signal-induced proliferation-associated 1-like protein 1 OS=Rattus norvegicus GN=Sipa1l1 PE=1 SV=1	#N/A
DREB_RAT	77424	170		425	0.9559	1.04613	1.16844	0.855843	1.365	4	DREB_RAT	225	0	301	77424	0.9295	1.07585	1.38463	0.722216	1.046	4	DREB_RAT	346	0	200	77424	0.6678	1.49745	1.26453	0.790806	1.412	3	Drebrin OS=Rattus norvegicus GN=Dbn1 PE=1 SV=3	3.66667
STAU2_RAT	62642	171		424	0.447	2.23714	0.546388	1.8302	1.038	3	STAU2_RAT	179	0	362	62642	0.3656	2.73523	0.544615	1.83616	1.282	3	STAU2_RAT	186	0	441	62642	0.4742	2.10881	0.897936	1.11367	1.105	5	Double-stranded RNA-binding protein Staufen homolog 2 OS=Rattus norvegicus GN=Stau2 PE=1 SV=1	3.66667
HBS1L_RAT	74727	172		423	1.33	0.75188	1.62572	0.615113	1.202	5	HBS1L_RAT	178	0	363	74727	0.8908	1.12259	1.32698	0.753592	1.199	6	HBS1L_RAT	213	0	385	74727	0.2541	3.93546	0.481159	2.07832	2.589	3	HBS1-like protein OS=Rattus norvegicus GN=Hbs1l PE=1 SV=1	4.66667
ATAD3_RAT	66718	174		420	0.2809	3.55999	0.343357	2.91242	1.094	6	ATAD3_RAT	291	0	225	66718	0.2295	4.3573	0.341874	2.92505	1.116	3	ATAD3_RAT	210	0	391	66718	0.2176	4.59559	0.412043	2.42693	1.103	5	ATPase family AAA domain-containing protein 3 OS=Rattus norvegicus GN=Atad3 PE=1 SV=1	4.66667
HXK1_RAT	102342	175	1	418	1.38	0.724638	1.68684	0.592826	1.035	2	HXK1_RAT	228	0	297	102342	0.8036	1.2444	1.19708	0.835366	1.325	3	HXK1_RAT	158	0	508	102342	0.3529	2.83366	0.668245	1.49646	1.296	3	Hexokinase-1 OS=Rattus norvegicus GN=Hk1 PE=1 SV=4	2.66667
MK01_RAT	41249	177		416	0.5533	1.80734	0.676323	1.47858	1.145	7	MK01_RAT	141	1	487	41249	0.4109	2.43368	0.612096	1.63373	1.047	7	MK01_RAT	177	0	456	41249	0.3624	2.75938	0.686234	1.45723	1.093	8	Mitogen-activated protein kinase 1 OS=Rattus norvegicus GN=Mapk1 PE=1 SV=3	7.33333
GLRX3_RAT	37825	178		416	0.9558	1.04624	1.16832	0.855932	1.061	8	GLRX3_RAT	125	0	537	37825	0.749	1.33511	1.11575	0.896262	1.074	10	GLRX3_RAT	183	0	445	37825	0.5389	1.85563	1.02045	0.979959	1.098	7	Glutaredoxin-3 OS=Rattus norvegicus GN=Glrx3 PE=1 SV=2	8.33333
JKIP1_RAT	73062	179	1	414	1.14	0.877193	1.39347	0.717632	1.106	4	#N/A	#N/A	#N/A	#N/A	#N/A	#N/A	#N/A	#N/A	#N/A	#N/A	#N/A	#N/A	#N/A	#N/A	#N/A	#N/A	#N/A	#N/A	#N/A	#N/A	#N/A	#N/A	Janus kinase and microtubule-interacting protein 1 OS=Rattus norvegicus GN=Jakmip1 PE=1 SV=1	#N/A
NDUA9_RAT	42532	180		409	0.4337	2.30574	0.530131	1.88633	1.318	2	#N/A	#N/A	#N/A	#N/A	#N/A	#N/A	#N/A	#N/A	#N/A	#N/A	#N/A	#N/A	#N/A	#N/A	#N/A	#N/A	#N/A	#N/A	#N/A	#N/A	#N/A	#N/A	NADH dehydrogenase [ubiquinone] 1 alpha subcomplex subunit 9, mitochondrial OS=Rattus norvegicus GN=Ndufa9 PE=1 SV=2	#N/A
1433E_RAT	29155	95	3	409	0.9159	1.09182	1.11955	0.89322	1.117	5	1433E_RAT	86	3	440	29155	0.6837	1.46263	1.01847	0.981863	1.298	4	1433E_RAT	120	4	460	29155	0.5152	1.94099	0.975573	1.02504	1.486	5	14-3-3 protein epsilon OS=Rattus norvegicus GN=Ywhae PE=1 SV=1	4.66667
PRKRA_RAT	34334	181		409	0.9777	1.02281	1.19509	0.83676	1.227	11	PRKRA_RAT	237	0	288	34334	0.8346	1.19818	1.24326	0.804337	1.203	9	PRKRA_RAT	131	0	599	34334	0.6858	1.45815	1.29862	0.77005	1.255	11	Interferon-inducible double-stranded RNA-dependent protein kinase activator A OS=Rattus norvegicus GN=Prkra PE=1 SV=1	10.3333
SYN2_RAT	63417	183	1	406	0.8778	1.13921	1.07297	0.931989	1.963	2	#N/A	#N/A	#N/A	#N/A	#N/A	#N/A	#N/A	#N/A	#N/A	#N/A	#N/A	SYN2_RAT	108	2	663	63417	0.2842	3.51865	0.538156	1.8582	1.321	3	Synapsin-2 OS=Rattus norvegicus GN=Syn2 PE=1 SV=1	#N/A
VDAC2_RAT	31726	182	1	406	0.8181	1.22234	1	1	1.19	7	VDAC2_RAT	213	1	311	31726	0.5916	1.69033	0.881275	1.13472	1.178	7	VDAC2_RAT	126	1	613	31726	0.6214	1.60927	1.17667	0.849855	1.236	6	Voltage-dependent anion-selective channel protein 2 OS=Rattus norvegicus GN=Vdac2 PE=1 SV=2	6.66667
AT1A4_RAT	113932	10	4	406	0.705	1.41844	0.861753	1.16043	1.07	5	AT1A4_RAT	11	4	485	113932	0.599	1.66945	0.892299	1.1207	1.112	5	#N/A	#N/A	#N/A	#N/A	#N/A	#N/A	#N/A	#N/A	#N/A	#N/A	#N/A	Sodium/potassium-transporting ATPase subunit alpha-4 OS=Rattus norvegicus GN=Atp1a4 PE=2 SV=1	#N/A
EAA1_RAT	59659	184		405	0.3609	2.77085	0.441144	2.26683	1.14	3	#N/A	#N/A	#N/A	#N/A	#N/A	#N/A	#N/A	#N/A	#N/A	#N/A	#N/A	#N/A	#N/A	#N/A	#N/A	#N/A	#N/A	#N/A	#N/A	#N/A	#N/A	#N/A	Excitatory amino acid transporter 1 OS=Rattus norvegicus GN=Slc1a3 PE=1 SV=2	#N/A
SYRC_RAT	75762	185		404	0.8832	1.13225	1.07957	0.926291	1.09	4	SYRC_RAT	201	0	326	75762	0.859	1.16414	1.27961	0.78149	1.072	4	SYRC_RAT	227	0	352	75762	0.8033	1.24486	1.52111	0.657413	1.129	3	Arginine--tRNA ligase, cytoplasmic OS=Rattus norvegicus GN=Rars PE=1 SV=2	3.66667
HMGCL_RAT	34170	186		403	1.005	0.995025	1.22846	0.81403	1.089	10	HMGCL_RAT	210	0	315	34170	0.8534	1.17178	1.27126	0.786618	1.073	8	HMGCL_RAT	154	0	516	34170	0.9387	1.0653	1.7775	0.562587	1.032	6	Hydroxymethylglutaryl-CoA lyase, mitochondrial OS=Rattus norvegicus GN=Hmgcl PE=2 SV=1	8
DLG2_RAT	94875	1	4	398	0.1484	6.73854	0.181396	5.5128	1.431	3	DLG2_RAT	1	4	381	94875	0.06228	16.0565	0.0927752	10.7787	1.877	2	DLG2_RAT	1	4	258	94875	0.126	7.93651	0.238591	4.19127	1.584	2	Disks large homolog 2 OS=Rattus norvegicus GN=Dlg2 PE=1 SV=1	2.33333
PRC2A_RAT	228908	190		398	0.9853	1.01492	1.20438	0.830305	1.01	3	PRC2A_RAT	187	0	349	228908	0.7632	1.31027	1.1369	0.879586	1.162	5	PRC2A_RAT	268	0	290	228908	0.819	1.221	1.55084	0.644811	1.1	3	Protein PRRC2A OS=Rattus norvegicus GN=Prrc2a PE=1 SV=1	3.66667
RL10A_RAT	24816	191		392	1.352	0.739645	1.65261	0.605104	1.152	8	RL10A_RAT	50	0	1008	24816	0.8069	1.23931	1.202	0.831949	1.17	10	RL10A_RAT	80	1	890	24816	0.5372	1.8615	1.01723	0.98306	1.147	9	60S ribosomal protein L10a OS=Rattus norvegicus GN=Rpl10a PE=1 SV=2	9
ACSL3_RAT	80406	192	1	391	0.08695	11.5009	0.106283	9.40886	1.146	2	ACSL3_RAT	192	1	341	80406	0.1216	8.22368	0.181141	5.52056	1.602	3	ACSL3_RAT	194	1	431	80406	0.1606	6.22665	0.304109	3.28829	1.28	3	Long-chain-fatty-acid--CoA ligase 3 OS=Rattus norvegicus GN=Acsl3 PE=1 SV=1	2.66667
LGI1_RAT	63687	194		390	0.1051	9.51475	0.128468	7.78402	1.232	3	LGI1_RAT	207	0	317	63687	0.09984	10.016	0.148726	6.72376	1.328	2	LGI1_RAT	276	0	284	63687	0.1173	8.52515	0.222117	4.50213	1.066	2	Leucine-rich glioma-inactivated protein 1 OS=Rattus norvegicus GN=Lgi1 PE=1 SV=1	2.33333
CPT1A_RAT	88069	193		390	0.7412	1.34916	0.906002	1.10375	1.033	2	CPT1A_RAT	143	1	473	88069	0.4296	2.32775	0.639952	1.56262	1.282	6	CPT1A_RAT	157	0	510	88069	0.4791	2.08725	0.907215	1.10228	1.096	3	Carnitine O-palmitoyltransferase 1, liver isoform OS=Rattus norvegicus GN=Cpt1a PE=1 SV=2	3.66667
KPCB_RAT	76701	179	2	387	0.8732	1.14521	1.06735	0.936899	1.049	2	#N/A	#N/A	#N/A	#N/A	#N/A	#N/A	#N/A	#N/A	#N/A	#N/A	#N/A	KPCB_RAT	284	1	273	76701	0.762	1.31234	1.44291	0.693045	1.164	2	Protein kinase C beta type OS=Rattus norvegicus GN=Prkcb PE=1 SV=3	#N/A
SYN1_RAT	73943	183	2	382	1.354	0.738552	1.65505	0.60421	1.841	2	SYN1_RAT	102	1	653	73943	0.4933	2.02716	0.734843	1.36084	1.384	4	SYN1_RAT	108	1	686	73943	0.2477	4.03714	0.46904	2.13201	1.095	5	Synapsin-1 OS=Rattus norvegicus GN=Syn1 PE=1 SV=3	3.66667
TRIO_RAT	347642	195		382	0.7734	1.29299	0.945361	1.0578	1.149	5	TRIO_RAT	230	0	293	347642	0.5975	1.67364	0.890064	1.12351	1.156	3	TRIO_RAT	248	0	316	347642	0.5915	1.69062	1.12005	0.892815	1.274	3	Triple functional domain protein OS=Rattus norvegicus GN=Trio PE=1 SV=4	3.66667
HS90B_RAT	83229	196	1	373	0.9254	1.08061	1.13116	0.88405	1.277	4	HS90B_RAT	190	1	347	83229	0.8932	1.11957	1.33055	0.751567	1.151	3	HS90B_RAT	103	1	700	83229	0.6255	1.59872	1.18443	0.844285	1.116	5	Heat shock protein HSP 90-beta OS=Rattus norvegicus GN=Hsp90ab1 PE=1 SV=4	4
GRPE1_RAT	24282	197		368	0.676	1.47929	0.826305	1.21021	1.086	10	GRPE1_RAT	120	0	551	24282	0.4707	2.1245	0.701177	1.42617	1.101	11	GRPE1_RAT	96	0	758	24282	0.3682	2.71592	0.697216	1.43427	1.061	11	GrpE protein homolog 1, mitochondrial OS=Rattus norvegicus GN=Grpel1 PE=1 SV=2	10.6667
CAZA2_RAT	32947	198	1	366	0.8657	1.15513	1.05818	0.945016	1.07	8	CAZA2_RAT	280	1	233	32947	0.652	1.53374	0.97125	1.0296	1.13	6	CAZA2_RAT	214	1	385	32947	0.6884	1.45264	1.30354	0.767141	1.044	9	F-actin-capping protein subunit alpha-2 OS=Rattus norvegicus GN=Capza2 PE=1 SV=1	7.66667
KIF1B_RAT	204042	200	1	365	0.9628	1.03864	1.17687	0.849709	1.34	2	#N/A	#N/A	#N/A	#N/A	#N/A	#N/A	#N/A	#N/A	#N/A	#N/A	#N/A	#N/A	#N/A	#N/A	#N/A	#N/A	#N/A	#N/A	#N/A	#N/A	#N/A	#N/A	Kinesin-like protein KIF1B OS=Rattus norvegicus GN=Kif1b PE=1 SV=2	#N/A
BRSK2_RAT	81403	23	2	365	0.3224	3.10174	0.394084	2.53753	1.21	9	BRSK2_RAT	34	2	327	81403	0.3018	3.31345	0.449575	2.22432	1.085	8	BRSK2_RAT	38	2	434	81403	0.2503	3.99521	0.473963	2.10987	1.158	8	Serine/threonine-protein kinase BRSK2 OS=Rattus norvegicus GN=Brsk2 PE=1 SV=1	8.33333
NAC2_RAT	100459	201		361	0.4915	2.03459	0.600782	1.6645	1.099	2	#N/A	#N/A	#N/A	#N/A	#N/A	#N/A	#N/A	#N/A	#N/A	#N/A	#N/A	#N/A	#N/A	#N/A	#N/A	#N/A	#N/A	#N/A	#N/A	#N/A	#N/A	#N/A	Sodium/calcium exchanger 2 OS=Rattus norvegicus GN=Slc8a2 PE=1 SV=1	#N/A
EF2_RAT	95223	202		361	0.689	1.45138	0.842195	1.18737	1.097	5	EF2_RAT	136	0	499	95223	0.2171	4.60617	0.323402	3.09212	1.936	3	EF2_RAT	113	0	664	95223	0.5669	1.76398	1.07347	0.931558	1.107	7	Elongation factor 2 OS=Rattus norvegicus GN=Eef2 PE=1 SV=4	5
GBB1_RAT	37353	203	1	357	0.3699	2.70343	0.452145	2.21168	1.087	5	GBB1_RAT	163	1	423	37353	0.2129	4.69704	0.317146	3.15312	1.225	5	GBB1_RAT	159	1	506	37353	0.4238	2.3596	0.8025	1.24611	1.053	10	Guanine nucleotide-binding protein G(I)/G(S)/G(T) subunit beta-1 OS=Rattus norvegicus GN=Gnb1 PE=1 SV=4	6.66667
HS90A_RAT	84762	196	2	353	1.108	0.902527	1.35436	0.738357	1.193	2	#N/A	#N/A	#N/A	#N/A	#N/A	#N/A	#N/A	#N/A	#N/A	#N/A	#N/A	HS90A_RAT	103	2	390	84762	0.687	1.4556	1.30089	0.768705	1.215	2	Heat shock protein HSP 90-alpha OS=Rattus norvegicus GN=Hsp90aa1 PE=1 SV=3	#N/A
DGKB_RAT	90229	204		353	0.6384	1.56642	0.780345	1.28148	1.024	3	DGKB_RAT	194	0	338	90229	0.7072	1.41403	1.05348	0.949236	1.173	3	DGKB_RAT	253	1	303	90229	0.4855	2.05973	0.919333	1.08774	1.012	2	Diacylglycerol kinase beta OS=Rattus norvegicus GN=Dgkb PE=1 SV=1	2.66667
RL24_RAT	17768	205		346	0.7606	1.31475	0.929715	1.0756	1.089	3	RL24_RAT	130	0	525	17768	0.6663	1.50083	0.992552	1.0075	1.112	4	RL24_RAT	167	0	480	17768	0.5004	1.9984	0.947548	1.05536	1.039	2	60S ribosomal protein L24 OS=Rattus norvegicus GN=Rpl24 PE=2 SV=1	3
BCAS1_RAT	58588	206		342	0.5714	1.75009	0.698448	1.43175	1.086	3	BCAS1_RAT	182	0	357	58588	0.5139	1.9459	0.76553	1.30629	1.122	4	BCAS1_RAT	277	0	283	58588	0.378	2.6455	0.715774	1.39709	1.118	7	Breast carcinoma-amplified sequence 1 homolog (Fragment) OS=Rattus norvegicus GN=Bcas1 PE=1 SV=2	4.66667
SORT_RAT	91111	208		340	0.06644	15.0512	0.0812126	12.3134	1.501	4	SORT_RAT	197	0	332	91111	0.05136	19.4704	0.0765083	13.0705	1.646	4	SORT_RAT	339	0	212	91111	0.05315	18.8147	0.100644	9.93603	1.136	2	Sortilin OS=Rattus norvegicus GN=Sort1 PE=1 SV=3	3.33333
BDH_RAT	38177	209		340	0.4416	2.26449	0.539787	1.85258	1.236	4	BDH_RAT	175	0	368	38177	0.2933	3.40948	0.436913	2.28878	1.238	4	BDH_RAT	307	0	242	38177	0.2495	4.00802	0.472448	2.11663	1.204	3	D-beta-hydroxybutyrate dehydrogenase, mitochondrial OS=Rattus norvegicus GN=Bdh1 PE=1 SV=2	3.66667
VDAC3_RAT	30778	182	2	338	0.6161	1.62311	0.753086	1.32787	1.145	5	VDAC3_RAT	213	2	289	30778	0.6047	1.65371	0.90079	1.11014	1.305	3	VDAC3_RAT	126	2	328	30778	0.5633	1.77525	1.06665	0.937511	1.193	4	Voltage-dependent anion-selective channel protein 3 OS=Rattus norvegicus GN=Vdac3 PE=1 SV=2	4
PP1B_RAT	37163	210	1	336	0.8827	1.13289	1.07896	0.926815	1.053	3	PP1B_RAT	247	1	271	37163	0.6966	1.43554	1.03769	0.963681	1.181	4	PP1B_RAT	170	1	469	37163	0.6296	1.58831	1.1922	0.838787	1.123	4	Serine/threonine-protein phosphatase PP1-beta catalytic subunit OS=Rattus norvegicus GN=Ppp1cb PE=1 SV=3	3.66667
PI51A_RAT	60567	211	1	335	0.4503	2.22074	0.550422	1.81679	1.171	3	#N/A	#N/A	#N/A	#N/A	#N/A	#N/A	#N/A	#N/A	#N/A	#N/A	#N/A	PI51A_RAT	274	1	285	60567	0.4698	2.12857	0.889604	1.1241	1.191	2	Phosphatidylinositol 4-phosphate 5-kinase type-1 alpha OS=Rattus norvegicus GN=Pip5k1a PE=2 SV=1	#N/A
1433G_RAT	28285	95	4	332	0.8301	1.20467	1.01467	0.985544	1.104	5	1433G_RAT	86	4	403	28285	0.6111	1.63639	0.910323	1.09851	1.243	9	1433G_RAT	120	3	479	28285	0.4125	2.42424	0.781102	1.28024	1.606	8	14-3-3 protein gamma OS=Rattus norvegicus GN=Ywhag PE=1 SV=2	7.33333
DYN3_RAT	97853	91	3	329	1.049	0.953289	1.28224	0.779886	1.229	4	#N/A	#N/A	#N/A	#N/A	#N/A	#N/A	#N/A	#N/A	#N/A	#N/A	#N/A	DYN3_RAT	94	2	434	97853	0.6547	1.52742	1.23973	0.806629	1.03	5	Dynamin-3 OS=Rattus norvegicus GN=Dnm3 PE=1 SV=2	#N/A
ATPG_RAT	30172	215		329	0.5058	1.97707	0.618262	1.61744	1.086	4	ATPG_RAT	157	0	437	30172	0.301	3.32226	0.448384	2.23023	1.103	4	ATPG_RAT	201	0	404	30172	0.1731	5.77701	0.327779	3.05084	1.305	6	ATP synthase subunit gamma, mitochondrial OS=Rattus norvegicus GN=Atp5c1 PE=1 SV=2	4.66667
TDRD3_RAT	72983	214		329	1.019	0.981354	1.24557	0.802846	1.108	4	TDRD3_RAT	390	0	141	72983	0.7981	1.25298	1.18889	0.841123	1.165	3	TDRD3_RAT	271	0	289	72983	0.9087	1.10047	1.7207	0.58116	1.084	3	Tudor domain-containing protein 3 OS=Rattus norvegicus GN=Tdrd3 PE=1 SV=1	3.33333
GSTA4_RAT	25493	72	2	329	1.203	0.831255	1.47048	0.68005	1.076	10	GSTA4_RAT	25	4	502	25493	0.8808	1.13533	1.31208	0.762148	1.045	10	GSTA4_RAT	24	2	892	25493	0.6196	1.61394	1.17326	0.852324	1.114	14	Glutathione S-transferase alpha-4 OS=Rattus norvegicus GN=Gsta4 PE=1 SV=2	11.3333
H14_RAT	21974	216		327	1.071	0.933707	1.30913	0.763866	1.152	4	H14_RAT	150	1	457	21974	0.7914	1.26358	1.17891	0.848244	1.102	4	H14_RAT	121	1	618	21974	0.6832	1.4637	1.29369	0.77298	1.188	6	Histone H1.4 OS=Rattus norvegicus GN=Hist1h1e PE=1 SV=3	4.66667
HNRPQ_RAT	59674	217		326	0.8276	1.20831	1.01161	0.988521	1.11	4	HNRPQ_RAT	193	0	340	59674	0.6239	1.60282	0.929391	1.07597	1.15	5	HNRPQ_RAT	247	0	321	59674	0.6067	1.64826	1.14884	0.870447	1.168	4	Heterogeneous nuclear ribonucleoprotein Q OS=Rattus norvegicus GN=Syncrip PE=2 SV=1	4.33333
GSTA6_RAT	25791	72	3	324	1.165	0.858369	1.42403	0.702232	1.094	9	GSTA6_RAT	25	2	578	25791	0.8994	1.11185	1.33979	0.746386	1.043	8	GSTA6_RAT	24	3	824	25791	0.5824	1.71703	1.10282	0.906765	1.114	13	Glutathione S-transferase A6 OS=Rattus norvegicus GN=Gsta6 PE=1 SV=1	10
CSDE1_RAT	88839	219		323	0.8521	1.17357	1.04156	0.960099	1.11	4	CSDE1_RAT	269	0	246	88839	0.8524	1.17316	1.26978	0.787541	1.189	3	CSDE1_RAT	312	0	236	88839	0.8512	1.17481	1.61182	0.620418	1.098	5	Cold shock domain-containing protein E1 OS=Rattus norvegicus GN=Csde1 PE=2 SV=1	4
SGIP1_RAT	88530	221		316	0.7014	1.42572	0.857352	1.16638	1.197	2	SGIP1_RAT	326	0	188	88530	0.6369	1.57011	0.948756	1.05401	1.108	2	#N/A	#N/A	#N/A	#N/A	#N/A	#N/A	#N/A	#N/A	#N/A	#N/A	#N/A	SH3-containing GRB2-like protein 3-interacting protein 1 OS=Rattus norvegicus GN=Sgip1 PE=1 SV=1	#N/A
GTPB1_RAT	72443	225		314	0.5933	1.68549	0.725217	1.3789	1.201	3	GTPB1_RAT	212	0	312	72443	0.4888	2.04583	0.728139	1.37336	1.168	2	GTPB1_RAT	148	0	535	72443	0.6062	1.64962	1.14789	0.871165	1.656	3	GTP-binding protein 1 OS=Rattus norvegicus GN=Gtpbp1 PE=1 SV=1	2.66667
TPIS_RAT	26832	227		313	1.099	0.909918	1.34336	0.744404	1.176	5	TPIS_RAT	140	0	489	26832	0.8204	1.21892	1.22211	0.818259	1.286	7	TPIS_RAT	123	0	616	26832	2.595	0.385356	4.91384	0.203507	3.337	8	Triosephosphate isomerase OS=Rattus norvegicus GN=Tpi1 PE=1 SV=2	6.66667
IMPCT_RAT	35972	228		311	0.586	1.70648	0.716294	1.39608	1.351	3	IMPCT_RAT	273	0	239	35972	0.4502	2.22124	0.670639	1.49112	1.115	4	#N/A	#N/A	#N/A	#N/A	#N/A	#N/A	#N/A	#N/A	#N/A	#N/A	#N/A	Protein IMPACT OS=Rattus norvegicus GN=Impact PE=1 SV=1	#N/A
ABCF1_RAT	95193	229		310	1.201	0.832639	1.46804	0.681182	1.157	2	ABCF1_RAT	312	0	203	95193	0.8877	1.12651	1.32236	0.756224	1.096	4	#N/A	#N/A	#N/A	#N/A	#N/A	#N/A	#N/A	#N/A	#N/A	#N/A	#N/A	ATP-binding cassette sub-family F member 1 OS=Rattus norvegicus GN=Abcf1 PE=1 SV=1	#N/A
RL13A_RAT	23461	230		309	1.324	0.755287	1.61838	0.6179	1.177	6	RL13A_RAT	107	0	626	23461	0.9429	1.06056	1.40459	0.711952	1.292	7	RL13A_RAT	124	0	615	23461	0.4458	2.24316	0.844158	1.18461	1.269	6	60S ribosomal protein L13a OS=Rattus norvegicus GN=Rpl13a PE=1 SV=2	6.33333
SNP25_RAT	23300	232		308	0.553	1.80832	0.675956	1.47939	1.164	4	SNP25_RAT	155	0	448	23300	0.4615	2.16685	0.687472	1.4546	1.121	6	SNP25_RAT	261	0	294	23300	0.3643	2.74499	0.689831	1.44963	1.201	4	Synaptosomal-associated protein 25 OS=Rattus norvegicus GN=Snap25 PE=1 SV=1	4.66667
ALDOA_RAT	39327	231		308	0.6788	1.47319	0.829727	1.20522	1.142	3	ALDOA_RAT	166	1	405	39327	0.8557	1.16863	1.27469	0.784504	1.196	3	ALDOA_RAT	233	1	349	39327	0.4786	2.08943	0.906268	1.10343	1.012	3	Fructose-bisphosphate aldolase A OS=Rattus norvegicus GN=Aldoa PE=1 SV=2	3
AAKB2_RAT	30208	233	1	307	0.01087	91.9963	0.0132869	75.2622	6.833	3	AAKB2_RAT	181	1	359	30208	0.03088	32.3834	0.0460003	21.739	5.212	4	AAKB2_RAT	353	1	197	30208	0.05005	19.98	0.0947737	10.5514	5.381	3	5'-AMP-activated protein kinase subunit beta-2 OS=Rattus norvegicus GN=Prkab2 PE=1 SV=1	3.33333
DDX21_RAT	85913	234		306	1.191	0.839631	1.45581	0.686902	1.145	3	DDX21_RAT	287	0	230	85913	0.7644	1.30822	1.13869	0.878205	1.042	2	#N/A	#N/A	#N/A	#N/A	#N/A	#N/A	#N/A	#N/A	#N/A	#N/A	#N/A	Nucleolar RNA helicase 2 OS=Rattus norvegicus GN=Ddx21 PE=2 SV=1	#N/A
CAPZB_RAT	30609	235		305	0.8419	1.18779	1.02909	0.971731	1.123	6	CAPZB_RAT	277	0	235	30609	0.6191	1.61525	0.92224	1.08432	1.107	4	CAPZB_RAT	244	0	328	30609	0.7125	1.40351	1.34918	0.741193	1.085	6	F-actin-capping protein subunit beta OS=Rattus norvegicus GN=Capzb PE=1 SV=1	5.33333
AAPK2_RAT	62218	140	2	299	0.04902	20.3998	0.0599193	16.6891	2.071	4	#N/A	#N/A	#N/A	#N/A	#N/A	#N/A	#N/A	#N/A	#N/A	#N/A	#N/A	#N/A	#N/A	#N/A	#N/A	#N/A	#N/A	#N/A	#N/A	#N/A	#N/A	#N/A	5'-AMP-activated protein kinase catalytic subunit alpha-2 OS=Rattus norvegicus GN=Prkaa2 PE=1 SV=1	#N/A
RL15_RAT	24131	239		299	1.481	0.675219	1.81029	0.552397	1.208	9	RL15_RAT	142	0	477	24131	1.016	0.984252	1.51348	0.660728	1.197	11	RL15_RAT	221	0	372	24131	0.5617	1.78031	1.06362	0.940182	1.234	6	60S ribosomal protein L15 OS=Rattus norvegicus GN=Rpl15 PE=1 SV=2	8.66667
GNAI1_RAT	40319	117	2	296	0.461	2.1692	0.563501	1.77462	1.136	2	GNAI1_RAT	64	3	324	40319	0.3668	2.72628	0.546403	1.83015	1.025	2	GNAI1_RAT	93	2	536	40319	0.2663	3.75516	0.504261	1.9831	1.341	5	Guanine nucleotide-binding protein G(i) subunit alpha-1 OS=Rattus norvegicus GN=Gnai1 PE=1 SV=3	3
GEPH_RAT	83213	240		296	0.9073	1.10217	1.10903	0.901686	1.382	2	GEPH_RAT	234	0	290	83213	0.7518	1.33014	1.11992	0.892924	1.284	2	#N/A	#N/A	#N/A	#N/A	#N/A	#N/A	#N/A	#N/A	#N/A	#N/A	#N/A	Gephyrin OS=Rattus norvegicus GN=Gphn PE=1 SV=3	#N/A
EIF3D_RAT	63948	241		295	1.172	0.853242	1.43259	0.698038	1.143	4	EIF3D_RAT	223	0	301	63948	0.9494	1.0533	1.41427	0.707078	1.301	3	EIF3D_RAT	287	0	269	63948	0.6402	1.56201	1.21227	0.824898	1.033	3	Eukaryotic translation initiation factor 3 subunit D OS=Rattus norvegicus GN=Eif3d PE=1 SV=1	3.33333
PRPS1_RAT	34812	243		294	0.6079	1.64501	0.743063	1.34578	1.092	5	PRPS1_RAT	196	0	333	34812	0.4379	2.28363	0.652316	1.533	1.102	2	PRPS1_RAT	306	0	246	34812	0.4763	2.09952	0.901913	1.10875	1.171	2	Ribose-phosphate pyrophosphokinase 1 OS=Rattus norvegicus GN=Prps1 PE=1 SV=2	3
DGKZ_RAT	103943	244		292	0.7485	1.33601	0.914925	1.09299	1.178	3	DGKZ_RAT	321	0	193	103943	0.7855	1.27307	1.17012	0.854615	1.045	3	DGKZ_RAT	319	0	232	103943	0.6007	1.66472	1.13747	0.879141	1.139	4	Diacylglycerol kinase zeta OS=Rattus norvegicus GN=Dgkz PE=1 SV=1	3.33333
PYGB_RAT	96113	164	2	289	0.9438	1.05955	1.15365	0.866815	1.029	4	PYGB_RAT	119	2	375	96113	0.6901	1.44907	1.02801	0.972758	1.075	8	PYGB_RAT	122	2	247	96113	0.7183	1.39218	1.36016	0.735208	1.063	8	Glycogen phosphorylase, brain form (Fragment) OS=Rattus norvegicus GN=Pygb PE=1 SV=3	6.66667
RL10_RAT	24588	248		287	1.353	0.739098	1.65383	0.604656	1.066	6	RL10_RAT	121	0	551	24588	0.9936	1.00644	1.48011	0.675624	1.065	6	RL10_RAT	134	0	583	24588	0.525	1.90476	0.99413	1.0059	1.144	7	60S ribosomal protein L10 OS=Rattus norvegicus GN=Rpl10 PE=1 SV=3	6.33333
UCRI_RAT	29427	251		283	0.4787	2.08899	0.585136	1.709	1.316	3	UCRI_RAT	337	0	183	29427	0.2963	3.37496	0.441382	2.26561	1.747	2	UCRI_RAT	232	0	349	29427	0.2398	4.17014	0.454081	2.20225	1.866	2	Cytochrome b-c1 complex subunit Rieske, mitochondrial OS=Rattus norvegicus GN=Uqcrfs1 PE=1 SV=2	2.33333
ACLY_RAT	120559	253		282	1.051	0.951475	1.28468	0.778402	1.294	2	ACLY_RAT	251	0	265	120559	0.7939	1.2596	1.18263	0.845572	1.126	4	ACLY_RAT	238	0	339	120559	0.4428	2.25836	0.838478	1.19264	1.179	4	ATP-citrate synthase OS=Rattus norvegicus GN=Acly PE=1 SV=1	3.33333
RL21_RAT	18454	254		280	0.6922	1.44467	0.846107	1.18188	1.092	2	RL21_RAT	258	0	259	18454	0.6701	1.49231	0.998212	1.00179	1.031	3	RL21_RAT	378	0	180	18454	0.4108	2.43427	0.777883	1.28554	1.092	4	60S ribosomal protein L21 OS=Rattus norvegicus GN=Rpl21 PE=1 SV=3	3
AMPH_RAT	74832	259	1	276	0.8407	1.18948	1.02762	0.973118	1.041	5	AMPH_RAT	284	0	232	74832	0.6921	1.44488	1.03098	0.969947	1.047	7	AMPH_RAT	225	2	251	74832	0.6511	1.53586	1.23291	0.811089	1.1	5	Amphiphysin OS=Rattus norvegicus GN=Amph PE=1 SV=1	5.66667
ROGDI_RAT	32185	261		275	0.6223	1.60694	0.760665	1.31464	1.097	5	ROGDI_RAT	240	0	280	32185	0.6229	1.60539	0.927901	1.0777	1.019	3	ROGDI_RAT	250	0	305	32185	0.5184	1.92901	0.981632	1.01871	1.085	3	Protein rogdi homolog OS=Rattus norvegicus GN=Rogdi PE=2 SV=1	3.66667
SRC8_RAT	56907	264		272	0.9957	1.00432	1.21709	0.821633	1.122	4	SRC8_RAT	164	0	422	56907	0.8541	1.17082	1.27231	0.785974	1.085	6	SRC8_RAT	181	0	446	56907	0.7949	1.25802	1.50521	0.66436	1.049	8	Src substrate cortactin OS=Rattus norvegicus GN=Cttn PE=1 SV=1	6
PADI2_RAT	75308	263		272	1.362	0.734214	1.66483	0.600661	1.303	3	PADI2_RAT	440	0	113	75308	0.9334	1.07135	1.39044	0.719199	1.26	2	#N/A	#N/A	#N/A	#N/A	#N/A	#N/A	#N/A	#N/A	#N/A	#N/A	#N/A	Protein-arginine deiminase type-2 OS=Rattus norvegicus GN=Padi2 PE=1 SV=1	#N/A
RL17_RAT	21383	265		268	1.15	0.869565	1.4057	0.711391	1.101	5	RL17_RAT	248	0	270	21383	0.9773	1.02323	1.45583	0.686892	1.051	6	RL17_RAT	236	0	341	21383	0.5045	1.98216	0.955311	1.04678	1.127	6	60S ribosomal protein L17 OS=Rattus norvegicus GN=Rpl17 PE=2 SV=3	5.66667
LYSM1_RAT	24863	267		261	0.6645	1.50489	0.812248	1.23115	1.122	4	LYSM1_RAT	198	0	330	24863	0.3544	2.82167	0.527931	1.89419	1.595	4	LYSM1_RAT	278	0	282	24863	0.1537	6.50618	0.291043	3.43591	1.309	6	LysM and putative peptidoglycan-binding domain-containing protein 1 OS=Rattus norvegicus GN=Lysmd1 PE=1 SV=1	4.66667
GNAI2_RAT	40473	117	4	259	0.5892	1.69722	0.720205	1.38849	1.06	2	GNAI2_RAT	64	2	356	40473	0.3962	2.52398	0.590198	1.69435	1.113	2	GNAI2_RAT	93	3	367	40473	0.2663	3.75516	0.504261	1.9831	1.419	4	Guanine nucleotide-binding protein G(i) subunit alpha-2 OS=Rattus norvegicus GN=Gnai2 PE=1 SV=3	2.66667
ARM10_RAT	33401	272		255	0.1179	8.48176	0.144114	6.93893	1.181	2	ARM10_RAT	206	0	319	33401	0.09221	10.8448	0.13736	7.28012	1.793	2	ARM10_RAT	296	0	257	33401	0.06608	15.1332	0.125128	7.99183	1.28	3	Armadillo repeat-containing protein 10 OS=Rattus norvegicus GN=Armc10 PE=1 SV=1	2.33333
HSDL1_RAT	36884	275	1	254	0.2532	3.94945	0.309498	3.23104	1.054	2	#N/A	#N/A	#N/A	#N/A	#N/A	#N/A	#N/A	#N/A	#N/A	#N/A	#N/A	HSDL1_RAT	520	0	107	36884	0.241	4.14938	0.456353	2.19129	1.071	2	Inactive hydroxysteroid dehydrogenase-like protein 1 OS=Rattus norvegicus GN=Hsdl1 PE=2 SV=1	#N/A
LETM1_RAT	83008	274		254	0.7264	1.37665	0.887911	1.12624	1.483	3	LETM1_RAT	340	0	180	83008	0.6131	1.63106	0.913303	1.09493	1.185	2	LETM1_RAT	297	0	257	83008	0.663	1.5083	1.25544	0.796531	1.058	3	LETM1 and EF-hand domain-containing protein 1, mitochondrial OS=Rattus norvegicus GN=Letm1 PE=1 SV=1	2.66667
PAK5_RAT	80898	277		251	0.8774	1.13973	1.07249	0.932414	1.001	2	#N/A	#N/A	#N/A	#N/A	#N/A	#N/A	#N/A	#N/A	#N/A	#N/A	#N/A	PAK5_RAT	217	0	381	80898	0.625	1.6	1.18349	0.84496	1.132	4	Serine/threonine-protein kinase PAK 5 OS=Rattus norvegicus GN=Pak5 PE=1 SV=1	#N/A
PP1A_RAT	37488	210	2	249	0.8589	1.16428	1.04987	0.952497	1.059	3	PP1A_RAT	247	2	165	37488	0.7056	1.41723	1.05109	0.951389	1.207	2	PP1A_RAT	170	2	425	37488	0.7037	1.42106	1.33251	0.750462	1.187	3	Serine/threonine-protein phosphatase PP1-alpha catalytic subunit OS=Rattus norvegicus GN=Ppp1ca PE=1 SV=1	2.66667
TAU_RAT	78516	278		248	0.6077	1.64555	0.742819	1.34622	1.273	3	TAU_RAT	301	0	218	78516	0.4831	2.06996	0.719648	1.38957	1.13	4	TAU_RAT	254	0	303	78516	0.3449	2.89939	0.653096	1.53117	1.068	3	Microtubule-associated protein tau OS=Rattus norvegicus GN=Mapt PE=1 SV=3	3.33333
SPS2L_RAT	61736	279		247	1.05	0.952381	1.28346	0.779143	1.262	4	SPS2L_RAT	304	0	212	61736	0.7198	1.38927	1.07225	0.93262	1.244	2	SPS2L_RAT	266	0	290	61736	0.7304	1.36911	1.38307	0.723028	1.032	2	SPATS2-like protein OS=Rattus norvegicus GN=Spats2l PE=2 SV=1	2.66667
ELAV1_RAT	36146	280		247	0.9656	1.03563	1.1803	0.847245	1.066	5	ELAV1_RAT	309	0	210	36146	0.7817	1.27926	1.16446	0.858769	1.13	4	ELAV1_RAT	160	0	505	36146	0.7657	1.30599	1.44991	0.689696	1.134	5	ELAV-like protein 1 OS=Rattus norvegicus GN=Elavl1 PE=1 SV=1	4.66667
MATR3_RAT	94389	281		246	1.499	0.667111	1.83229	0.545764	1.188	4	#N/A	#N/A	#N/A	#N/A	#N/A	#N/A	#N/A	#N/A	#N/A	#N/A	#N/A	MATR3_RAT	445	0	146	94389	0.5176	1.93199	0.980117	1.02029	1.379	2	Matrin-3 OS=Rattus norvegicus GN=Matr3 PE=1 SV=2	#N/A
TECR_RAT	36099	282		246	0.2699	3.70508	0.329911	3.03112	1.308	3	TECR_RAT	246	0	271	36099	0.2345	4.26439	0.349322	2.86269	1.235	5	TECR_RAT	328	0	221	36099	0.3133	3.19183	0.593259	1.6856	1.487	5	Very-long-chain enoyl-CoA reductase OS=Rattus norvegicus GN=Tecr PE=1 SV=1	4.33333
CSKP_RAT	103193	283		243	0.03795	26.3505	0.046388	21.5573	1.206	2	CSKP_RAT	504	0	91	103193	0.09712	10.2965	0.144675	6.91207	3.158	2	#N/A	#N/A	#N/A	#N/A	#N/A	#N/A	#N/A	#N/A	#N/A	#N/A	#N/A	Peripheral plasma membrane protein CASK OS=Rattus norvegicus GN=Cask PE=1 SV=1	#N/A
G3PT_RAT	46678	18	2	235	0.2401	4.16493	0.293485	3.40733	2.034	3	#N/A	#N/A	#N/A	#N/A	#N/A	#N/A	#N/A	#N/A	#N/A	#N/A	#N/A	G3PT_RAT	18	2	266	46678	0.2369	4.22119	0.448589	2.22921	3.026	2	Glyceraldehyde-3-phosphate dehydrogenase, testis-specific OS=Rattus norvegicus GN=Gapdhs PE=1 SV=1	#N/A
1433B_RAT	28037	95	5	235	0.6814	1.46757	0.832906	1.20062	1.154	5	1433B_RAT	86	5	350	28037	0.3995	2.50313	0.595114	1.68035	1.238	7	1433B_RAT	120	6	262	28037	0.2571	3.88954	0.48684	2.05406	2.513	6	14-3-3 protein beta/alpha OS=Rattus norvegicus GN=Ywhab PE=1 SV=3	6
SMBP2_RAT	108373	292		235	1.092	0.915751	1.3348	0.749176	1.064	5	SMBP2_RAT	263	0	255	108373	0.864	1.15741	1.28705	0.776968	1.03	4	SMBP2_RAT	204	0	401	108373	0.5457	1.83251	1.03333	0.967748	1.045	4	DNA-binding protein SMUBP-2 OS=Rattus norvegicus GN=Ighmbp2 PE=1 SV=1	4.33333
ODPB_RAT	38957	295		231	2.369	0.422119	2.89573	0.345336	2.405	3	#N/A	#N/A	#N/A	#N/A	#N/A	#N/A	#N/A	#N/A	#N/A	#N/A	#N/A	ODPB_RAT	260	0	295	38957	0.1432	6.98324	0.271161	3.68785	1.186	2	Pyruvate dehydrogenase E1 component subunit beta, mitochondrial OS=Rattus norvegicus GN=Pdhb PE=1 SV=2	#N/A
CAMKV_RAT	54072	298		230	1.278	0.782473	1.56216	0.640141	1.1	6	CAMKV_RAT	285	0	231	54072	1.245	0.803213	1.85461	0.539197	1.102	4	CAMKV_RAT	198	0	409	54072	0.988	1.01215	1.87086	0.534514	1.106	8	CaM kinase-like vesicle-associated protein OS=Rattus norvegicus GN=Camkv PE=1 SV=1	6
RS27A_RAT	17939	299		229	1.072	0.932836	1.31035	0.763153	1.2	2	RS27A_RAT	236	0	288	17939	0.8189	1.22115	1.21987	0.819758	1.281	2	RS27A_RAT	188	0	440	17939	0.4586	2.18055	0.868396	1.15155	1.049	2	Ubiquitin-40S ribosomal protein S27a OS=Rattus norvegicus GN=Rps27a PE=1 SV=2	2
CAZA1_RAT	32889	198	2	228	0.8391	1.19175	1.02567	0.974973	1.116	5	CAZA1_RAT	280	2	224	32889	0.6933	1.44238	1.03277	0.968268	1.055	4	CAZA1_RAT	214	2	361	32889	0.7483	1.33636	1.41697	0.705733	1.102	6	F-actin-capping protein subunit alpha-1 OS=Rattus norvegicus GN=Capza1 PE=1 SV=1	5
DPYL5_RAT	61501	30	5	227	0.1249	8.00641	0.152671	6.55004	2.024	3	DPYL5_RAT	436	0	115	61501	0.03704	26.9978	0.0551765	18.1237	1.317	2	DPYL5_RAT	35	3	259	61501	0.05786	17.2831	0.109563	9.1272	5.13	3	Dihydropyrimidinase-related protein 5 OS=Rattus norvegicus GN=Dpysl5 PE=1 SV=1	2.66667
1433F_RAT	28194	95	6	227	0.8427	1.18666	1.03007	0.970808	1.115	5	1433F_RAT	86	6	343	28194	0.5243	1.9073	0.781022	1.28037	1.176	6	1433F_RAT	120	5	296	28194	0.6583	1.51906	1.24654	0.802218	1.558	6	14-3-3 protein eta OS=Rattus norvegicus GN=Ywhah PE=1 SV=2	5.66667
DDB1_RAT	126781	301		226	1.064	0.93985	1.30057	0.768891	1.081	4	DDB1_RAT	348	0	167	126781	0.8852	1.12969	1.31864	0.75836	1.123	5	DDB1_RAT	441	0	148	126781	0.6302	1.5868	1.19333	0.837988	1.246	2	DNA damage-binding protein 1 OS=Rattus norvegicus GN=Ddb1 PE=1 SV=1	3.66667
TRAP1_RAT	80411	196	3	225	0.8946	1.11782	1.09351	0.914487	1.256	3	#N/A	#N/A	#N/A	#N/A	#N/A	#N/A	#N/A	#N/A	#N/A	#N/A	#N/A	#N/A	#N/A	#N/A	#N/A	#N/A	#N/A	#N/A	#N/A	#N/A	#N/A	#N/A	Heat shock protein 75 kDa, mitochondrial OS=Rattus norvegicus GN=Trap1 PE=1 SV=1	#N/A
BIN1_RAT	64493	259	2	225	0.9475	1.05541	1.15817	0.86343	1.154	3	BIN1_RAT	185	0	353	64493	0.7206	1.38773	1.07344	0.931585	1.076	2	BIN1_RAT	225	1	358	64493	0.6252	1.59949	1.18387	0.84469	1.027	5	Myc box-dependent-interacting protein 1 OS=Rattus norvegicus GN=Bin1 PE=1 SV=1	3.33333
SEPT9_RAT	63752	302		223	0.56	1.78571	0.684513	1.46089	1.305	2	#N/A	#N/A	#N/A	#N/A	#N/A	#N/A	#N/A	#N/A	#N/A	#N/A	#N/A	#N/A	#N/A	#N/A	#N/A	#N/A	#N/A	#N/A	#N/A	#N/A	#N/A	#N/A	Septin-9 OS=Rattus norvegicus GN=Sept9 PE=1 SV=1	#N/A
ROA3_RAT	39628	304		219	1.012	0.988142	1.23701	0.808399	1.068	5	ROA3_RAT	226	0	301	39628	0.7428	1.34626	1.10651	0.903743	1.067	6	ROA3_RAT	162	1	486	39628	0.539	1.85529	1.02064	0.979777	1.321	10	Heterogeneous nuclear ribonucleoprotein A3 OS=Rattus norvegicus GN=Hnrnpa3 PE=1 SV=1	7
GIT1_RAT	85178	305		217	0.7112	1.40607	0.869331	1.15031	1.045	5	GIT1_RAT	216	0	310	85178	0.6341	1.57704	0.944585	1.05867	1.069	6	GIT1_RAT	349	0	198	85178	0.4684	2.13493	0.886953	1.12746	1.143	2	ARF GTPase-activating protein GIT1 OS=Rattus norvegicus GN=Git1 PE=1 SV=1	4.33333
NEDD4_RAT	102331	307		214	0.6787	1.47341	0.829605	1.20539	1.04	2	#N/A	#N/A	#N/A	#N/A	#N/A	#N/A	#N/A	#N/A	#N/A	#N/A	#N/A	NEDD4_RAT	293	0	262	102331	0.4737	2.11104	0.896989	1.11484	1.045	2	E3 ubiquitin-protein ligase NEDD4 OS=Rattus norvegicus GN=Nedd4 PE=1 SV=1	#N/A
CTND2_RAT	28910	306		214	1.113	0.898473	1.36047	0.73504	1.062	3	CTND2_RAT	411	0	126	28910	0.7108	1.40687	1.05884	0.944429	1.307	2	CTND2_RAT	301	0	252	28910	0.7455	1.34138	1.41166	0.708384	1.284	3	Catenin delta-2 (Fragment) OS=Rattus norvegicus GN=Ctnnd2 PE=1 SV=1	2.66667
MYPR_RAT	30057	308		213	0.6118	1.63452	0.74783	1.3372	1.102	3	MYPR_RAT	300	0	219	30057	0.5046	1.98177	0.751676	1.33036	1.068	3	MYPR_RAT	324	0	226	30057	0.3943	2.53614	0.746639	1.33934	1.254	2	Myelin proteolipid protein OS=Rattus norvegicus GN=Plp1 PE=1 SV=2	2.66667
GLO2_RAT	34088	312		212	0.9376	1.06655	1.14607	0.872547	1.121	5	GLO2_RAT	255	0	262	34088	3.119	0.320616	4.64621	0.215229	1.621	6	GLO2_RAT	401	0	165	34088	0.7198	1.38927	1.363	0.733676	1.063	4	Hydroxyacylglutathione hydrolase, mitochondrial OS=Rattus norvegicus GN=Hagh PE=1 SV=2	5
EXOC4_RAT	110483	316		208	1.19	0.840336	1.45459	0.687479	1.031	2	#N/A	#N/A	#N/A	#N/A	#N/A	#N/A	#N/A	#N/A	#N/A	#N/A	#N/A	#N/A	#N/A	#N/A	#N/A	#N/A	#N/A	#N/A	#N/A	#N/A	#N/A	#N/A	Exocyst complex component 4 OS=Rattus norvegicus GN=Exoc4 PE=1 SV=1	#N/A
DCX_RAT	40534	24	3	207	0.4385	2.2805	0.535998	1.86568	1.183	2	DCX_RAT	16	3	310	40534	0.2141	4.67071	0.318933	3.13545	1.347	3	DCX_RAT	23	3	237	40534	0.2554	3.91543	0.483621	2.06774	1.445	2	Neuronal migration protein doublecortin OS=Rattus norvegicus GN=Dcx PE=1 SV=2	2.33333
ODP2_RAT	67123	319		206	0.8018	1.24719	0.980076	1.02033	1.223	2	ODP2_RAT	274	0	237	67123	0.5509	1.81521	0.820647	1.21855	1.183	2	ODP2_RAT	257	0	300	67123	0.546	1.8315	1.0339	0.967216	1.242	2	Dihydrolipoyllysine-residue acetyltransferase component of pyruvate dehydrogenase complex, mitochondrial OS=Rattus norvegicus GN=Dlat PE=1 SV=3	2
ALBU_RAT	68686	322		205	0.8371	1.1946	1.02322	0.977303	1.155	2	ALBU_RAT	218	0	308	68686	0.6748	1.48192	1.00521	0.994813	1.123	2	#N/A	#N/A	#N/A	#N/A	#N/A	#N/A	#N/A	#N/A	#N/A	#N/A	#N/A	Serum albumin OS=Rattus norvegicus GN=Alb PE=1 SV=2	#N/A
SNPH_RAT	54460	323		204	0.9394	1.06451	1.14827	0.870875	1.086	5	SNPH_RAT	233	0	291	54460	0.7216	1.38581	1.07493	0.930294	1.11	3	SNPH_RAT	281	0	280	54460	0.6928	1.44342	1.31187	0.762269	1.245	3	Syntaphilin OS=Rattus norvegicus GN=Snph PE=1 SV=1	3.66667
MAG_RAT	69309	324		202	0.6414	1.55909	0.784012	1.27549	1.185	3	#N/A	#N/A	#N/A	#N/A	#N/A	#N/A	#N/A	#N/A	#N/A	#N/A	#N/A	#N/A	#N/A	#N/A	#N/A	#N/A	#N/A	#N/A	#N/A	#N/A	#N/A	#N/A	Myelin-associated glycoprotein OS=Rattus norvegicus GN=Mag PE=1 SV=1	#N/A
PHB2_RAT	33292	326		200	0.5377	1.85977	0.657255	1.52148	1.082	4	PHB2_RAT	292	0	224	33292	0.5063	1.97511	0.754208	1.32589	1.087	4	PHB2_RAT	226	0	358	33292	0.5436	1.83959	1.02935	0.971486	1.042	2	Prohibitin-2 OS=Rattus norvegicus GN=Phb2 PE=1 SV=1	3.33333
MARE3_RAT	31946	325	1	200	0.7677	1.30259	0.938394	1.06565	1.033	5	MARE3_RAT	282	1	233	31946	0.5787	1.72801	0.862059	1.16001	1.189	4	MARE3_RAT	327	1	222	31946	0.7214	1.38619	1.36603	0.732049	1.106	2	Microtubule-associated protein RP/EB family member 3 OS=Rattus norvegicus GN=Mapre3 PE=1 SV=1	3.66667
RL9_RAT	21880	328		198	1.371	0.729395	1.67583	0.596718	1.094	5	RL9_RAT	167	0	402	21880	0.9162	1.09146	1.36481	0.7327	1.043	5	RL9_RAT	256	0	301	21880	0.5973	1.6742	1.13104	0.884145	1.13	5	60S ribosomal protein L9 OS=Rattus norvegicus GN=Rpl9 PE=1 SV=1	5
PSMD2_RAT	100124	331		195	0.4623	2.1631	0.56509	1.76963	1.042	2	#N/A	#N/A	#N/A	#N/A	#N/A	#N/A	#N/A	#N/A	#N/A	#N/A	#N/A	#N/A	#N/A	#N/A	#N/A	#N/A	#N/A	#N/A	#N/A	#N/A	#N/A	#N/A	26S proteasome non-ATPase regulatory subunit 2 OS=Rattus norvegicus GN=Psmd2 PE=1 SV=1	#N/A
CDK5_RAT	33233	332		195	0.4244	2.35627	0.518763	1.92766	1.135	5	CDK5_RAT	242	0	279	33233	0.3523	2.83849	0.524803	1.90548	1.141	7	CDK5_RAT	231	0	350	33233	0.3042	3.28731	0.576027	1.73603	1.163	5	Cyclin-dependent-like kinase 5 OS=Rattus norvegicus GN=Cdk5 PE=1 SV=1	5.66667
SIN1_RAT	59006	337		191	2028000	4.93097e-07	2.47891e+06	4.03402e-07	48660	2	SIN1_RAT	323	0	192	59006	678500	1.47384e-06	1.01073e+06	9.89388e-07	25660	2	#N/A	#N/A	#N/A	#N/A	#N/A	#N/A	#N/A	#N/A	#N/A	#N/A	#N/A	Target of rapamycin complex 2 subunit MAPKAP1 OS=Rattus norvegicus GN=Mapkap1 PE=2 SV=1	#N/A
VDAC1_RAT	30737	339		190	0.7682	1.30174	0.939005	1.06496	1.114	4	VDAC1_RAT	204	0	319	30737	0.7449	1.34246	1.10964	0.901195	1.069	4	VDAC1_RAT	255	0	302	30737	0.5344	1.87126	1.01193	0.988211	1.13	3	Voltage-dependent anion-selective channel protein 1 OS=Rattus norvegicus GN=Vdac1 PE=1 SV=4	3.66667
PP1G_RAT	36960	210	3	189	0.8637	1.15781	1.05574	0.947204	1.056	2	PP1G_RAT	247	3	132	36960	0.7056	1.41723	1.05109	0.951389	1.207	2	PP1G_RAT	170	3	385	36960	0.6911	1.44697	1.30865	0.764144	1.146	4	Serine/threonine-protein phosphatase PP1-gamma catalytic subunit OS=Rattus norvegicus GN=Ppp1cc PE=1 SV=1	2.66667
S61A1_RAT	52231	340		188	0.8294	1.20569	1.01381	0.986376	1.158	4	S61A1_RAT	253	0	263	52231	0.6092	1.6415	0.907493	1.10194	1.362	4	S61A1_RAT	505	0	112	52231	0.6374	1.56887	1.20697	0.828522	1.32	3	Protein transport protein Sec61 subunit alpha isoform 1 OS=Rattus norvegicus GN=Sec61a1 PE=2 SV=2	3.66667
NDRG2_RAT	40753	342		186	0.5136	1.94704	0.627796	1.59287	1.19	3	NDRG2_RAT	311	0	204	40753	0.3681	2.71665	0.548339	1.82369	1.041	2	NDRG2_RAT	282	0	277	40753	0.2765	3.61664	0.523575	1.90995	1.203	3	Protein NDRG2 OS=Rattus norvegicus GN=Ndrg2 PE=1 SV=1	2.66667
NECA1_RAT	40878	343		184	0.4007	2.49563	0.489793	2.04168	1.128	3	NECA1_RAT	239	0	285	40878	0.5791	1.72682	0.862655	1.15921	1.253	3	NECA1_RAT	343	0	206	40878	0.2818	3.54862	0.533611	1.87402	1.216	2	N-terminal EF-hand calcium-binding protein 1 OS=Rattus norvegicus GN=Necab1 PE=1 SV=1	2.66667
TFAM_RAT	28169	345		183	1.406	0.711238	1.71862	0.581863	1.051	2	TFAM_RAT	415	0	124	28169	0.863	1.15875	1.28557	0.777868	1.042	2	TFAM_RAT	447	0	145	28169	0.3431	2.9146	0.649688	1.5392	1.198	2	Transcription factor A, mitochondrial OS=Rattus norvegicus GN=Tfam PE=2 SV=1	2
MAGD1_RAT	85745	347		182	1.015	0.985222	1.24068	0.80601	1.078	2	MAGD1_RAT	296	0	221	85745	1.067	0.937207	1.58945	0.629147	1.403	2	#N/A	#N/A	#N/A	#N/A	#N/A	#N/A	#N/A	#N/A	#N/A	#N/A	#N/A	Melanoma-associated antigen D1 OS=Rattus norvegicus GN=Maged1 PE=1 SV=3	#N/A
PGAM5_RAT	32041	349		181	0.7551	1.32433	0.922992	1.08343	1.085	4	PGAM5_RAT	343	0	173	32041	0.607	1.64745	0.904216	1.10593	1.122	3	PGAM5_RAT	262	0	294	32041	0.37	2.7027	0.700625	1.4273	1.099	8	Serine/threonine-protein phosphatase PGAM5, mitochondrial OS=Rattus norvegicus GN=Pgam5 PE=2 SV=1	5
MBB1A_RAT	152191	351		179	1.268	0.788644	1.54993	0.645189	1.148	2	#N/A	#N/A	#N/A	#N/A	#N/A	#N/A	#N/A	#N/A	#N/A	#N/A	#N/A	MBB1A_RAT	323	0	227	152191	0.718	1.39276	1.35959	0.735515	1.211	2	Myb-binding protein 1A OS=Rattus norvegicus GN=Mybbp1a PE=1 SV=2	#N/A
SDHB_RAT	31809	352		175	0.3157	3.16756	0.385894	2.59138	1.176	3	SDHB_RAT	315	0	200	31809	0.2396	4.17362	0.356919	2.80175	1.608	2	#N/A	#N/A	#N/A	#N/A	#N/A	#N/A	#N/A	#N/A	#N/A	#N/A	#N/A	Succinate dehydrogenase [ubiquinone] iron-sulfur subunit, mitochondrial OS=Rattus norvegicus GN=Sdhb PE=2 SV=2	#N/A
SEPT3_RAT	40572	353		174	0.648	1.54321	0.792079	1.2625	1.057	4	SEPT3_RAT	462	0	103	40572	0.5207	1.92049	0.775659	1.28923	1.106	3	SEPT3_RAT	325	0	226	40572	0.39	2.5641	0.738496	1.3541	1.031	3	Neuronal-specific septin-3 OS=Rattus norvegicus GN=Sept3 PE=1 SV=2	3.33333
NMDE2_RAT	165965	354		174	0.8335	1.19976	1.01882	0.981524	1.298	2	NMDE2_RAT	360	0	162	165965	1.042	0.959693	1.55221	0.644242	1.192	3	NMDE2_RAT	369	0	188	165965	0.6065	1.6488	1.14846	0.870734	1.087	2	Glutamate receptor ionotropic, NMDA 2B OS=Rattus norvegicus GN=Grin2b PE=1 SV=1	2.33333
TOM70_RAT	67402	362		171	0.5154	1.94024	0.629996	1.58731	1.699	2	#N/A	#N/A	#N/A	#N/A	#N/A	#N/A	#N/A	#N/A	#N/A	#N/A	#N/A	TOM70_RAT	384	0	178	67402	0.3888	2.57202	0.736224	1.35828	1.213	2	Mitochondrial import receptor subunit TOM70 OS=Rattus norvegicus GN=Tomm70 PE=1 SV=1	#N/A
TOP1_RAT	90703	365		169	0.9053	1.10461	1.10659	0.903678	1.013	2	#N/A	#N/A	#N/A	#N/A	#N/A	#N/A	#N/A	#N/A	#N/A	#N/A	#N/A	TOP1_RAT	367	1	189	90703	0.8398	1.19076	1.59023	0.62884	1.149	2	DNA topoisomerase 1 OS=Rattus norvegicus GN=Top1 PE=1 SV=1	#N/A
KHDR1_RAT	48285	364		169	0.1898	5.2687	0.232001	4.31033	1.417	4	KHDR1_RAT	537	0	77	48285	0.05038	19.8491	0.0750484	13.3247	1.823	3	KHDR1_RAT	519	0	107	48285	0.09353	10.6918	0.177107	5.64632	1.669	4	KH domain-containing, RNA-binding, signal transduction-associated protein 1 OS=Rattus norvegicus GN=Khdrbs1 PE=1 SV=1	3.66667
KINH_RAT	109463	366	1	168	0.9056	1.10424	1.10696	0.903379	1.24	2	KINH_RAT	403	3	64	109463	0.7816	1.27943	1.16431	0.858879	1.009	2	#N/A	#N/A	#N/A	#N/A	#N/A	#N/A	#N/A	#N/A	#N/A	#N/A	#N/A	Kinesin-1 heavy chain OS=Rattus norvegicus GN=Kif5b PE=1 SV=1	#N/A
GBB2_RAT	37307	203	2	167	0.3814	2.62192	0.466202	2.14499	1.084	4	GBB2_RAT	163	2	315	37307	0.2533	3.94789	0.377328	2.65022	1.26	4	GBB2_RAT	159	2	281	37307	0.4187	2.38834	0.792842	1.26128	1.139	8	Guanine nucleotide-binding protein G(I)/G(S)/G(T) subunit beta-2 OS=Rattus norvegicus GN=Gnb2 PE=1 SV=4	5.33333
NOP16_RAT	21104	367		166	1.247	0.801925	1.52426	0.656055	1.335	3	NOP16_RAT	252	0	265	21104	0.956	1.04603	1.4241	0.702197	1.047	3	#N/A	#N/A	#N/A	#N/A	#N/A	#N/A	#N/A	#N/A	#N/A	#N/A	#N/A	Nucleolar protein 16 OS=Rattus norvegicus GN=Nop16 PE=2 SV=1	#N/A
ODPA_RAT	43199	373		163	0.2867	3.48797	0.350446	2.85351	1.334	2	ODPA_RAT	313	0	203	43199	0.2515	3.97614	0.374646	2.66918	1.354	3	ODPA_RAT	298	0	256	43199	0.2432	4.11184	0.460519	2.17146	1.229	3	Pyruvate dehydrogenase E1 component subunit alpha, somatic form, mitochondrial OS=Rattus norvegicus GN=Pdha1 PE=1 SV=2	2.66667
GPX1_RAT	22292	372		163	1.364	0.733138	1.66728	0.59978	1.128	3	GPX1_RAT	219	0	308	22292	1.075	0.930233	1.60137	0.624465	1.028	6	GPX1_RAT	326	0	226	22292	0.5178	1.93125	0.980496	1.01989	1.155	6	Glutathione peroxidase 1 OS=Rattus norvegicus GN=Gpx1 PE=1 SV=4	5
BACH_RAT	42708	380		159	0.1879	5.32198	0.229679	4.35391	2.153	2	BACH_RAT	353	0	165	42708	0.233	4.29185	0.347088	2.88112	1.603	2	BACH_RAT	421	0	157	42708	0.1901	5.26039	0.35997	2.77801	1.17	2	Cytosolic acyl coenzyme A thioester hydrolase OS=Rattus norvegicus GN=Acot7 PE=1 SV=4	2
PPR1B_RAT	22899	379		159	0.5657	1.76772	0.69148	1.44617	1.387	2	PPR1B_RAT	575	0	64	22899	0.5875	1.70213	0.875168	1.14264	1.052	2	PPR1B_RAT	400	0	165	22899	0.828	1.20773	1.56788	0.637802	1.064	3	Protein phosphatase 1 regulatory subunit 1B OS=Rattus norvegicus GN=Ppp1r1b PE=1 SV=1	2.33333
EIF3H_RAT	39880	381		158	1.014	0.986193	1.23946	0.806805	1.107	4	EIF3H_RAT	522	0	84	39880	0.9166	1.09099	1.36541	0.732381	1.072	4	EIF3H_RAT	522	0	106	39880	0.4797	2.08464	0.908351	1.1009	1.66	3	Eukaryotic translation initiation factor 3 subunit H OS=Rattus norvegicus GN=Eif3h PE=1 SV=1	3.66667
RS7_RAT	22113	383		156	0.9085	1.10072	1.1105	0.900495	1.236	5	RS7_RAT	265	0	254	22113	0.6922	1.44467	1.03113	0.969806	1.19	6	RS7_RAT	187	0	441	22113	0.416	2.40385	0.78773	1.26947	1.089	9	40S ribosomal protein S7 OS=Rattus norvegicus GN=Rps7 PE=1 SV=1	6.66667
KPCD_RAT	77470	179	3	154	0.8721	1.14666	1.06601	0.93808	1.027	3	KPCD_RAT	463	0	103	77470	0.5771	1.7328	0.859675	1.16323	1.235	2	#N/A	#N/A	#N/A	#N/A	#N/A	#N/A	#N/A	#N/A	#N/A	#N/A	#N/A	Protein kinase C delta type OS=Rattus norvegicus GN=Prkcd PE=1 SV=1	#N/A
MDHM_RAT	35661	390		151	0.686	1.45773	0.838528	1.19257	1.194	2	#N/A	#N/A	#N/A	#N/A	#N/A	#N/A	#N/A	#N/A	#N/A	#N/A	#N/A	#N/A	#N/A	#N/A	#N/A	#N/A	#N/A	#N/A	#N/A	#N/A	#N/A	#N/A	Malate dehydrogenase, mitochondrial OS=Rattus norvegicus GN=Mdh2 PE=1 SV=2	#N/A
S6A11_RAT	69900	391		150	0.3688	2.7115	0.450801	2.21828	1.089	2	#N/A	#N/A	#N/A	#N/A	#N/A	#N/A	#N/A	#N/A	#N/A	#N/A	#N/A	S6A11_RAT	336	0	215	69900	0.33	3.0303	0.624882	1.6003	1.216	3	Sodium- and chloride-dependent GABA transporter 3 OS=Rattus norvegicus GN=Slc6a11 PE=1 SV=1	#N/A
LPPRC_RAT	156554	392		150	0.869	1.15075	1.06222	0.941427	1.292	3	LPPRC_RAT	290	0	225	156554	0.7335	1.36333	1.09266	0.915201	1.757	2	#N/A	#N/A	#N/A	#N/A	#N/A	#N/A	#N/A	#N/A	#N/A	#N/A	#N/A	Leucine-rich PPR motif-containing protein, mitochondrial OS=Rattus norvegicus GN=Lrpprc PE=1 SV=1	#N/A
PLCB1_RAT	138257	400		146	0.9664	1.03477	1.18127	0.846544	1.076	2	#N/A	#N/A	#N/A	#N/A	#N/A	#N/A	#N/A	#N/A	#N/A	#N/A	#N/A	#N/A	#N/A	#N/A	#N/A	#N/A	#N/A	#N/A	#N/A	#N/A	#N/A	#N/A	1-phosphatidylinositol 4,5-bisphosphate phosphodiesterase beta-1 OS=Rattus norvegicus GN=Plcb1 PE=1 SV=1	#N/A
ERMIN_RAT	32208	399		146	0.287	3.48432	0.350813	2.85052	1.412	2	ERMIN_RAT	394	0	136	32208	0.5092	1.96386	0.758528	1.31834	1.204	3	#N/A	#N/A	#N/A	#N/A	#N/A	#N/A	#N/A	#N/A	#N/A	#N/A	#N/A	Ermin OS=Rattus norvegicus GN=Ermn PE=1 SV=1	#N/A
CAH2_RAT	29096	397		146	1.132	0.883392	1.38369	0.722703	1.049	2	CAH2_RAT	528	0	82	29096	0.9558	1.04624	1.4238	0.702344	1.175	3	CAH2_RAT	690	0	59	29096	0.4816	2.07641	0.911948	1.09655	1.156	3	Carbonic anhydrase 2 OS=Rattus norvegicus GN=Ca2 PE=1 SV=2	2.66667
RAB14_RAT	23912	403		143	7.54	0.132626	9.21648	0.108501	7.171	2	#N/A	#N/A	#N/A	#N/A	#N/A	#N/A	#N/A	#N/A	#N/A	#N/A	#N/A	#N/A	#N/A	#N/A	#N/A	#N/A	#N/A	#N/A	#N/A	#N/A	#N/A	#N/A	Ras-related protein Rab-14 OS=Rattus norvegicus GN=Rab14 PE=1 SV=3	#N/A
RL11_RAT	20240	406		141	0.6728	1.48633	0.822393	1.21596	1.247	2	RL11_RAT	12	2	277	20240	0.557	1.79533	0.829733	1.20521	1.108	4	RL11_RAT	179	0	447	20240	0.3567	2.80348	0.67544	1.48052	1.03	3	60S ribosomal protein L11 OS=Rattus norvegicus GN=Rpl11 PE=1 SV=2	3
RTN1_RAT	82951	409	1	138	1.018	0.982318	1.24435	0.803635	1.149	2	#N/A	#N/A	#N/A	#N/A	#N/A	#N/A	#N/A	#N/A	#N/A	#N/A	#N/A	#N/A	#N/A	#N/A	#N/A	#N/A	#N/A	#N/A	#N/A	#N/A	#N/A	#N/A	Reticulon-1 OS=Rattus norvegicus GN=Rtn1 PE=1 SV=1	#N/A
SAHH2_RAT	53719	410		137	0.3486	2.86862	0.426109	2.34682	1.23	2	SAHH2_RAT	444	0	112	53719	0.2924	3.41997	0.435573	2.29583	1.057	3	SAHH2_RAT	440	0	148	53719	0.3944	2.5355	0.746828	1.339	1.146	2	Adenosylhomocysteinase 2 OS=Rattus norvegicus GN=Ahcyl1 PE=1 SV=2	2.33333
SEPT5_RAT	42825	415		135	0.5131	1.94894	0.627185	1.59443	1.192	4	SEPT5_RAT	286	0	231	42825	0.4247	2.3546	0.632653	1.58065	1.042	5	SEPT5_RAT	380	0	179	42825	0.4712	2.12224	0.892255	1.12076	1.142	2	Septin-5 OS=Rattus norvegicus GN=Sept5 PE=1 SV=2	3.66667
RB6I2_RAT	108751	419	1	132	3.461	0.288934	4.23053	0.236377	1.927	2	#N/A	#N/A	#N/A	#N/A	#N/A	#N/A	#N/A	#N/A	#N/A	#N/A	#N/A	#N/A	#N/A	#N/A	#N/A	#N/A	#N/A	#N/A	#N/A	#N/A	#N/A	#N/A	ELKS/Rab6-interacting/CAST family member 1 OS=Rattus norvegicus GN=Erc1 PE=1 SV=1	#N/A
GPM6A_RAT	31174	421		132	0.7443	1.34354	0.909791	1.09915	1.122	2	GPM6A_RAT	338	0	182	31174	0.5304	1.88537	0.790109	1.26565	1.157	2	GPM6A_RAT	479	0	124	31174	0.4543	2.20119	0.860254	1.16245	1.106	2	Neuronal membrane glycoprotein M6-a OS=Rattus norvegicus GN=Gpm6a PE=1 SV=1	2
GRB2_RAT	25190	423		130	0.9281	1.07747	1.13446	0.881478	1.141	5	GRB2_RAT	244	0	272	25190	0.9123	1.09613	1.359	0.735833	1.05	5	GRB2_RAT	425	0	155	25190	0.4372	2.28728	0.827874	1.20791	1.334	3	Growth factor receptor-bound protein 2 OS=Rattus norvegicus GN=Grb2 PE=1 SV=1	4.33333
MOES_RAT	67697	428		128	0.322	3.10559	0.393595	2.54068	1.271	2	MOES_RAT	357	0	164	67697	0.1978	5.05561	0.294652	3.39383	1.219	3	MOES_RAT	394	0	172	67697	0.2896	3.45304	0.548381	1.82355	1.194	3	Moesin OS=Rattus norvegicus GN=Msn PE=1 SV=3	2.66667
RL26_RAT	17267	430		128	0.5625	1.77778	0.687569	1.4544	1.19	2	RL26_RAT	454	0	106	17267	0.6222	1.6072	0.926858	1.07891	1.053	2	RL26_RAT	362	0	193	17267	0.09758	10.248	0.184776	5.41197	4.365	2	60S ribosomal protein L26 OS=Rattus norvegicus GN=Rpl26 PE=1 SV=1	2
C1QBP_RAT	30978	433		127	0.006711	149.009	0.00820315	121.904	6.556	2	#N/A	#N/A	#N/A	#N/A	#N/A	#N/A	#N/A	#N/A	#N/A	#N/A	#N/A	#N/A	#N/A	#N/A	#N/A	#N/A	#N/A	#N/A	#N/A	#N/A	#N/A	#N/A	Complement component 1 Q subcomponent-binding protein, mitochondrial OS=Rattus norvegicus GN=C1qbp PE=1 SV=2	#N/A
RL28_RAT	15839	432	1	127	0.7235	1.38217	0.884366	1.13075	1.08	2	RL28_RAT	485	0	95	15839	0.6904	1.44844	1.02845	0.972335	1.155	2	RL28_RAT	543	0	100	15839	0.8958	1.11632	1.69627	0.589529	1.004	2	60S ribosomal protein L28 OS=Rattus norvegicus GN=Rpl28 PE=1 SV=4	2
LASP1_RAT	29951	436		126	0.6669	1.49948	0.815182	1.22672	1.181	2	LASP1_RAT	364	0	160	29951	0.6713	1.48965	1	1	1.159	4	#N/A	#N/A	#N/A	#N/A	#N/A	#N/A	#N/A	#N/A	#N/A	#N/A	#N/A	LIM and SH3 domain protein 1 OS=Rattus norvegicus GN=Lasp1 PE=1 SV=1	#N/A
ZFR_RAT	116745	440		124	1.237	0.808407	1.51204	0.661358	1.121	2	ZFR_RAT	616	0	57	116745	1.218	0.821018	1.81439	0.551149	1.071	2	ZFR_RAT	331	0	219	116745	0.6565	1.52323	1.24314	0.804417	1.631	2	Zinc finger RNA-binding protein OS=Rattus norvegicus GN=Zfr PE=1 SV=2	2
RL18A_RAT	20719	447		119	0.6176	1.61917	0.75492	1.32464	1.004	2	RL18A_RAT	330	0	187	20719	0.478	2.09205	0.712051	1.40439	1.081	5	#N/A	#N/A	#N/A	#N/A	#N/A	#N/A	#N/A	#N/A	#N/A	#N/A	#N/A	60S ribosomal protein L18a OS=Rattus norvegicus GN=Rpl18a PE=2 SV=1	#N/A
ARFG3_RAT	57635	450		118	0.6845	1.46092	0.836695	1.19518	1.027	2	ARFG3_RAT	293	0	224	57635	0.3338	2.99581	0.497244	2.01108	1.055	2	ARFG3_RAT	321	0	228	57635	0.3822	2.61643	0.723727	1.38174	1.084	2	ADP-ribosylation factor GTPase-activating protein 3 OS=Rattus norvegicus GN=Arfgap3 PE=1 SV=1	2
TERA_RAT	89293	448		118	0.4741	2.10926	0.579514	1.72559	2.072	2	TERA_RAT	425	0	119	89293	0.9636	1.03778	1.43542	0.696658	2.118	3	TERA_RAT	375	0	182	89293	1.245	0.803213	2.35751	0.424177	1.093	2	Transitional endoplasmic reticulum ATPase OS=Rattus norvegicus GN=Vcp PE=1 SV=3	2.33333
EIF3I_RAT	36438	457		115	1.1	0.909091	1.34458	0.743727	1.114	3	EIF3I_RAT	308	0	211	36438	0.7362	1.35833	1.09668	0.911845	1.027	3	EIF3I_RAT	263	0	294	36438	1.131	0.884173	2.14164	0.466932	1.025	4	Eukaryotic translation initiation factor 3 subunit I OS=Rattus norvegicus GN=Eif3i PE=2 SV=1	3.33333
ECI2_RAT	42994	462		112	0.5332	1.87547	0.651754	1.53432	1.478	2	#N/A	#N/A	#N/A	#N/A	#N/A	#N/A	#N/A	#N/A	#N/A	#N/A	#N/A	#N/A	#N/A	#N/A	#N/A	#N/A	#N/A	#N/A	#N/A	#N/A	#N/A	#N/A	Enoyl-CoA delta isomerase 2, mitochondrial OS=Rattus norvegicus GN=Eci2 PE=1 SV=1	#N/A
SYPH_RAT	33289	464		112	0.6345	1.57604	0.775578	1.28936	1.178	2	#N/A	#N/A	#N/A	#N/A	#N/A	#N/A	#N/A	#N/A	#N/A	#N/A	#N/A	#N/A	#N/A	#N/A	#N/A	#N/A	#N/A	#N/A	#N/A	#N/A	#N/A	#N/A	Synaptophysin OS=Rattus norvegicus GN=Syp PE=1 SV=1	#N/A
GBB5_RAT	38707	463		112	0.6347	1.57555	0.775822	1.28896	1.07	2	GBB5_RAT	217	0	309	38707	0.4256	2.34962	0.633994	1.5773	1.1983	4	GBB5_RAT	222	0	372	38707	0.2778	3.59971	0.526037	1.90101	1.2938	2	Guanine nucleotide-binding protein subunit beta-5 OS=Rattus norvegicus GN=Gnb5 PE=2 SV=1	2.66667
DLGP3_RAT	105925	96	3	111	0.5105	1.95886	0.624007	1.60255	1.358	2	#N/A	#N/A	#N/A	#N/A	#N/A	#N/A	#N/A	#N/A	#N/A	#N/A	#N/A	#N/A	#N/A	#N/A	#N/A	#N/A	#N/A	#N/A	#N/A	#N/A	#N/A	#N/A	Disks large-associated protein 3 OS=Rattus norvegicus GN=Dlgap3 PE=1 SV=2	#N/A
PRDX1_RAT	22095	408	2	107	0.388	2.57732	0.47427	2.10851	1.033	3	#N/A	#N/A	#N/A	#N/A	#N/A	#N/A	#N/A	#N/A	#N/A	#N/A	#N/A	#N/A	#N/A	#N/A	#N/A	#N/A	#N/A	#N/A	#N/A	#N/A	#N/A	#N/A	Peroxiredoxin-1 OS=Rattus norvegicus GN=Prdx1 PE=1 SV=1	#N/A
AIMP2_RAT	35420	495		98	0.9904	1.00969	1.21061	0.82603	1.179	3	#N/A	#N/A	#N/A	#N/A	#N/A	#N/A	#N/A	#N/A	#N/A	#N/A	#N/A	AIMP2_RAT	653	0	69	35420	1.057	0.946074	2.00151	0.499622	1.171	2	Aminoacyl tRNA synthase complex-interacting multifunctional protein 2 OS=Rattus norvegicus GN=Aimp2 PE=2 SV=1	#N/A
NDUF6_RAT	38491	500		96	0.1404	7.12251	0.171617	5.82692	1.461	2	NDUF6_RAT	366	0	158	38491	0.1336	7.48503	0.199017	5.0247	1.216	2	#N/A	#N/A	#N/A	#N/A	#N/A	#N/A	#N/A	#N/A	#N/A	#N/A	#N/A	NADH dehydrogenase (ubiquinone) complex I, assembly factor 6 OS=Rattus norvegicus GN=Ndufaf6 PE=3 SV=1	#N/A
KIF1C_RAT	122258	200	2	93	0.8339	1.19918	1.01931	0.981053	1.211	2	#N/A	#N/A	#N/A	#N/A	#N/A	#N/A	#N/A	#N/A	#N/A	#N/A	#N/A	#N/A	#N/A	#N/A	#N/A	#N/A	#N/A	#N/A	#N/A	#N/A	#N/A	#N/A	Kinesin-like protein KIF1C OS=Rattus norvegicus GN=Kif1c PE=1 SV=1	#N/A
SYF2_RAT	28695	509		91	0.08828	11.3276	0.107909	9.2671	2.99	3	#N/A	#N/A	#N/A	#N/A	#N/A	#N/A	#N/A	#N/A	#N/A	#N/A	#N/A	#N/A	#N/A	#N/A	#N/A	#N/A	#N/A	#N/A	#N/A	#N/A	#N/A	#N/A	Pre-mRNA-splicing factor SYF2 OS=Rattus norvegicus GN=Syf2 PE=2 SV=1	#N/A
CCD50_RAT	35137	520		88	1.152	0.868056	1.40814	0.710156	1.411	2	#N/A	#N/A	#N/A	#N/A	#N/A	#N/A	#N/A	#N/A	#N/A	#N/A	#N/A	#N/A	#N/A	#N/A	#N/A	#N/A	#N/A	#N/A	#N/A	#N/A	#N/A	#N/A	Coiled-coil domain-containing protein 50 OS=Rattus norvegicus GN=Ccdc50 PE=2 SV=1	#N/A
HNRPL_RAT	67860	536		82	0.623	1.60514	0.761521	1.31316	1.076	3	#N/A	#N/A	#N/A	#N/A	#N/A	#N/A	#N/A	#N/A	#N/A	#N/A	#N/A	HNRPL_RAT	561	0	94	67860	0.6101	1.63908	1.15527	0.865596	1.088	2	Heterogeneous nuclear ribonucleoprotein L OS=Rattus norvegicus GN=Hnrnpl PE=1 SV=2	#N/A
H15_RAT	22635	553		77	0.9602	1.04145	1.1737	0.85201	1.145	2	#N/A	#N/A	#N/A	#N/A	#N/A	#N/A	#N/A	#N/A	#N/A	#N/A	#N/A	H15_RAT	455	0	142	22635	0.9112	1.09745	1.72543	0.579565	1.008	2	Histone H1.5 OS=Rattus norvegicus GN=Hist1h1b PE=1 SV=1	#N/A
GP158_RAT	134374	563		73	0.5079	1.96889	0.620829	1.61075	1.128	2	#N/A	#N/A	#N/A	#N/A	#N/A	#N/A	#N/A	#N/A	#N/A	#N/A	#N/A	#N/A	#N/A	#N/A	#N/A	#N/A	#N/A	#N/A	#N/A	#N/A	#N/A	#N/A	Probable G-protein coupled receptor 158 OS=Rattus norvegicus GN=Gpr158 PE=1 SV=1	#N/A
AAKG1_RAT	37363	564		73	0.3425	2.91971	0.418653	2.38861	1.104	3	AAKG1_RAT	613	0	58	37363	0.2629	3.80373	0.391628	2.55344	1.071	3	#N/A	#N/A	#N/A	#N/A	#N/A	#N/A	#N/A	#N/A	#N/A	#N/A	#N/A	5'-AMP-activated protein kinase subunit gamma-1 OS=Rattus norvegicus GN=Prkag1 PE=1 SV=3	#N/A
DNA2_RAT	119512	565		73	1.08	0.925926	1.32013	0.7575	1.011	2	DNA2_RAT	702	0	43	119512	0.9924	1.00766	1.47833	0.676441	1.028	2	DNA2_RAT	926	0	26	119512	0.7413	1.34898	1.40371	0.712397	1.079	2	DNA replication ATP-dependent helicase/nuclease DNA2 OS=Rattus norvegicus GN=Dna2 PE=3 SV=1	2
RS5_RAT	22864	577		70	0.8247	1.21256	1.00807	0.991997	1.099	5	RS5_RAT	267	0	250	22864	0.7519	1.32996	1.12007	0.892805	1.035	4	RS5_RAT	495	0	114	22864	0.4786	2.08943	0.906268	1.10343	1.103	3	40S ribosomal protein S5 OS=Rattus norvegicus GN=Rps5 PE=1 SV=3	4
RL35_RAT	14544	578		69	0.8988	1.11259	1.09864	0.910214	1.133	2	#N/A	#N/A	#N/A	#N/A	#N/A	#N/A	#N/A	#N/A	#N/A	#N/A	#N/A	#N/A	#N/A	#N/A	#N/A	#N/A	#N/A	#N/A	#N/A	#N/A	#N/A	#N/A	60S ribosomal protein L35 OS=Rattus norvegicus GN=Rpl35 PE=1 SV=3	#N/A
KIF5A_RAT	116843	366	3	67	0.9056	1.10424	1.10696	0.903379	1.24	2	KIF5A_RAT	403	1	130	116843	0.7399	1.35153	1.10219	0.907285	1.059	3	KIF5A_RAT	290	1	265	116843	0.4177	2.39406	0.790949	1.2643	1.301	2	Kinesin heavy chain isoform 5A OS=Rattus norvegicus GN=Kif5a PE=1 SV=1	2.33333
CEND_RAT	15034	645		55	0.5072	1.97161	0.619973	1.61297	1.183	2	CEND_RAT	498	0	92	15034	0.4836	2.06782	0.720393	1.38813	1.069	2	CEND_RAT	409	0	161	15034	0.3218	3.10752	0.609354	1.64108	1.079	2	Cell cycle exit and neuronal differentiation protein 1 OS=Rattus norvegicus GN=Cend1 PE=1 SV=1	2
RYDEN_RAT	18852	653		54	0.9278	1.07782	1.13409	0.881763	1.067	2	#N/A	#N/A	#N/A	#N/A	#N/A	#N/A	#N/A	#N/A	#N/A	#N/A	#N/A	#N/A	#N/A	#N/A	#N/A	#N/A	#N/A	#N/A	#N/A	#N/A	#N/A	#N/A	Repressor of yield of DENV protein homolog OS=Rattus norvegicus GN=Ryden PE=2 SV=1	#N/A
HNRDL_RAT	35272	677		48	0.8941	1.11844	1.0929	0.914998	1.232	2	#N/A	#N/A	#N/A	#N/A	#N/A	#N/A	#N/A	#N/A	#N/A	#N/A	#N/A	#N/A	#N/A	#N/A	#N/A	#N/A	#N/A	#N/A	#N/A	#N/A	#N/A	#N/A	Heterogeneous nuclear ribonucleoprotein D-like OS=Rattus norvegicus GN=Hnrnpdl PE=1 SV=1	#N/A
CALB1_RAT	29975	690		45	0.6313	1.58403	0.771666	1.2959	1.072	2	#N/A	#N/A	#N/A	#N/A	#N/A	#N/A	#N/A	#N/A	#N/A	#N/A	#N/A	#N/A	#N/A	#N/A	#N/A	#N/A	#N/A	#N/A	#N/A	#N/A	#N/A	#N/A	Calbindin OS=Rattus norvegicus GN=Calb1 PE=1 SV=2	#N/A
IF4E_RAT	25037	698		43	0.7337	1.36295	0.896834	1.11503	1.187	2	IF4E_RAT	491	0	94	25037	0.4605	2.17155	0.685982	1.45776	1.044	2	#N/A	#N/A	#N/A	#N/A	#N/A	#N/A	#N/A	#N/A	#N/A	#N/A	#N/A	Eukaryotic translation initiation factor 4E OS=Rattus norvegicus GN=Eif4e PE=1 SV=1	#N/A
CXA1_RAT	43004	750		36	1.136	0.880282	1.38858	0.720158	1.43	2	CXA1_RAT	619	0	57	43004	1.38	0.724638	2.05571	0.486449	1.413	3	CXA1_RAT	671	0	65	43004	0.7469	1.33887	1.41432	0.707056	1.283	4	Gap junction alpha-1 protein OS=Rattus norvegicus GN=Gja1 PE=1 SV=2	3
SRR_RAT	35671	815		29	0.6578	1.52022	0.804058	1.24369	1.063	2	#N/A	#N/A	#N/A	#N/A	#N/A	#N/A	#N/A	#N/A	#N/A	#N/A	#N/A	#N/A	#N/A	#N/A	#N/A	#N/A	#N/A	#N/A	#N/A	#N/A	#N/A	#N/A	Serine racemase OS=Rattus norvegicus GN=Srr PE=1 SV=1	#N/A
PLEC_RAT	533214	871		25	1.165	0.858369	1.42403	0.702232	1.919	2	#N/A	#N/A	#N/A	#N/A	#N/A	#N/A	#N/A	#N/A	#N/A	#N/A	#N/A	#N/A	#N/A	#N/A	#N/A	#N/A	#N/A	#N/A	#N/A	#N/A	#N/A	#N/A	Plectin OS=Rattus norvegicus GN=Plec PE=1 SV=2	#N/A

## Sheet: Combined 2
				Median	0.8214	1.21745											0.69215	1.44477											0.54305	1.84145
Accession	Mass	Hit numer	Member	Score	Heavy/Light Ratio	L/H	H/L Ratio Norm.	L/H Ratio Norm.	LOG2 L/H Ratio Norm.	Standard deviation	pep count #	Accession	Hit numer	Member	Score	Mass	Heavy/Light Ratio	L/H	H/L Ratio Norm.	L/H Ratio Norm.	LOG2 L/H Ratio Norm.	Standard deviation	pep count #	Accession	Hit numer	Member	Score	Mass	Heavy/Light Ratio	L/H	H/L Ratio Norm.	L/H Ratio Norm.	LOG2 L/H Ratio Norm.	Standard deviation	pep count #	Description	Mean LOG2 L/H Norm	Mean LOG2 L/H Norm SD	Mean L/H Norm	Mean L/H Norm SD	Rank	Average pep count
SORT_RAT	91111	208		340	0.06644	15.0512	0.0808863	12.3628	3.62794	1.501	4	SORT_RAT	197	0	332	91111	0.05136	19.4704	0.0742036	13.4764	3.75237	1.646	4	SORT_RAT	339	0	212	91111	0.05315	18.8147	0.0978731	10.2173	3.35294	1.136	2	Sortilin OS=Rattus norvegicus GN=Sort1 PE=1 SV=3	3.57775	0.204388	11.9402	1.1522	1	3.33333
ARM10_RAT	33401	272		255	0.1179	8.48176	0.143535	6.96681	2.8005	1.181	2	ARM10_RAT	206	0	319	33401	0.09221	10.8448	0.133223	7.50624	2.90809	1.793	2	ARM10_RAT	296	0	257	33401	0.06608	15.1332	0.121683	8.21806	3.0388	1.28	3	Armadillo repeat-containing protein 10 OS=Rattus norvegicus GN=Armc10 PE=1 SV=1	2.9158	0.119337	7.54643	1.08624	2	2.33333
KHDR1_RAT	48285	364		169	0.1898	5.2687	0.231069	4.32764	2.11358	1.417	4	KHDR1_RAT	537	0	77	48285	0.05038	19.8491	0.0727877	13.7386	3.78016	1.823	3	KHDR1_RAT	519	0	107	48285	0.09353	10.6918	0.172231	5.80615	2.53758	1.669	4	KH domain-containing, RNA-binding, signal transduction-associated protein 1 OS=Rattus norvegicus GN=Khdrbs1 PE=1 SV=1	2.81044	0.866147	7.01499	1.82279	3	3.66667
LGI1_RAT	63687	194		390	0.1051	9.51475	0.127952	7.81529	2.9663	1.232	3	LGI1_RAT	207	0	317	63687	0.09984	10.016	0.144246	6.93259	2.79339	1.328	2	LGI1_RAT	276	0	284	63687	0.1173	8.52515	0.216002	4.62958	2.21088	1.066	2	Leucine-rich glioma-inactivated protein 1 OS=Rattus norvegicus GN=Lgi1 PE=1 SV=1	2.65686	0.395785	6.30658	1.31566	4	2.33333
ACSL3_RAT	80406	192	1	391	0.08695	11.5009	0.105856	9.44666	3.2398	1.146	2	ACSL3_RAT	192	1	341	80406	0.1216	8.22368	0.175684	5.69202	2.50894	1.602	3	ACSL3_RAT	194	1	431	80406	0.1606	6.22665	0.295737	3.38138	1.75761	1.28	3	Long-chain-fatty-acid--CoA ligase 3 OS=Rattus norvegicus GN=Acsl3 PE=1 SV=1	2.50212	0.74112	5.66517	1.67147	5	2.66667
TXTP_RAT	33814	125		582	0.2204	4.53721	0.268322	3.7268	1.89794	1.128	8	TXTP_RAT	109	0	617	33814	0.1243	8.04505	0.179585	5.56838	2.47726	1.129	7	TXTP_RAT	145	0	558	33814	0.08769	11.4038	0.161477	6.19283	2.6306	1.21	8	Tricarboxylate transport protein, mitochondrial OS=Rattus norvegicus GN=Slc25a1 PE=1 SV=1	2.33527	0.386419	5.04644	1.30715	6	7.66667
SFXN3_RAT	35411	114	1	628	0.191	5.2356	0.23253	4.30045	2.10449	1.118	9	SFXN3_RAT	72	1	825	35411	0.1553	6.43915	0.224373	4.45686	2.15603	1.127	11	SFXN3_RAT	105	1	695	35411	0.09778	10.227	0.180057	5.55379	2.47347	1.203	10	Sideroflexin-3 OS=Rattus norvegicus GN=Sfxn3 PE=2 SV=1	2.24466	0.199823	4.73926	1.14856	7	10
ADT2_RAT	32880	9	1	4494	0.2478	4.03551	0.30168	3.31472	1.72889	1.077	21	ADT2_RAT	9	1	3926	32880	0.1897	5.27148	0.274074	3.64866	1.86737	1.122	20	ADT2_RAT	8	1	4319	32880	0.1084	9.22509	0.199613	5.00968	2.32472	1.146	22	ADP/ATP translocase 2 OS=Rattus norvegicus GN=Slc25a5 PE=1 SV=3	1.97366	0.311814	3.92762	1.24127	8	21
ADT1_RAT	32968	9	2	4287	0.2551	3.92003	0.310567	3.21986	1.687	1.072	18	ADT1_RAT	9	2	3431	32968	0.1971	5.07357	0.284765	3.51167	1.81216	1.123	18	ADT1_RAT	8	2	3210	32968	0.1127	8.87311	0.207532	4.81854	2.2686	1.098	17	ADP/ATP translocase 1 OS=Rattus norvegicus GN=Slc25a4 PE=1 SV=3	1.92258	0.30612	3.79101	1.23638	9	17.6667
AAPK1_RAT	63933	140	1	529	0.2694	3.71195	0.327977	3.04895	1.60831	1.252	6	AAPK1_RAT	127	1	533	63933	0.1472	6.79348	0.212671	4.70211	2.23331	1.111	5	AAPK1_RAT	151	1	520	63933	0.1676	5.96659	0.308627	3.24015	1.69606	1.17	5	5'-AMP-activated protein kinase catalytic subunit alpha-1 OS=Rattus norvegicus GN=Prkaa1 PE=1 SV=2	1.84589	0.338367	3.59475	1.26432	10	5.33333
SFXN5_RAT	37281	155		473	0.2798	3.57398	0.340638	2.93562	1.55367	1.33	3	SFXN5_RAT	165	0	417	37281	0.2438	4.10172	0.352236	2.83901	1.50539	1.327	5	SFXN5_RAT	189	0	440	37281	0.1094	9.14077	0.201455	4.96389	2.31147	1.238	5	Sideroflexin-5 OS=Rattus norvegicus GN=Sfxn5 PE=2 SV=1	1.79017	0.452101	3.45857	1.36803	11	4.33333
STXB1_RAT	67526	143		513	0.41	2.43902	0.499148	2.00338	1.00244	1.163	4	STXB1_RAT	158	0	435	67526	0.1922	5.20291	0.277685	3.6012	1.84848	1.235	4	STXB1_RAT	164	0	484	67526	0.1053	9.49668	0.193905	5.15716	2.36658	1.823	2	Syntaxin-binding protein 1 OS=Rattus norvegicus GN=Stxbp1 PE=1 SV=1	1.73916	0.688608	3.33842	1.61173	12	3.33333
MPCP_RAT	39419	166		434	0.3182	3.14268	0.387387	2.58135	1.36813	1.287	6	MPCP_RAT	195	0	336	39419	0.2608	3.83436	0.376797	2.65395	1.40814	1.253	5	MPCP_RAT	272	0	288	39419	0.1377	7.26216	0.253568	3.94371	1.97955	1.187	5	Phosphate carrier protein, mitochondrial OS=Rattus norvegicus GN=Slc25a3 PE=1 SV=1	1.58527	0.342042	3.00065	1.26755	13	5.33333
ATAD3_RAT	66718	174		420	0.2809	3.55999	0.341977	2.92413	1.54801	1.094	6	ATAD3_RAT	291	0	225	66718	0.2295	4.3573	0.331576	3.0159	1.59259	1.116	3	ATAD3_RAT	210	0	391	66718	0.2176	4.59559	0.4007	2.49563	1.31941	1.103	5	ATPase family AAA domain-containing protein 3 OS=Rattus norvegicus GN=Atad3 PE=1 SV=1	1.48667	0.146558	2.80241	1.10693	14	4.66667
PP2BB_RAT	59076	121	2	515	0.2953	3.38639	0.359508	2.78153	1.47588	1.071	6	PP2BB_RAT	117	2	483	59076	0.2476	4.03877	0.357726	2.79544	1.48307	1.078	6	PP2BB_RAT	132	2	581	59076	0.2248	4.4484	0.413958	2.4157	1.27244	1.097	4	Serine/threonine-protein phosphatase 2B catalytic subunit beta isoform OS=Rattus norvegicus GN=Ppp3cb PE=1 SV=1	1.41047	0.119586	2.65823	1.08642	15	5.33333
PP2BA_RAT	58606	121	1	596	0.2929	3.41413	0.356586	2.80432	1.48765	1.229	4	PP2BA_RAT	117	1	560	58606	0.2514	3.97772	0.363216	2.75318	1.4611	1.124	6	PP2BA_RAT	132	1	591	58606	0.2366	4.22654	0.435687	2.29522	1.19863	1.085	2	Serine/threonine-protein phosphatase 2B catalytic subunit alpha isoform OS=Rattus norvegicus GN=Ppp3ca PE=1 SV=1	1.38246	0.159753	2.60713	1.1171	16	4
ODPA_RAT	43199	373		163	0.2867	3.48797	0.349038	2.86497	1.51852	1.334	2	ODPA_RAT	313	0	203	43199	0.2515	3.97614	0.363361	2.75209	1.46053	1.354	3	ODPA_RAT	298	0	256	43199	0.2432	4.11184	0.447841	2.23293	1.15894	1.229	3	Pyruvate dehydrogenase E1 component subunit alpha, somatic form, mitochondrial OS=Rattus norvegicus GN=Pdha1 PE=1 SV=2	1.37933	0.193052	2.60147	1.14318	17	2.66667
MOES_RAT	67697	428		128	0.322	3.10559	0.392014	2.55089	1.351	1.271	2	MOES_RAT	357	0	164	67697	0.1978	5.05561	0.285776	3.49924	1.80704	1.219	3	MOES_RAT	394	0	172	67697	0.2896	3.45304	0.533284	1.87517	0.907022	1.194	3	Moesin OS=Rattus norvegicus GN=Msn PE=1 SV=3	1.35502	0.450024	2.55801	1.36606	18	2.66667
TECR_RAT	36099	282		246	0.2699	3.70508	0.328585	3.0433	1.60564	1.308	3	TECR_RAT	246	0	271	36099	0.2345	4.26439	0.338799	2.9516	1.5615	1.235	5	TECR_RAT	328	0	221	36099	0.3133	3.19183	0.576927	1.73332	0.793539	1.487	5	Very-long-chain enoyl-CoA reductase OS=Rattus norvegicus GN=Tecr PE=1 SV=1	1.32022	0.456656	2.49705	1.37236	19	4.33333
C2D1A_RAT	103523	75	1	892	0.3084	3.24254	0.375457	2.66338	1.41326	1.058	7	C2D1A_RAT	97	0	662	103523	0.3088	3.23834	0.446146	2.24142	1.16441	1.167	11	C2D1A_RAT	79	0	902	103523	0.2119	4.71921	0.390203	2.56276	1.3577	1.121	12	Coiled-coil and C2 domain-containing protein 1A OS=Rattus norvegicus GN=Cc2d1a PE=1 SV=2	1.31179	0.130621	2.48249	1.09477	20	10
INP4A_RAT	105522	76		885	0.1742	5.74053	0.212077	4.71519	2.23732	1.416	4	INP4A_RAT	83	0	749	105522	0.4631	2.15936	0.669075	1.4946	0.579761	1.399	4	INP4A_RAT	58	0	1165	105522	0.2549	3.92311	0.469386	2.13044	1.09115	1.042	4	Type I inositol 3,4-bisphosphate 4-phosphatase OS=Rattus norvegicus GN=Inpp4a PE=1 SV=1	1.30274	0.848794	2.46698	1.80099	21	4
BRSK1_RAT	85130	23	1	1889	0.332	3.01205	0.404188	2.47406	1.30688	1.08	22	BRSK1_RAT	34	1	1418	85130	0.2873	3.48068	0.415083	2.40915	1.26853	1.072	23	BRSK1_RAT	38	1	1573	85130	0.2493	4.01123	0.459074	2.1783	1.1232	1.109	23	Serine/threonine-protein kinase BRSK1 OS=Rattus norvegicus GN=Brsk1 PE=1 SV=1	1.23287	0.0968917	2.35034	1.06947	22	22.6667
DCX_RAT	40534	24	3	207	0.4385	2.2805	0.533845	1.87317	0.905485	1.183	2	DCX_RAT	16	3	310	40534	0.2141	4.67071	0.309326	3.23284	1.6928	1.347	3	DCX_RAT	23	3	237	40534	0.2554	3.91543	0.470307	2.12627	1.08833	1.445	2	Neuronal migration protein doublecortin OS=Rattus norvegicus GN=Dcx PE=1 SV=2	1.22887	0.412045	2.34383	1.33057	23	2.33333
BRSK2_RAT	81403	23	2	365	0.3224	3.10174	0.392501	2.54773	1.34921	1.21	9	BRSK2_RAT	34	2	327	81403	0.3018	3.31345	0.436033	2.29341	1.19749	1.085	8	BRSK2_RAT	38	2	434	81403	0.2503	3.99521	0.460915	2.16959	1.11743	1.158	8	Serine/threonine-protein kinase BRSK2 OS=Rattus norvegicus GN=Brsk2 PE=1 SV=1	1.22138	0.117724	2.33169	1.08502	24	8.33333
ATPG_RAT	30172	215		329	0.5058	1.97707	0.615778	1.62394	0.699495	1.086	4	ATPG_RAT	157	0	437	30172	0.301	3.32226	0.434877	2.2995	1.20132	1.103	4	ATPG_RAT	201	0	404	30172	0.1731	5.77701	0.318755	3.1372	1.64948	1.305	6	ATP synthase subunit gamma, mitochondrial OS=Rattus norvegicus GN=Atp5c1 PE=1 SV=2	1.18343	0.475244	2.27116	1.39015	25	4.66667
DCLK2_RAT	83964	24	1	1872	0.3685	2.7137	0.448624	2.229	1.1564	1.067	21	DCLK2_RAT	16	1	2092	83964	0.2549	3.92311	0.368273	2.71538	1.44115	1.106	19	DCLK2_RAT	23	1	2078	83964	0.2933	3.40948	0.540098	1.85152	0.888706	1.073	22	Serine/threonine-protein kinase DCLK2 OS=Rattus norvegicus GN=Dclk2 PE=1 SV=2	1.16209	0.276267	2.23781	1.21106	26	20.6667
TBB4B_RAT	49769	14	3	2336	0.4985	2.00602	0.606891	1.64772	0.720468	1.133	5	TBB4B_RAT	15	2	2098	49769	0.3223	3.1027	0.465651	2.14753	1.10268	1.16	3	TBB4B_RAT	12	2	2852	49769	0.1788	5.59284	0.329251	3.03719	1.60274	1.222	5	Tubulin beta-4B chain OS=Rattus norvegicus GN=Tubb4b PE=1 SV=1	1.14196	0.442444	2.20681	1.3589	27	4.33333
TBB2B_RAT	49921	14	1	2600	0.4961	2.01572	0.603969	1.65569	0.727431	1.117	8	TBB2B_RAT	15	1	2348	49921	0.3082	3.24465	0.445279	2.24578	1.16722	1.275	6	TBB2B_RAT	12	1	3295	49921	0.1909	5.23834	0.351533	2.84468	1.50827	1.19	6	Tubulin beta-2B chain OS=Rattus norvegicus GN=Tubb2b PE=1 SV=1	1.13431	0.391457	2.19513	1.31172	28	6.66667
ACTG_RAT	41766	46	1	1287	0.3168	3.15657	0.385683	2.59276	1.37449	1.086	10	ACTG_RAT	32	1	1451	41766	0.3114	3.2113	0.449902	2.2227	1.15232	1.081	18	ACTG_RAT	40	1	1556	41766	0.3104	3.22165	0.571586	1.74951	0.806955	1.139	16	Actin, cytoplasmic 2 OS=Rattus norvegicus GN=Actg1 PE=1 SV=1	1.11125	0.285987	2.16033	1.21924	29	14.6667
ACTC_RAT	41992	46	2	793	0.3006	3.32668	0.365961	2.73249	1.45022	1.133	8	ACTC_RAT	32	3	841	41992	0.3059	3.26904	0.441956	2.26267	1.17802	1.071	11	ACTC_RAT	40	3	1053	41992	0.3454	2.89519	0.636037	1.57223	0.652815	1.173	10	Actin, alpha cardiac muscle 1 OS=Rattus norvegicus GN=Actc1 PE=2 SV=1	1.09369	0.405336	2.13419	1.3244	30	9.66667
BDH_RAT	38177	209		340	0.4416	2.26449	0.537619	1.86002	0.895321	1.236	4	BDH_RAT	175	0	368	38177	0.2933	3.40948	0.423752	2.35987	1.23871	1.238	4	BDH_RAT	307	0	242	38177	0.2495	4.00802	0.459442	2.17655	1.12204	1.204	3	D-beta-hydroxybutyrate dehydrogenase, mitochondrial OS=Rattus norvegicus GN=Bdh1 PE=1 SV=2	1.08536	0.174608	2.1219	1.12866	31	3.66667
GBB1_RAT	37353	203	1	357	0.3699	2.70343	0.450329	2.22056	1.15093	1.087	5	GBB1_RAT	163	1	423	37353	0.2129	4.69704	0.307592	3.25106	1.70091	1.225	5	GBB1_RAT	159	1	506	37353	0.4238	2.3596	0.780407	1.28138	0.3577	1.053	10	Guanine nucleotide-binding protein G(I)/G(S)/G(T) subunit beta-1 OS=Rattus norvegicus GN=Gnb1 PE=1 SV=4	1.06985	0.675265	2.09921	1.59689	32	6.66667
DCLK1_RAT	47651	24	2	1441	0.4278	2.33754	0.520818	1.92003	0.941125	1.059	13	DCLK1_RAT	16	2	1296	47651	0.2837	3.52485	0.409882	2.43973	1.28672	1.196	16	DCLK1_RAT	23	2	1776	47651	0.2758	3.62582	0.507872	1.969	0.977461	1.145	18	Serine/threonine-protein kinase DCLK1 OS=Rattus norvegicus GN=Dclk1 PE=1 SV=1	1.06843	0.18991	2.09716	1.14069	33	15.6667
UCRI_RAT	29427	251		283	0.4787	2.08899	0.582785	1.71587	0.77894	1.316	3	UCRI_RAT	337	0	183	29427	0.2963	3.37496	0.428086	2.33598	1.22403	1.747	2	UCRI_RAT	232	0	349	29427	0.2398	4.17014	0.44158	2.26459	1.17925	1.866	2	Cytochrome b-c1 complex subunit Rieske, mitochondrial OS=Rattus norvegicus GN=Uqcrfs1 PE=1 SV=2	1.06074	0.24507	2.086	1.18515	34	2.33333
LONP2_RAT	94334	159		454	0.3967	2.5208	0.482956	2.07055	1.05001	1.235	4	LONP2_RAT	180	0	360	94334	0.3263	3.06466	0.47143	2.12121	1.08489	1.352	4	LONP2_RAT	175	0	463	94334	0.2643	3.78358	0.486696	2.05467	1.03891	1.24	4	Lon protease homolog 2, peroxisomal OS=Rattus norvegicus GN=Lonp2 PE=1 SV=2	1.05794	0.0239912	2.08195	1.01677	35	4
PFKAM_RAT	85506	26	2	1107	0.408	2.45098	0.496713	2.0132	1.00949	1.037	19	PFKAM_RAT	26	2	1245	85506	0.29	3.44828	0.418984	2.38672	1.25503	1.052	19	PFKAM_RAT	26	2	1120	85506	0.2921	3.42349	0.537888	1.85912	0.894621	1.073	17	ATP-dependent 6-phosphofructokinase, muscle type OS=Rattus norvegicus GN=Pfkm PE=1 SV=3	1.05305	0.184111	2.07491	1.13612	36	18.3333
LYSM1_RAT	24863	267		261	0.6645	1.50489	0.808985	1.2361	0.305792	1.122	4	LYSM1_RAT	198	0	330	24863	0.3544	2.82167	0.512028	1.95302	0.965706	1.595	4	LYSM1_RAT	278	0	282	24863	0.1537	6.50618	0.283031	3.53318	1.82097	1.309	6	LysM and putative peptidoglycan-binding domain-containing protein 1 OS=Rattus norvegicus GN=Lysmd1 PE=1 SV=1	1.03082	0.759683	2.04319	1.69312	37	4.66667
TBB5_RAT	49639	14	4	1892	0.5165	1.93611	0.628804	1.59029	0.669293	1.137	5	TBB5_RAT	15	3	1790	49639	0.3622	2.76091	0.523297	1.91096	0.934298	1.345	3	TBB5_RAT	12	3	2397	49639	0.21	4.7619	0.386705	2.58595	1.37069	1.188	5	Tubulin beta-5 chain OS=Rattus norvegicus GN=Tubb5 PE=1 SV=1	0.991429	0.354173	1.98815	1.27825	38	4.33333
SAHH2_RAT	53719	410		137	0.3486	2.86862	0.424397	2.35624	1.23649	1.23	2	SAHH2_RAT	444	0	112	53719	0.2924	3.41997	0.422452	2.36713	1.24314	1.057	3	SAHH2_RAT	440	0	148	53719	0.3944	2.5355	0.726268	1.3769	0.461424	1.146	2	Adenosylhomocysteinase 2 OS=Rattus norvegicus GN=Ahcyl1 PE=1 SV=2	0.980352	0.449417	1.97295	1.36549	39	2.33333
GBB2_RAT	37307	203	2	167	0.3814	2.62192	0.464329	2.15361	1.10676	1.084	4	GBB2_RAT	163	2	315	37307	0.2533	3.94789	0.365961	2.73253	1.45024	1.26	4	GBB2_RAT	159	2	281	37307	0.4187	2.38834	0.771016	1.29699	0.375167	1.139	8	Guanine nucleotide-binding protein G(I)/G(S)/G(T) subunit beta-2 OS=Rattus norvegicus GN=Gnb2 PE=1 SV=4	0.977387	0.549087	1.9689	1.46316	40	5.33333
TBB3_RAT	50386	14	5	1868	0.5563	1.79759	0.677258	1.47652	0.562199	1.138	5	TBB3_RAT	15	4	1662	50386	0.4179	2.39292	0.603771	1.65626	0.727927	1.447	3	TBB3_RAT	12	4	2265	50386	0.1824	5.48246	0.335881	2.97724	1.57398	1.261	3	Tubulin beta-3 chain OS=Rattus norvegicus GN=Tubb3 PE=1 SV=1	0.954701	0.542673	1.93818	1.45667	41	3.66667
GNAI1_RAT	40319	117	2	296	0.461	2.1692	0.561237	1.78175	0.833295	1.136	2	GNAI1_RAT	64	3	324	40319	0.3668	2.72628	0.529943	1.887	0.916091	1.025	2	GNAI1_RAT	93	2	536	40319	0.2663	3.75516	0.490378	2.03924	1.02803	1.341	5	Guanine nucleotide-binding protein G(i) subunit alpha-1 OS=Rattus norvegicus GN=Gnai1 PE=1 SV=3	0.925806	0.0977309	1.89974	1.07009	42	3
CDK5_RAT	33233	332		195	0.4244	2.35627	0.516679	1.93541	0.952637	1.135	5	CDK5_RAT	242	0	279	33233	0.3523	2.83849	0.508994	1.96466	0.97428	1.141	7	CDK5_RAT	231	0	350	33233	0.3042	3.28731	0.560169	1.78517	0.836063	1.163	5	Cyclin-dependent-like kinase 5 OS=Rattus norvegicus GN=Cdk5 PE=1 SV=1	0.920994	0.0743435	1.89342	1.05288	43	5.66667
DPYL2_RAT	62239	30	1	1649	0.3586	2.78862	0.436572	2.29054	1.19569	1.278	17	DPYL2_RAT	22	1	1740	62239	0.322	3.10559	0.465217	2.14953	1.10402	1.17	12	DPYL2_RAT	35	1	1651	62239	0.4104	2.43665	0.755732	1.32322	0.404053	1.194	15	Dihydropyrimidinase-related protein 2 OS=Rattus norvegicus GN=Dpysl2 PE=1 SV=1	0.901254	0.433021	1.86769	1.35006	44	14.6667
HCD2_RAT	27229	134		550	0.4907	2.03791	0.597395	1.67391	0.74322	1.093	5	HCD2_RAT	114	0	577	27229	0.3236	3.09023	0.467529	2.13891	1.09687	1.077	7	HCD2_RAT	111	0	670	27229	0.308	3.24675	0.567167	1.76315	0.818153	1.129	8	3-hydroxyacyl-CoA dehydrogenase type-2 OS=Rattus norvegicus GN=Hsd17b10 PE=1 SV=3	0.886082	0.186355	1.84815	1.13789	45	6.66667
NDRG2_RAT	40753	342		186	0.5136	1.94704	0.625274	1.59927	0.677416	1.19	3	NDRG2_RAT	311	0	204	40753	0.3681	2.71665	0.531821	1.88033	0.910987	1.041	2	NDRG2_RAT	282	0	277	40753	0.2765	3.61664	0.509161	1.96401	0.973804	1.203	3	Protein NDRG2 OS=Rattus norvegicus GN=Ndrg2 PE=1 SV=1	0.854069	0.156177	1.80759	1.11433	46	2.66667
PFKAL_RAT	85284	26	3	822	0.4688	2.13311	0.570733	1.7521	0.809089	1.084	9	PFKAL_RAT	26	3	868	85284	0.3225	3.10078	0.465939	2.1462	1.10179	1.169	9	PFKAL_RAT	26	3	763	85284	0.3461	2.88934	0.637326	1.56905	0.649895	1.107	9	ATP-dependent 6-phosphofructokinase, liver type OS=Rattus norvegicus GN=Pfkl PE=1 SV=3	0.85359	0.229209	1.80699	1.17219	47	9
SDHA_RAT	71570	148		493	0.4914	2.035	0.598247	1.67152	0.741164	1.102	11	SDHA_RAT	138	0	497	71570	0.3532	2.83126	0.510294	1.95965	0.970599	1.098	8	SDHA_RAT	149	0	523	71570	0.3072	3.25521	0.565694	1.76774	0.821905	1.068	11	Succinate dehydrogenase [ubiquinone] flavoprotein subunit, mitochondrial OS=Rattus norvegicus GN=Sdha PE=1 SV=1	0.844556	0.116383	1.79571	1.08401	48	10
SRCN1_RAT	129665	8		4872	0.4596	2.17581	0.559533	1.78718	0.837683	1.04	46	SRCN1_RAT	10	0	3803	129665	0.4367	2.2899	0.630933	1.58496	0.664442	1.069	38	SRCN1_RAT	5	0	5420	129665	0.2817	3.54988	0.518737	1.92776	0.946924	1.07	47	SRC kinase signaling inhibitor 1 OS=Rattus norvegicus GN=Srcin1 PE=1 SV=1	0.81635	0.142444	1.76094	1.10377	49	43.6667
AT2A2_RAT	114694	90		746	0.2372	4.21585	0.288775	3.46284	1.79196	1.121	4	AT2A2_RAT	105	0	632	114694	0.6686	1.49566	0.965976	1.03522	0.0499414	1.462	4	AT2A2_RAT	89	0	798	114694	0.3814	2.62192	0.702329	1.42383	0.509779	1.238	8	Sarcoplasmic/endoplasmic reticulum calcium ATPase 2 OS=Rattus norvegicus GN=Atp2a2 PE=1 SV=1	0.783893	0.902778	1.72177	1.86966	50	5.33333
EAA2_RAT	62066	61		1040	0.4483	2.23065	0.545776	1.83223	0.873597	1.138	8	EAA2_RAT	73	0	816	62066	0.363	2.75482	0.524453	1.90675	0.931115	1.194	6	EAA2_RAT	48	0	1341	62066	0.3791	2.63783	0.698094	1.43247	0.518505	1.229	5	Excitatory amino acid transporter 2 OS=Rattus norvegicus GN=Slc1a2 PE=1 SV=2	0.774406	0.223475	1.71049	1.16754	51	6.33333
GNAI2_RAT	40473	117	4	259	0.5892	1.69722	0.717312	1.39407	0.479304	1.06	2	GNAI2_RAT	64	2	356	40473	0.3962	2.52398	0.572419	1.74697	0.804856	1.113	2	GNAI2_RAT	93	3	367	40473	0.2663	3.75516	0.490378	2.03924	1.02803	1.419	4	Guanine nucleotide-binding protein G(i) subunit alpha-2 OS=Rattus norvegicus GN=Gnai2 PE=1 SV=3	0.77073	0.275951	1.70613	1.21079	52	2.66667
NECA1_RAT	40878	343		184	0.4007	2.49563	0.487826	2.04988	1.03554	1.128	3	NECA1_RAT	239	0	285	40878	0.5791	1.72682	0.836668	1.19522	0.257272	1.253	3	NECA1_RAT	343	0	206	40878	0.2818	3.54862	0.518921	1.92707	0.946412	1.216	2	N-terminal EF-hand calcium-binding protein 1 OS=Rattus norvegicus GN=Necab1 PE=1 SV=1	0.746408	0.425941	1.67761	1.34345	53	2.66667
SV2A_RAT	82608	144		509	0.4681	2.1363	0.569881	1.75472	0.811245	1.081	6	SV2A_RAT	111	0	607	82608	0.4425	2.25989	0.639312	1.56418	0.645407	1.185	7	SV2A_RAT	143	0	566	82608	0.3376	2.96209	0.621674	1.60856	0.685769	1.316	4	Synaptic vesicle glycoprotein 2A OS=Rattus norvegicus GN=Sv2a PE=1 SV=2	0.71414	0.0864826	1.64051	1.06178	54	5.66667
IDH3B_RAT	42327	69		992	0.6078	1.64528	0.739956	1.35141	0.434465	1.073	14	IDH3B_RAT	56	0	987	42327	0.444	2.25225	0.641479	1.5589	0.640525	1.126	15	IDH3B_RAT	68	0	1053	42327	0.2722	3.67377	0.501243	1.99504	0.996416	1.171	15	Isocitrate dehydrogenase [NAD] subunit beta, mitochondrial OS=Rattus norvegicus GN=Idh3B PE=2 SV=1	0.690469	0.284285	1.61381	1.21781	55	14.6667
GBB5_RAT	38707	463		112	0.6347	1.57555	0.772705	1.29413	0.371987	1.07	2	GBB5_RAT	217	0	309	38707	0.4256	2.34962	0.614896	1.62629	0.701587	1.1983	4	GBB5_RAT	222	0	372	38707	0.2778	3.59971	0.511555	1.95482	0.967037	1.2938	2	Guanine nucleotide-binding protein subunit beta-5 OS=Rattus norvegicus GN=Gnb5 PE=2 SV=1	0.680203	0.298101	1.60237	1.22952	56	2.66667
EF1A2_RAT	50422	136	1	548	0.6213	1.60953	0.756392	1.32205	0.402772	1.112	3	EF1A2_RAT	122	1	550	50422	0.4232	2.36295	0.611428	1.63552	0.709745	1.099	3	EF1A2_RAT	118	1	632	50422	0.2912	3.43407	0.536231	1.86487	0.899073	1.347	2	Elongation factor 1-alpha 2 OS=Rattus norvegicus GN=Eef1a2 PE=1 SV=1	0.67053	0.250464	1.59166	1.18959	57	2.66667
STAU2_RAT	62642	171		424	0.447	2.23714	0.544193	1.83755	0.877787	1.038	3	STAU2_RAT	179	0	362	62642	0.3656	2.73523	0.528209	1.89319	0.920819	1.282	3	STAU2_RAT	186	0	441	62642	0.4742	2.10881	0.873216	1.14519	0.195588	1.105	5	Double-stranded RNA-binding protein Staufen homolog 2 OS=Rattus norvegicus GN=Stau2 PE=1 SV=1	0.664731	0.406859	1.58527	1.3258	58	3.66667
CEND_RAT	15034	645		55	0.5072	1.97161	0.617482	1.61945	0.695507	1.183	2	CEND_RAT	498	0	92	15034	0.4836	2.06782	0.698692	1.43124	0.51727	1.069	2	CEND_RAT	409	0	161	15034	0.3218	3.10752	0.592579	1.68754	0.754919	1.079	2	Cell cycle exit and neuronal differentiation protein 1 OS=Rattus norvegicus GN=Cend1 PE=1 SV=1	0.655899	0.123676	1.5756	1.08951	59	2
TBA1A_RAT	50104	19	1	2099	0.6251	1.59974	0.761018	1.31401	0.393975	1.184	6	TBA1A_RAT	13	1	2382	50104	0.4121	2.4266	0.595391	1.67957	0.74809	1.159	5	TBA1A_RAT	20	1	2281	50104	0.3163	3.16156	0.582451	1.71688	0.77979	1.271	6	Tubulin alpha-1A chain OS=Rattus norvegicus GN=Tuba1a PE=1 SV=1	0.640618	0.214187	1.559	1.16005	60	5.66667
ACSL6_RAT	78130	149		492	0.5453	1.83385	0.663867	1.5063	0.591012	1.035	7	ACSL6_RAT	227	0	299	78130	0.4243	2.35682	0.613017	1.63128	0.706	1.149	7	ACSL6_RAT	169	1	471	78130	0.3524	2.83768	0.648927	1.541	0.62387	1.071	5	Long-chain-fatty-acid--CoA ligase 6 OS=Rattus norvegicus GN=Acsl6 PE=1 SV=1	0.640294	0.0592276	1.55865	1.04191	61	6.33333
MK01_RAT	41249	177		416	0.5533	1.80734	0.673606	1.48452	0.57	1.145	7	MK01_RAT	141	1	487	41249	0.4109	2.43368	0.593657	1.68447	0.752297	1.047	7	MK01_RAT	177	0	456	41249	0.3624	2.75938	0.667342	1.49848	0.583501	1.093	8	Mitogen-activated protein kinase 1 OS=Rattus norvegicus GN=Mapk1 PE=1 SV=3	0.635266	0.101577	1.55322	1.07295	62	7.33333
GLNA_RAT	42240	150		491	0.474	2.1097	0.577064	1.73288	0.793175	1.104	7	GLNA_RAT	71	0	829	42240	0.3694	2.70709	0.533699	1.87371	0.905901	1.073	9	GLNA_RAT	117	0	641	42240	0.4815	2.07684	0.886659	1.12783	0.173548	1.148	8	Glutamine synthetase OS=Rattus norvegicus GN=Glul PE=1 SV=3	0.624208	0.394332	1.54136	1.31433	63	8
EF2_RAT	95223	202		361	0.689	1.45138	0.838812	1.19214	0.253558	1.097	5	EF2_RAT	136	0	499	95223	0.2171	4.60617	0.31366	3.18816	1.67272	1.936	3	EF2_RAT	113	0	664	95223	0.5669	1.76398	1.04392	0.957928	-0.0620107	1.107	7	Elongation factor 2 OS=Rattus norvegicus GN=Eef2 PE=1 SV=4	0.621424	0.924024	1.53839	1.8974	64	5
INP5E_RAT	72193	127		572	0.4492	2.22618	0.546871	1.82855	0.870704	1.209	3	INP5E_RAT	183	0	356	72193	0.4519	2.21288	0.652893	1.53164	0.615081	1.248	3	INP5E_RAT	208	0	394	72193	0.4184	2.39006	0.770463	1.29792	0.376201	1.279	2	72 kDa inositol polyphosphate 5-phosphatase OS=Rattus norvegicus GN=Inpp5e PE=1 SV=2	0.620662	0.247299	1.53758	1.18698	65	2.66667
GNAO_RAT	40043	117	1	612	0.5648	1.77054	0.687607	1.4543	0.540322	1.097	8	GNAO_RAT	64	1	896	40043	0.4378	2.28415	0.632522	1.58097	0.660813	1.041	9	GNAO_RAT	93	1	774	40043	0.3481	2.87274	0.641009	1.56004	0.641582	1.09	9	Guanine nucleotide-binding protein G(o) subunit alpha OS=Rattus norvegicus GN=Gnao1 PE=1 SV=2	0.614239	0.0647322	1.53075	1.04589	66	8.66667
PFKAP_RAT	85665	26	1	1776	0.5371	1.86185	0.653884	1.5293	0.612871	1.065	21	PFKAP_RAT	26	1	1562	85665	0.3886	2.57334	0.561439	1.78114	0.832799	1.058	24	PFKAP_RAT	26	1	1888	85665	0.4127	2.42307	0.759967	1.31585	0.39599	1.045	24	ATP-dependent 6-phosphofructokinase, platelet type OS=Rattus norvegicus GN=Pfkp PE=1 SV=2	0.613887	0.218406	1.53038	1.16345	67	23
ARFG3_RAT	57635	450		118	0.6845	1.46092	0.833333	1.19998	0.263011	1.027	2	ARFG3_RAT	293	0	224	57635	0.3338	2.99581	0.482265	2.07355	1.0521	1.055	2	ARFG3_RAT	321	0	228	57635	0.3822	2.61643	0.703803	1.42085	0.506756	1.084	2	ADP-ribosylation factor GTPase-activating protein 3 OS=Rattus norvegicus GN=Arfgap3 PE=1 SV=1	0.607289	0.404037	1.52339	1.32321	68	2
MAST1_RAT	170923	104	1	680	0.5942	1.68294	0.723399	1.38234	0.467113	1.075	7	MAST1_RAT	110	0	609	170923	0.3713	2.69324	0.536444	1.86413	0.898499	1.299	5	MAST1_RAT	128	1	609	170923	0.4091	2.44439	0.753338	1.32742	0.40863	1.055	8	Microtubule-associated serine/threonine-protein kinase 1 OS=Rattus norvegicus GN=Mast1 PE=1 SV=1	0.591414	0.267546	1.50672	1.20376	69	6.66667
SNP25_RAT	23300	232		308	0.553	1.80832	0.673241	1.48533	0.570782	1.164	4	SNP25_RAT	155	0	448	23300	0.4615	2.16685	0.666763	1.49978	0.584754	1.121	6	SNP25_RAT	261	0	294	23300	0.3643	2.74499	0.670841	1.49067	0.575957	1.201	4	Synaptosomal-associated protein 25 OS=Rattus norvegicus GN=Snap25 PE=1 SV=1	0.577164	0.00706381	1.49191	1.00491	70	4.66667
MINK1_RAT	150289	64		1021	0.5543	1.80408	0.674823	1.48185	0.567395	1.106	11	MINK1_RAT	78	0	798	150289	0.4743	2.10837	0.685256	1.45931	0.545285	1.095	16	MINK1_RAT	61	0	1115	150289	0.3777	2.6476	0.695516	1.43778	0.523843	1.095	15	Misshapen-like kinase 1 OS=Rattus norvegicus GN=Mink1 PE=1 SV=2	0.545507	0.0217768	1.45953	1.01521	71	14
MBP_RAT	21489	17		2411	0.6326	1.58078	0.770149	1.29843	0.376768	1.416	12	MBP_RAT	14	0	2379	21489	0.4471	2.23664	0.645958	1.54809	0.630487	1.329	12	MBP_RAT	19	0	2369	21489	0.3543	2.82247	0.652426	1.53274	0.616112	1.432	12	Myelin basic protein OS=Rattus norvegicus GN=Mbp PE=1 SV=3	0.541122	0.142516	1.4551	1.10383	72	12
TAU_RAT	78516	278		248	0.6077	1.64555	0.739834	1.35163	0.434702	1.273	3	TAU_RAT	301	0	218	78516	0.4831	2.06996	0.69797	1.43273	0.518763	1.13	4	TAU_RAT	254	0	303	78516	0.3449	2.89939	0.635116	1.57451	0.654905	1.068	3	Microtubule-associated protein tau OS=Rattus norvegicus GN=Mapt PE=1 SV=3	0.536124	0.111123	1.45007	1.08007	73	3.33333
SEPT5_RAT	42825	415		135	0.5131	1.94894	0.624665	1.60083	0.678822	1.192	4	SEPT5_RAT	286	0	231	42825	0.4247	2.3546	0.613595	1.62974	0.704641	1.042	5	SEPT5_RAT	380	0	179	42825	0.4712	2.12224	0.867692	1.15248	0.204744	1.142	2	Septin-5 OS=Rattus norvegicus GN=Sept5 PE=1 SV=2	0.529402	0.281458	1.44333	1.21542	74	3.66667
BCAS1_RAT	58588	206		342	0.5714	1.75009	0.695642	1.4375	0.523561	1.086	3	BCAS1_RAT	182	0	357	58588	0.5139	1.9459	0.742469	1.34686	0.429597	1.122	4	BCAS1_RAT	277	0	283	58588	0.378	2.6455	0.696069	1.43664	0.522697	1.118	7	Breast carcinoma-amplified sequence 1 homolog (Fragment) OS=Rattus norvegicus GN=Bcas1 PE=1 SV=2	0.491952	0.0540024	1.40635	1.03814	75	4.66667
S12A5_RAT	126165	65		1018	0.4741	2.10926	0.577185	1.73252	0.79287	1.053	11	S12A5_RAT	77	0	803	126165	0.571	1.75131	0.824966	1.21217	0.277594	1.042	10	S12A5_RAT	72	0	959	126165	0.414	2.41546	0.762361	1.31171	0.391453	1.03	10	Solute carrier family 12 member 5 OS=Rattus norvegicus GN=Slc12a5 PE=1 SV=2	0.487306	0.270681	1.40182	1.20638	76	10.3333
GRPE1_RAT	24282	197		368	0.676	1.47929	0.822985	1.21507	0.281038	1.086	10	GRPE1_RAT	120	0	551	24282	0.4707	2.1245	0.680055	1.47047	0.556277	1.101	11	GRPE1_RAT	96	0	758	24282	0.3682	2.71592	0.678022	1.47488	0.560594	1.061	11	GrpE protein homolog 1, mitochondrial OS=Rattus norvegicus GN=Grpel1 PE=1 SV=2	0.46597	0.16017	1.38125	1.11742	77	10.6667
ECHA_RAT	82613	83		810	0.6254	1.59898	0.761383	1.31338	0.393282	1.056	13	ECHA_RAT	54	0	1000	82613	0.4472	2.23614	0.646103	1.54774	0.630165	1.055	12	ECHA_RAT	52	0	1266	82613	0.4229	2.36463	0.77875	1.28411	0.360767	1.029	16	Trifunctional enzyme subunit alpha, mitochondrial OS=Rattus norvegicus GN=Hadha PE=1 SV=2	0.461405	0.147052	1.37688	1.1073	78	13.6667
MYPR_RAT	30057	308		213	0.6118	1.63452	0.744826	1.34257	0.425002	1.102	3	MYPR_RAT	300	0	219	30057	0.5046	1.98177	0.729033	1.37168	0.455945	1.068	3	MYPR_RAT	324	0	226	30057	0.3943	2.53614	0.726084	1.37725	0.46179	1.254	2	Myelin proteolipid protein OS=Rattus norvegicus GN=Plp1 PE=1 SV=2	0.447579	0.0197696	1.36375	1.0138	79	2.66667
DLGP2_RAT	118903	96	1	714	0.6032	1.65782	0.734356	1.36172	0.445425	1.101	7	DLGP2_RAT	168	2	355	118903	0.4164	2.40154	0.601604	1.66222	0.733115	1.405	3	DLGP2_RAT	125	1	615	118903	0.4903	2.03957	0.902863	1.10759	0.147419	1.208	3	Disks large-associated protein 2 OS=Rattus norvegicus GN=Dlgap2 PE=1 SV=3	0.441986	0.292863	1.35847	1.22507	80	4.33333
PRPS1_RAT	34812	243		294	0.6079	1.64501	0.740078	1.35119	0.434228	1.092	5	PRPS1_RAT	196	0	333	34812	0.4379	2.28363	0.632666	1.58061	0.660483	1.102	2	PRPS1_RAT	306	0	246	34812	0.4763	2.09952	0.877083	1.14014	0.189213	1.171	2	Ribose-phosphate pyrophosphokinase 1 OS=Rattus norvegicus GN=Prps1 PE=1 SV=2	0.427975	0.235697	1.34534	1.17748	81	3
WASF1_RAT	61477	154		477	0.5731	1.7449	0.697711	1.43323	0.519275	1.273	3	WASF1_RAT	162	0	423	61477	0.4825	2.07254	0.697103	1.43451	0.520556	1.282	3	WASF1_RAT	184	0	443	61477	0.4704	2.12585	0.866219	1.15444	0.207195	1.421	3	Wiskott-Aldrich syndrome protein family member 1 OS=Rattus norvegicus GN=Wasf1 PE=1 SV=1	0.415675	0.18055	1.33392	1.13332	82	3
SEPT3_RAT	40572	353		174	0.648	1.54321	0.788897	1.26757	0.342068	1.057	4	SEPT3_RAT	462	0	103	40572	0.5207	1.92049	0.752294	1.32927	0.410632	1.106	3	SEPT3_RAT	325	0	226	40572	0.39	2.5641	0.718166	1.39243	0.477609	1.031	3	Neuronal-specific septin-3 OS=Rattus norvegicus GN=Sept3 PE=1 SV=2	0.410103	0.0677723	1.32878	1.0481	83	3.33333
RL11_RAT	20240	406		141	0.6728	1.48633	0.819089	1.22085	0.287884	1.247	2	RL11_RAT	12	2	277	20240	0.557	1.79533	0.804739	1.24264	0.313407	1.108	4	RL11_RAT	179	0	447	20240	0.3567	2.80348	0.656846	1.52243	0.606372	1.03	3	60S ribosomal protein L11 OS=Rattus norvegicus GN=Rpl11 PE=1 SV=2	0.402555	0.176972	1.32185	1.13051	84	3
TRIM9_RAT	79155	138		537	0.5776	1.7313	0.70319	1.42207	0.507991	1.267	4	TRIM9_RAT	129	0	525	79155	0.4508	2.21828	0.651304	1.53538	0.618597	1.312	4	TRIM9_RAT	141	0	569	79155	0.5155	1.93986	0.949268	1.05344	0.0751111	1.135	3	E3 ubiquitin-protein ligase TRIM9 OS=Rattus norvegicus GN=Trim9 PE=1 SV=1	0.400566	0.287227	1.32003	1.22029	85	3.66667
AT2B2_RAT	136724	50	2	1095	0.5854	1.70823	0.712686	1.40312	0.488639	1.1	12	AT2B2_RAT	53	2	973	136724	0.598	1.67224	0.863975	1.15744	0.210939	1.046	12	AT2B2_RAT	49	2	1269	136724	0.4135	2.41838	0.76144	1.3133	0.393196	1.098	16	Plasma membrane calcium-transporting ATPase 2 OS=Rattus norvegicus GN=Atp2b2 PE=1 SV=2	0.364258	0.141093	1.28722	1.10274	86	13.3333
PHB2_RAT	33292	326		200	0.5377	1.85977	0.654614	1.52759	0.61126	1.082	4	PHB2_RAT	292	0	224	33292	0.5063	1.97511	0.731489	1.36707	0.451092	1.087	4	PHB2_RAT	226	0	358	33292	0.5436	1.83959	1.00101	0.998987	-0.0014619	1.042	2	Prohibitin-2 OS=Rattus norvegicus GN=Phb2 PE=1 SV=1	0.35363	0.317775	1.27777	1.24641	87	3.33333
RP3A_RAT	75785	49		1254	0.6241	1.60231	0.7598	1.31611	0.396284	1.065	17	RP3A_RAT	37	0	1345	75785	0.4812	2.07814	0.695225	1.43838	0.524448	1.074	21	RP3A_RAT	57	0	1189	75785	0.4939	2.0247	0.909493	1.09951	0.136865	1.098	20	Rabphilin-3A OS=Rattus norvegicus GN=Rph3a PE=1 SV=1	0.352532	0.197461	1.2768	1.14668	88	19.3333
SYYC_RAT	59078	106		667	0.6171	1.62048	0.751278	1.33104	0.412557	1.046	8	SYYC_RAT	139	0	492	59078	0.4943	2.02306	0.714152	1.40026	0.485698	1.081	6	SYYC_RAT	172	0	465	59078	0.4959	2.01654	0.913176	1.09508	0.131034	1.081	6	Tyrosine--tRNA ligase, cytoplasmic OS=Rattus norvegicus GN=Yars PE=2 SV=3	0.343097	0.187257	1.26848	1.1386	89	6.66667
DPYL1_RAT	62157	30	2	1285	0.5137	1.94666	0.625396	1.59896	0.677136	1.396	10	DPYL1_RAT	22	2	957	62157	0.4684	2.13493	0.676732	1.47769	0.563344	1.27	8	DPYL1_RAT	35	2	912	62157	0.6292	1.58932	1.15864	0.863079	-0.212435	1.201	9	Dihydropyrimidinase-related protein 1 OS=Rattus norvegicus GN=Crmp1 PE=1 SV=1	0.342681	0.4841	1.26811	1.39871	90	9
CPT1A_RAT	88069	193		390	0.7412	1.34916	0.902362	1.10819	0.148199	1.033	2	CPT1A_RAT	143	1	473	88069	0.4296	2.32775	0.620675	1.61115	0.688091	1.282	6	CPT1A_RAT	157	0	510	88069	0.4791	2.08725	0.882239	1.13348	0.180757	1.096	3	Carnitine O-palmitoyltransferase 1, liver isoform OS=Rattus norvegicus GN=Cpt1a PE=1 SV=2	0.339015	0.302746	1.26489	1.23349	91	3.66667
MAP4_RAT	110233	32		1566	0.6516	1.53468	0.79328	1.26057	0.334075	1.094	11	MAP4_RAT	42	0	1235	110233	0.5682	1.75994	0.82092	1.21815	0.284686	1.087	11	MAP4_RAT	36	0	1644	110233	0.4231	2.36351	0.779118	1.2835	0.360085	1.105	11	Microtubule-associated protein 4 OS=Rattus norvegicus GN=Map4 PE=1 SV=1	0.326282	0.0382988	1.25378	1.0269	92	11
SYN1_RAT	73943	183	2	382	1.354	0.738552	1.64841	0.606637	-0.721094	1.841	2	SYN1_RAT	102	1	653	73943	0.4933	2.02716	0.712707	1.4031	0.488619	1.384	4	SYN1_RAT	108	1	686	73943	0.2477	4.03714	0.456127	2.19237	1.13249	1.095	5	Synapsin-1 OS=Rattus norvegicus GN=Syn1 PE=1 SV=3	0.300005	0.941076	1.23115	1.91996	93	3.66667
NUMBL_RAT	65472	161	1	442	0.6185	1.61681	0.752983	1.32803	0.409288	1.113	5	NUMBL_RAT	169	1	390	65472	0.5373	1.86116	0.776277	1.2882	0.365357	1.114	3	NUMBL_RAT	191	1	438	65472	0.5073	1.97122	0.934168	1.07047	0.0982444	1.059	4	Numb-like protein OS=Rattus norvegicus GN=Numbl PE=1 SV=1	0.290963	0.168339	1.22346	1.12376	94	4
PGAM5_RAT	32041	349		181	0.7551	1.32433	0.919284	1.08779	0.121394	1.085	4	PGAM5_RAT	343	0	173	32041	0.607	1.64745	0.876978	1.14028	0.189388	1.122	3	PGAM5_RAT	262	0	294	32041	0.37	2.7027	0.681337	1.4677	0.553558	1.099	8	Serine/threonine-protein phosphatase PGAM5, mitochondrial OS=Rattus norvegicus GN=Pgam5 PE=2 SV=1	0.288113	0.232382	1.22104	1.17477	95	5
GTPB1_RAT	72443	225		314	0.5933	1.68549	0.722303	1.38444	0.4693	1.201	3	GTPB1_RAT	212	0	312	72443	0.4888	2.04583	0.706205	1.41602	0.50184	1.168	2	GTPB1_RAT	148	0	535	72443	0.6062	1.64962	1.11629	0.895826	-0.15871	1.656	3	GTP-binding protein 1 OS=Rattus norvegicus GN=Gtpbp1 PE=1 SV=1	0.27081	0.372331	1.20649	1.29444	96	2.66667
GPM6A_RAT	31174	421		132	0.7443	1.34354	0.906136	1.10357	0.142177	1.122	2	GPM6A_RAT	338	0	182	31174	0.5304	1.88537	0.766308	1.30496	0.384004	1.157	2	GPM6A_RAT	479	0	124	31174	0.4543	2.20119	0.836571	1.19535	0.257438	1.106	2	Neuronal membrane glycoprotein M6-a OS=Rattus norvegicus GN=Gpm6a PE=1 SV=1	0.261207	0.120957	1.19848	1.08746	97	2
PURA_RAT	15313	145		508	0.6457	1.54871	0.786097	1.27209	0.347198	1.096	6	PURA_RAT	89	0	714	15313	0.6396	1.56348	0.924077	1.08216	0.113915	1.134	6	PURA_RAT	104	0	698	15313	0.4484	2.23015	0.825707	1.21108	0.276297	1.407	9	Transcriptional activator protein Pur-alpha (Fragments) OS=Rattus norvegicus GN=Pura PE=1 SV=1	0.245803	0.119594	1.18575	1.08643	98	7
RL21_RAT	18454	254		280	0.6922	1.44467	0.842708	1.18663	0.246873	1.092	2	RL21_RAT	258	0	259	18454	0.6701	1.49231	0.968143	1.03291	0.0467083	1.031	3	RL21_RAT	378	0	180	18454	0.4108	2.43427	0.756468	1.32193	0.402647	1.092	4	60S ribosomal protein L21 OS=Rattus norvegicus GN=Rpl21 PE=1 SV=3	0.232076	0.17843	1.17452	1.13165	99	3
DDX1_RAT	82445	34		1547	0.9232	1.08319	1.12393	0.889717	-0.168582	1.055	20	DDX1_RAT	43	0	1228	82445	0.532	1.8797	0.76862	1.30103	0.379658	1.059	20	DDX1_RAT	33	0	1712	82445	0.4006	2.49626	0.737685	1.35559	0.438921	1.043	19	ATP-dependent RNA helicase DDX1 OS=Rattus norvegicus GN=Ddx1 PE=1 SV=1	0.216666	0.334947	1.16205	1.26133	100	19.6667
ROGDI_RAT	32185	261		275	0.6223	1.60694	0.757609	1.31992	0.400451	1.097	5	ROGDI_RAT	240	0	280	32185	0.6229	1.60539	0.899949	1.11117	0.152084	1.019	3	ROGDI_RAT	250	0	305	32185	0.5184	1.92901	0.954608	1.04755	0.0670178	1.085	3	Protein rogdi homolog OS=Rattus norvegicus GN=Rogdi PE=2 SV=1	0.206518	0.173253	1.1539	1.1276	101	3.66667
NSF_RAT	82600	33		1562	0.7389	1.35336	0.899562	1.11163	0.152683	1.04	27	NSF_RAT	31	0	1464	82600	0.5207	1.92049	0.752294	1.32927	0.410632	1.048	34	NSF_RAT	46	0	1389	82600	0.5299	1.88715	0.975785	1.02481	0.0353634	1.053	28	Vesicle-fusing ATPase OS=Rattus norvegicus GN=Nsf PE=1 SV=1	0.199559	0.191976	1.14835	1.14233	102	29.6667
RS3_RAT	26657	31		1580	1.171	0.853971	1.42561	0.70144	-0.511608	1.116	18	RS3_RAT	28	0	1490	26657	0.9409	1.06281	1.35939	0.735625	-0.442957	1.101	19	RS3_RAT	21	0	2184	26657	0.1883	5.31067	0.346745	2.88396	1.52805	1.832	23	40S ribosomal protein S3 OS=Rattus norvegicus GN=Rps3 PE=1 SV=1	0.191162	1.15829	1.14168	2.23192	103	20
1433G_RAT	28285	95	4	332	0.8301	1.20467	1.01059	0.989503	-0.0152235	1.104	5	1433G_RAT	86	4	403	28285	0.6111	1.63639	0.882901	1.13263	0.179676	1.243	9	1433G_RAT	120	3	479	28285	0.4125	2.42424	0.759599	1.31648	0.396689	1.606	8	14-3-3 protein gamma OS=Rattus norvegicus GN=Ywhag PE=1 SV=2	0.187047	0.206055	1.13843	1.15353	104	7.33333
VDAC3_RAT	30778	182	2	338	0.6161	1.62311	0.750061	1.3332	0.414897	1.145	5	VDAC3_RAT	213	2	289	30778	0.6047	1.65371	0.873655	1.14462	0.194865	1.305	3	VDAC3_RAT	126	2	328	30778	0.5633	1.77525	1.03729	0.96405	-0.0528199	1.193	4	Voltage-dependent anion-selective channel protein 3 OS=Rattus norvegicus GN=Vdac3 PE=1 SV=2	0.185647	0.233995	1.13733	1.17609	105	4
GIT1_RAT	85178	305		217	0.7112	1.40607	0.865839	1.15493	0.207806	1.045	5	GIT1_RAT	216	0	310	85178	0.6341	1.57704	0.916131	1.09155	0.126374	1.069	6	GIT1_RAT	349	0	198	85178	0.4684	2.13493	0.862536	1.15937	0.213342	1.143	2	ARF GTPase-activating protein GIT1 OS=Rattus norvegicus GN=Git1 PE=1 SV=1	0.182508	0.0486917	1.13485	1.03433	106	4.33333
ATAT_RAT	47298	142		522	0.7202	1.3885	0.876796	1.1405	0.189664	1.06	14	ATAT_RAT	112	0	594	47298	0.5683	1.75963	0.821065	1.21793	0.284432	1.065	12	ATAT_RAT	88	0	804	47298	0.5239	1.90876	0.964736	1.03655	0.0517921	1.081	12	Alpha-tubulin N-acetyltransferase 1 OS=Rattus norvegicus GN=Atat1 PE=1 SV=1	0.175296	0.116984	1.1292	1.08447	107	12.6667
DGKB_RAT	90229	204		353	0.6384	1.56642	0.77721	1.28663	0.363601	1.024	3	DGKB_RAT	194	0	338	90229	0.7072	1.41403	1.02174	0.978719	-0.0310336	1.173	3	DGKB_RAT	253	1	303	90229	0.4855	2.05973	0.894024	1.11854	0.161612	1.012	2	Diacylglycerol kinase beta OS=Rattus norvegicus GN=Dgkb PE=1 SV=1	0.164727	0.197336	1.12095	1.14658	108	2.66667
ACON_RAT	85380	44		1310	0.8971	1.1147	1.09216	0.915602	-0.127207	1.071	19	ACON_RAT	55	0	990	85380	0.5247	1.90585	0.758073	1.31913	0.399592	1.241	18	ACON_RAT	44	0	1417	85380	0.4756	2.10261	0.875794	1.14182	0.191335	1.039	18	Aconitate hydratase, mitochondrial OS=Rattus norvegicus GN=Aco2 PE=1 SV=2	0.154573	0.265317	1.11309	1.2019	109	18.3333
APC_RAT	310342	43		1326	0.7364	1.35796	0.896518	1.11541	0.157572	1.129	9	APC_RAT	62	0	898	310342	0.5673	1.76274	0.81962	1.22008	0.286973	1.089	9	APC_RAT	47	0	1355	310342	0.558	1.79211	1.02753	0.973207	-0.0391816	1.095	7	Adenomatous polyposis coli protein OS=Rattus norvegicus GN=Apc PE=1 SV=1	0.135121	0.164232	1.09818	1.12057	110	8.33333
MTAP2_RAT	202288	6		5341	0.7191	1.39063	0.875457	1.14224	0.191869	1.049	39	MTAP2_RAT	5	0	5491	202288	0.5774	1.7319	0.834212	1.19874	0.261514	1.044	38	MTAP2_RAT	6	1	5324	202288	0.5627	1.77715	1.03618	0.965078	-0.0512824	1.05	39	Microtubule-associated protein 2 OS=Rattus norvegicus GN=Map2 PE=1 SV=3	0.134033	0.164223	1.09736	1.12056	111	38.6667
ODP2_RAT	67123	319		206	0.8018	1.24719	0.976138	1.02443	0.0348192	1.223	2	ODP2_RAT	274	0	237	67123	0.5509	1.81521	0.795926	1.2564	0.329294	1.183	2	ODP2_RAT	257	0	300	67123	0.546	1.8315	1.00543	0.994596	-0.00781739	1.242	2	Dihydrolipoyllysine-residue acetyltransferase component of pyruvate dehydrogenase complex, mitochondrial OS=Rattus norvegicus GN=Dlat PE=1 SV=3	0.118765	0.183565	1.08581	1.13569	112	2
AT1A1_RAT	112982	10	3	3265	0.7195	1.38985	0.875944	1.14161	0.191067	1.078	20	AT1A1_RAT	11	3	2890	112982	0.6977	1.43328	1.00802	0.992045	-0.0115221	1.086	22	AT1A1_RAT	10	3	3145	112982	0.4829	2.07082	0.889237	1.12456	0.169359	1.095	22	Sodium/potassium-transporting ATPase subunit alpha-1 OS=Rattus norvegicus GN=Atp1a1 PE=1 SV=1	0.116301	0.111229	1.08395	1.08015	113	21.3333
AT1A3_RAT	111620	10	1	3839	0.7153	1.39801	0.87083	1.14831	0.199513	1.064	31	AT1A3_RAT	11	1	3412	111620	0.6822	1.46585	0.985625	1.01459	0.02089	1.061	27	AT1A3_RAT	10	1	3871	111620	0.4979	2.00844	0.916858	1.09068	0.125228	1.077	26	Sodium/potassium-transporting ATPase subunit alpha-3 OS=Rattus norvegicus GN=Atp1a3 PE=1 SV=2	0.11521	0.089732	1.08313	1.06417	114	28
AT1A2_RAT	112145	10	2	3397	0.7188	1.39121	0.875091	1.14272	0.192471	1.07	28	AT1A2_RAT	11	2	3055	112145	0.6971	1.43451	1.00715	0.992899	-0.0102809	1.07	24	AT1A2_RAT	10	2	3402	112145	0.5013	1.99481	0.923119	1.08328	0.115409	1.096	24	Sodium/potassium-transporting ATPase subunit alpha-2 OS=Rattus norvegicus GN=Atp1a2 PE=1 SV=1	0.0991999	0.102343	1.07118	1.07352	115	25.3333
RL24_RAT	17768	205		346	0.7606	1.31475	0.92598	1.07992	0.110924	1.089	3	RL24_RAT	130	0	525	17768	0.6663	1.50083	0.962653	1.0388	0.0549128	1.112	4	RL24_RAT	167	0	480	17768	0.5004	1.9984	0.921462	1.08523	0.118002	1.039	2	60S ribosomal protein L24 OS=Rattus norvegicus GN=Rpl24 PE=2 SV=1	0.0946128	0.0345628	1.06778	1.02425	116	3
MAP6_RAT	100423	7		4975	0.7266	1.37627	0.884587	1.13045	0.1769	1.044	39	MAP6_RAT	8	0	4252	100423	0.6364	1.57134	0.919454	1.0876	0.121151	1.048	43	MAP6_RAT	9	0	4308	100423	0.5579	1.79244	1.02735	0.973381	-0.038923	1.048	44	Microtubule-associated protein 6 OS=Rattus norvegicus GN=Map6 PE=1 SV=1	0.0863761	0.112035	1.0617	1.08075	117	42
MARK2_RAT	80821	20	1	1915	0.7941	1.25929	0.966764	1.03436	0.048741	1.091	17	MARK2_RAT	24	1	1668	80821	0.5992	1.66889	0.865708	1.15512	0.208047	1.135	18	MARK2_RAT	32	1	1783	80821	0.5425	1.84332	0.998987	1.00101	0.00146042	1.372	23	Serine/threonine-protein kinase MARK2 OS=Rattus norvegicus GN=Mark2 PE=1 SV=1	0.0860828	0.108237	1.06148	1.07791	118	19.3333
HNRPM_RAT	73733	51		1203	0.796	1.25628	0.969077	1.03189	0.0452932	1.096	12	HNRPM_RAT	45	0	1209	73733	0.5671	1.76336	0.819331	1.22051	0.287482	1.069	8	HNRPM_RAT	43	0	1440	73733	0.5736	1.74338	1.05626	0.946739	-0.0789615	1.047	13	Heterogeneous nuclear ribonucleoprotein M OS=Rattus norvegicus GN=Hnrnpm PE=1 SV=4	0.0846044	0.186358	1.0604	1.13789	119	11
RS7_RAT	22113	383		156	0.9085	1.10072	1.10604	0.904113	-0.145425	1.236	5	RS7_RAT	265	0	254	22113	0.6922	1.44467	1.00007	0.999928	-0.000104222	1.19	6	RS7_RAT	187	0	441	22113	0.416	2.40385	0.766044	1.30541	0.3845	1.089	9	40S ribosomal protein S7 OS=Rattus norvegicus GN=Rps7 PE=1 SV=1	0.079657	0.273818	1.05677	1.209	120	6.66667
AT2B1_RAT	138632	50	1	1248	0.765	1.30719	0.931337	1.07371	0.102602	1.083	15	AT2B1_RAT	53	1	1004	138632	0.7189	1.39101	1.03865	0.96279	-0.0547064	1.08	14	AT2B1_RAT	49	1	1305	138632	0.4944	2.02265	0.910413	1.0984	0.135405	1.091	14	Plasma membrane calcium-transporting ATPase 1 OS=Rattus norvegicus GN=Atp2b1 PE=1 SV=2	0.0611001	0.101624	1.04326	1.07298	121	14.3333
TRIO_RAT	347642	195		382	0.7734	1.29299	0.941563	1.06205	0.0868469	1.149	5	TRIO_RAT	230	0	293	347642	0.5975	1.67364	0.863252	1.15841	0.212146	1.156	3	TRIO_RAT	248	0	316	347642	0.5915	1.69062	1.08922	0.918089	-0.123295	1.274	3	Triple functional domain protein OS=Rattus norvegicus GN=Trio PE=1 SV=4	0.0585661	0.169499	1.04143	1.12467	122	3.66667
PPR1B_RAT	22899	379		159	0.5657	1.76772	0.688702	1.45198	0.538024	1.387	2	PPR1B_RAT	575	0	64	22899	0.5875	1.70213	0.848804	1.17813	0.236496	1.052	2	PPR1B_RAT	400	0	165	22899	0.828	1.20773	1.52472	0.655857	-0.608547	1.064	3	Protein phosphatase 1 regulatory subunit 1B OS=Rattus norvegicus GN=Ppp1r1b PE=1 SV=1	0.0553244	0.594369	1.03909	1.50981	123	2.33333
GRP75_RAT	73812	71		947	0.7272	1.37514	0.885318	1.12952	0.175709	1.052	17	GRP75_RAT	58	0	968	73812	0.6274	1.59388	0.906451	1.1032	0.141699	1.062	16	GRP75_RAT	75	0	934	73812	0.6041	1.65536	1.11242	0.89894	-0.153704	1.031	20	Stress-70 protein, mitochondrial OS=Rattus norvegicus GN=Hspa9 PE=1 SV=3	0.0545683	0.181169	1.03855	1.1338	124	17.6667
AT2B3_RAT	138471	50	3	752	0.6862	1.4573	0.835403	1.19701	0.259433	1.1	8	AT2B3_RAT	53	3	594	138471	0.9064	1.10327	1.30954	0.763625	-0.389063	1.205	8	AT2B3_RAT	49	3	998	138471	0.4432	2.25632	0.816131	1.22529	0.293126	1.067	11	Plasma membrane calcium-transporting ATPase 3 OS=Rattus norvegicus GN=Atp2b3 PE=1 SV=2	0.0544984	0.384505	1.0385	1.30541	125	9
WDR7_RAT	163086	56		1082	0.7349	1.36073	0.894692	1.11769	0.160514	1.045	14	WDR7_RAT	68	0	857	163086	0.6295	1.58856	0.909485	1.09952	0.136878	1.074	15	WDR7_RAT	64	0	1089	163086	0.5994	1.66834	1.10377	0.905988	-0.142436	1.041	16	WD repeat-containing protein 7 OS=Rattus norvegicus GN=Wdr7 PE=1 SV=1	0.0516522	0.1685	1.03645	1.12389	126	15
ALDOA_RAT	39327	231		308	0.6788	1.47319	0.826394	1.21006	0.275075	1.142	3	ALDOA_RAT	166	1	405	39327	0.8557	1.16863	1.23629	0.80887	-0.30602	1.196	3	ALDOA_RAT	233	1	349	39327	0.4786	2.08943	0.881318	1.13466	0.182263	1.012	3	Fructose-bisphosphate aldolase A OS=Rattus norvegicus GN=Aldoa PE=1 SV=2	0.0504393	0.312172	1.03558	1.24158	127	3
KIF5A_RAT	116843	366	3	67	0.9056	1.10424	1.10251	0.907008	-0.140812	1.24	2	KIF5A_RAT	403	1	130	116843	0.7399	1.35153	1.06899	0.935464	-0.0962456	1.059	3	KIF5A_RAT	290	1	265	116843	0.4177	2.39406	0.769174	1.30009	0.378616	1.301	2	Kinesin heavy chain isoform 5A OS=Rattus norvegicus GN=Kif5a PE=1 SV=1	0.0471862	0.287891	1.03325	1.22085	128	2.33333
CSKI1_RAT	150255	111		639	0.7162	1.39626	0.871926	1.14687	0.197699	1.075	4	CSKI1_RAT	144	0	473	150255	0.7066	1.41523	1.02088	0.97955	-0.029809	1.126	6	CSKI1_RAT	127	0	611	150255	0.5613	1.78158	1.03361	0.967485	-0.0476885	1.03	11	Caskin-1 OS=Rattus norvegicus GN=Caskin1 PE=1 SV=1	0.0400672	0.136806	1.02816	1.09947	129	7
LANC1_RAT	45210	27		1744	0.6893	1.45075	0.839177	1.19162	0.25293	1.161	13	LANC1_RAT	19	0	1926	45210	0.6898	1.4497	0.996605	1.00341	0.00490659	1.08	17	LANC1_RAT	15	0	2625	45210	0.6085	1.64339	1.12052	0.89244	-0.164174	1.263	18	LanC-like protein 1 OS=Rattus norvegicus GN=Lancl1 PE=1 SV=2	0.0312208	0.209793	1.02188	1.15652	130	16
1433F_RAT	28194	95	6	227	0.8427	1.18666	1.02593	0.974708	-0.0369575	1.115	5	1433F_RAT	86	6	343	28194	0.5243	1.9073	0.757495	1.32014	0.400692	1.176	6	1433F_RAT	120	5	296	28194	0.6583	1.51906	1.21223	0.824927	-0.277662	1.558	6	14-3-3 protein eta OS=Rattus norvegicus GN=Ywhah PE=1 SV=2	0.028691	0.343909	1.02009	1.26919	131	5.66667
LETM1_RAT	83008	274		254	0.7264	1.37665	0.884344	1.13076	0.177297	1.483	3	LETM1_RAT	340	0	180	83008	0.6131	1.63106	0.885791	1.12893	0.174962	1.185	2	LETM1_RAT	297	0	257	83008	0.663	1.5083	1.22088	0.819079	-0.287925	1.058	3	LETM1 and EF-hand domain-containing protein 1, mitochondrial OS=Rattus norvegicus GN=Letm1 PE=1 SV=1	0.0214448	0.267925	1.01498	1.20407	132	2.66667
RS5_RAT	22864	577		70	0.8247	1.21256	1.00402	0.995982	-0.00580775	1.099	5	RS5_RAT	267	0	250	22864	0.7519	1.32996	1.08633	0.920535	-0.119456	1.035	4	RS5_RAT	495	0	114	22864	0.4786	2.08943	0.881318	1.13466	0.182263	1.103	3	40S ribosomal protein S5 OS=Rattus norvegicus GN=Rps5 PE=1 SV=3	0.0189998	0.152382	1.01326	1.1114	133	4
VDAC2_RAT	31726	182	1	406	0.8181	1.22234	0.995982	1.00402	0.00578446	1.19	7	VDAC2_RAT	213	1	311	31726	0.5916	1.69033	0.854728	1.16996	0.226463	1.178	7	VDAC2_RAT	126	1	613	31726	0.6214	1.60927	1.14428	0.873913	-0.194439	1.236	6	Voltage-dependent anion-selective channel protein 2 OS=Rattus norvegicus GN=Vdac2 PE=1 SV=2	0.0126028	0.210533	1.00877	1.15712	134	6.66667
DNM1L_RAT	83856	165		434	0.7554	1.3238	0.919649	1.08735	0.120821	1.173	4	DNM1L_RAT	145	0	473	83856	0.7705	1.29786	1.1132	0.898313	-0.15471	1.337	3	DNM1L_RAT	245	0	323	83856	0.5174	1.93274	0.952767	1.04957	0.0698035	1.168	2	Dynamin-1-like protein OS=Rattus norvegicus GN=Dnm1l PE=1 SV=1	0.0119714	0.146587	1.00833	1.10695	135	3
SYGP1_RAT	144631	146	1	507	0.818	1.22249	0.995861	1.00414	0.00596082	1.2	5	SYGP1_RAT	221	1	302	144631	0.6066	1.64853	0.8764	1.14103	0.190339	1.29	3	SYGP1_RAT	155	1	513	144631	0.6092	1.6415	1.12181	0.891414	-0.165832	1.172	5	Ras/Rap GTPase-activating protein SynGAP OS=Rattus norvegicus GN=Syngap1 PE=1 SV=2	0.0101559	0.178123	1.00706	1.13141	136	4.33333
VDAC1_RAT	30737	339		190	0.7682	1.30174	0.935233	1.06924	0.0965797	1.114	4	VDAC1_RAT	204	0	319	30737	0.7449	1.34246	1.07621	0.929185	-0.105962	1.069	4	VDAC1_RAT	255	0	302	30737	0.5344	1.87126	0.984071	1.01619	0.0231635	1.13	3	Voltage-dependent anion-selective channel protein 1 OS=Rattus norvegicus GN=Vdac1 PE=1 SV=4	0.00459373	0.10254	1.00319	1.07366	137	3.66667
LRRC7_RAT	166774	100		707	0.7082	1.41203	0.862187	1.15982	0.213905	1.119	6	LRRC7_RAT	118	0	555	166774	0.7356	1.35943	1.06278	0.940933	-0.0878368	1.104	5	LRRC7_RAT	95	0	766	166774	0.5979	1.67252	1.101	0.908261	-0.138821	1.101	8	Leucine-rich repeat-containing protein 7 OS=Rattus norvegicus GN=Lrrc7 PE=1 SV=2	-0.00425087	0.19064	0.997058	1.14127	138	6.33333
HNRPQ_RAT	59674	217		326	0.8276	1.20831	1.00755	0.992492	-0.010872	1.11	4	HNRPQ_RAT	193	0	340	59674	0.6239	1.60282	0.901394	1.10939	0.14977	1.15	5	HNRPQ_RAT	247	0	321	59674	0.6067	1.64826	1.11721	0.895087	-0.1599	1.168	4	Heterogeneous nuclear ribonucleoprotein Q OS=Rattus norvegicus GN=Syncrip PE=2 SV=1	-0.00700061	0.154871	0.995159	1.11332	139	4.33333
OPA1_RAT	111238	98		710	0.7925	1.26183	0.964816	1.03645	0.0516507	1.059	17	OPA1_RAT	65	0	888	111238	0.6426	1.55618	0.928411	1.07711	0.107164	1.056	17	OPA1_RAT	59	0	1127	111238	0.6221	1.60746	1.14557	0.87293	-0.196063	1.032	23	Dynamin-like 120 kDa protein, mitochondrial OS=Rattus norvegicus GN=Opa1 PE=1 SV=1	-0.0124162	0.161447	0.991431	1.11841	140	19
ODO1_RAT	116221	151		491	0.767	1.30378	0.933772	1.07091	0.0988351	1.1	7	ODO1_RAT	232	0	292	116221	0.7258	1.37779	1.04862	0.953637	-0.0684873	1.031	8	ODO1_RAT	280	0	281	116221	0.5731	1.7449	1.05534	0.947565	-0.0777033	1.079	5	2-oxoglutarate dehydrogenase, mitochondrial OS=Rattus norvegicus GN=Ogdh PE=1 SV=1	-0.0157852	0.099371	0.989118	1.07131	141	6.66667
DYN1_RAT	97234	91	1	746	0.6797	1.47124	0.82749	1.20845	0.273164	1.397	9	DYN1_RAT	116	1	571	97234	0.7839	1.27567	1.13256	0.882957	-0.179585	1.077	9	DYN1_RAT	94	1	770	97234	0.6012	1.66334	1.10708	0.903276	-0.146761	1.045	16	Dynamin-1 OS=Rattus norvegicus GN=Dnm1 PE=1 SV=2	-0.0177276	0.252453	0.987787	1.19123	142	11.3333
MARE3_RAT	31946	325	1	200	0.7677	1.30259	0.934624	1.06993	0.097519	1.033	5	MARE3_RAT	282	1	233	31946	0.5787	1.72801	0.83609	1.19604	0.258269	1.189	4	MARE3_RAT	327	1	222	31946	0.7214	1.38619	1.32842	0.752772	-0.409716	1.106	2	Microtubule-associated protein RP/EB family member 3 OS=Rattus norvegicus GN=Mapre3 PE=1 SV=1	-0.0179759	0.348648	0.987617	1.27337	143	3.66667
S61A1_RAT	52231	340		188	0.8294	1.20569	1.00974	0.990338	-0.0140064	1.158	4	S61A1_RAT	253	0	263	52231	0.6092	1.6415	0.880156	1.13616	0.184169	1.362	4	S61A1_RAT	505	0	112	52231	0.6374	1.56887	1.17374	0.851976	-0.231115	1.32	3	Protein transport protein Sec61 subunit alpha isoform 1 OS=Rattus norvegicus GN=Sec61a1 PE=2 SV=2	-0.0203177	0.207714	0.986016	1.15486	144	3.66667
1433E_RAT	29155	95	3	409	0.9159	1.09182	1.11505	0.896808	-0.157128	1.117	5	1433E_RAT	86	3	440	29155	0.6837	1.46263	0.987792	1.01236	0.0177213	1.298	4	1433E_RAT	120	4	460	29155	0.5152	1.94099	0.948716	1.05406	0.075951	1.486	5	14-3-3 protein epsilon OS=Rattus norvegicus GN=Ywhae PE=1 SV=1	-0.0211521	0.121305	0.985445	1.08772	145	4.66667
CBR1_RAT	30559	139		535	1.057	0.946074	1.28683	0.777092	-0.363842	1.066	10	CBR1_RAT	104	0	635	30559	0.7905	1.26502	1.14209	0.875585	-0.191681	1.051	8	CBR1_RAT	130	0	599	30559	0.3909	2.5582	0.719823	1.38923	0.474284	1.183	10	Carbonyl reductase [NADPH] 1 OS=Rattus norvegicus GN=Cbr1 PE=1 SV=2	-0.0270795	0.442644	0.981405	1.35909	146	9.33333
SYNPO_RAT	99924	157		465	0.8064	1.24008	0.981738	1.01858	0.026566	1.111	11	SYNPO_RAT	172	0	380	99924	0.6691	1.49454	0.966698	1.03445	0.0488629	1.13	7	SYNPO_RAT	190	0	439	99924	0.618	1.61812	1.13802	0.878721	-0.186523	1.122	9	Synaptopodin OS=Rattus norvegicus GN=Synpo PE=1 SV=2	-0.0370315	0.129943	0.974658	1.09425	147	9
MARK3_RAT	88696	20	2	979	0.9814	1.01895	1.19479	0.836954	-0.25678	1.094	17	MARK3_RAT	24	2	870	88696	0.8084	1.23701	1.16795	0.856197	-0.223985	1.07	17	MARK3_RAT	32	2	990	88696	0.4276	2.33863	0.787404	1.26999	0.344822	1.393	19	MAP/microtubule affinity-regulating kinase 3 OS=Rattus norvegicus GN=Mark3 PE=1 SV=1	-0.0453142	0.338265	0.969079	1.26424	148	17.6667
DGKZ_RAT	103943	244		292	0.7485	1.33601	0.911249	1.09738	0.134059	1.178	3	DGKZ_RAT	321	0	193	103943	0.7855	1.27307	1.13487	0.881158	-0.182527	1.045	3	DGKZ_RAT	319	0	232	103943	0.6007	1.66472	1.10616	0.904028	-0.145561	1.139	4	Diacylglycerol kinase zeta OS=Rattus norvegicus GN=Dgkz PE=1 SV=1	-0.0646761	0.1731	0.95616	1.12748	149	3.33333
EPS8_RAT	91871	79		847	0.7683	1.30157	0.935354	1.0691	0.0963919	1.058	3	EPS8_RAT	113	0	579	91871	0.7066	1.41523	1.02088	0.97955	-0.029809	1.188	4	EPS8_RAT	115	0	656	91871	0.6598	1.51561	1.21499	0.823052	-0.280945	1.123	5	Epidermal growth factor receptor kinase substrate 8 OS=Rattus norvegicus GN=Eps8 PE=1 SV=2	-0.0714541	0.192085	0.951678	1.14241	150	4
AP2A2_RAT	103979	77		883	0.6082	1.6442	0.740443	1.35052	0.433516	1.32	12	AP2A2_RAT	99	0	657	103979	0.7201	1.3887	1.04038	0.961186	-0.0571125	1.124	9	AP2A2_RAT	102	0	725	103979	0.8357	1.1966	1.5389	0.649814	-0.621902	1.242	6	AP-2 complex subunit alpha-2 OS=Rattus norvegicus GN=Ap2a2 PE=1 SV=3	-0.0818328	0.528143	0.944857	1.44207	151	9
ACLY_RAT	120559	253		282	1.051	0.951475	1.27952	0.781529	-0.355629	1.294	2	ACLY_RAT	251	0	265	120559	0.7939	1.2596	1.14701	0.871835	-0.197873	1.126	4	ACLY_RAT	238	0	339	120559	0.4428	2.25836	0.815395	1.2264	0.294428	1.179	4	ATP-citrate synthase OS=Rattus norvegicus GN=Acly PE=1 SV=1	-0.0863578	0.339073	0.941898	1.26494	152	3.33333
GRB2_RAT	25190	423		130	0.9281	1.07747	1.1299	0.88502	-0.176219	1.141	5	GRB2_RAT	244	0	272	25190	0.9123	1.09613	1.31807	0.758687	-0.398424	1.05	5	GRB2_RAT	425	0	155	25190	0.4372	2.28728	0.805082	1.24211	0.31279	1.334	3	Growth factor receptor-bound protein 2 OS=Rattus norvegicus GN=Grb2 PE=1 SV=1	-0.087284	0.363852	0.941293	1.28686	153	4.33333
CAPZB_RAT	30609	235		305	0.8419	1.18779	1.02496	0.975635	-0.0355872	1.123	6	CAPZB_RAT	277	0	235	30609	0.6191	1.61525	0.894459	1.11799	0.160912	1.107	4	CAPZB_RAT	244	0	328	30609	0.7125	1.40351	1.31203	0.762175	-0.391806	1.085	6	F-actin-capping protein subunit beta OS=Rattus norvegicus GN=Capzb PE=1 SV=1	-0.0888271	0.280179	0.940287	1.21435	154	5.33333
CALD1_RAT	60548	39		1445	0.9123	1.09613	1.11066	0.900347	-0.151447	1.091	17	CALD1_RAT	60	0	926	60548	0.6496	1.53941	0.938525	1.0655	0.0915331	1.042	13	CALD1_RAT	76	0	919	60548	0.6275	1.59363	1.15551	0.865417	-0.208532	1.123	8	Non-muscle caldesmon OS=Rattus norvegicus GN=Cald1 PE=1 SV=1	-0.0894818	0.159341	0.93986	1.11678	155	12.6667
AMPH_RAT	74832	259	1	276	0.8407	1.18948	1.0235	0.977027	-0.0335294	1.041	5	AMPH_RAT	284	0	232	74832	0.6921	1.44488	0.999928	1.00007	0.000104215	1.047	7	AMPH_RAT	225	2	251	74832	0.6511	1.53586	1.19897	0.834049	-0.261796	1.1	5	Amphiphysin OS=Rattus norvegicus GN=Amph PE=1 SV=1	-0.0984069	0.142495	0.934064	1.10381	156	5.66667
GLRX3_RAT	37825	178		416	0.9558	1.04624	1.16362	0.859371	-0.218647	1.061	8	GLRX3_RAT	125	0	537	37825	0.749	1.33511	1.08214	0.924099	-0.113881	1.074	10	GLRX3_RAT	183	0	445	37825	0.5389	1.85563	0.992358	1.0077	0.011066	1.098	7	Glutaredoxin-3 OS=Rattus norvegicus GN=Glrx3 PE=1 SV=2	-0.107154	0.115004	0.928418	1.08298	157	8.33333
PP1B_RAT	37163	210	1	336	0.8827	1.13289	1.07463	0.930539	-0.103862	1.053	3	PP1B_RAT	247	1	271	37163	0.6966	1.43554	1.00643	0.993612	-0.00924575	1.181	4	PP1B_RAT	170	1	469	37163	0.6296	1.58831	1.15938	0.862531	-0.213352	1.123	4	Serine/threonine-protein phosphatase PP1-beta catalytic subunit OS=Rattus norvegicus GN=Ppp1cb PE=1 SV=3	-0.10882	0.102143	0.927346	1.07337	158	3.66667
CAZA2_RAT	32947	198	1	366	0.8657	1.15513	1.05393	0.948812	-0.0758055	1.07	8	CAZA2_RAT	280	1	233	32947	0.652	1.53374	0.941992	1.06158	0.0862128	1.13	6	CAZA2_RAT	214	1	385	32947	0.6884	1.45264	1.26765	0.788857	-0.342164	1.044	9	F-actin-capping protein subunit alpha-2 OS=Rattus norvegicus GN=Capza2 PE=1 SV=1	-0.110585	0.216296	0.926212	1.16175	159	7.66667
HXK1_RAT	102342	175	1	418	1.38	0.724638	1.68006	0.595208	-0.748535	1.035	2	HXK1_RAT	228	0	297	102342	0.8036	1.2444	1.16102	0.861312	-0.215393	1.325	3	HXK1_RAT	158	0	508	102342	0.3529	2.83366	0.649848	1.53882	0.621824	1.296	3	Hexokinase-1 OS=Rattus norvegicus GN=Hk1 PE=1 SV=4	-0.114034	0.690779	0.924	1.61416	160	2.66667
RL8_RAT	28007	133		553	1.192	0.838926	1.45118	0.689083	-0.537251	1.322	11	RL8_RAT	153	0	454	28007	0.8123	1.23107	1.17359	0.852087	-0.230928	1.171	7	RL8_RAT	83	0	844	28007	0.4078	2.45218	0.750944	1.33166	0.413222	1.084	12	60S ribosomal protein L8 OS=Rattus norvegicus GN=Rpl8 PE=2 SV=2	-0.118319	0.485139	0.92126	1.39972	161	10
PYGM_RAT	97212	164	1	437	0.8458	1.18231	1.02971	0.971136	-0.0422549	1.046	8	PYGM_RAT	119	1	552	97212	0.6979	1.43287	1.00831	0.991761	-0.0119356	1.084	6	PYGM_RAT	122	1	616	97212	0.6698	1.49298	1.2334	0.810764	-0.302647	1.056	7	Glycogen phosphorylase, muscle form OS=Rattus norvegicus GN=Pygm PE=1 SV=5	-0.118946	0.15981	0.92086	1.11714	162	7
RS27A_RAT	17939	299		229	1.072	0.932836	1.30509	0.766219	-0.384171	1.2	2	RS27A_RAT	236	0	288	17939	0.8189	1.22115	1.18313	0.845219	-0.242603	1.281	2	RS27A_RAT	188	0	440	17939	0.4586	2.18055	0.844489	1.18415	0.243847	1.049	2	Ubiquitin-40S ribosomal protein S27a OS=Rattus norvegicus GN=Rps27a PE=1 SV=2	-0.127642	0.329414	0.915326	1.2565	163	2
RS8_RAT	24190	87		767	1.029	0.971817	1.25274	0.798238	-0.325109	1.235	10	RS8_RAT	63	0	896	24190	0.7014	1.42572	1.01336	0.986812	-0.0191527	1.417	8	RS8_RAT	70	0	993	24190	0.5601	1.7854	1.0314	0.969558	-0.0446009	1.117	13	40S ribosomal protein S8 OS=Rattus norvegicus GN=Rps8 PE=1 SV=2	-0.129621	0.169775	0.914072	1.12488	164	10.3333
ROA3_RAT	39628	304		219	1.012	0.988142	1.23204	0.811647	-0.301076	1.068	5	ROA3_RAT	226	0	301	39628	0.7428	1.34626	1.07318	0.931812	-0.101889	1.067	6	ROA3_RAT	162	1	486	39628	0.539	1.85529	0.992542	1.00751	0.0107983	1.321	10	Heterogeneous nuclear ribonucleoprotein A3 OS=Rattus norvegicus GN=Hnrnpa3 PE=1 SV=1	-0.130722	0.157924	0.913374	1.11568	165	7
ELAV4_RAT	40938	108	2	545	0.8431	1.1861	1.02642	0.974246	-0.0376421	1.049	11	ELAV4_RAT	88	2	704	40938	0.7634	1.30993	1.10294	0.906668	-0.141354	1.066	12	ELAV4_RAT	110	2	676	40938	0.6356	1.57332	1.17043	0.854389	-0.227036	1.098	11	ELAV-like protein 4 OS=Rattus norvegicus GN=Elavl4 PE=1 SV=1	-0.135344	0.0948397	0.910453	1.06795	166	11.3333
TFAM_RAT	28169	345		183	1.406	0.711238	1.71171	0.584201	-0.775463	1.051	2	TFAM_RAT	415	0	124	28169	0.863	1.15875	1.24684	0.802028	-0.318276	1.042	2	TFAM_RAT	447	0	145	28169	0.3431	2.9146	0.631802	1.58277	0.662454	1.198	2	Transcription factor A, mitochondrial OS=Rattus norvegicus GN=Tfam PE=2 SV=1	-0.143761	0.734672	0.905156	1.66402	167	2
MARK1_RAT	88180	20	3	936	1.02	0.980392	1.24178	0.805281	-0.312436	1.051	16	MARK1_RAT	24	3	738	88180	0.8443	1.18441	1.21982	0.819792	-0.286671	1.052	12	MARK1_RAT	32	3	948	88180	0.4846	2.06356	0.892367	1.12061	0.164289	1.38	18	Serine/threonine-protein kinase MARK1 OS=Rattus norvegicus GN=Mark1 PE=1 SV=1	-0.144939	0.268109	0.904418	1.20423	168	15.3333
PP1G_RAT	36960	210	3	189	0.8637	1.15781	1.0515	0.951009	-0.0724686	1.056	2	PP1G_RAT	247	3	132	36960	0.7056	1.41723	1.01943	0.980938	-0.0277658	1.207	2	PP1G_RAT	170	3	385	36960	0.6911	1.44697	1.27263	0.785775	-0.347811	1.146	4	Serine/threonine-protein phosphatase PP1-gamma catalytic subunit OS=Rattus norvegicus GN=Ppp1cc PE=1 SV=1	-0.149348	0.173321	0.901658	1.12765	169	2.66667
ELAV2_RAT	39481	108	1	656	0.8031	1.24517	0.977721	1.02277	0.032482	1.069	12	ELAV2_RAT	88	1	715	39481	0.785	1.27389	1.13415	0.88172	-0.181608	1.055	12	ELAV2_RAT	110	1	681	39481	0.6688	1.49522	1.23156	0.811976	-0.300491	1.099	11	ELAV-like protein 2 OS=Rattus norvegicus GN=Elavl2 PE=1 SV=1	-0.149872	0.16874	0.90133	1.12408	170	11.6667
SYNJ1_RAT	172773	67	1	1004	0.8991	1.11222	1.09459	0.913566	-0.13042	1.043	16	SYNJ1_RAT	92	0	685	172773	0.7405	1.35044	1.06985	0.934706	-0.097415	1.015	11	SYNJ1_RAT	73	0	947	172773	0.6374	1.56887	1.17374	0.851976	-0.231115	1.033	14	Synaptojanin-1 OS=Rattus norvegicus GN=Synj1 PE=1 SV=3	-0.152983	0.0696476	0.899389	1.04946	171	13.6667
PP1A_RAT	37488	210	2	249	0.8589	1.16428	1.04565	0.956324	-0.0644285	1.059	3	PP1A_RAT	247	2	165	37488	0.7056	1.41723	1.01943	0.980938	-0.0277658	1.207	2	PP1A_RAT	170	2	425	37488	0.7037	1.42106	1.29583	0.771706	-0.373877	1.187	3	Serine/threonine-protein phosphatase PP1-alpha catalytic subunit OS=Rattus norvegicus GN=Ppp1ca PE=1 SV=1	-0.155357	0.19013	0.89791	1.14087	172	2.66667
BIN1_RAT	64493	259	2	225	0.9475	1.05541	1.15352	0.866899	-0.206064	1.154	3	BIN1_RAT	185	0	353	64493	0.7206	1.38773	1.0411	0.960519	-0.0581139	1.076	2	BIN1_RAT	225	1	358	64493	0.6252	1.59949	1.15128	0.868601	-0.203234	1.027	5	Myc box-dependent-interacting protein 1 OS=Rattus norvegicus GN=Bin1 PE=1 SV=1	-0.155804	0.084614	0.897632	1.0604	173	3.33333
RS4X_RAT	29579	73		912	1.114	0.897666	1.35622	0.737331	-0.439616	1.029	14	RS4X_RAT	90	0	698	29579	0.8553	1.16918	1.23571	0.809248	-0.305346	1.08	13	RS4X_RAT	34	0	1698	29579	0.4499	2.22272	0.828469	1.20704	0.271479	1.347	22	40S ribosomal protein S4, X isoform OS=Rattus norvegicus GN=Rps4x PE=2 SV=2	-0.157827	0.377803	0.896374	1.29936	174	16.3333
CAZA1_RAT	32889	198	2	228	0.8391	1.19175	1.02155	0.97889	-0.0307811	1.116	5	CAZA1_RAT	280	2	224	32889	0.6933	1.44238	1.00166	0.998341	-0.00239504	1.055	4	CAZA1_RAT	214	2	361	32889	0.7483	1.33636	1.37796	0.725711	-0.462533	1.102	6	F-actin-capping protein subunit alpha-1 OS=Rattus norvegicus GN=Capza1 PE=1 SV=1	-0.165236	0.257857	0.891782	1.1957	175	5
SND1_RAT	101888	52		1195	0.9322	1.07273	1.13489	0.881127	-0.182578	1.388	11	SND1_RAT	59	0	945	101888	0.8529	1.17247	1.23225	0.811525	-0.301292	1.073	10	SND1_RAT	90	0	797	101888	0.56	1.78571	1.03121	0.969731	-0.0443433	1.088	6	Staphylococcal nuclease domain-containing protein 1 OS=Rattus norvegicus GN=Snd1 PE=1 SV=1	-0.176071	0.128598	0.88511	1.09323	176	9
EIF3H_RAT	39880	381		158	1.014	0.986193	1.23448	0.810046	-0.303924	1.107	4	EIF3H_RAT	522	0	84	39880	0.9166	1.09099	1.32428	0.755128	-0.405208	1.072	4	EIF3H_RAT	522	0	106	39880	0.4797	2.08464	0.883344	1.13206	0.178951	1.66	3	Eukaryotic translation initiation factor 3 subunit H OS=Rattus norvegicus GN=Eif3h PE=1 SV=1	-0.176727	0.312161	0.884708	1.24157	177	3.66667
RL28_RAT	15839	432	1	127	0.7235	1.38217	0.880813	1.1353	0.183069	1.08	2	RL28_RAT	485	0	95	15839	0.6904	1.44844	0.997472	1.00253	0.00365225	1.155	2	RL28_RAT	543	0	100	15839	0.8958	1.11632	1.64957	0.606217	-0.722093	1.004	2	60S ribosomal protein L28 OS=Rattus norvegicus GN=Rpl28 PE=1 SV=4	-0.178457	0.479273	0.883647	1.39404	178	2
NCKP1_RAT	128781	82		829	1.034	0.967118	1.25883	0.794378	-0.332103	1.078	15	NCKP1_RAT	66	0	876	128781	0.8033	1.24486	1.16059	0.861633	-0.214854	1.094	11	NCKP1_RAT	84	0	830	128781	0.5391	1.85494	0.992726	1.00733	0.0105306	1.051	14	Nck-associated protein 1 OS=Rattus norvegicus GN=Nckap1 PE=2 SV=1	-0.178809	0.174137	0.883432	1.12829	179	13.3333
DYN2_RAT	98169	91	2	449	1.018	0.982318	1.23935	0.806863	-0.309604	1.168	5	DYN2_RAT	116	2	278	98169	0.7047	1.41904	1.01813	0.982191	-0.0259245	1.075	5	DYN2_RAT	94	3	336	98169	0.6463	1.54727	1.19013	0.840244	-0.25112	1.036	4	Dynamin-2 OS=Rattus norvegicus GN=Dnm2 PE=1 SV=1	-0.19555	0.149782	0.87324	1.1094	180	4.66667
PURB_RAT	33398	119		608	1.08	0.925926	1.31483	0.760543	-0.394898	1.258	9	PURB_RAT	67	0	866	33398	0.6608	1.51332	0.954706	1.04744	0.066871	1.337	12	PURB_RAT	92	0	786	33398	0.65	1.53846	1.19694	0.835461	-0.259356	1.188	12	Transcriptional activator protein Pur-beta OS=Rattus norvegicus GN=Purb PE=1 SV=3	-0.195794	0.237356	0.873092	1.17883	181	11
PYGB_RAT	96113	164	2	289	0.9438	1.05955	1.14901	0.870297	-0.20042	1.029	4	PYGB_RAT	119	2	375	96113	0.6901	1.44907	0.997038	1.00297	0.00427929	1.075	8	PYGB_RAT	122	2	247	96113	0.7183	1.39218	1.32271	0.75602	-0.403503	1.063	8	Glycogen phosphorylase, brain form (Fragment) OS=Rattus norvegicus GN=Pygb PE=1 SV=3	-0.199881	0.203892	0.870622	1.1518	182	6.66667
SNPH_RAT	54460	323		204	0.9394	1.06451	1.14366	0.874374	-0.193678	1.086	5	SNPH_RAT	233	0	291	54460	0.7216	1.38581	1.04255	0.959188	-0.0601146	1.11	3	SNPH_RAT	281	0	280	54460	0.6928	1.44342	1.27576	0.783847	-0.351355	1.245	3	Syntaphilin OS=Rattus norvegicus GN=Snph PE=1 SV=1	-0.201716	0.145787	0.869516	1.10633	183	3.66667
RL4_RAT	47227	116		616	1.022	0.978474	1.24422	0.803705	-0.315262	1.059	4	RL4_RAT	123	0	546	47227	0.6642	1.50557	0.959619	1.04208	0.059467	1.098	4	RL4_RAT	135	0	582	47227	0.7022	1.4241	1.29307	0.773354	-0.370798	1.081	5	60S ribosomal protein L4 OS=Rattus norvegicus GN=Rpl4 PE=1 SV=3	-0.208864	0.234035	0.865218	1.17612	184	4.33333
MFF_RAT	24955	137		540	0.9265	1.07933	1.12795	0.886548	-0.173729	1.134	3	MFF_RAT	200	0	328	24955	0.8564	1.16768	1.2373	0.808209	-0.3072	1.119	3	MFF_RAT	166	0	481	24955	0.618	1.61812	1.13802	0.878721	-0.186523	1.209	2	Mitochondrial fission factor OS=Rattus norvegicus GN=Mff PE=1 SV=1	-0.222484	0.0736444	0.857088	1.05237	185	2.66667
CLAP2_RAT	140551	13		2736	1.09	0.917431	1.327	0.753566	-0.408195	1.023	31	CLAP2_RAT	21	0	1771	140551	0.7378	1.35538	1.06595	0.938127	-0.0921451	1.148	25	CLAP2_RAT	14	0	2690	140551	0.6131	1.63106	1.12899	0.885744	-0.175039	1.192	28	CLIP-associating protein 2 OS=Rattus norvegicus GN=Clasp2 PE=1 SV=1	-0.225126	0.16387	0.85552	1.12029	186	28
SMBP2_RAT	108373	292		235	1.092	0.915751	1.32944	0.752186	-0.410839	1.064	5	SMBP2_RAT	263	0	255	108373	0.864	1.15741	1.24828	0.8011	-0.319947	1.03	4	SMBP2_RAT	204	0	401	108373	0.5457	1.83251	1.00488	0.995143	-0.00702449	1.045	4	DNA-binding protein SMUBP-2 OS=Rattus norvegicus GN=Ighmbp2 PE=1 SV=1	-0.245937	0.211836	0.843268	1.15816	187	4.33333
HS90B_RAT	83229	196	1	373	0.9254	1.08061	1.12661	0.887602	-0.172015	1.277	4	HS90B_RAT	190	1	347	83229	0.8932	1.11957	1.29047	0.77491	-0.367899	1.151	3	HS90B_RAT	103	1	700	83229	0.6255	1.59872	1.15183	0.868185	-0.203926	1.116	5	Heat shock protein HSP 90-beta OS=Rattus norvegicus GN=Hsp90ab1 PE=1 SV=4	-0.247947	0.105099	0.842094	1.07557	188	4
CAH2_RAT	29096	397		146	1.132	0.883392	1.37813	0.725607	-0.46274	1.049	2	CAH2_RAT	528	0	82	29096	0.9558	1.04624	1.38091	0.724158	-0.465624	1.175	3	CAH2_RAT	690	0	59	29096	0.4816	2.07641	0.886843	1.12759	0.173248	1.156	3	Carbonic anhydrase 2 OS=Rattus norvegicus GN=Ca2 PE=1 SV=2	-0.251705	0.368023	0.839903	1.29058	189	2.66667
NMDE2_RAT	165965	354		174	0.8335	1.19976	1.01473	0.985467	-0.0211205	1.298	2	NMDE2_RAT	360	0	162	165965	1.042	0.959693	1.50545	0.664251	-0.590199	1.192	3	NMDE2_RAT	369	0	188	165965	0.6065	1.6488	1.11684	0.895382	-0.159424	1.087	2	Glutamate receptor ionotropic, NMDA 2B OS=Rattus norvegicus GN=Grin2b PE=1 SV=1	-0.256914	0.296801	0.836876	1.22842	190	2.33333
GRP78_RAT	72302	15	2	1421	0.9258	1.08015	1.1271	0.887218	-0.172639	1.072	17	GRP78_RAT	23	2	1316	72302	0.7183	1.39218	1.03778	0.963595	-0.0535018	1.094	19	GRP78_RAT	16	2	1833	72302	0.7958	1.2566	1.46543	0.682394	-0.551322	1.045	22	78 kDa glucose-regulated protein OS=Rattus norvegicus GN=Hspa5 PE=1 SV=1	-0.259154	0.259942	0.835578	1.19743	191	19.3333
RSSA_RAT	32803	25		1807	1.044	0.957854	1.271	0.786769	-0.345988	1.069	14	RSSA_RAT	18	0	1945	32803	0.8417	1.18807	1.21607	0.822324	-0.282221	1.13	15	RSSA_RAT	17	0	2462	32803	0.6094	1.64096	1.12218	0.891122	-0.166306	1.184	15	40S ribosomal protein SA OS=Rattus norvegicus GN=Rpsa PE=1 SV=3	-0.264838	0.0910936	0.832292	1.06518	192	14.6667
MAP1B_RAT	269334	2	2	3618	1.028	0.972763	1.25152	0.799014	-0.323707	1.062	39	MAP1B_RAT	2	2	3978	269334	0.8415	1.18835	1.21578	0.822519	-0.281879	1.038	38	MAP1B_RAT	2	2	4732	269334	0.6297	1.58806	1.15956	0.862394	-0.213581	1.104	45	Microtubule-associated protein 1B OS=Rattus norvegicus GN=Map1b PE=1 SV=2	-0.273055	0.0555904	0.827565	1.03928	193	40.6667
AP180_RAT	93460	163	1	438	1.041	0.960615	1.26735	0.789036	-0.341837	1.068	4	AP180_RAT	176	1	365	93460	0.9292	1.07619	1.34248	0.744888	-0.424904	1.101	4	AP180_RAT	182	1	445	93460	0.5648	1.77054	1.04005	0.96149	-0.0566565	1.188	4	Clathrin coat assembly protein AP180 OS=Rattus norvegicus GN=Snap91 PE=1 SV=1	-0.274466	0.193147	0.826756	1.14325	194	4
RL6_RAT	33541	40		1438	1.07	0.934579	1.30265	0.767651	-0.381477	1.13	12	RL6_RAT	47	0	1159	33541	0.8467	1.18106	1.22329	0.817468	-0.290766	1.057	14	RL6_RAT	28	0	1855	33541	0.609	1.64204	1.12144	0.891707	-0.165359	1.144	20	60S ribosomal protein L6 OS=Rattus norvegicus GN=Rpl6 PE=1 SV=5	-0.279201	0.108522	0.824047	1.07812	195	15.3333
SPS2L_RAT	61736	279		247	1.05	0.952381	1.27831	0.782273	-0.354256	1.262	4	SPS2L_RAT	304	0	212	61736	0.7198	1.38927	1.03995	0.961587	-0.0565114	1.244	2	SPS2L_RAT	266	0	290	61736	0.7304	1.36911	1.345	0.743496	-0.427603	1.032	2	SPATS2-like protein OS=Rattus norvegicus GN=Spats2l PE=2 SV=1	-0.279457	0.196528	0.823901	1.14594	196	2.66667
RL13A_RAT	23461	230		309	1.324	0.755287	1.61188	0.620383	-0.68877	1.177	6	RL13A_RAT	107	0	626	23461	0.9429	1.06056	1.36228	0.734065	-0.44602	1.292	7	RL13A_RAT	124	0	615	23461	0.4458	2.24316	0.820919	1.21815	0.284687	1.269	6	60S ribosomal protein L13a OS=Rattus norvegicus GN=Rpl13a PE=1 SV=2	-0.283368	0.506701	0.821671	1.4208	197	6.33333
PRKRA_RAT	34334	181		409	0.9777	1.02281	1.19028	0.840121	-0.25133	1.227	11	PRKRA_RAT	237	0	288	34334	0.8346	1.19818	1.20581	0.829319	-0.27	1.203	9	PRKRA_RAT	131	0	599	34334	0.6858	1.45815	1.26287	0.791848	-0.336704	1.255	11	Interferon-inducible double-stranded RNA-dependent protein kinase activator A OS=Rattus norvegicus GN=Prkra PE=1 SV=1	-0.286012	0.0448827	0.820166	1.0316	198	10.3333
RL17_RAT	21383	265		268	1.15	0.869565	1.40005	0.714249	-0.4855	1.101	5	RL17_RAT	248	0	270	21383	0.9773	1.02323	1.41198	0.708227	-0.497717	1.051	6	RL17_RAT	236	0	341	21383	0.5045	1.98216	0.929012	1.07641	0.106229	1.127	6	60S ribosomal protein L17 OS=Rattus norvegicus GN=Rpl17 PE=2 SV=3	-0.292329	0.345216	0.816583	1.27034	199	5.66667
CNKR2_RAT	117317	110		650	0.9551	1.04701	1.16277	0.860001	-0.21759	1.072	9	CNKR2_RAT	148	0	458	117317	0.8672	1.15314	1.25291	0.798143	-0.32528	1.212	6	CNKR2_RAT	112	1	665	117317	0.6941	1.44071	1.27815	0.782379	-0.35406	1.255	5	Connector enhancer of kinase suppressor of ras 2 OS=Rattus norvegicus GN=Cnksr2 PE=1 SV=1	-0.298977	0.0719368	0.812829	1.05113	200	6.66667
ELAV1_RAT	36146	280		247	0.9656	1.03563	1.17555	0.850649	-0.233364	1.066	5	ELAV1_RAT	309	0	210	36146	0.7817	1.27926	1.12938	0.885442	-0.17553	1.13	4	ELAV1_RAT	160	0	505	36146	0.7657	1.30599	1.41	0.70922	-0.495696	1.134	5	ELAV-like protein 1 OS=Rattus norvegicus GN=Elavl1 PE=1 SV=1	-0.30153	0.170621	0.811391	1.12554	201	4.66667
H14_RAT	21974	216		327	1.071	0.933707	1.30387	0.766934	-0.382825	1.152	4	H14_RAT	150	1	457	21974	0.7914	1.26358	1.14339	0.874589	-0.193322	1.102	4	H14_RAT	121	1	618	21974	0.6832	1.4637	1.25808	0.794862	-0.331224	1.188	6	Histone H1.4 OS=Rattus norvegicus GN=Hist1h1e PE=1 SV=3	-0.302457	0.0979718	0.81087	1.07027	202	4.66667
RS9_RAT	22578	162		441	1.23	0.813008	1.49744	0.667794	-0.582525	1.096	12	RS9_RAT	96	0	663	22578	0.9313	1.07377	1.34552	0.743208	-0.428161	1.072	14	RS9_RAT	144	0	565	22578	0.5074	1.97083	0.934352	1.07026	0.09796	1.125	15	40S ribosomal protein S9 OS=Rattus norvegicus GN=Rps9 PE=1 SV=4	-0.304242	0.356766	0.809868	1.28055	203	13.6667
RL10A_RAT	24816	191		392	1.352	0.739645	1.64597	0.607535	-0.718962	1.152	8	RL10A_RAT	50	0	1008	24816	0.8069	1.23931	1.16579	0.857789	-0.221305	1.17	10	RL10A_RAT	80	1	890	24816	0.5372	1.8615	0.989228	1.01089	0.0156243	1.147	9	60S ribosomal protein L10a OS=Rattus norvegicus GN=Rpl10a PE=1 SV=2	-0.308214	0.374925	0.807641	1.29677	204	9
CTND2_RAT	28910	306		214	1.113	0.898473	1.355	0.737993	-0.43832	1.062	3	CTND2_RAT	411	0	126	28910	0.7108	1.40687	1.02695	0.973762	-0.038359	1.307	2	CTND2_RAT	301	0	252	28910	0.7455	1.34138	1.3728	0.728437	-0.457125	1.284	3	Catenin delta-2 (Fragment) OS=Rattus norvegicus GN=Ctnnd2 PE=1 SV=1	-0.311268	0.236533	0.805933	1.17816	205	2.66667
DREB_RAT	77424	170		425	0.9559	1.04613	1.16374	0.859281	-0.218798	1.365	4	DREB_RAT	225	0	301	77424	0.9295	1.07585	1.34292	0.744648	-0.42537	1.046	4	DREB_RAT	346	0	200	77424	0.6678	1.49745	1.22972	0.813192	-0.298333	1.412	3	Drebrin OS=Rattus norvegicus GN=Dbn1 PE=1 SV=3	-0.314167	0.104192	0.804315	1.07489	206	3.66667
DDB1_RAT	126781	301		226	1.064	0.93985	1.29535	0.77198	-0.373365	1.081	4	DDB1_RAT	348	0	167	126781	0.8852	1.12969	1.27891	0.781914	-0.354919	1.123	5	DDB1_RAT	441	0	148	126781	0.6302	1.5868	1.16048	0.86171	-0.214726	1.246	2	DNA damage-binding protein 1 OS=Rattus norvegicus GN=Ddb1 PE=1 SV=1	-0.314337	0.0867567	0.804221	1.06198	207	3.66667
MIC60_RAT	67135	74	1	897	0.9366	1.06769	1.14025	0.876988	-0.189371	1.057	12	MIC60_RAT	57	0	982	67135	0.7824	1.27812	1.13039	0.88465	-0.176822	1.095	9	MIC60_RAT	81	1	867	67135	0.8237	1.21403	1.5168	0.659281	-0.601035	1.068	10	MICOS complex subunit Mic60 (Fragment) OS=Rattus norvegicus GN=Immt PE=1 SV=1	-0.322409	0.241379	0.799733	1.18212	208	10.3333
FARP1_RAT	118768	66		1016	1.009	0.99108	1.22839	0.81406	-0.296793	1.055	10	FARP1_RAT	106	0	630	118768	0.9497	1.05296	1.3721	0.728809	-0.456387	1.099	7	FARP1_RAT	146	0	550	118768	0.6313	1.58403	1.16251	0.860208	-0.217242	1.145	6	FERM, RhoGEF and pleckstrin domain-containing protein 1 OS=Rattus norvegicus GN=Farp1 PE=1 SV=2	-0.323474	0.121785	0.799143	1.08808	209	7.66667
SYRC_RAT	75762	185		404	0.8832	1.13225	1.07524	0.930012	-0.104679	1.09	4	SYRC_RAT	201	0	326	75762	0.859	1.16414	1.24106	0.805763	-0.311573	1.072	4	SYRC_RAT	227	0	352	75762	0.8033	1.24486	1.47924	0.676023	-0.564855	1.129	3	Arginine--tRNA ligase, cytoplasmic OS=Rattus norvegicus GN=Rars PE=1 SV=2	-0.327036	0.230478	0.797173	1.17322	210	3.66667
PRC2A_RAT	228908	190		398	0.9853	1.01492	1.19954	0.833641	-0.262501	1.01	3	PRC2A_RAT	187	0	349	228908	0.7632	1.31027	1.10265	0.906905	-0.140976	1.162	5	PRC2A_RAT	268	0	290	228908	0.819	1.221	1.50815	0.663064	-0.59278	1.1	3	Protein PRRC2A OS=Rattus norvegicus GN=Prrc2a PE=1 SV=1	-0.332086	0.233801	0.794387	1.17593	211	3.66667
CSDE1_RAT	88839	219		323	0.8521	1.17357	1.03738	0.963956	-0.0529611	1.11	4	CSDE1_RAT	269	0	246	88839	0.8524	1.17316	1.23152	0.812001	-0.300446	1.189	3	CSDE1_RAT	312	0	236	88839	0.8512	1.17481	1.56744	0.637981	-0.648415	1.098	5	Cold shock domain-containing protein E1 OS=Rattus norvegicus GN=Csde1 PE=2 SV=1	-0.333941	0.299136	0.793367	1.23041	212	4
KPCG_RAT	78307	99		709	1.027	0.97371	1.2503	0.799792	-0.322303	1.099	10	KPCG_RAT	126	1	537	78307	0.7427	1.34644	1.07303	0.931938	-0.101695	1.051	12	KPCG_RAT	150	0	521	78307	0.8282	1.20744	1.52509	0.655698	-0.608896	1.048	8	Protein kinase C gamma type OS=Rattus norvegicus GN=Prkcg PE=1 SV=1	-0.344298	0.254315	0.787691	1.19277	213	10
RL7A_RAT	29977	54		1132	1.197	0.835422	1.45727	0.686204	-0.54329	1.172	15	RL7A_RAT	82	0	755	29977	0.853	1.17233	1.23239	0.81143	-0.301461	1.073	14	RL7A_RAT	53	0	1252	29977	0.6212	1.60979	1.14391	0.874194	-0.193974	1.063	14	60S ribosomal protein L7a OS=Rattus norvegicus GN=Rpl7a PE=1 SV=2	-0.346242	0.178911	0.786631	1.13203	214	14.3333
MYO5A_RAT	211630	36		1473	1.009	0.99108	1.22839	0.81406	-0.296793	1.05	12	MYO5A_RAT	41	0	1244	211630	0.808	1.23762	1.16738	0.856621	-0.223271	1.055	15	MYO5A_RAT	55	0	1227	211630	0.7876	1.26968	1.45033	0.689499	-0.53638	1.06	15	Unconventional myosin-Va OS=Rattus norvegicus GN=Myo5a PE=1 SV=1	-0.352148	0.16373	0.783417	1.12018	215	14
RLA0_RAT	34194	42		1381	1.009	0.99108	1.22839	0.81406	-0.296793	1.255	12	RLA0_RAT	35	0	1381	34194	0.8276	1.20831	1.19569	0.836334	-0.257849	1.227	11	RLA0_RAT	30	0	1814	34194	0.7912	1.2639	1.45696	0.686362	-0.542959	1.427	18	60S acidic ribosomal protein P0 OS=Rattus norvegicus GN=Rplp0 PE=1 SV=2	-0.365867	0.154597	0.776002	1.11311	216	13.6667
MYH10_RAT	228824	68	1	998	1.052	0.95057	1.28074	0.780786	-0.357001	1.048	6	MYH10_RAT	49	1	1029	228824	0.7605	1.31492	1.09875	0.910125	-0.135864	1.118	9	MYH10_RAT	78	1	904	228824	0.8384	1.19275	1.54387	0.647721	-0.626555	1.1	7	Myosin-10 OS=Rattus norvegicus GN=Myh10 PE=1 SV=1	-0.37314	0.245744	0.7721	1.1857	217	7.33333
LYRIC_RAT	63931	109		650	1.029	0.971817	1.25274	0.798238	-0.325109	1.071	7	LYRIC_RAT	132	0	523	63931	0.8728	1.14574	1.261	0.793022	-0.334566	1.028	7	LYRIC_RAT	87	0	813	63931	0.7499	1.33351	1.3809	0.724162	-0.465615	1.029	8	Protein LYRIC OS=Rattus norvegicus GN=Mtdh PE=1 SV=2	-0.375097	0.0785332	0.771054	1.05594	218	7.33333
SRC8_RAT	56907	264		272	0.9957	1.00432	1.2122	0.824934	-0.277649	1.122	4	SRC8_RAT	164	0	422	56907	0.8541	1.17082	1.23398	0.810385	-0.30332	1.085	6	SRC8_RAT	181	0	446	56907	0.7949	1.25802	1.46377	0.683167	-0.54969	1.049	8	Src substrate cortactin OS=Rattus norvegicus GN=Cttn PE=1 SV=1	-0.376887	0.150201	0.770098	1.10972	219	6
RL13_RAT	24294	97		713	1.117	0.895255	1.35987	0.735351	-0.443496	1.312	5	RL13_RAT	84	0	746	24294	0.8551	1.16945	1.23543	0.809437	-0.305008	1.38	6	RL13_RAT	82	0	866	24294	0.7254	1.37855	1.33579	0.748621	-0.417693	1.575	8	60S ribosomal protein L13 OS=Rattus norvegicus GN=Rpl13 PE=1 SV=2	-0.388732	0.0736459	0.7638	1.05237	220	6.33333
TRIM3_RAT	80745	147	1	500	1.055	0.947867	1.28439	0.778566	-0.361109	1.032	7	TRIM3_RAT	161	1	430	80745	0.7935	1.26024	1.14643	0.872275	-0.197146	1.043	7	TRIM3_RAT	203	0	402	80745	0.8334	1.1999	1.53467	0.651607	-0.617926	1.013	6	Tripartite motif-containing protein 3 OS=Rattus norvegicus GN=Trim3 PE=1 SV=1	-0.39206	0.212091	0.762041	1.15837	221	6.66667
HSP72_RAT	69599	15	3	1217	1.033	0.968054	1.25761	0.795147	-0.330707	1.093	8	HSP72_RAT	23	3	658	69599	0.7952	1.25755	1.14888	0.87041	-0.200233	1.193	7	HSP72_RAT	16	3	993	69599	0.8496	1.17702	1.5645	0.639182	-0.6457	1.036	8	Heat shock-related 70 kDa protein 2 OS=Rattus norvegicus GN=Hspa2 PE=1 SV=2	-0.392213	0.229014	0.76196	1.17203	222	7.66667
RL10_RAT	24588	248		287	1.353	0.739098	1.64719	0.607086	-0.720028	1.066	6	RL10_RAT	121	0	551	24588	0.9936	1.00644	1.43553	0.696608	-0.52158	1.065	6	RL10_RAT	134	0	583	24588	0.525	1.90476	0.966762	1.03438	0.0487661	1.144	7	60S ribosomal protein L10 OS=Rattus norvegicus GN=Rpl10 PE=1 SV=3	-0.397614	0.399108	0.759113	1.31869	223	6.33333
ANK3_RAT	284266	60		1068	1.022	0.978474	1.24422	0.803705	-0.315262	1.091	7	ANK3_RAT	39	0	1291	284266	0.9202	1.08672	1.32948	0.752173	-0.410863	1.326	5	ANK3_RAT	42	0	1526	284266	0.7545	1.32538	1.38937	0.719747	-0.474437	1.074	10	Ankyrin-3 OS=Rattus norvegicus GN=Ank3 PE=1 SV=3	-0.400187	0.080123	0.75776	1.05711	224	7.33333
EIF3D_RAT	63948	241		295	1.172	0.853242	1.42683	0.700842	-0.512839	1.143	4	EIF3D_RAT	223	0	301	63948	0.9494	1.0533	1.37167	0.729039	-0.455931	1.301	3	EIF3D_RAT	287	0	269	63948	0.6402	1.56201	1.1789	0.84825	-0.237439	1.033	3	Eukaryotic translation initiation factor 3 subunit D OS=Rattus norvegicus GN=Eif3d PE=1 SV=1	-0.40207	0.145386	0.756772	1.10603	225	3.33333
HS105_RAT	96357	29	1	1675	2.034	0.491642	2.47626	0.403828	-1.30819	1.662	12	HS105_RAT	74	1	812	96357	0.6427	1.55594	0.928556	1.07694	0.106939	1.268	9	HS105_RAT	67	1	1053	96357	0.5541	1.80473	1.02035	0.980057	-0.0290628	1.373	10	Heat shock protein 105 kDa OS=Rattus norvegicus GN=Hsph1 PE=1 SV=1	-0.410103	0.78073	0.75257	1.718	226	10.3333
RL18_RAT	21645	48		1261	1.283	0.779423	1.56197	0.640208	-0.643388	1.069	7	RL18_RAT	40	0	1244	21645	0.9292	1.07619	1.34248	0.744888	-0.424904	1.069	8	RL18_RAT	31	0	1811	21645	0.6166	1.6218	1.13544	0.880716	-0.183251	1.109	10	60S ribosomal protein L18 OS=Rattus norvegicus GN=Rpl18 PE=1 SV=2	-0.417181	0.230165	0.748886	1.17297	227	8.33333
RACK1_RAT	35055	53		1142	0.9337	1.07101	1.13672	0.879712	-0.184897	1.165	17	RACK1_RAT	44	0	1223	35055	0.8208	1.21832	1.18587	0.843263	-0.245946	1.128	16	RACK1_RAT	51	0	1269	35055	0.9597	1.04199	1.76724	0.565853	-0.8215	1.467	13	Receptor of activated protein C kinase 1 OS=Rattus norvegicus GN=Rack1 PE=1 SV=3	-0.417448	0.351248	0.748748	1.27566	228	15.3333
TDRD3_RAT	72983	214		329	1.019	0.981354	1.24056	0.806071	-0.31102	1.108	4	TDRD3_RAT	390	0	141	72983	0.7981	1.25298	1.15307	0.867247	-0.205485	1.165	3	TDRD3_RAT	271	0	289	72983	0.9087	1.10047	1.67333	0.597611	-0.742721	1.084	3	Tudor domain-containing protein 3 OS=Rattus norvegicus GN=Tdrd3 PE=1 SV=1	-0.419742	0.284642	0.747558	1.21811	229	3.33333
NUCL_RAT	77101	41		1395	1.177	0.849618	1.43292	0.697865	-0.518981	1.149	18	NUCL_RAT	75	0	810	77101	0.9985	1.0015	1.44261	0.69319	-0.528678	1.129	14	NUCL_RAT	39	0	1567	77101	0.6382	1.56691	1.17521	0.850908	-0.232925	1.088	21	Nucleolin OS=Rattus norvegicus GN=Ncl PE=1 SV=3	-0.426861	0.168024	0.743878	1.12352	230	17.6667
RL9_RAT	21880	328		198	1.371	0.729395	1.6691	0.599115	-0.739095	1.094	5	RL9_RAT	167	0	402	21880	0.9162	1.09146	1.3237	0.755457	-0.404578	1.043	5	RL9_RAT	256	0	301	21880	0.5973	1.6742	1.0999	0.909174	-0.137372	1.13	5	60S ribosomal protein L9 OS=Rattus norvegicus GN=Rpl9 PE=1 SV=1	-0.427015	0.301488	0.743799	1.23242	231	5
RL5_RAT	34437	37		1466	0.9571	1.04482	1.16521	0.858204	-0.220608	1.162	14	RL5_RAT	33	0	1429	34437	0.8309	1.20351	1.20046	0.833012	-0.26359	1.133	13	RL5_RAT	29	0	1833	34437	0.9503	1.0523	1.74993	0.571451	-0.807299	1.224	20	60S ribosomal protein L5 OS=Rattus norvegicus GN=Rpl5 PE=1 SV=3	-0.430499	0.327026	0.742005	1.25442	232	15.6667
DHX30_RAT	133913	28		1684	1.176	0.85034	1.4317	0.698458	-0.517754	1.058	25	DHX30_RAT	48	0	1115	133913	1.01	0.990099	1.45922	0.685297	-0.545199	1.052	28	DHX30_RAT	41	0	1551	133913	0.6392	1.56446	1.17706	0.849577	-0.235184	1.04	29	Putative ATP-dependent RNA helicase DHX30 OS=Rattus norvegicus GN=Dhx30 PE=1 SV=1	-0.432712	0.171614	0.740868	1.12632	233	27.3333
GPX1_RAT	22292	372		163	1.364	0.733138	1.66058	0.60219	-0.73171	1.128	3	GPX1_RAT	219	0	308	22292	1.075	0.930233	1.55313	0.64386	-0.63518	1.028	6	GPX1_RAT	326	0	226	22292	0.5178	1.93125	0.953503	1.04876	0.0686886	1.155	6	Glutathione peroxidase 1 OS=Rattus norvegicus GN=Gpx1 PE=1 SV=4	-0.432734	0.436919	0.740857	1.35371	234	5
SPTN2_RAT	270897	80		844	1.152	0.868056	1.40248	0.713009	-0.488007	1.144	7	SPTN2_RAT	52	0	1004	270897	0.8407	1.18948	1.21462	0.823302	-0.280506	1.113	6	SPTN2_RAT	66	0	1065	270897	0.7996	1.25063	1.47242	0.679151	-0.558195	1.134	7	Spectrin beta chain, non-erythrocytic 2 OS=Rattus norvegicus GN=Sptbn2 PE=1 SV=2	-0.442236	0.144392	0.735993	1.10526	235	6.66667
SPTN1_RAT	284462	12		3396	1.148	0.87108	1.39761	0.715494	-0.482989	1.025	41	SPTN1_RAT	12	1	2903	284462	0.8473	1.18022	1.22416	0.816889	-0.291788	1.026	38	SPTN1_RAT	13	0	2997	284462	0.8156	1.22609	1.50189	0.665828	-0.586778	1.034	35	Spectrin alpha chain, non-erythrocytic 1 OS=Rattus norvegicus GN=Sptan1 PE=1 SV=2	-0.453852	0.149638	0.730091	1.10929	236	38
DNA2_RAT	119512	565		73	1.08	0.925926	1.31483	0.760543	-0.394898	1.011	2	DNA2_RAT	702	0	43	119512	0.9924	1.00766	1.43379	0.697451	-0.519837	1.028	2	DNA2_RAT	926	0	26	119512	0.7413	1.34898	1.36507	0.732564	-0.448974	1.079	2	DNA replication ATP-dependent helicase/nuclease DNA2 OS=Rattus norvegicus GN=Dna2 PE=3 SV=1	-0.45457	0.0626573	0.729728	1.04439	237	2
NPM_RAT	32540	84		799	1.14	0.877193	1.38787	0.720515	-0.4729	1.286	7	NPM_RAT	87	0	715	32540	0.9578	1.04406	1.3838	0.722646	-0.46864	1.429	6	NPM_RAT	97	1	752	32540	0.7295	1.3708	1.34334	0.744413	-0.425824	1.286	7	Nucleophosmin OS=Rattus norvegicus GN=Npm1 PE=1 SV=1	-0.455788	0.0260366	0.729112	1.01821	238	6.66667
HSP7C_RAT	70827	15	1	2541	1.088	0.919118	1.32457	0.754951	-0.405545	1.031	20	HSP7C_RAT	23	1	1684	70827	0.8852	1.12969	1.27891	0.781914	-0.354919	1.53	24	HSP7C_RAT	16	1	2496	70827	0.8282	1.20744	1.52509	0.655698	-0.608896	1.048	28	Heat shock cognate 71 kDa protein OS=Rattus norvegicus GN=Hspa8 PE=1 SV=1	-0.456453	0.134424	0.728776	1.09765	239	24
HMGCL_RAT	34170	186		403	1.005	0.995025	1.22352	0.8173	-0.291062	1.089	10	HMGCL_RAT	210	0	315	34170	0.8534	1.17178	1.23297	0.81105	-0.302137	1.073	8	HMGCL_RAT	154	0	516	34170	0.9387	1.0653	1.72857	0.578512	-0.789581	1.032	6	Hydroxymethylglutaryl-CoA lyase, mitochondrial OS=Rattus norvegicus GN=Hmgcl PE=2 SV=1	-0.460927	0.284677	0.726519	1.21814	240	8
RL7_RAT	30310	58		1072	1.136	0.880282	1.383	0.723052	-0.467829	1.089	17	RL7_RAT	69	0	852	30310	0.8647	1.15647	1.2493	0.800451	-0.321115	1.107	16	RL7_RAT	63	0	1095	30310	0.8318	1.20221	1.53172	0.652861	-0.615153	1.058	18	60S ribosomal protein L7 OS=Rattus norvegicus GN=Rpl7 PE=1 SV=2	-0.468032	0.147019	0.72295	1.10728	241	17
FXR1_RAT	63908	81	2	763	1.123	0.890472	1.36718	0.731422	-0.451224	1.088	11	FXR1_RAT	70	2	710	63908	0.8872	1.12714	1.2818	0.780151	-0.358175	1.083	8	FXR1_RAT	74	2	771	63908	0.8388	1.19218	1.54461	0.647412	-0.627243	1.043	12	Fragile X mental retardation syndrome-related protein 1 OS=Rattus norvegicus GN=Fxr1 PE=1 SV=1	-0.478881	0.13665	0.717534	1.09935	242	10.3333
HS71A_RAT	70142	15	4	702	1.051	0.951475	1.27952	0.781529	-0.355629	1.484	3	HS71A_RAT	23	4	359	70142	0.9122	1.09625	1.31792	0.75877	-0.398265	1.283	3	HS71A_RAT	16	4	375	70142	0.8717	1.14718	1.60519	0.622977	-0.682748	1.039	4	Heat shock 70 kDa protein 1A OS=Rattus norvegicus GN=Hspa1a PE=2 SV=1	-0.478881	0.177837	0.717534	1.13119	243	3.33333
ARHG2_RAT	111840	22		1896	1.181	0.84674	1.43779	0.695501	-0.523875	1.139	31	ARHG2_RAT	38	0	1319	111840	1.029	0.971817	1.48667	0.672643	-0.572086	1.037	24	ARHG2_RAT	45	0	1392	111840	0.6925	1.44404	1.2752	0.784187	-0.350731	1.051	24	Rho guanine nucleotide exchange factor 2 OS=Rattus norvegicus GN=Arhgef2 PE=1 SV=1	-0.482231	0.116406	0.71587	1.08403	244	26.3333
RL15_RAT	24131	239		299	1.481	0.675219	1.80302	0.554616	-0.850438	1.208	9	RL15_RAT	142	0	477	24131	1.016	0.984252	1.46789	0.68125	-0.553744	1.197	11	RL15_RAT	221	0	372	24131	0.5617	1.78031	1.03434	0.966796	-0.0487162	1.234	6	60S ribosomal protein L15 OS=Rattus norvegicus GN=Rpl15 PE=1 SV=2	-0.484299	0.405347	0.714844	1.32441	245	8.66667
RL19_RAT	23451	92		740	1.348	0.74184	1.6411	0.609337	-0.714687	1.109	4	RL19_RAT	128	0	528	23451	0.8687	1.15115	1.25507	0.796765	-0.327773	1.068	4	RL19_RAT	137	0	576	23451	0.7274	1.37476	1.33947	0.746562	-0.421665	1.236	6	60S ribosomal protein L19 OS=Rattus norvegicus GN=Rpl19 PE=1 SV=1	-0.488042	0.201817	0.712992	1.15015	246	4.66667
AGO2_RAT	97256	57		1075	1.182	0.846024	1.43901	0.694913	-0.525096	1.04	11	AGO2_RAT	91	0	687	97256	0.9722	1.02859	1.40461	0.711942	-0.490168	1.088	8	AGO2_RAT	101	0	736	97256	0.7965	1.25549	1.46672	0.681795	-0.552591	1.035	14	Protein argonaute-2 OS=Rattus norvegicus GN=Ago2 PE=2 SV=2	-0.522619	0.0312849	0.696107	1.02192	247	11
EIF3I_RAT	36438	457		115	1.1	0.909091	1.33918	0.746715	-0.42137	1.114	3	EIF3I_RAT	308	0	211	36438	0.7362	1.35833	1.06364	0.940166	-0.089013	1.027	3	EIF3I_RAT	263	0	294	36438	1.131	0.884173	2.08268	0.48015	-1.05844	1.025	4	Eukaryotic translation initiation factor 3 subunit I OS=Rattus norvegicus GN=Eif3i PE=2 SV=1	-0.522942	0.492632	0.695951	1.40701	248	3.33333
CAPR1_RAT	78073	47		1273	1.085	0.921659	1.32092	0.757038	-0.401561	1.084	11	CAPR1_RAT	36	0	1355	78073	0.9352	1.06929	1.35115	0.740109	-0.43419	1.164	12	CAPR1_RAT	69	0	1001	78073	0.9069	1.10266	1.67001	0.598797	-0.73986	1.06	14	Caprin-1 OS=Rattus norvegicus GN=Caprin1 PE=1 SV=2	-0.525204	0.186612	0.694861	1.13809	249	12.3333
RS3A_RAT	29926	89		755	1.077	0.928505	1.31118	0.762662	-0.390885	1.183	15	RS3A_RAT	76	0	805	29926	0.9975	1.00251	1.44116	0.693885	-0.527232	1.171	12	RS3A_RAT	37	0	1576	29926	0.8778	1.13921	1.61643	0.618648	-0.692809	1.208	18	40S ribosomal protein S3a OS=Rattus norvegicus GN=Rps3a PE=1 SV=2	-0.536975	0.151198	0.689214	1.11049	250	15
KIF2A_RAT	79743	129		559	1.097	0.911577	1.33552	0.748757	-0.41743	1.043	9	KIF2A_RAT	154	0	450	79743	0.9327	1.07216	1.34754	0.742093	-0.430328	1.094	11	KIF2A_RAT	129	0	606	79743	0.9354	1.06906	1.72249	0.580553	-0.7845	1.036	9	Kinesin-like protein KIF2A OS=Rattus norvegicus GN=Kif2a PE=1 SV=2	-0.544086	0.208304	0.685826	1.15533	251	9.66667
ZFR_RAT	116745	440		124	1.237	0.808407	1.50597	0.664015	-0.590712	1.121	2	ZFR_RAT	616	0	57	116745	1.218	0.821018	1.75973	0.568268	-0.815358	1.071	2	ZFR_RAT	331	0	219	116745	0.6565	1.52323	1.20891	0.827189	-0.273711	1.631	2	Zinc finger RNA-binding protein OS=Rattus norvegicus GN=Zfr PE=1 SV=2	-0.559927	0.272132	0.678337	1.20759	252	2
AGAP2_RAT	124361	85		782	1.081	0.925069	1.31605	0.75984	-0.396233	1.039	12	AGAP2_RAT	93	0	685	124361	1.134	0.881834	1.63837	0.610362	-0.712264	1.457	6	AGAP2_RAT	50	0	1289	124361	0.8308	1.20366	1.52988	0.653646	-0.613418	1.337	12	Arf-GAP with GTPase, ANK repeat and PH domain-containing protein 2 OS=Rattus norvegicus GN=Agap2 PE=1 SV=1	-0.573972	0.161666	0.671765	1.11858	253	10
RS6_RAT	28663	59		1071	1.499	0.667111	1.82493	0.547956	-0.867867	1.245	9	RS6_RAT	79	0	797	28663	0.9511	1.05141	1.37412	0.727736	-0.458512	1.093	9	RS6_RAT	54	0	1236	28663	0.7145	1.39958	1.31572	0.760041	-0.39585	1.063	14	40S ribosomal protein S6 OS=Rattus norvegicus GN=Rps6 PE=1 SV=1	-0.574077	0.256352	0.671716	1.19445	254	10.6667
PHAR1_RAT	66175	128		561	1.02	0.980392	1.24178	0.805281	-0.312436	1.179	8	PHAR1_RAT	124	0	538	66175	1.046	0.956023	1.51123	0.661711	-0.595726	1.092	6	PHAR1_RAT	85	0	830	66175	0.9621	1.03939	1.77166	0.564442	-0.825103	1.048	6	Phosphatase and actin regulator 1 OS=Rattus norvegicus GN=Phactr1 PE=1 SV=1	-0.577755	0.256806	0.670006	1.19483	255	6.66667
FMR1_RAT	66740	81	1	832	1.154	0.866551	1.40492	0.711774	-0.49051	1.074	12	FMR1_RAT	70	1	831	66740	0.9776	1.02291	1.41241	0.708009	-0.49816	1.076	11	FMR1_RAT	74	1	938	66740	0.9112	1.09745	1.67793	0.595972	-0.746684	1.055	11	Synaptic functional regulator FMR1 OS=Rattus norvegicus GN=Fmr1 PE=1 SV=2	-0.578451	0.145744	0.669682	1.1063	256	11.3333
BSN_RAT	418168	35		1474	1.118	0.894454	1.36109	0.734693	-0.444787	1.117	10	BSN_RAT	29	1	1488	418168	1.362	0.734214	1.96778	0.508186	-0.97657	1.198	11	BSN_RAT	62	0	1100	418168	0.6773	1.47645	1.24721	0.801786	-0.318711	1.146	5	Protein bassoon OS=Rattus norvegicus GN=Bsn PE=1 SV=3	-0.580023	0.349158	0.668953	1.27382	257	8.66667
HP1B3_RAT	60769	130		556	1.324	0.755287	1.61188	0.620383	-0.68877	1.066	9	HP1B3_RAT	100	0	657	60769	0.9178	1.08956	1.32601	0.75414	-0.407095	1.034	9	HP1B3_RAT	200	0	407	60769	0.8896	1.1241	1.63815	0.610442	-0.712073	1.037	13	Heterochromatin protein 1-binding protein 3 OS=Rattus norvegicus GN=Hp1bp3 PE=1 SV=1	-0.602646	0.169752	0.658545	1.12487	258	10.3333
MECP2_RAT	53015	153		479	1.238	0.807754	1.50718	0.663479	-0.591878	1.113	6	MECP2_RAT	174	0	376	53015	0.9561	1.04592	1.38135	0.723931	-0.466077	1.135	4	MECP2_RAT	199	0	408	53015	0.9179	1.08944	1.69027	0.591622	-0.757253	1.023	4	Methyl-CpG-binding protein 2 OS=Rattus norvegicus GN=Mecp2 PE=1 SV=1	-0.605069	0.146036	0.65744	1.10652	259	4.66667
PABP1_RAT	70656	21		1897	1.18	0.847458	1.43657	0.69609	-0.522653	1.034	29	PABP1_RAT	20	0	1781	70656	1.042	0.959693	1.50545	0.664251	-0.590199	1.09	26	PABP1_RAT	27	0	1856	70656	0.8951	1.11719	1.64828	0.606691	-0.720965	1.031	31	Polyadenylate-binding protein 1 OS=Rattus norvegicus GN=Pabpc1 PE=1 SV=1	-0.611272	0.100822	0.654619	1.07238	260	28.6667
E41L1_RAT	98182	45		1304	1.376	0.726744	1.67519	0.596938	-0.744347	1.173	13	E41L1_RAT	51	0	1005	98182	0.9053	1.10461	1.30795	0.764553	-0.387311	1.049	10	E41L1_RAT	86	0	820	98182	0.8841	1.13109	1.62803	0.61424	-0.703126	1.051	7	Band 4.1-like protein 1 OS=Rattus norvegicus GN=Epb41l1 PE=1 SV=1	-0.611595	0.195326	0.654473	1.14498	261	10
SYTL5_RAT	83593	118		612	1.429	0.69979	1.73971	0.574798	-0.798872	1.16	6	SYTL5_RAT	149	0	457	83593	0.8671	1.15327	1.25276	0.798235	-0.325114	1.147	5	SYTL5_RAT	329	0	221	83593	0.9043	1.10583	1.66522	0.600519	-0.735718	1.094	3	Synaptotagmin-like protein 5 OS=Rattus norvegicus GN=Sytl5 PE=2 SV=1	-0.619901	0.257239	0.650715	1.19519	262	4.66667
CXA1_RAT	43004	750		36	1.136	0.880282	1.383	0.723052	-0.467829	1.43	2	CXA1_RAT	619	0	57	43004	1.38	0.724638	1.99379	0.501558	-0.995512	1.413	3	CXA1_RAT	671	0	65	43004	0.7469	1.33887	1.37538	0.727071	-0.459832	1.283	4	Gap junction alpha-1 protein OS=Rattus norvegicus GN=Gja1 PE=1 SV=2	-0.641057	0.306992	0.641243	1.23713	263	3
MAP1A_RAT	299348	2	1	19345	1.169	0.855432	1.42318	0.70264	-0.509141	1.072	131	MAP1A_RAT	2	1	15391	299348	0.9706	1.03029	1.4023	0.713116	-0.487792	1.05	129	MAP1A_RAT	2	1	17184	299348	1.033	0.968054	1.90222	0.525701	-0.927685	1.055	145	Microtubule-associated protein 1A OS=Rattus norvegicus GN=Map1a PE=1 SV=1	-0.641539	0.248039	0.641029	1.18759	264	135
CLH1_RAT	191477	16		2455	1.202	0.831947	1.46336	0.68335	-0.549303	1.029	38	CLH1_RAT	27	0	1513	191477	1.121	0.892061	1.61959	0.61744	-0.69563	1.044	34	CLH1_RAT	22	0	2156	191477	0.9175	1.08992	1.68953	0.59188	-0.756625	1.032	28	Clathrin heavy chain 1 OS=Rattus norvegicus GN=Cltc PE=1 SV=3	-0.667186	0.106547	0.629734	1.07665	265	33.3333
VIGLN_RAT	141496	55		1112	1.286	0.777605	1.56562	0.638714	-0.646757	1.05	12	VIGLN_RAT	101	0	654	141496	1.066	0.938086	1.54013	0.649296	-0.623051	1.067	13	VIGLN_RAT	56	0	1209	141496	0.9039	1.10632	1.66449	0.600785	-0.73508	1.027	20	Vigilin OS=Rattus norvegicus GN=Hdlbp PE=1 SV=1	-0.668296	0.0590386	0.62925	1.04177	266	15
CAMKV_RAT	54072	298		230	1.278	0.782473	1.55588	0.642713	-0.637754	1.1	6	CAMKV_RAT	285	0	231	54072	1.245	0.803213	1.79874	0.555944	-0.846989	1.102	4	CAMKV_RAT	198	0	409	54072	0.988	1.01215	1.81935	0.549645	-0.863427	1.106	8	CaM kinase-like vesicle-associated protein OS=Rattus norvegicus GN=Camkv PE=1 SV=1	-0.782724	0.125816	0.581268	1.09112	267	6
ITPR1_RAT	313065	107	1	659	1.36	0.735294	1.65571	0.603961	-0.727473	1.13	3	ITPR1_RAT	94	1	679	313065	0.967	1.03413	1.3971	0.71577	-0.482431	1.03	5	ITPR1_RAT	152	0	519	313065	1.223	0.817661	2.25209	0.444031	-1.17127	1.053	5	Inositol 1,4,5-trisphosphate receptor type 1 OS=Rattus norvegicus GN=Itpr1 PE=1 SV=2	-0.793724	0.349165	0.576853	1.27382	268	4.33333
SYVC_RAT	140280	156		469	1.282	0.780031	1.56075	0.640707	-0.642263	1.073	4	SYVC_RAT	199	0	329	140280	1.187	0.84246	1.71495	0.583109	-0.778163	1.141	4	SYVC_RAT	119	1	626	140280	1.076	0.929368	1.9814	0.504693	-0.986523	1.054	3	Valine--tRNA ligase OS=Rattus norvegicus GN=Vars PE=2 SV=2	-0.802316	0.173396	0.573428	1.12771	269	3.66667
SRSF2_RAT	25461	93		728	1.513	0.660939	1.84198	0.542886	-0.881278	1.111	3	SRSF2_RAT	146	0	470	25461	1.033	0.968054	1.49245	0.670039	-0.577684	1.157	3	SRSF2_RAT	153	0	516	25461	1.059	0.944287	1.9501	0.512795	-0.963547	1.094	4	Serine/arginine-rich splicing factor 2 OS=Rattus norvegicus GN=Srsf2 PE=1 SV=3	-0.807503	0.203236	0.57137	1.15128	270	3.33333
TENR_RAT	149277	105		678	1.462	0.683995	1.77989	0.561824	-0.83181	1.105	7	TENR_RAT	95	0	670	149277	1.237	0.808407	1.78718	0.559539	-0.837689	1.29	4	TENR_RAT	91	1	791	149277	0.9705	1.0304	1.78713	0.559556	-0.837645	1.061	4	Tenascin-R OS=Rattus norvegicus GN=Tnr PE=1 SV=1	-0.835714	0.00338162	0.560306	1.00235	271	5
EIF3C_RAT	105369	122		594	1.571	0.636537	1.91259	0.522843	-0.93555	1.056	7	EIF3C_RAT	137	0	498	105369	1.442	0.693481	2.08336	0.479993	-1.05891	1.134	6	EIF3C_RAT	139	0	571	105369	0.7851	1.27372	1.44572	0.691695	-0.531793	1.097	8	Eukaryotic translation initiation factor 3 subunit C OS=Rattus norvegicus GN=Eif3c PE=1 SV=1	-0.842086	0.27571	0.557837	1.21059	272	7
GLO2_RAT	34088	312		212	0.9376	1.06655	1.14147	0.876052	-0.190911	1.121	5	GLO2_RAT	255	0	262	34088	3.119	0.320616	4.50625	0.221914	-2.17193	1.621	6	GLO2_RAT	401	0	165	34088	0.7198	1.38927	1.32548	0.754445	-0.406513	1.063	4	Hydroxyacylglutathione hydrolase, mitochondrial OS=Rattus norvegicus GN=Hagh PE=1 SV=2	-0.923117	1.08686	0.527368	2.12411	273	5
UBP10_RAT	87257	62		1034	2.484	0.402576	3.02411	0.330671	-1.59653	1.913	12	UBP10_RAT	85	0	735	87257	0.9234	1.08295	1.3341	0.749567	-0.415871	1.371	11	UBP10_RAT	138	0	573	87257	0.988	1.01215	1.81935	0.549645	-0.863427	1.201	12	Ubiquitin carboxyl-terminal hydrolase 10 OS=Rattus norvegicus GN=Usp10 PE=1 SV=1	-0.95861	0.596058	0.514552	1.51158	274	11.6667
EIF3A_RAT	163097	101		694	1.662	0.601685	2.02337	0.494216	-1.01679	1.038	12	EIF3A_RAT	115	0	576	163097	1.602	0.62422	2.31453	0.432054	-1.21072	1.036	14	EIF3A_RAT	65	0	1067	163097	1.254	0.797448	2.30918	0.433054	-1.20738	1.043	21	Eukaryotic translation initiation factor 3 subunit A OS=Rattus norvegicus GN=Eif3a PE=2 SV=2	-1.14496	0.111016	0.452202	1.07999	275	15.6667
EIF3B_RAT	90854	102		693	2.169	0.461042	2.64061	0.378694	-1.4009	1.186	8	EIF3B_RAT	349	0	167	90854	1.709	0.585138	2.46912	0.405003	-1.304	1.297	4	EIF3B_RAT	239	0	337	90854	1.299	0.769823	2.39204	0.418052	-1.25825	1.362	5	Eukaryotic translation initiation factor 3 subunit B OS=Rattus norvegicus GN=Eif3b PE=1 SV=1	-1.32105	0.0728377	0.400245	1.05178	276	5.66667
LIPA3_RAT	133347	88	1	764	1.916	0.521921	2.3326	0.428699	-1.22196	1.159	8	LIPA3_RAT	98	1	659	133347	1.664	0.600962	2.4041	0.415956	-1.2655	1.06	5	LIPA3_RAT	71	1	972	133347	1.664	0.600962	3.06417	0.326352	-1.6155	1.026	11	Liprin-alpha-3 OS=Rattus norvegicus GN=Ppfia3 PE=1 SV=2	-1.36765	0.215742	0.387521	1.1613	277	8
LUZP1_RAT	117105	70		971	1.485	0.673401	1.80789	0.553122	-0.854329	1.038	5	LUZP1_RAT	46	0	1200	117105	4.48	0.223214	6.47259	0.154498	-2.69434	1.25	6	LUZP1_RAT	25	0	1962	117105	2.742	0.364697	5.04926	0.198049	-2.33607	1.489	11	Leucine zipper protein 1 OS=Rattus norvegicus GN=Luzp1 PE=1 SV=1	-1.96158	0.975497	0.256747	1.96632	278	7.33333

## Sheet: Figure 2 - Source Data 1
Figure 2 - Source Data 1. List of quantified proteins from 3 independet pulldown experiments using GST-fusion constructs of PSD-95 C-terminal domains from crude rat synaptosome preparations (Light = GST-GK , Heavy = GST-SH3-GK ; 16O/18O-ratios (L/H) according to the Mascot Distiller software (version 2.6.3.0 [Matrix Science Ltd, London, UK]).
Summary (n=3)								Replicate 1						Replicate 2						Replicate 3
Protein Accession	MW [Da]	Protein rank by L/H Ratio	mean L/H Ratio	LOG2 mean L/H Ratio	mean L/H Ratio Standard Deviation	mean peptide count	Protein Description	Hit number	Protein group member	Mascot Score	L/H Ratio normalized	Standard deviation	peptide count	Hit number	Protein group member	Mascot Score	L/H Ratio normalized	Standard deviation	peptide count	Hit number	Protein group member	Mascot Score	L/H Ratio normalized	Standard deviation	peptide count
SORT_RAT	91111	1	11.9402	3.57775	1.1522	3.33333	Sortilin OS=Rattus norvegicus GN=Sort1 PE=1 SV=3	208		340	12.3628	1.501	4	197		332	13.4764	1.646	4	339		212	10.2173	1.136	2
ARM10_RAT	33401	2	7.54643	2.9158	1.08624	2.33333	Armadillo repeat-containing protein 10 OS=Rattus norvegicus GN=Armc10 PE=1 SV=1	272		255	6.96681	1.181	2	206		319	7.50624	1.793	2	296		257	8.21806	1.28	3
KHDR1_RAT	48285	3	7.01499	2.81044	1.82279	3.66667	KH domain-containing, RNA-binding, signal transduction-associated protein 1 OS=Rattus norvegicus GN=Khdrbs1 PE=1 SV=1	364		169	4.32764	1.417	4	537		77	13.7386	1.823	3	519		107	5.80615	1.669	4
LGI1_RAT	63687	4	6.30658	2.65686	1.31566	2.33333	Leucine-rich glioma-inactivated protein 1 OS=Rattus norvegicus GN=Lgi1 PE=1 SV=1	194		390	7.81529	1.232	3	207		317	6.93259	1.328	2	276		284	4.62958	1.066	2
ACSL3_RAT	80406	5	5.66517	2.50212	1.67147	2.66667	Long-chain-fatty-acid--CoA ligase 3 OS=Rattus norvegicus GN=Acsl3 PE=1 SV=1	192	1	391	9.44666	1.146	2	192	1	341	5.69202	1.602	3	194	1	431	3.38138	1.28	3
TXTP_RAT	33814	6	5.04644	2.33527	1.30715	7.66667	Tricarboxylate transport protein, mitochondrial OS=Rattus norvegicus GN=Slc25a1 PE=1 SV=1	125		582	3.7268	1.128	8	109		617	5.56838	1.129	7	145		558	6.19283	1.21	8
SFXN3_RAT	35411	7	4.73926	2.24466	1.14856	10	Sideroflexin-3 OS=Rattus norvegicus GN=Sfxn3 PE=2 SV=1	114	1	628	4.30045	1.118	9	72	1	825	4.45686	1.127	11	105	1	695	5.55379	1.203	10
ADT2_RAT	32880	8	3.92762	1.97366	1.24127	21	ADP/ATP translocase 2 OS=Rattus norvegicus GN=Slc25a5 PE=1 SV=3	9	1	4494	3.31472	1.077	21	9	1	3926	3.64866	1.122	20	8	1	4319	5.00968	1.146	22
ADT1_RAT	32968	9	3.79101	1.92258	1.23638	17.6667	ADP/ATP translocase 1 OS=Rattus norvegicus GN=Slc25a4 PE=1 SV=3	9	2	4287	3.21986	1.072	18	9	2	3431	3.51167	1.123	18	8	2	3210	4.81854	1.098	17
AAPK1_RAT	63933	10	3.59475	1.84589	1.26432	5.33333	5'-AMP-activated protein kinase catalytic subunit alpha-1 OS=Rattus norvegicus GN=Prkaa1 PE=1 SV=2	140	1	529	3.04895	1.252	6	127	1	533	4.70211	1.111	5	151	1	520	3.24015	1.17	5
SFXN5_RAT	37281	11	3.45857	1.79017	1.36803	4.33333	Sideroflexin-5 OS=Rattus norvegicus GN=Sfxn5 PE=2 SV=1	155		473	2.93562	1.33	3	165		417	2.83901	1.327	5	189		440	4.96389	1.238	5
STXB1_RAT	67526	12	3.33842	1.73916	1.61173	3.33333	Syntaxin-binding protein 1 OS=Rattus norvegicus GN=Stxbp1 PE=1 SV=1	143		513	2.00338	1.163	4	158		435	3.6012	1.235	4	164		484	5.15716	1.823	2
MPCP_RAT	39419	13	3.00065	1.58527	1.26755	5.33333	Phosphate carrier protein, mitochondrial OS=Rattus norvegicus GN=Slc25a3 PE=1 SV=1	166		434	2.58135	1.287	6	195		336	2.65395	1.253	5	272		288	3.94371	1.187	5
ATAD3_RAT	66718	14	2.80241	1.48667	1.10693	4.66667	ATPase family AAA domain-containing protein 3 OS=Rattus norvegicus GN=Atad3 PE=1 SV=1	174		420	2.92413	1.094	6	291		225	3.0159	1.116	3	210		391	2.49563	1.103	5
PP2BB_RAT	59076	15	2.65823	1.41047	1.08642	5.33333	Serine/threonine-protein phosphatase 2B catalytic subunit beta isoform OS=Rattus norvegicus GN=Ppp3cb PE=1 SV=1	121	2	515	2.78153	1.071	6	117	2	483	2.79544	1.078	6	132	2	581	2.4157	1.097	4
PP2BA_RAT	58606	16	2.60713	1.38246	1.1171	4	Serine/threonine-protein phosphatase 2B catalytic subunit alpha isoform OS=Rattus norvegicus GN=Ppp3ca PE=1 SV=1	121	1	596	2.80432	1.229	4	117	1	560	2.75318	1.124	6	132	1	591	2.29522	1.085	2
ODPA_RAT	43199	17	2.60147	1.37933	1.14318	2.66667	Pyruvate dehydrogenase E1 component subunit alpha, somatic form, mitochondrial OS=Rattus norvegicus GN=Pdha1 PE=1 SV=2	373		163	2.86497	1.334	2	313		203	2.75209	1.354	3	298		256	2.23293	1.229	3
MOES_RAT	67697	18	2.55801	1.35502	1.36606	2.66667	Moesin OS=Rattus norvegicus GN=Msn PE=1 SV=3	428		128	2.55089	1.271	2	357		164	3.49924	1.219	3	394		172	1.87517	1.194	3
TECR_RAT	36099	19	2.49705	1.32022	1.37236	4.33333	Very-long-chain enoyl-CoA reductase OS=Rattus norvegicus GN=Tecr PE=1 SV=1	282		246	3.0433	1.308	3	246		271	2.9516	1.235	5	328		221	1.73332	1.487	5
C2D1A_RAT	103523	20	2.48249	1.31179	1.09477	10	Coiled-coil and C2 domain-containing protein 1A OS=Rattus norvegicus GN=Cc2d1a PE=1 SV=2	75	1	892	2.66338	1.058	7	97		662	2.24142	1.167	11	79		902	2.56276	1.121	12
INP4A_RAT	105522	21	2.46698	1.30274	1.80099	4	Type I inositol 3,4-bisphosphate 4-phosphatase OS=Rattus norvegicus GN=Inpp4a PE=1 SV=1	76		885	4.71519	1.416	4	83		749	1.4946	1.399	4	58		1165	2.13044	1.042	4
BRSK1_RAT	85130	22	2.35034	1.23287	1.06947	22.6667	Serine/threonine-protein kinase BRSK1 OS=Rattus norvegicus GN=Brsk1 PE=1 SV=1	23	1	1889	2.47406	1.08	22	34	1	1418	2.40915	1.072	23	38	1	1573	2.1783	1.109	23
DCX_RAT	40534	23	2.34383	1.22887	1.33057	2.33333	Neuronal migration protein doublecortin OS=Rattus norvegicus GN=Dcx PE=1 SV=2	24	3	207	1.87317	1.183	2	16	3	310	3.23284	1.347	3	23	3	237	2.12627	1.445	2
BRSK2_RAT	81403	24	2.33169	1.22138	1.08502	8.33333	Serine/threonine-protein kinase BRSK2 OS=Rattus norvegicus GN=Brsk2 PE=1 SV=1	23	2	365	2.54773	1.21	9	34	2	327	2.29341	1.085	8	38	2	434	2.16959	1.158	8
ATPG_RAT	30172	25	2.27116	1.18343	1.39015	4.66667	ATP synthase subunit gamma, mitochondrial OS=Rattus norvegicus GN=Atp5c1 PE=1 SV=2	215		329	1.62394	1.086	4	157		437	2.2995	1.103	4	201		404	3.1372	1.305	6
DCLK2_RAT	83964	26	2.23781	1.16209	1.21106	20.6667	Serine/threonine-protein kinase DCLK2 OS=Rattus norvegicus GN=Dclk2 PE=1 SV=2	24	1	1872	2.229	1.067	21	16	1	2092	2.71538	1.106	19	23	1	2078	1.85152	1.073	22
TBB4B_RAT	49769	27	2.20681	1.14196	1.3589	4.33333	Tubulin beta-4B chain OS=Rattus norvegicus GN=Tubb4b PE=1 SV=1	14	3	2336	1.64772	1.133	5	15	2	2098	2.14753	1.16	3	12	2	2852	3.03719	1.222	5
TBB2B_RAT	49921	28	2.19513	1.13431	1.31172	6.66667	Tubulin beta-2B chain OS=Rattus norvegicus GN=Tubb2b PE=1 SV=1	14	1	2600	1.65569	1.117	8	15	1	2348	2.24578	1.275	6	12	1	3295	2.84468	1.19	6
ACTG_RAT	41766	29	2.16033	1.11125	1.21924	14.6667	Actin, cytoplasmic 2 OS=Rattus norvegicus GN=Actg1 PE=1 SV=1	46	1	1287	2.59276	1.086	10	32	1	1451	2.2227	1.081	18	40	1	1556	1.74951	1.139	16
ACTC_RAT	41992	30	2.13419	1.09369	1.3244	9.66667	Actin, alpha cardiac muscle 1 OS=Rattus norvegicus GN=Actc1 PE=2 SV=1	46	2	793	2.73249	1.133	8	32	3	841	2.26267	1.071	11	40	3	1053	1.57223	1.173	10
BDH_RAT	38177	31	2.1219	1.08536	1.12866	3.66667	D-beta-hydroxybutyrate dehydrogenase, mitochondrial OS=Rattus norvegicus GN=Bdh1 PE=1 SV=2	209		340	1.86002	1.236	4	175		368	2.35987	1.238	4	307		242	2.17655	1.204	3
GBB1_RAT	37353	32	2.09921	1.06985	1.59689	6.66667	Guanine nucleotide-binding protein G(I)/G(S)/G(T) subunit beta-1 OS=Rattus norvegicus GN=Gnb1 PE=1 SV=4	203	1	357	2.22056	1.087	5	163	1	423	3.25106	1.225	5	159	1	506	1.28138	1.053	10
DCLK1_RAT	47651	33	2.09716	1.06843	1.14069	15.6667	Serine/threonine-protein kinase DCLK1 OS=Rattus norvegicus GN=Dclk1 PE=1 SV=1	24	2	1441	1.92003	1.059	13	16	2	1296	2.43973	1.196	16	23	2	1776	1.969	1.145	18
UCRI_RAT	29427	34	2.086	1.06074	1.18515	2.33333	Cytochrome b-c1 complex subunit Rieske, mitochondrial OS=Rattus norvegicus GN=Uqcrfs1 PE=1 SV=2	251		283	1.71587	1.316	3	337		183	2.33598	1.747	2	232		349	2.26459	1.866	2
LONP2_RAT	94334	35	2.08195	1.05794	1.01677	4	Lon protease homolog 2, peroxisomal OS=Rattus norvegicus GN=Lonp2 PE=1 SV=2	159		454	2.07055	1.235	4	180		360	2.12121	1.352	4	175		463	2.05467	1.24	4
PFKAM_RAT	85506	36	2.07491	1.05305	1.13612	18.3333	ATP-dependent 6-phosphofructokinase, muscle type OS=Rattus norvegicus GN=Pfkm PE=1 SV=3	26	2	1107	2.0132	1.037	19	26	2	1245	2.38672	1.052	19	26	2	1120	1.85912	1.073	17
LYSM1_RAT	24863	37	2.04319	1.03082	1.69312	4.66667	LysM and putative peptidoglycan-binding domain-containing protein 1 OS=Rattus norvegicus GN=Lysmd1 PE=1 SV=1	267		261	1.2361	1.122	4	198		330	1.95302	1.595	4	278		282	3.53318	1.309	6
TBB5_RAT	49639	38	1.98815	0.991429	1.27825	4.33333	Tubulin beta-5 chain OS=Rattus norvegicus GN=Tubb5 PE=1 SV=1	14	4	1892	1.59029	1.137	5	15	3	1790	1.91096	1.345	3	12	3	2397	2.58595	1.188	5
SAHH2_RAT	53719	39	1.97295	0.980352	1.36549	2.33333	Adenosylhomocysteinase 2 OS=Rattus norvegicus GN=Ahcyl1 PE=1 SV=2	410		137	2.35624	1.23	2	444		112	2.36713	1.057	3	440		148	1.3769	1.146	2
GBB2_RAT	37307	40	1.9689	0.977387	1.46316	5.33333	Guanine nucleotide-binding protein G(I)/G(S)/G(T) subunit beta-2 OS=Rattus norvegicus GN=Gnb2 PE=1 SV=4	203	2	167	2.15361	1.084	4	163	2	315	2.73253	1.26	4	159	2	281	1.29699	1.139	8
TBB3_RAT	50386	41	1.93818	0.954701	1.45667	3.66667	Tubulin beta-3 chain OS=Rattus norvegicus GN=Tubb3 PE=1 SV=1	14	5	1868	1.47652	1.138	5	15	4	1662	1.65626	1.447	3	12	4	2265	2.97724	1.261	3
GNAI1_RAT	40319	42	1.89974	0.925806	1.07009	3	Guanine nucleotide-binding protein G(i) subunit alpha-1 OS=Rattus norvegicus GN=Gnai1 PE=1 SV=3	117	2	296	1.78175	1.136	2	64	3	324	1.887	1.025	2	93	2	536	2.03924	1.341	5
CDK5_RAT	33233	43	1.89342	0.920994	1.05288	5.66667	Cyclin-dependent-like kinase 5 OS=Rattus norvegicus GN=Cdk5 PE=1 SV=1	332		195	1.93541	1.135	5	242		279	1.96466	1.141	7	231		350	1.78517	1.163	5
DPYL2_RAT	62239	44	1.86769	0.901254	1.35006	14.6667	Dihydropyrimidinase-related protein 2 OS=Rattus norvegicus GN=Dpysl2 PE=1 SV=1	30	1	1649	2.29054	1.278	17	22	1	1740	2.14953	1.17	12	35	1	1651	1.32322	1.194	15
HCD2_RAT	27229	45	1.84815	0.886082	1.13789	6.66667	3-hydroxyacyl-CoA dehydrogenase type-2 OS=Rattus norvegicus GN=Hsd17b10 PE=1 SV=3	134		550	1.67391	1.093	5	114		577	2.13891	1.077	7	111		670	1.76315	1.129	8
NDRG2_RAT	40753	46	1.80759	0.854069	1.11433	2.66667	Protein NDRG2 OS=Rattus norvegicus GN=Ndrg2 PE=1 SV=1	342		186	1.59927	1.19	3	311		204	1.88033	1.041	2	282		277	1.96401	1.203	3
PFKAL_RAT	85284	47	1.80699	0.85359	1.17219	9	ATP-dependent 6-phosphofructokinase, liver type OS=Rattus norvegicus GN=Pfkl PE=1 SV=3	26	3	822	1.7521	1.084	9	26	3	868	2.1462	1.169	9	26	3	763	1.56905	1.107	9
SDHA_RAT	71570	48	1.79571	0.844556	1.08401	10	Succinate dehydrogenase [ubiquinone] flavoprotein subunit, mitochondrial OS=Rattus norvegicus GN=Sdha PE=1 SV=1	148		493	1.67152	1.102	11	138		497	1.95965	1.098	8	149		523	1.76774	1.068	11
SRCN1_RAT	129665	49	1.76094	0.81635	1.10377	43.6667	SRC kinase signaling inhibitor 1 OS=Rattus norvegicus GN=Srcin1 PE=1 SV=1	8		4872	1.78718	1.04	46	10		3803	1.58496	1.069	38	5		5420	1.92776	1.07	47
AT2A2_RAT	114694	50	1.72177	0.783893	1.86966	5.33333	Sarcoplasmic/endoplasmic reticulum calcium ATPase 2 OS=Rattus norvegicus GN=Atp2a2 PE=1 SV=1	90		746	3.46284	1.121	4	105		632	1.03522	1.462	4	89		798	1.42383	1.238	8
EAA2_RAT	62066	51	1.71049	0.774406	1.16754	6.33333	Excitatory amino acid transporter 2 OS=Rattus norvegicus GN=Slc1a2 PE=1 SV=2	61		1040	1.83223	1.138	8	73		816	1.90675	1.194	6	48		1341	1.43247	1.229	5
GNAI2_RAT	40473	52	1.70613	0.77073	1.21079	2.66667	Guanine nucleotide-binding protein G(i) subunit alpha-2 OS=Rattus norvegicus GN=Gnai2 PE=1 SV=3	117	4	259	1.39407	1.06	2	64	2	356	1.74697	1.113	2	93	3	367	2.03924	1.419	4
NECA1_RAT	40878	53	1.67761	0.746408	1.34345	2.66667	N-terminal EF-hand calcium-binding protein 1 OS=Rattus norvegicus GN=Necab1 PE=1 SV=1	343		184	2.04988	1.128	3	239		285	1.19522	1.253	3	343		206	1.92707	1.216	2
SV2A_RAT	82608	54	1.64051	0.71414	1.06178	5.66667	Synaptic vesicle glycoprotein 2A OS=Rattus norvegicus GN=Sv2a PE=1 SV=2	144		509	1.75472	1.081	6	111		607	1.56418	1.185	7	143		566	1.60856	1.316	4
IDH3B_RAT	42327	55	1.61381	0.690469	1.21781	14.6667	Isocitrate dehydrogenase [NAD] subunit beta, mitochondrial OS=Rattus norvegicus GN=Idh3B PE=2 SV=1	69		992	1.35141	1.073	14	56		987	1.5589	1.126	15	68		1053	1.99504	1.171	15
GBB5_RAT	38707	56	1.60237	0.680203	1.22952	2.66667	Guanine nucleotide-binding protein subunit beta-5 OS=Rattus norvegicus GN=Gnb5 PE=2 SV=1	463		112	1.29413	1.07	2	217		309	1.62629	1.1983	4	222		372	1.95482	1.2938	2
EF1A2_RAT	50422	57	1.59166	0.67053	1.18959	2.66667	Elongation factor 1-alpha 2 OS=Rattus norvegicus GN=Eef1a2 PE=1 SV=1	136	1	548	1.32205	1.112	3	122	1	550	1.63552	1.099	3	118	1	632	1.86487	1.347	2
STAU2_RAT	62642	58	1.58527	0.664731	1.3258	3.66667	Double-stranded RNA-binding protein Staufen homolog 2 OS=Rattus norvegicus GN=Stau2 PE=1 SV=1	171		424	1.83755	1.038	3	179		362	1.89319	1.282	3	186		441	1.14519	1.105	5
CEND_RAT	15034	59	1.5756	0.655899	1.08951	2	Cell cycle exit and neuronal differentiation protein 1 OS=Rattus norvegicus GN=Cend1 PE=1 SV=1	645		55	1.61945	1.183	2	498		92	1.43124	1.069	2	409		161	1.68754	1.079	2
TBA1A_RAT	50104	60	1.559	0.640618	1.16005	5.66667	Tubulin alpha-1A chain OS=Rattus norvegicus GN=Tuba1a PE=1 SV=1	19	1	2099	1.31401	1.184	6	13	1	2382	1.67957	1.159	5	20	1	2281	1.71688	1.271	6
ACSL6_RAT	78130	61	1.55865	0.640294	1.04191	6.33333	Long-chain-fatty-acid--CoA ligase 6 OS=Rattus norvegicus GN=Acsl6 PE=1 SV=1	149		492	1.5063	1.035	7	227		299	1.63128	1.149	7	169	1	471	1.541	1.071	5
MK01_RAT	41249	62	1.55322	0.635266	1.07295	7.33333	Mitogen-activated protein kinase 1 OS=Rattus norvegicus GN=Mapk1 PE=1 SV=3	177		416	1.48452	1.145	7	141	1	487	1.68447	1.047	7	177		456	1.49848	1.093	8
GLNA_RAT	42240	63	1.54136	0.624208	1.31433	8	Glutamine synthetase OS=Rattus norvegicus GN=Glul PE=1 SV=3	150		491	1.73288	1.104	7	71		829	1.87371	1.073	9	117		641	1.12783	1.148	8
EF2_RAT	95223	64	1.53839	0.621424	1.8974	5	Elongation factor 2 OS=Rattus norvegicus GN=Eef2 PE=1 SV=4	202		361	1.19214	1.097	5	136		499	3.18816	1.936	3	113		664	0.957928	1.107	7
INP5E_RAT	72193	65	1.53758	0.620662	1.18698	2.66667	72 kDa inositol polyphosphate 5-phosphatase OS=Rattus norvegicus GN=Inpp5e PE=1 SV=2	127		572	1.82855	1.209	3	183		356	1.53164	1.248	3	208		394	1.29792	1.279	2
GNAO_RAT	40043	66	1.53075	0.614239	1.04589	8.66667	Guanine nucleotide-binding protein G(o) subunit alpha OS=Rattus norvegicus GN=Gnao1 PE=1 SV=2	117	1	612	1.4543	1.097	8	64	1	896	1.58097	1.041	9	93	1	774	1.56004	1.09	9
PFKAP_RAT	85665	67	1.53038	0.613887	1.16345	23	ATP-dependent 6-phosphofructokinase, platelet type OS=Rattus norvegicus GN=Pfkp PE=1 SV=2	26	1	1776	1.5293	1.065	21	26	1	1562	1.78114	1.058	24	26	1	1888	1.31585	1.045	24
ARFG3_RAT	57635	68	1.52339	0.607289	1.32321	2	ADP-ribosylation factor GTPase-activating protein 3 OS=Rattus norvegicus GN=Arfgap3 PE=1 SV=1	450		118	1.19998	1.027	2	293		224	2.07355	1.055	2	321		228	1.42085	1.084	2
MAST1_RAT	170923	69	1.50672	0.591414	1.20376	6.66667	Microtubule-associated serine/threonine-protein kinase 1 OS=Rattus norvegicus GN=Mast1 PE=1 SV=1	104	1	680	1.38234	1.075	7	110		609	1.86413	1.299	5	128	1	609	1.32742	1.055	8
SNP25_RAT	23300	70	1.49191	0.577164	1.00491	4.66667	Synaptosomal-associated protein 25 OS=Rattus norvegicus GN=Snap25 PE=1 SV=1	232		308	1.48533	1.164	4	155		448	1.49978	1.121	6	261		294	1.49067	1.201	4
MINK1_RAT	150289	71	1.45953	0.545507	1.01521	14	Misshapen-like kinase 1 OS=Rattus norvegicus GN=Mink1 PE=1 SV=2	64		1021	1.48185	1.106	11	78		798	1.45931	1.095	16	61		1115	1.43778	1.095	15
MBP_RAT	21489	72	1.4551	0.541122	1.10383	12	Myelin basic protein OS=Rattus norvegicus GN=Mbp PE=1 SV=3	17		2411	1.29843	1.416	12	14		2379	1.54809	1.329	12	19		2369	1.53274	1.432	12
TAU_RAT	78516	73	1.45007	0.536124	1.08007	3.33333	Microtubule-associated protein tau OS=Rattus norvegicus GN=Mapt PE=1 SV=3	278		248	1.35163	1.273	3	301		218	1.43273	1.13	4	254		303	1.57451	1.068	3
SEPT5_RAT	42825	74	1.44333	0.529402	1.21542	3.66667	Septin-5 OS=Rattus norvegicus GN=Sept5 PE=1 SV=2	415		135	1.60083	1.192	4	286		231	1.62974	1.042	5	380		179	1.15248	1.142	2
BCAS1_RAT	58588	75	1.40635	0.491952	1.03814	4.66667	Breast carcinoma-amplified sequence 1 homolog (Fragment) OS=Rattus norvegicus GN=Bcas1 PE=1 SV=2	206		342	1.4375	1.086	3	182		357	1.34686	1.122	4	277		283	1.43664	1.118	7
S12A5_RAT	126165	76	1.40182	0.487306	1.20638	10.3333	Solute carrier family 12 member 5 OS=Rattus norvegicus GN=Slc12a5 PE=1 SV=2	65		1018	1.73252	1.053	11	77		803	1.21217	1.042	10	72		959	1.31171	1.03	10
GRPE1_RAT	24282	77	1.38125	0.46597	1.11742	10.6667	GrpE protein homolog 1, mitochondrial OS=Rattus norvegicus GN=Grpel1 PE=1 SV=2	197		368	1.21507	1.086	10	120		551	1.47047	1.101	11	96		758	1.47488	1.061	11
ECHA_RAT	82613	78	1.37688	0.461405	1.1073	13.6667	Trifunctional enzyme subunit alpha, mitochondrial OS=Rattus norvegicus GN=Hadha PE=1 SV=2	83		810	1.31338	1.056	13	54		1000	1.54774	1.055	12	52		1266	1.28411	1.029	16
MYPR_RAT	30057	79	1.36375	0.447579	1.0138	2.66667	Myelin proteolipid protein OS=Rattus norvegicus GN=Plp1 PE=1 SV=2	308		213	1.34257	1.102	3	300		219	1.37168	1.068	3	324		226	1.37725	1.254	2
DLGP2_RAT	118903	80	1.35847	0.441986	1.22507	4.33333	Disks large-associated protein 2 OS=Rattus norvegicus GN=Dlgap2 PE=1 SV=3	96	1	714	1.36172	1.101	7	168	2	355	1.66222	1.405	3	125	1	615	1.10759	1.208	3
PRPS1_RAT	34812	81	1.34534	0.427975	1.17748	3	Ribose-phosphate pyrophosphokinase 1 OS=Rattus norvegicus GN=Prps1 PE=1 SV=2	243		294	1.35119	1.092	5	196		333	1.58061	1.102	2	306		246	1.14014	1.171	2
WASF1_RAT	61477	82	1.33392	0.415675	1.13332	3	Wiskott-Aldrich syndrome protein family member 1 OS=Rattus norvegicus GN=Wasf1 PE=1 SV=1	154		477	1.43323	1.273	3	162		423	1.43451	1.282	3	184		443	1.15444	1.421	3
SEPT3_RAT	40572	83	1.32878	0.410103	1.0481	3.33333	Neuronal-specific septin-3 OS=Rattus norvegicus GN=Sept3 PE=1 SV=2	353		174	1.26757	1.057	4	462		103	1.32927	1.106	3	325		226	1.39243	1.031	3
RL11_RAT	20240	84	1.32185	0.402555	1.13051	3	60S ribosomal protein L11 OS=Rattus norvegicus GN=Rpl11 PE=1 SV=2	406		141	1.22085	1.247	2	12	2	277	1.24264	1.108	4	179		447	1.52243	1.03	3
TRIM9_RAT	79155	85	1.32003	0.400566	1.22029	3.66667	E3 ubiquitin-protein ligase TRIM9 OS=Rattus norvegicus GN=Trim9 PE=1 SV=1	138		537	1.42207	1.267	4	129		525	1.53538	1.312	4	141		569	1.05344	1.135	3
AT2B2_RAT	136724	86	1.28722	0.364258	1.10274	13.3333	Plasma membrane calcium-transporting ATPase 2 OS=Rattus norvegicus GN=Atp2b2 PE=1 SV=2	50	2	1095	1.40312	1.1	12	53	2	973	1.15744	1.046	12	49	2	1269	1.3133	1.098	16
PHB2_RAT	33292	87	1.27777	0.35363	1.24641	3.33333	Prohibitin-2 OS=Rattus norvegicus GN=Phb2 PE=1 SV=1	326		200	1.52759	1.082	4	292		224	1.36707	1.087	4	226		358	0.998987	1.042	2
RP3A_RAT	75785	88	1.2768	0.352532	1.14668	19.3333	Rabphilin-3A OS=Rattus norvegicus GN=Rph3a PE=1 SV=1	49		1254	1.31611	1.065	17	37		1345	1.43838	1.074	21	57		1189	1.09951	1.098	20
SYYC_RAT	59078	89	1.26848	0.343097	1.1386	6.66667	Tyrosine--tRNA ligase, cytoplasmic OS=Rattus norvegicus GN=Yars PE=2 SV=3	106		667	1.33104	1.046	8	139		492	1.40026	1.081	6	172		465	1.09508	1.081	6
DPYL1_RAT	62157	90	1.26811	0.342681	1.39871	9	Dihydropyrimidinase-related protein 1 OS=Rattus norvegicus GN=Crmp1 PE=1 SV=1	30	2	1285	1.59896	1.396	10	22	2	957	1.47769	1.27	8	35	2	912	0.863079	1.201	9
CPT1A_RAT	88069	91	1.26489	0.339015	1.23349	3.66667	Carnitine O-palmitoyltransferase 1, liver isoform OS=Rattus norvegicus GN=Cpt1a PE=1 SV=2	193		390	1.10819	1.033	2	143	1	473	1.61115	1.282	6	157		510	1.13348	1.096	3
MAP4_RAT	110233	92	1.25378	0.326282	1.0269	11	Microtubule-associated protein 4 OS=Rattus norvegicus GN=Map4 PE=1 SV=1	32		1566	1.26057	1.094	11	42		1235	1.21815	1.087	11	36		1644	1.2835	1.105	11
SYN1_RAT	73943	93	1.23115	0.300005	1.91996	3.66667	Synapsin-1 OS=Rattus norvegicus GN=Syn1 PE=1 SV=3	183	2	382	0.606637	1.841	2	102	1	653	1.4031	1.384	4	108	1	686	2.19237	1.095	5
NUMBL_RAT	65472	94	1.22346	0.290963	1.12376	4	Numb-like protein OS=Rattus norvegicus GN=Numbl PE=1 SV=1	161	1	442	1.32803	1.113	5	169	1	390	1.2882	1.114	3	191	1	438	1.07047	1.059	4
PGAM5_RAT	32041	95	1.22104	0.288113	1.17477	5	Serine/threonine-protein phosphatase PGAM5, mitochondrial OS=Rattus norvegicus GN=Pgam5 PE=2 SV=1	349		181	1.08779	1.085	4	343		173	1.14028	1.122	3	262		294	1.4677	1.099	8
GTPB1_RAT	72443	96	1.20649	0.27081	1.29444	2.66667	GTP-binding protein 1 OS=Rattus norvegicus GN=Gtpbp1 PE=1 SV=1	225		314	1.38444	1.201	3	212		312	1.41602	1.168	2	148		535	0.895826	1.656	3
GPM6A_RAT	31174	97	1.19848	0.261207	1.08746	2	Neuronal membrane glycoprotein M6-a OS=Rattus norvegicus GN=Gpm6a PE=1 SV=1	421		132	1.10357	1.122	2	338		182	1.30496	1.157	2	479		124	1.19535	1.106	2
PURA_RAT	15313	98	1.18575	0.245803	1.08643	7	Transcriptional activator protein Pur-alpha (Fragments) OS=Rattus norvegicus GN=Pura PE=1 SV=1	145		508	1.27209	1.096	6	89		714	1.08216	1.134	6	104		698	1.21108	1.407	9
RL21_RAT	18454	99	1.17452	0.232076	1.13165	3	60S ribosomal protein L21 OS=Rattus norvegicus GN=Rpl21 PE=1 SV=3	254		280	1.18663	1.092	2	258		259	1.03291	1.031	3	378		180	1.32193	1.092	4
DDX1_RAT	82445	100	1.16205	0.216666	1.26133	19.6667	ATP-dependent RNA helicase DDX1 OS=Rattus norvegicus GN=Ddx1 PE=1 SV=1	34		1547	0.889717	1.055	20	43		1228	1.30103	1.059	20	33		1712	1.35559	1.043	19
ROGDI_RAT	32185	101	1.1539	0.206518	1.1276	3.66667	Protein rogdi homolog OS=Rattus norvegicus GN=Rogdi PE=2 SV=1	261		275	1.31992	1.097	5	240		280	1.11117	1.019	3	250		305	1.04755	1.085	3
NSF_RAT	82600	102	1.14835	0.199559	1.14233	29.6667	Vesicle-fusing ATPase OS=Rattus norvegicus GN=Nsf PE=1 SV=1	33		1562	1.11163	1.04	27	31		1464	1.32927	1.048	34	46		1389	1.02481	1.053	28
RS3_RAT	26657	103	1.14168	0.191162	2.23192	20	40S ribosomal protein S3 OS=Rattus norvegicus GN=Rps3 PE=1 SV=1	31		1580	0.70144	1.116	18	28		1490	0.735625	1.101	19	21		2184	2.88396	1.832	23
1433G_RAT	28285	104	1.13843	0.187047	1.15353	7.33333	14-3-3 protein gamma OS=Rattus norvegicus GN=Ywhag PE=1 SV=2	95	4	332	0.989503	1.104	5	86	4	403	1.13263	1.243	9	120	3	479	1.31648	1.606	8
VDAC3_RAT	30778	105	1.13733	0.185647	1.17609	4	Voltage-dependent anion-selective channel protein 3 OS=Rattus norvegicus GN=Vdac3 PE=1 SV=2	182	2	338	1.3332	1.145	5	213	2	289	1.14462	1.305	3	126	2	328	0.96405	1.193	4
GIT1_RAT	85178	106	1.13485	0.182508	1.03433	4.33333	ARF GTPase-activating protein GIT1 OS=Rattus norvegicus GN=Git1 PE=1 SV=1	305		217	1.15493	1.045	5	216		310	1.09155	1.069	6	349		198	1.15937	1.143	2
ATAT_RAT	47298	107	1.1292	0.175296	1.08447	12.6667	Alpha-tubulin N-acetyltransferase 1 OS=Rattus norvegicus GN=Atat1 PE=1 SV=1	142		522	1.1405	1.06	14	112		594	1.21793	1.065	12	88		804	1.03655	1.081	12
DGKB_RAT	90229	108	1.12095	0.164727	1.14658	2.66667	Diacylglycerol kinase beta OS=Rattus norvegicus GN=Dgkb PE=1 SV=1	204		353	1.28663	1.024	3	194		338	0.978719	1.173	3	253	1	303	1.11854	1.012	2
ACON_RAT	85380	109	1.11309	0.154573	1.2019	18.3333	Aconitate hydratase, mitochondrial OS=Rattus norvegicus GN=Aco2 PE=1 SV=2	44		1310	0.915602	1.071	19	55		990	1.31913	1.241	18	44		1417	1.14182	1.039	18
APC_RAT	310342	110	1.09818	0.135121	1.12057	8.33333	Adenomatous polyposis coli protein OS=Rattus norvegicus GN=Apc PE=1 SV=1	43		1326	1.11541	1.129	9	62		898	1.22008	1.089	9	47		1355	0.973207	1.095	7
MTAP2_RAT	202288	111	1.09736	0.134033	1.12056	38.6667	Microtubule-associated protein 2 OS=Rattus norvegicus GN=Map2 PE=1 SV=3	6		5341	1.14224	1.049	39	5		5491	1.19874	1.044	38	6	1	5324	0.965078	1.05	39
ODP2_RAT	67123	112	1.08581	0.118765	1.13569	2	Dihydrolipoyllysine-residue acetyltransferase component of pyruvate dehydrogenase complex, mitochondrial OS=Rattus norvegicus GN=Dlat PE=1 SV=3	319		206	1.02443	1.223	2	274		237	1.2564	1.183	2	257		300	0.994596	1.242	2
AT1A1_RAT	112982	113	1.08395	0.116301	1.08015	21.3333	Sodium/potassium-transporting ATPase subunit alpha-1 OS=Rattus norvegicus GN=Atp1a1 PE=1 SV=1	10	3	3265	1.14161	1.078	20	11	3	2890	0.992045	1.086	22	10	3	3145	1.12456	1.095	22
AT1A3_RAT	111620	114	1.08313	0.11521	1.06417	28	Sodium/potassium-transporting ATPase subunit alpha-3 OS=Rattus norvegicus GN=Atp1a3 PE=1 SV=2	10	1	3839	1.14831	1.064	31	11	1	3412	1.01459	1.061	27	10	1	3871	1.09068	1.077	26
AT1A2_RAT	112145	115	1.07118	0.0991999	1.07352	25.3333	Sodium/potassium-transporting ATPase subunit alpha-2 OS=Rattus norvegicus GN=Atp1a2 PE=1 SV=1	10	2	3397	1.14272	1.07	28	11	2	3055	0.992899	1.07	24	10	2	3402	1.08328	1.096	24
RL24_RAT	17768	116	1.06778	0.0946128	1.02425	3	60S ribosomal protein L24 OS=Rattus norvegicus GN=Rpl24 PE=2 SV=1	205		346	1.07992	1.089	3	130		525	1.0388	1.112	4	167		480	1.08523	1.039	2
MAP6_RAT	100423	117	1.0617	0.0863761	1.08075	42	Microtubule-associated protein 6 OS=Rattus norvegicus GN=Map6 PE=1 SV=1	7		4975	1.13045	1.044	39	8		4252	1.0876	1.048	43	9		4308	0.973381	1.048	44
MARK2_RAT	80821	118	1.06148	0.0860828	1.07791	19.3333	Serine/threonine-protein kinase MARK2 OS=Rattus norvegicus GN=Mark2 PE=1 SV=1	20	1	1915	1.03436	1.091	17	24	1	1668	1.15512	1.135	18	32	1	1783	1.00101	1.372	23
HNRPM_RAT	73733	119	1.0604	0.0846044	1.13789	11	Heterogeneous nuclear ribonucleoprotein M OS=Rattus norvegicus GN=Hnrnpm PE=1 SV=4	51		1203	1.03189	1.096	12	45		1209	1.22051	1.069	8	43		1440	0.946739	1.047	13
RS7_RAT	22113	120	1.05677	0.079657	1.209	6.66667	40S ribosomal protein S7 OS=Rattus norvegicus GN=Rps7 PE=1 SV=1	383		156	0.904113	1.236	5	265		254	0.999928	1.19	6	187		441	1.30541	1.089	9
AT2B1_RAT	138632	121	1.04326	0.0611001	1.07298	14.3333	Plasma membrane calcium-transporting ATPase 1 OS=Rattus norvegicus GN=Atp2b1 PE=1 SV=2	50	1	1248	1.07371	1.083	15	53	1	1004	0.96279	1.08	14	49	1	1305	1.0984	1.091	14
TRIO_RAT	347642	122	1.04143	0.0585661	1.12467	3.66667	Triple functional domain protein OS=Rattus norvegicus GN=Trio PE=1 SV=4	195		382	1.06205	1.149	5	230		293	1.15841	1.156	3	248		316	0.918089	1.274	3
PPR1B_RAT	22899	123	1.03909	0.0553244	1.50981	2.33333	Protein phosphatase 1 regulatory subunit 1B OS=Rattus norvegicus GN=Ppp1r1b PE=1 SV=1	379		159	1.45198	1.387	2	575		64	1.17813	1.052	2	400		165	0.655857	1.064	3
GRP75_RAT	73812	124	1.03855	0.0545683	1.1338	17.6667	Stress-70 protein, mitochondrial OS=Rattus norvegicus GN=Hspa9 PE=1 SV=3	71		947	1.12952	1.052	17	58		968	1.1032	1.062	16	75		934	0.89894	1.031	20
AT2B3_RAT	138471	125	1.0385	0.0544984	1.30541	9	Plasma membrane calcium-transporting ATPase 3 OS=Rattus norvegicus GN=Atp2b3 PE=1 SV=2	50	3	752	1.19701	1.1	8	53	3	594	0.763625	1.205	8	49	3	998	1.22529	1.067	11
WDR7_RAT	163086	126	1.03645	0.0516522	1.12389	15	WD repeat-containing protein 7 OS=Rattus norvegicus GN=Wdr7 PE=1 SV=1	56		1082	1.11769	1.045	14	68		857	1.09952	1.074	15	64		1089	0.905988	1.041	16
ALDOA_RAT	39327	127	1.03558	0.0504393	1.24158	3	Fructose-bisphosphate aldolase A OS=Rattus norvegicus GN=Aldoa PE=1 SV=2	231		308	1.21006	1.142	3	166	1	405	0.80887	1.196	3	233	1	349	1.13466	1.012	3
KIF5A_RAT	116843	128	1.03325	0.0471862	1.22085	2.33333	Kinesin heavy chain isoform 5A OS=Rattus norvegicus GN=Kif5a PE=1 SV=1	366	3	67	0.907008	1.24	2	403	1	130	0.935464	1.059	3	290	1	265	1.30009	1.301	2
CSKI1_RAT	150255	129	1.02816	0.0400672	1.09947	7	Caskin-1 OS=Rattus norvegicus GN=Caskin1 PE=1 SV=1	111		639	1.14687	1.075	4	144		473	0.97955	1.126	6	127		611	0.967485	1.03	11
LANC1_RAT	45210	130	1.02188	0.0312208	1.15652	16	LanC-like protein 1 OS=Rattus norvegicus GN=Lancl1 PE=1 SV=2	27		1744	1.19162	1.161	13	19		1926	1.00341	1.08	17	15		2625	0.89244	1.263	18
1433F_RAT	28194	131	1.02009	0.028691	1.26919	5.66667	14-3-3 protein eta OS=Rattus norvegicus GN=Ywhah PE=1 SV=2	95	6	227	0.974708	1.115	5	86	6	343	1.32014	1.176	6	120	5	296	0.824927	1.558	6
LETM1_RAT	83008	132	1.01498	0.0214448	1.20407	2.66667	LETM1 and EF-hand domain-containing protein 1, mitochondrial OS=Rattus norvegicus GN=Letm1 PE=1 SV=1	274		254	1.13076	1.483	3	340		180	1.12893	1.185	2	297		257	0.819079	1.058	3
RS5_RAT	22864	133	1.01326	0.0189998	1.1114	4	40S ribosomal protein S5 OS=Rattus norvegicus GN=Rps5 PE=1 SV=3	577		70	0.995982	1.099	5	267		250	0.920535	1.035	4	495		114	1.13466	1.103	3
VDAC2_RAT	31726	134	1.00877	0.0126028	1.15712	6.66667	Voltage-dependent anion-selective channel protein 2 OS=Rattus norvegicus GN=Vdac2 PE=1 SV=2	182	1	406	1.00402	1.19	7	213	1	311	1.16996	1.178	7	126	1	613	0.873913	1.236	6
DNM1L_RAT	83856	135	1.00833	0.0119714	1.10695	3	Dynamin-1-like protein OS=Rattus norvegicus GN=Dnm1l PE=1 SV=1	165		434	1.08735	1.173	4	145		473	0.898313	1.337	3	245		323	1.04957	1.168	2
SYGP1_RAT	144631	136	1.00706	0.0101559	1.13141	4.33333	Ras/Rap GTPase-activating protein SynGAP OS=Rattus norvegicus GN=Syngap1 PE=1 SV=2	146	1	507	1.00414	1.2	5	221	1	302	1.14103	1.29	3	155	1	513	0.891414	1.172	5
VDAC1_RAT	30737	137	1.00319	0.00459373	1.07366	3.66667	Voltage-dependent anion-selective channel protein 1 OS=Rattus norvegicus GN=Vdac1 PE=1 SV=4	339		190	1.06924	1.114	4	204		319	0.929185	1.069	4	255		302	1.01619	1.13	3
LRRC7_RAT	166774	138	0.997058	-0.00425087	1.14127	6.33333	Leucine-rich repeat-containing protein 7 OS=Rattus norvegicus GN=Lrrc7 PE=1 SV=2	100		707	1.15982	1.119	6	118		555	0.940933	1.104	5	95		766	0.908261	1.101	8
HNRPQ_RAT	59674	139	0.995159	-0.00700061	1.11332	4.33333	Heterogeneous nuclear ribonucleoprotein Q OS=Rattus norvegicus GN=Syncrip PE=2 SV=1	217		326	0.992492	1.11	4	193		340	1.10939	1.15	5	247		321	0.895087	1.168	4
OPA1_RAT	111238	140	0.991431	-0.0124162	1.11841	19	Dynamin-like 120 kDa protein, mitochondrial OS=Rattus norvegicus GN=Opa1 PE=1 SV=1	98		710	1.03645	1.059	17	65		888	1.07711	1.056	17	59		1127	0.87293	1.032	23
ODO1_RAT	116221	141	0.989118	-0.0157852	1.07131	6.66667	2-oxoglutarate dehydrogenase, mitochondrial OS=Rattus norvegicus GN=Ogdh PE=1 SV=1	151		491	1.07091	1.1	7	232		292	0.953637	1.031	8	280		281	0.947565	1.079	5
DYN1_RAT	97234	142	0.987787	-0.0177276	1.19123	11.3333	Dynamin-1 OS=Rattus norvegicus GN=Dnm1 PE=1 SV=2	91	1	746	1.20845	1.397	9	116	1	571	0.882957	1.077	9	94	1	770	0.903276	1.045	16
MARE3_RAT	31946	143	0.987617	-0.0179759	1.27337	3.66667	Microtubule-associated protein RP/EB family member 3 OS=Rattus norvegicus GN=Mapre3 PE=1 SV=1	325	1	200	1.06993	1.033	5	282	1	233	1.19604	1.189	4	327	1	222	0.752772	1.106	2
S61A1_RAT	52231	144	0.986016	-0.0203177	1.15486	3.66667	Protein transport protein Sec61 subunit alpha isoform 1 OS=Rattus norvegicus GN=Sec61a1 PE=2 SV=2	340		188	0.990338	1.158	4	253		263	1.13616	1.362	4	505		112	0.851976	1.32	3
1433E_RAT	29155	145	0.985445	-0.0211521	1.08772	4.66667	14-3-3 protein epsilon OS=Rattus norvegicus GN=Ywhae PE=1 SV=1	95	3	409	0.896808	1.117	5	86	3	440	1.01236	1.298	4	120	4	460	1.05406	1.486	5
CBR1_RAT	30559	146	0.981405	-0.0270795	1.35909	9.33333	Carbonyl reductase [NADPH] 1 OS=Rattus norvegicus GN=Cbr1 PE=1 SV=2	139		535	0.777092	1.066	10	104		635	0.875585	1.051	8	130		599	1.38923	1.183	10
SYNPO_RAT	99924	147	0.974658	-0.0370315	1.09425	9	Synaptopodin OS=Rattus norvegicus GN=Synpo PE=1 SV=2	157		465	1.01858	1.111	11	172		380	1.03445	1.13	7	190		439	0.878721	1.122	9
MARK3_RAT	88696	148	0.969079	-0.0453142	1.26424	17.6667	MAP/microtubule affinity-regulating kinase 3 OS=Rattus norvegicus GN=Mark3 PE=1 SV=1	20	2	979	0.836954	1.094	17	24	2	870	0.856197	1.07	17	32	2	990	1.26999	1.393	19
DGKZ_RAT	103943	149	0.95616	-0.0646761	1.12748	3.33333	Diacylglycerol kinase zeta OS=Rattus norvegicus GN=Dgkz PE=1 SV=1	244		292	1.09738	1.178	3	321		193	0.881158	1.045	3	319		232	0.904028	1.139	4
EPS8_RAT	91871	150	0.951678	-0.0714541	1.14241	4	Epidermal growth factor receptor kinase substrate 8 OS=Rattus norvegicus GN=Eps8 PE=1 SV=2	79		847	1.0691	1.058	3	113		579	0.97955	1.188	4	115		656	0.823052	1.123	5
AP2A2_RAT	103979	151	0.944857	-0.0818328	1.44207	9	AP-2 complex subunit alpha-2 OS=Rattus norvegicus GN=Ap2a2 PE=1 SV=3	77		883	1.35052	1.32	12	99		657	0.961186	1.124	9	102		725	0.649814	1.242	6
ACLY_RAT	120559	152	0.941898	-0.0863578	1.26494	3.33333	ATP-citrate synthase OS=Rattus norvegicus GN=Acly PE=1 SV=1	253		282	0.781529	1.294	2	251		265	0.871835	1.126	4	238		339	1.2264	1.179	4
GRB2_RAT	25190	153	0.941293	-0.087284	1.28686	4.33333	Growth factor receptor-bound protein 2 OS=Rattus norvegicus GN=Grb2 PE=1 SV=1	423		130	0.88502	1.141	5	244		272	0.758687	1.05	5	425		155	1.24211	1.334	3
CAPZB_RAT	30609	154	0.940287	-0.0888271	1.21435	5.33333	F-actin-capping protein subunit beta OS=Rattus norvegicus GN=Capzb PE=1 SV=1	235		305	0.975635	1.123	6	277		235	1.11799	1.107	4	244		328	0.762175	1.085	6
CALD1_RAT	60548	155	0.93986	-0.0894818	1.11678	12.6667	Non-muscle caldesmon OS=Rattus norvegicus GN=Cald1 PE=1 SV=1	39		1445	0.900347	1.091	17	60		926	1.0655	1.042	13	76		919	0.865417	1.123	8
AMPH_RAT	74832	156	0.934064	-0.0984069	1.10381	5.66667	Amphiphysin OS=Rattus norvegicus GN=Amph PE=1 SV=1	259	1	276	0.977027	1.041	5	284		232	1.00007	1.047	7	225	2	251	0.834049	1.1	5
GLRX3_RAT	37825	157	0.928418	-0.107154	1.08298	8.33333	Glutaredoxin-3 OS=Rattus norvegicus GN=Glrx3 PE=1 SV=2	178		416	0.859371	1.061	8	125		537	0.924099	1.074	10	183		445	1.0077	1.098	7
PP1B_RAT	37163	158	0.927346	-0.10882	1.07337	3.66667	Serine/threonine-protein phosphatase PP1-beta catalytic subunit OS=Rattus norvegicus GN=Ppp1cb PE=1 SV=3	210	1	336	0.930539	1.053	3	247	1	271	0.993612	1.181	4	170	1	469	0.862531	1.123	4
CAZA2_RAT	32947	159	0.926212	-0.110585	1.16175	7.66667	F-actin-capping protein subunit alpha-2 OS=Rattus norvegicus GN=Capza2 PE=1 SV=1	198	1	366	0.948812	1.07	8	280	1	233	1.06158	1.13	6	214	1	385	0.788857	1.044	9
HXK1_RAT	102342	160	0.924	-0.114034	1.61416	2.66667	Hexokinase-1 OS=Rattus norvegicus GN=Hk1 PE=1 SV=4	175	1	418	0.595208	1.035	2	228		297	0.861312	1.325	3	158		508	1.53882	1.296	3
RL8_RAT	28007	161	0.92126	-0.118319	1.39972	10	60S ribosomal protein L8 OS=Rattus norvegicus GN=Rpl8 PE=2 SV=2	133		553	0.689083	1.322	11	153		454	0.852087	1.171	7	83		844	1.33166	1.084	12
PYGM_RAT	97212	162	0.92086	-0.118946	1.11714	7	Glycogen phosphorylase, muscle form OS=Rattus norvegicus GN=Pygm PE=1 SV=5	164	1	437	0.971136	1.046	8	119	1	552	0.991761	1.084	6	122	1	616	0.810764	1.056	7
RS27A_RAT	17939	163	0.915326	-0.127642	1.2565	2	Ubiquitin-40S ribosomal protein S27a OS=Rattus norvegicus GN=Rps27a PE=1 SV=2	299		229	0.766219	1.2	2	236		288	0.845219	1.281	2	188		440	1.18415	1.049	2
RS8_RAT	24190	164	0.914072	-0.129621	1.12488	10.3333	40S ribosomal protein S8 OS=Rattus norvegicus GN=Rps8 PE=1 SV=2	87		767	0.798238	1.235	10	63		896	0.986812	1.417	8	70		993	0.969558	1.117	13
ROA3_RAT	39628	165	0.913374	-0.130722	1.11568	7	Heterogeneous nuclear ribonucleoprotein A3 OS=Rattus norvegicus GN=Hnrnpa3 PE=1 SV=1	304		219	0.811647	1.068	5	226		301	0.931812	1.067	6	162	1	486	1.00751	1.321	10
ELAV4_RAT	40938	166	0.910453	-0.135344	1.06795	11.3333	ELAV-like protein 4 OS=Rattus norvegicus GN=Elavl4 PE=1 SV=1	108	2	545	0.974246	1.049	11	88	2	704	0.906668	1.066	12	110	2	676	0.854389	1.098	11
TFAM_RAT	28169	167	0.905156	-0.143761	1.66402	2	Transcription factor A, mitochondrial OS=Rattus norvegicus GN=Tfam PE=2 SV=1	345		183	0.584201	1.051	2	415		124	0.802028	1.042	2	447		145	1.58277	1.198	2
MARK1_RAT	88180	168	0.904418	-0.144939	1.20423	15.3333	Serine/threonine-protein kinase MARK1 OS=Rattus norvegicus GN=Mark1 PE=1 SV=1	20	3	936	0.805281	1.051	16	24	3	738	0.819792	1.052	12	32	3	948	1.12061	1.38	18
PP1G_RAT	36960	169	0.901658	-0.149348	1.12765	2.66667	Serine/threonine-protein phosphatase PP1-gamma catalytic subunit OS=Rattus norvegicus GN=Ppp1cc PE=1 SV=1	210	3	189	0.951009	1.056	2	247	3	132	0.980938	1.207	2	170	3	385	0.785775	1.146	4
ELAV2_RAT	39481	170	0.90133	-0.149872	1.12408	11.6667	ELAV-like protein 2 OS=Rattus norvegicus GN=Elavl2 PE=1 SV=1	108	1	656	1.02277	1.069	12	88	1	715	0.88172	1.055	12	110	1	681	0.811976	1.099	11
SYNJ1_RAT	172773	171	0.899389	-0.152983	1.04946	13.6667	Synaptojanin-1 OS=Rattus norvegicus GN=Synj1 PE=1 SV=3	67	1	1004	0.913566	1.043	16	92		685	0.934706	1.015	11	73		947	0.851976	1.033	14
PP1A_RAT	37488	172	0.89791	-0.155357	1.14087	2.66667	Serine/threonine-protein phosphatase PP1-alpha catalytic subunit OS=Rattus norvegicus GN=Ppp1ca PE=1 SV=1	210	2	249	0.956324	1.059	3	247	2	165	0.980938	1.207	2	170	2	425	0.771706	1.187	3
BIN1_RAT	64493	173	0.897632	-0.155804	1.0604	3.33333	Myc box-dependent-interacting protein 1 OS=Rattus norvegicus GN=Bin1 PE=1 SV=1	259	2	225	0.866899	1.154	3	185		353	0.960519	1.076	2	225	1	358	0.868601	1.027	5
RS4X_RAT	29579	174	0.896374	-0.157827	1.29936	16.3333	40S ribosomal protein S4, X isoform OS=Rattus norvegicus GN=Rps4x PE=2 SV=2	73		912	0.737331	1.029	14	90		698	0.809248	1.08	13	34		1698	1.20704	1.347	22
CAZA1_RAT	32889	175	0.891782	-0.165236	1.1957	5	F-actin-capping protein subunit alpha-1 OS=Rattus norvegicus GN=Capza1 PE=1 SV=1	198	2	228	0.97889	1.116	5	280	2	224	0.998341	1.055	4	214	2	361	0.725711	1.102	6
SND1_RAT	101888	176	0.88511	-0.176071	1.09323	9	Staphylococcal nuclease domain-containing protein 1 OS=Rattus norvegicus GN=Snd1 PE=1 SV=1	52		1195	0.881127	1.388	11	59		945	0.811525	1.073	10	90		797	0.969731	1.088	6
EIF3H_RAT	39880	177	0.884708	-0.176727	1.24157	3.66667	Eukaryotic translation initiation factor 3 subunit H OS=Rattus norvegicus GN=Eif3h PE=1 SV=1	381		158	0.810046	1.107	4	522		84	0.755128	1.072	4	522		106	1.13206	1.66	3
RL28_RAT	15839	178	0.883647	-0.178457	1.39404	2	60S ribosomal protein L28 OS=Rattus norvegicus GN=Rpl28 PE=1 SV=4	432	1	127	1.1353	1.08	2	485		95	1.00253	1.155	2	543		100	0.606217	1.004	2
NCKP1_RAT	128781	179	0.883432	-0.178809	1.12829	13.3333	Nck-associated protein 1 OS=Rattus norvegicus GN=Nckap1 PE=2 SV=1	82		829	0.794378	1.078	15	66		876	0.861633	1.094	11	84		830	1.00733	1.051	14
DYN2_RAT	98169	180	0.87324	-0.19555	1.1094	4.66667	Dynamin-2 OS=Rattus norvegicus GN=Dnm2 PE=1 SV=1	91	2	449	0.806863	1.168	5	116	2	278	0.982191	1.075	5	94	3	336	0.840244	1.036	4
PURB_RAT	33398	181	0.873092	-0.195794	1.17883	11	Transcriptional activator protein Pur-beta OS=Rattus norvegicus GN=Purb PE=1 SV=3	119		608	0.760543	1.258	9	67		866	1.04744	1.337	12	92		786	0.835461	1.188	12
PYGB_RAT	96113	182	0.870622	-0.199881	1.1518	6.66667	Glycogen phosphorylase, brain form (Fragment) OS=Rattus norvegicus GN=Pygb PE=1 SV=3	164	2	289	0.870297	1.029	4	119	2	375	1.00297	1.075	8	122	2	247	0.75602	1.063	8
SNPH_RAT	54460	183	0.869516	-0.201716	1.10633	3.66667	Syntaphilin OS=Rattus norvegicus GN=Snph PE=1 SV=1	323		204	0.874374	1.086	5	233		291	0.959188	1.11	3	281		280	0.783847	1.245	3
RL4_RAT	47227	184	0.865218	-0.208864	1.17612	4.33333	60S ribosomal protein L4 OS=Rattus norvegicus GN=Rpl4 PE=1 SV=3	116		616	0.803705	1.059	4	123		546	1.04208	1.098	4	135		582	0.773354	1.081	5
MFF_RAT	24955	185	0.857088	-0.222484	1.05237	2.66667	Mitochondrial fission factor OS=Rattus norvegicus GN=Mff PE=1 SV=1	137		540	0.886548	1.134	3	200		328	0.808209	1.119	3	166		481	0.878721	1.209	2
CLAP2_RAT	140551	186	0.85552	-0.225126	1.12029	28	CLIP-associating protein 2 OS=Rattus norvegicus GN=Clasp2 PE=1 SV=1	13		2736	0.753566	1.023	31	21		1771	0.938127	1.148	25	14		2690	0.885744	1.192	28
SMBP2_RAT	108373	187	0.843268	-0.245937	1.15816	4.33333	DNA-binding protein SMUBP-2 OS=Rattus norvegicus GN=Ighmbp2 PE=1 SV=1	292		235	0.752186	1.064	5	263		255	0.8011	1.03	4	204		401	0.995143	1.045	4
HS90B_RAT	83229	188	0.842094	-0.247947	1.07557	4	Heat shock protein HSP 90-beta OS=Rattus norvegicus GN=Hsp90ab1 PE=1 SV=4	196	1	373	0.887602	1.277	4	190	1	347	0.77491	1.151	3	103	1	700	0.868185	1.116	5
CAH2_RAT	29096	189	0.839903	-0.251705	1.29058	2.66667	Carbonic anhydrase 2 OS=Rattus norvegicus GN=Ca2 PE=1 SV=2	397		146	0.725607	1.049	2	528		82	0.724158	1.175	3	690		59	1.12759	1.156	3
NMDE2_RAT	165965	190	0.836876	-0.256914	1.22842	2.33333	Glutamate receptor ionotropic, NMDA 2B OS=Rattus norvegicus GN=Grin2b PE=1 SV=1	354		174	0.985467	1.298	2	360		162	0.664251	1.192	3	369		188	0.895382	1.087	2
GRP78_RAT	72302	191	0.835578	-0.259154	1.19743	19.3333	78 kDa glucose-regulated protein OS=Rattus norvegicus GN=Hspa5 PE=1 SV=1	15	2	1421	0.887218	1.072	17	23	2	1316	0.963595	1.094	19	16	2	1833	0.682394	1.045	22
RSSA_RAT	32803	192	0.832292	-0.264838	1.06518	14.6667	40S ribosomal protein SA OS=Rattus norvegicus GN=Rpsa PE=1 SV=3	25		1807	0.786769	1.069	14	18		1945	0.822324	1.13	15	17		2462	0.891122	1.184	15
MAP1B_RAT	269334	193	0.827565	-0.273055	1.03928	40.6667	Microtubule-associated protein 1B OS=Rattus norvegicus GN=Map1b PE=1 SV=2	2	2	3618	0.799014	1.062	39	2	2	3978	0.822519	1.038	38	2	2	4732	0.862394	1.104	45
AP180_RAT	93460	194	0.826756	-0.274466	1.14325	4	Clathrin coat assembly protein AP180 OS=Rattus norvegicus GN=Snap91 PE=1 SV=1	163	1	438	0.789036	1.068	4	176	1	365	0.744888	1.101	4	182	1	445	0.96149	1.188	4
RL6_RAT	33541	195	0.824047	-0.279201	1.07812	15.3333	60S ribosomal protein L6 OS=Rattus norvegicus GN=Rpl6 PE=1 SV=5	40		1438	0.767651	1.13	12	47		1159	0.817468	1.057	14	28		1855	0.891707	1.144	20
SPS2L_RAT	61736	196	0.823901	-0.279457	1.14594	2.66667	SPATS2-like protein OS=Rattus norvegicus GN=Spats2l PE=2 SV=1	279		247	0.782273	1.262	4	304		212	0.961587	1.244	2	266		290	0.743496	1.032	2
RL13A_RAT	23461	197	0.821671	-0.283368	1.4208	6.33333	60S ribosomal protein L13a OS=Rattus norvegicus GN=Rpl13a PE=1 SV=2	230		309	0.620383	1.177	6	107		626	0.734065	1.292	7	124		615	1.21815	1.269	6
PRKRA_RAT	34334	198	0.820166	-0.286012	1.0316	10.3333	Interferon-inducible double-stranded RNA-dependent protein kinase activator A OS=Rattus norvegicus GN=Prkra PE=1 SV=1	181		409	0.840121	1.227	11	237		288	0.829319	1.203	9	131		599	0.791848	1.255	11
RL17_RAT	21383	199	0.816583	-0.292329	1.27034	5.66667	60S ribosomal protein L17 OS=Rattus norvegicus GN=Rpl17 PE=2 SV=3	265		268	0.714249	1.101	5	248		270	0.708227	1.051	6	236		341	1.07641	1.127	6
CNKR2_RAT	117317	200	0.812829	-0.298977	1.05113	6.66667	Connector enhancer of kinase suppressor of ras 2 OS=Rattus norvegicus GN=Cnksr2 PE=1 SV=1	110		650	0.860001	1.072	9	148		458	0.798143	1.212	6	112	1	665	0.782379	1.255	5
ELAV1_RAT	36146	201	0.811391	-0.30153	1.12554	4.66667	ELAV-like protein 1 OS=Rattus norvegicus GN=Elavl1 PE=1 SV=1	280		247	0.850649	1.066	5	309		210	0.885442	1.13	4	160		505	0.70922	1.134	5
H14_RAT	21974	202	0.81087	-0.302457	1.07027	4.66667	Histone H1.4 OS=Rattus norvegicus GN=Hist1h1e PE=1 SV=3	216		327	0.766934	1.152	4	150	1	457	0.874589	1.102	4	121	1	618	0.794862	1.188	6
RS9_RAT	22578	203	0.809868	-0.304242	1.28055	13.6667	40S ribosomal protein S9 OS=Rattus norvegicus GN=Rps9 PE=1 SV=4	162		441	0.667794	1.096	12	96		663	0.743208	1.072	14	144		565	1.07026	1.125	15
RL10A_RAT	24816	204	0.807641	-0.308214	1.29677	9	60S ribosomal protein L10a OS=Rattus norvegicus GN=Rpl10a PE=1 SV=2	191		392	0.607535	1.152	8	50		1008	0.857789	1.17	10	80	1	890	1.01089	1.147	9
CTND2_RAT	28910	205	0.805933	-0.311268	1.17816	2.66667	Catenin delta-2 (Fragment) OS=Rattus norvegicus GN=Ctnnd2 PE=1 SV=1	306		214	0.737993	1.062	3	411		126	0.973762	1.307	2	301		252	0.728437	1.284	3
DREB_RAT	77424	206	0.804315	-0.314167	1.07489	3.66667	Drebrin OS=Rattus norvegicus GN=Dbn1 PE=1 SV=3	170		425	0.859281	1.365	4	225		301	0.744648	1.046	4	346		200	0.813192	1.412	3
DDB1_RAT	126781	207	0.804221	-0.314337	1.06198	3.66667	DNA damage-binding protein 1 OS=Rattus norvegicus GN=Ddb1 PE=1 SV=1	301		226	0.77198	1.081	4	348		167	0.781914	1.123	5	441		148	0.86171	1.246	2
MIC60_RAT	67135	208	0.799733	-0.322409	1.18212	10.3333	MICOS complex subunit Mic60 (Fragment) OS=Rattus norvegicus GN=Immt PE=1 SV=1	74	1	897	0.876988	1.057	12	57		982	0.88465	1.095	9	81	1	867	0.659281	1.068	10
FARP1_RAT	118768	209	0.799143	-0.323474	1.08808	7.66667	FERM, RhoGEF and pleckstrin domain-containing protein 1 OS=Rattus norvegicus GN=Farp1 PE=1 SV=2	66		1016	0.81406	1.055	10	106		630	0.728809	1.099	7	146		550	0.860208	1.145	6
SYRC_RAT	75762	210	0.797173	-0.327036	1.17322	3.66667	Arginine--tRNA ligase, cytoplasmic OS=Rattus norvegicus GN=Rars PE=1 SV=2	185		404	0.930012	1.09	4	201		326	0.805763	1.072	4	227		352	0.676023	1.129	3
PRC2A_RAT	228908	211	0.794387	-0.332086	1.17593	3.66667	Protein PRRC2A OS=Rattus norvegicus GN=Prrc2a PE=1 SV=1	190		398	0.833641	1.01	3	187		349	0.906905	1.162	5	268		290	0.663064	1.1	3
CSDE1_RAT	88839	212	0.793367	-0.333941	1.23041	4	Cold shock domain-containing protein E1 OS=Rattus norvegicus GN=Csde1 PE=2 SV=1	219		323	0.963956	1.11	4	269		246	0.812001	1.189	3	312		236	0.637981	1.098	5
KPCG_RAT	78307	213	0.787691	-0.344298	1.19277	10	Protein kinase C gamma type OS=Rattus norvegicus GN=Prkcg PE=1 SV=1	99		709	0.799792	1.099	10	126	1	537	0.931938	1.051	12	150		521	0.655698	1.048	8
[truncated: 65 more rows]

## Sheet: Figure 2B
Protein Accession	Protein rank by L/H Ratio	mean L/H Ratio	Bayés et al., PLOS One 2012, Oct Volume 7, Issue 10; e46683
SORT_RAT	1	11.9402
[truncated: 278 more rows]
