# Supplementary material for: Intramolecular domain dynamics regulate synaptic MAGUK protein interactions
Source: eLife journal article supplement (doi:10.7554/elife.41299), 2019-03-13
Supplement: supp [file elife-41299-supp-v1.zip › elife_poa_e41299_Figure_3_source_data_1.xlsx]

## Sheet: Figure 3
Figure 3A
		Band Volume	Normalised	Band Volume	Normalised	Band Volume	Normalised	Mean	SEM
GST	Lane 1	1.5643e+06	0.0620917	1.67003e+06	0.0612451	2.63723e+06	0.134346	0.0858943	0.0242271
GST-SH3-GK	Lane 2	6.89408e+06	0.273647	1.3858e+07	0.508218	1.07082e+07	0.545497	0.442454	0.0850869
GST-GK	Lane 3	2.51934e+07	1	2.72679e+07	1	1.96301e+07	1	1	0
		Experiment 1		Experiment 2		Experiment 3
Figure 3B
		Band Volume	Normalised	Band Volume	Normalised	Band Volume	Normalised	Mean	SEM
Gnb5 + SH3-GK	Lane 1	6.37062e+06	0.0811239	12185594	0.0860981	9.62829e+06	0.106336	0.091186	0.00770986
Gnb5 + GK	Lane 2	7.92436e+06	0.100909	1.09956e+07	0.0776905	7.49959e+06	0.0828263	0.0871421	0.00704153
Gnb5 + SH3-GK	Lane 3	1.62941e+07	0.20749	2.02227e+07	0.142885	1.41828e+07	0.156637	0.169004	0.0196483
Gnb5 + GK	Lane 4	78529437	1	1.41531e+08	1	9.0546e+07	1	1	0
		Experiment 1		Experiment 2		Experiment 3
