# Supplementary material for: Intramolecular domain dynamics regulate synaptic MAGUK protein interactions
Source: eLife journal article supplement (doi:10.7554/elife.41299), 2019-03-13
Supplement: supp [file elife-41299-supp-v1.zip › elife_poa_e41299_Figure_4_source_data_1.xlsx]

## Sheet: Figure 4
Figure 4A
		Band Volume	Normalised	Band Volume	Normalised	Band Volume	Normalised	Mean	SEM
PSD-95 + shortGnb5 + PDZ3 ligand	Lane 1	7.56736e+06	0.231161	1.71065e+07	0.350597	1.16138e+07	0.277492	0.286417	0.0347659
PSD-95 + shortGnb5 + mutPDZ3 ligand	Lane 2	686018	0.0209558	8.00084e+06	0.163977	3.17541e+06	0.0758712	0.0869346	0.0416555
PSD-95 + Gnb5 + PDZ3 ligand	Lane 3	3.27364e+07	1	4.87925e+07	1	4.18527e+07	1	1	0
PSD-95 + Gnb5 + mutPDZ3 ligand	Lane 4	1.39438e+06	0.0425941	8.37576e+06	0.171661	4.76985e+06	0.113968	0.109408	0.0373281
		Experiment 1		Experiment 2		Experiment 3
Figure 4B
		Band Volume	Normalised	Band Volume	Normalised	Band Volume	Normalised	Mean	SEM
PSG + Gnb5 + PDZ3 ligand	Lane 1	863013	0.0093224	241389	0.00221144	661408	0.00570383	0.00574589	0.00205287
PSG + Gnb5 + mutPDZ3 ligand	Lane 2	930378	0.0100501	738670	0.00676719	2092481	0.0180451	0.0116208	0.00334903
PSG + Gnb5 + PDZ3 ligand	Lane 3	9.2574e+07	1	1.09155e+08	1	1.15959e+08	1	1	0
PSG + Gnb5 + mutPDZ3 ligand	Lane 4	853624	0.00922099	794824	0.00728163	2.05122e+06	0.0176892	0.0113973	0.00319539
		Experiment 1		Experiment 2		Experiment 3
Figure 4C
		Band Volume	Normalised	Band Volume	Normalised	Band Volume	Normalised	Mean	SEM
PSG + Gnb5	Lane 1	9.18739e+06	0.119594	2.70619e+06	0.0612293	5.40314e+06	0.14402	0.108281	0.0245597
PSG L460P + Gnb5	Lane 2	10154570	0.132183	2.06235e+06	0.0466619	5.07403e+06	0.135247	0.104698	0.0290313
PSG + Gnb5	Lane 3	8.42044e+06	0.10961	2.0739e+06	0.0469234	4435514	0.118228	0.091587	0.02247
Gnb5 + L460P	Lane 4	7.68218e+07	1	4.41976e+07	1	3.75167e+07	1	1	0
		Experiment 1		Experiment 2		Experiment 3
