# Supplementary material for: Intramolecular domain dynamics regulate synaptic MAGUK protein interactions
Source: eLife journal article supplement (doi:10.7554/elife.41299), 2019-03-13
Supplement: supp [file elife-41299-supp-v1.zip › elife_poa_e41299_Figure_5_source_data_1.xlsx]

## Sheet: Figure 5
Figure 5A
		Band Volume	Normalised	Band Volume	Normalised	Band Volume	Normalised	Mean	SEM
PSG + GKAP	Lane 1	193044	0.00198195	486997	0.00471911	1.6353e+06	0.0142888	0.0069966	0.00373071
PSG R568A + GKAP	Lane 2	251207	0.00257909	618175	0.00599025	1.53195e+06	0.0133857	0.00731835	0.00318949
GK + GKAP	Lane 3	786487	0.0080747	1.34683e+06	0.0130511	2.79251e+06	0.0244001	0.0151753	0.00483093
PSG + GKAP	Lane 4	9.74013e+07	1	1.03197e+08	1	1.14447e+08	1	1	0
PSG R568A + GKAP	Lane 5	2.16016e+06	0.0221779	2.72483e+06	0.0264042	3.43339e+06	0.0299999	0.026194	0.00226048
GK + GKAP	Lane 6	9.70676e+07	0.996574	9.62472e+07	0.932658	9.93451e+07	0.868047	0.932426	0.0371027
		Experiment 1		Experiment 2		Experiment 3
Figure 5B
		Band Volume	Normalised	Band Volume	Normalised	Band Volume	Normalised	Mean	SEM
PSD-95 + Gnb5 + PDZ3 ligand	Lane 1	2.86611e+07	1	2.73011e+07	1	5.26745e+07	1	1	0
PSD-95 + Gnb5 + mutPDZ3 ligand	Lane 2	1.23675e+06	0.0431508	7.03599e+06	0.257718	6.69576e+06	0.127116	0.142661	0.062426
PSD-95 R568A + Gnb5 + PDZ3 ligand	Lane 3	2.31701e+07	0.808415	3.66492e+07	1.3424	5.93513e+07	1.12676	1.09253	0.155097
PSD-95 R568A + Gnb5 + mutPDZ3 ligand	Lane 4	927781	0.0323708	6.17223e+06	0.22608	4.02786e+06	0.0764671	0.111639	0.058619
		Experiment 1		Experiment 2		Experiment 3
Figure 5C
		Band Volume	Normalised	Band Volume	Normalised	Band Volume	Normalised	Mean	SEM
PSD-95 + GKAP + PDZ3 ligand	Lane 1	317173	0.00327338	425395	0.00595214	735388	0.00539485	0.00487346	0.000816051
PSD-95 + GKAP + mutPDZ3 ligand	Lane 2	1.31637e+06	0.0135856	914702	0.0127985	2.35832e+06	0.0173008	0.0145616	0.00138828
PSD-95 + GKAP + PDZ3 ligand	Lane 3	9.68945e+07	1	7.14693e+07	1	136313072	1	1	0
PSD-95 + GKAP + mutPDZ3 ligand	Lane 4	7.86118e+07	0.811313	6.7494e+07	0.944377	1.0059e+08	0.737934	0.831208	0.0604195
		Experiment 1		Experiment 2		Experiment 3
