# Supplementary figures and images for: Intramolecular domain dynamics regulate synaptic MAGUK protein interactions
Source: eLife journal article supplement (doi:10.7554/elife.41299), 2019-03-13

**Figure 1- Figure supplement 1**

**A**

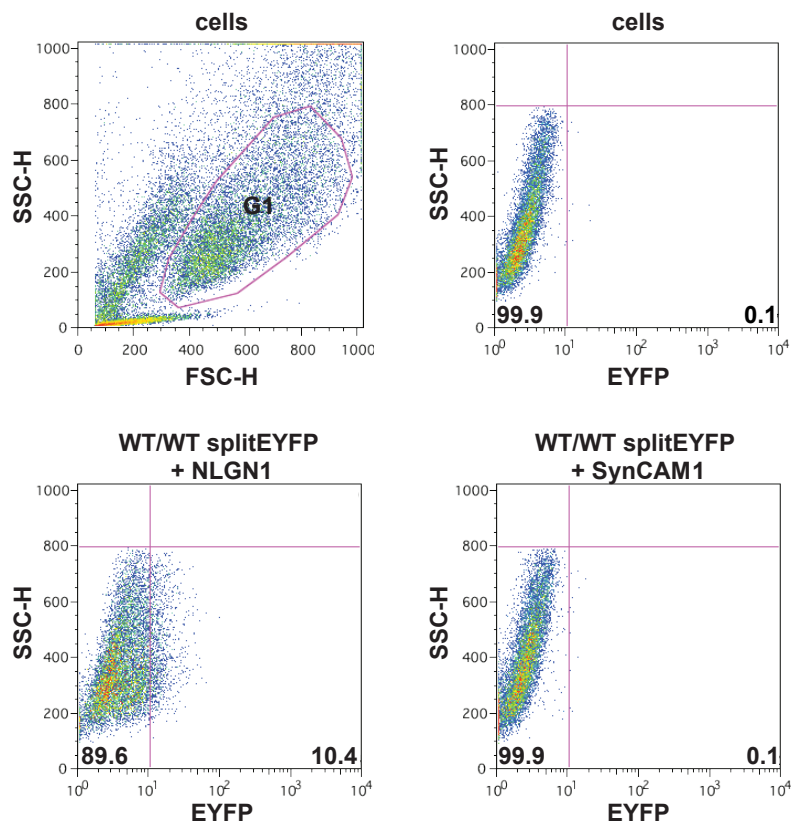

**B**

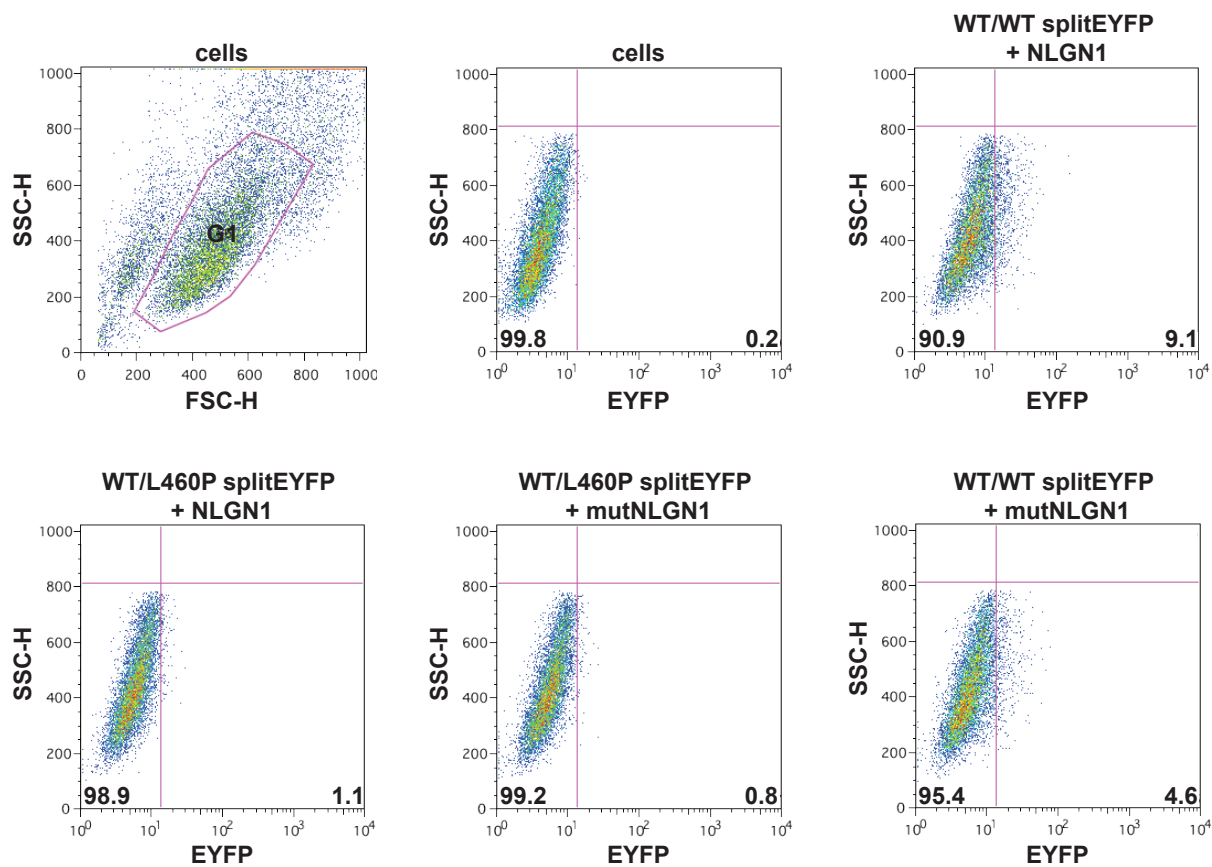

Supplement: supp [file elife-41299-supp-v1.zip › elife_poa_e41299_Figure_1_figure_supplement_1.pdf]

# Figure 1- Figure supplement 2

**A**

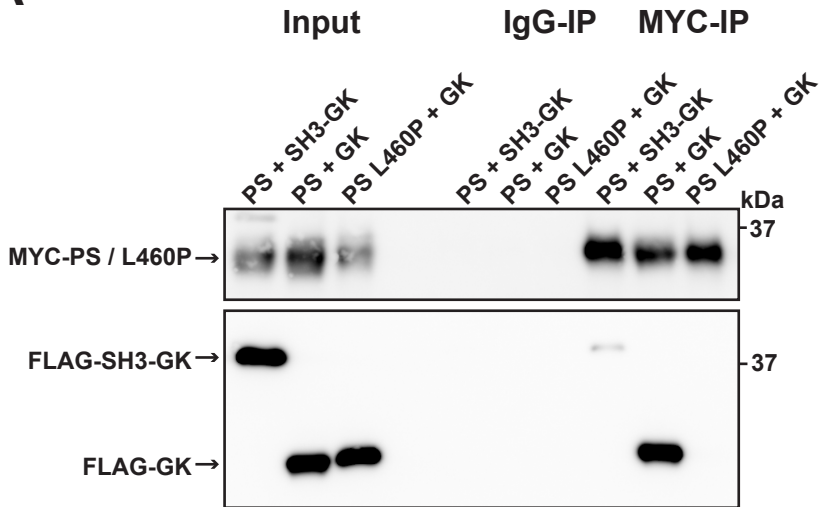

Supplement: supp [file elife-41299-supp-v1.zip › elife_poa_e41299_Figure_1_figure_supplement_2.pdf]
